# Supplementary material
Source: PubMed Central journal article supplement (PMC2805443)
Supplement: NIHMS157145-supplement-1_si_001.pdf [file NIHMS157145-supplement-1_si_001.pdf]

# Pd-Catalyzed N-Arylation of Secondary Acyclic Amides: Catalyst Development, Scope, and Computational Study

*Jacqueline D. Hicks, Alan M. Hyde, Alberto Martinez Cuezva,  
and Stephen L. Buchwald*

Department of Chemistry, Massachusetts Institute of Technology  
Cambridge, MA 02139

## **Supporting Information**

### **Table of Contents**

|                                                           |       |
|-----------------------------------------------------------|-------|
| Reaction Optimization.....                                | SI-2  |
| General Information.....                                  | SI-3  |
| Ligand Synthesis.....                                     | SI-4  |
| Amidation Examples from Tables 1–4 .....                  | SI-9  |
| Synthesis of Aryl Nonaflates.....                         | SI-20 |
| Synthesis of Amides and Related Nucleophiles.....         | SI-21 |
| Procedures for in situ IR Spectroscopy.....               | SI-26 |
| Cartesian Coordinates for all Calculated Structures ..... | SI-27 |
| Full Reference 32.....                                    | SI-85 |
| NMR Spectra .....                                         | SI-86 |

## Reaction Optimization

**Table SI-1.** Ligand Investigation and Reaction Optimization<sup>a</sup>

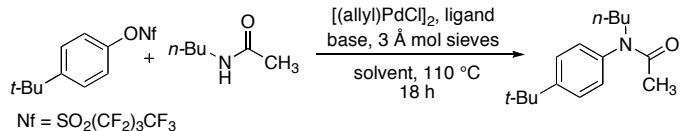

| entry           | ligand       | base                                       | solvent        | conversion (%) | yield (%) |
|-----------------|--------------|--------------------------------------------|----------------|----------------|-----------|
| 1               | <b>L1</b>    | K <sub>2</sub> CO <sub>3</sub>             | toluene        | 13             | 5         |
| 2               | <b>LSI-1</b> | K <sub>2</sub> CO <sub>3</sub>             | toluene        | 6              | 0         |
| 3               | <b>L2</b>    | K <sub>2</sub> CO <sub>3</sub>             | toluene        | 41             | 27        |
| 4               | <b>LSI-2</b> | K <sub>2</sub> CO <sub>3</sub>             | toluene        | 1              | 0         |
| 5               | <b>L3</b>    | K <sub>2</sub> CO <sub>3</sub>             | toluene        | 49             | 21        |
| 6               | <b>LSI-3</b> | K <sub>2</sub> CO <sub>3</sub>             | toluene        | 29             | 6         |
| 7               | <b>L4</b>    | K <sub>2</sub> CO <sub>3</sub>             | toluene        | 16             | 0         |
| 8               | <b>L5</b>    | K <sub>2</sub> CO <sub>3</sub>             | toluene        | 34             | 24        |
| 9               | <b>L6</b>    | K <sub>2</sub> CO <sub>3</sub>             | toluene        | 100            | 87        |
| 10              | <b>L6</b>    | K <sub>2</sub> CO <sub>3</sub>             | <i>t</i> -BuOH | 100            | 23        |
| 11              | <b>L6</b>    | K <sub>2</sub> CO <sub>3</sub>             | DME            | 45             | 18        |
| 12              | <b>L6</b>    | NaOt-Bu                                    | toluene        | 100            | 0         |
| 13 <sup>b</sup> | <b>L6</b>    | K <sub>2</sub> CO <sub>3</sub> , No Sieves | toluene        | 100            | 69        |
| 14 <sup>c</sup> | <b>L6</b>    | K <sub>2</sub> CO <sub>3</sub> ,           | toluene        | 100            | 90        |

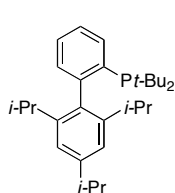

**LSI-1**, *t*-Bu<sub>2</sub>XPhos

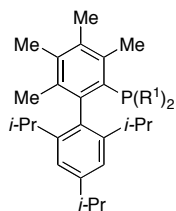

**LSI-2**, Me<sub>4</sub>XPhos, R<sup>1</sup> = Cy

**LSI-3**, Me<sub>4</sub>*t*-Bu<sub>2</sub>XPhos, R<sup>1</sup> = *t*-Bu

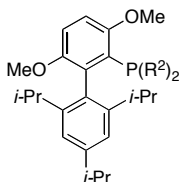

**L2**, BrettPhos, R<sup>2</sup> = Cy

**L3**, *t*-Bu<sub>2</sub>BrettPhos, R<sup>2</sup> = *t*-Bu

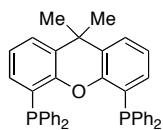

**L1**, Xantphos

**L4**, R<sup>2</sup> = Ph

**L5**, R<sup>2</sup> =

**L6**, JackiePhos R<sup>2</sup> =

<sup>a</sup> ArONf (1 equiv), amide (2.5 equiv), [(allyl)PdCl]<sub>2</sub> (1 mol%), ligand (5 mol%), base (2.0 equiv), 3 Å mol sieves (50 mg/mL), solvent (0.25 M), 110 °C, 18 h. <sup>b</sup> 4,4'-oxybis(*tert*-butylbenzene) was observed as minor product. <sup>c</sup> Pd(OAc)<sub>2</sub>/H<sub>2</sub>O activation was used in place of [(allyl)PdCl]<sub>2</sub>.

## General Information

All reactions were carried out in resealable test tubes with teflon septum under a dry argon atmosphere.  $[\text{Pd}(\text{allyl})\text{Cl}]_2$  and xantphos (**L1**) were purchased from Strem. *t*-Bu<sub>2</sub>XPhos and Me<sub>4</sub>*t*-Bu<sub>2</sub>XPhos were purchased from Aldrich. Anhydrous K<sub>2</sub>CO<sub>3</sub> (99%, Aldrich), K<sub>3</sub>PO<sub>4</sub> (Riedel-de Haën), and Cs<sub>2</sub>CO<sub>3</sub> (Chemetall) were stored under nitrogen in a Vacuum Atmospheres glovebox. Small portions (~5 g) were removed from the glovebox in glass vials, stored in a desiccator filled with anhydrous calcium sulfate, and weighed in the air. Chlorophosphines were purchased from Alfa Aesar. Amides were purchased from commercial sources and used without further purification. Aryl halides and phenols were purchased from commercial sources and, when necessary, filtered through neutral alumina. 3 Å powered molecular sieves were purchased from Avocado. Anhydrous toluene was purchased from J. T. Baker in CYCLE-TAINER® solvent delivery kegs and vigorously purged with argon for 2 h. The solvent was further purified by passing it through two packed columns of neutral alumina under argon. Flash column chromatography was performed using a Biotage SP4 Flash Purification System using KP-Sil flash cartridges.

All new compounds were characterized by <sup>1</sup>H NMR, <sup>13</sup>C NMR, IR spectroscopy, and elemental analysis (Atlantic Microlab, Inc., Norcross, GA). Nuclear Magnetic Resonance spectra were recorded on a Bruker 400 MHz or Varian 300 MHz instrument. Infrared spectra were recorded using a Perkin–Elmer 2000 FT-IR. All <sup>1</sup>H NMR experiments are reported in δ units, parts per million (ppm) downfield from tetramethylsilane and were measured relative to the signals for residual chloroform (7.26 ppm) in the deuterated solvents. All <sup>13</sup>C NMR spectra are reported in ppm relative to deuteriochloroform (77.0 ppm). Melting points (uncorrected) were obtained on a Mel-Temp capillary melting point apparatus. Gas chromatographic analyses were performed on a Hewlett-Packard 6890 gas chromatography instrument with an FID detector using DB1 (10 m x 0.20 mm) capillary. *In situ* monitoring of reactions using infrared spectroscopy was performed with a Mettler-Toledo iC10 ReactIR instrument equipped with a C1Fiber with a diamond-tipped probe.

**General procedure A – For Chart 1 and Table SI-1:** An oven-dried test tube fitted with a teflon septum and magnetic stir bar was charged with K<sub>2</sub>CO<sub>3</sub> (69 mg, 0.5 mmol) and 3 Å mol sieves (100 mg). The powder was flame-dried under vacuum to activate the molecular sieves and remove trace water. After cooling to rt, the vessel was then charged with the ligand (5 mol%) and evacuated and backfilled with argon (this process was repeated a total of three times). *N*-Butylacetamide (72 mg, 0.63 mmol), 4-*t*-butylphenyl nonaflate (108 mg, 0.25 mmol), and a solution of [Pd(allyl)Cl]<sub>2</sub> in toluene (2 mol% Pd, 0.005 M) were added via syringe. The solution was heated to 110 °C for 17 h, cooled to room temperature, and diluted with ethyl acetate. Dodecane was then added as an internal standard and the reaction mixture was analyzed by GC.

**General procedure B – For Table SI-1, Entry 14, Water Activation:** An oven-dried test tube, equipped with a magnetic stir bar and fitted with a teflon septum, was charged with Pd(OAc)<sub>2</sub> (2 mol%) and L6 (5 mol%). The vessel was evacuated and backfilled with argon (this process was repeated a total of three times), then toluene (1 mL) and degassed H<sub>2</sub>O (8 mol%) were added via syringe. After addition of the water, the solution was heated to 110 °C for 1 min. A second oven-dried test tube fitted with a teflon septum and magnetic stir bar was charged with K<sub>2</sub>CO<sub>3</sub> (69 mg, 0.5 mmol) and 3 Å mol sieves (100 mg). The powder was flame-dried under vacuum to activate the molecular sieves and remove trace water. *N*-Butylacetamide (72 mg, 0.63 mmol), 4-*t*-butylphenyl nonaflate (108 mg, 0.25 mmol), and a solution of the catalyst prepared above were added via syringe. The solution was heated to 110 °C for 17 h, cooled to room temperature, and diluted with ethyl acetate. Dodecane was then added as an internal standard and the reaction mixture was analyzed by GC

## Ligand Synthesis

Known ligands: BrettPhos (L2),<sup>1</sup> *t*-Bu<sub>2</sub>BrettPhos (L3),<sup>2</sup> and Me<sub>4</sub>XPhos (LSI-2),<sup>1</sup> were synthesized according to literature procedures.

**General procedure C – Synthesis of Triarylphosphines in Chart 1 and Table 6:** To a sealable Schlenk tube containing a -78 °C solution of biaryl iodide (1 equiv) in THF was added *n*-BuLi (1.05 equiv) dropwise via syringe. The solution was stirred for 1 h at -78 °C and CuCl (1 equiv) was added quickly by opening the Schlenk tube under a stream of Ar. The reaction mixture was allowed to warm to rt (the CuCl dissolved) and a solution of chlorophosphine (1 equiv) was added. The Schlenk tube was sealed and heated to 70 °C for 18 h. The reaction mixture was cooled to rt, diluted with EtOAc, and washed with 30% NH<sub>4</sub>OH (3x), sat. NaHCO<sub>3</sub> (aq), and brine; then dried over Na<sub>2</sub>SO<sub>4</sub>, filtered and concentrated. The resulting solid was crystallized from acetone to yield a white solid.

<sup>1</sup> Fors, B. P.; Watson, D. A.; Biscoe, M. R.; Buchwald, S. L. *J. Am. Chem. Soc.* **2008**, *130*, 13552.

<sup>2</sup> Fors, B. P.; Dooleweerd, K.; Zeng, Q.; Buchwald, S. L. *Tetrahedron*, **2009**, *65*, 6576.



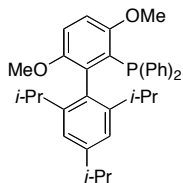

**Diphenyl(2',4',6'-triisopropyl-3,6-dimethoxybiphenyl-2-yl)phosphine (L4).** Following general procedure A, a mixture of 2-iodo-2',4',6'-triisopropyl-3,6-dimethoxybiphenyl<sup>1</sup> (0.5 g, 1.07 mmol) in THF (6 mL) was treated with *n*-BuLi (480  $\mu$ L, 2.5 M in hexane, 1.15 mmol), CuCl (106 mg, 1.07 mmol), and Ph<sub>2</sub>PCl (196  $\mu$ L, 1.07 mmol). The crude product was crystallized from acetone (58 mg, 10%): mp 200–202 °C; <sup>1</sup>H NMR (400 MHz, CDCl<sub>3</sub>)  $\delta$ : 7.25–7.18 (m, 10H), 7.01 (d, *J* = 8.8 Hz, 1H), 6.93 (s, 2H), 6.86 (d, *J* = 8.8 Hz, 1H), 3.66 (s, 3H), 3.17 (s, 3H), 2.93 (septet, *J* = 7.2 Hz, 1H), 2.48 (septet, *J* = 7.2 Hz, 2H), 1.29 (d, *J* = 7.2 Hz, 6H), 0.97 (d, *J* = 6.8 Hz, 6H), 0.81 (d, *J* = 6.8 Hz, 6H); <sup>13</sup>C NMR (100 MHz, CDCl<sub>3</sub>)  $\delta$ : 155.9, 152.2, 152.1, 147.4, 146.2, 139.0, 138.6, 138.3, 138.1, 132.5, 132.4, 132.3, 132.1, 127.61, 127.55, 127.0, 126.3, 126.1, 120.2, 112.6, 111.4, 55.1, 33.9, 30.9, 24.9, 23.9, 22.6 (Observed complexity due to P–C splitting); <sup>31</sup>P NMR (161 MHz, CDCl<sub>3</sub>)  $\delta$ : -16.17; IR (thin film) 2957, 1579, 1256 cm<sup>-1</sup>; Anal. Calcd. for C<sub>35</sub>H<sub>41</sub>O<sub>2</sub>P: C, 80.12; H, 7.88. Found: C, 80.11; H, 7.84.

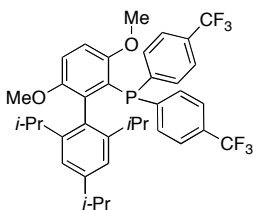

**bis(4-(trifluoromethyl)phenyl)(2',4',6'-triisopropyl-3,6-dimethoxybiphenyl-2-yl)phosphine (L5).** Following general procedure A, a mixture of 2-iodo-2',4',6'-triisopropyl-3,6-dimethoxybiphenyl<sup>1</sup> (300 mg, 0.64 mmol) in THF (4 mL) was treated with *t*-BuLi (780  $\mu$ L, 1.8 M in pentane, 1.3 mmol), CuCl (64 mg, 0.64 mmol), and (4-CF<sub>3</sub>Ph)<sub>2</sub>PCl (227  $\mu$ L, 0.64 mmol). The crude product was crystallized from acetone (181 mg, 45%): mp 202–204 °C; <sup>1</sup>H NMR (400 MHz, CDCl<sub>3</sub>)  $\delta$ : 7.27–7.17 (m, 10H), 6.64 (d, *J* = 8.8 Hz, 1H), 6.45 (d, *J* = 9.2 Hz, 1H), 3.13 (s, 3H), 2.84 (septet, *J* = 6.8 Hz, 1H), 2.77 (s, 3H), 2.72 (septet, *J* = 6.8 Hz, 2H), 1.26 (d, *J* = 6.8 Hz, 6H), 1.22 (d, *J* = 7.2 Hz, 6H), 1.03 (d, *J* = 6.8 Hz, 6H); <sup>13</sup>C NMR (100 MHz, CDCl<sub>3</sub>)  $\delta$ : 155.50, 155.48, 152.6, 152.4, 148.6, 146.7, 147.6, 143.0, 139.8, 139.4, 132.7, 132.6, 132.4, 129.6, 129.3, 128.0, 127.9, 127.8, 127.7, 127.6, 126.1, 124.62, 124.58, 124.57, 124.5, 124.3, 123.4, 120.7, 113.44, 113.42, 111.3, 54.4, 54.3, 34.5, 31.3, 25.1, 24.0, 22.8 (Observed complexity due to P–C and C–F splitting); <sup>31</sup>P NMR (161 MHz, CDCl<sub>3</sub>)  $\delta$ : -16.97; <sup>19</sup>F NMR (376 MHz, CDCl<sub>3</sub>)  $\delta$ : -62.90; IR (thin film) 2956, 2361, 1123 cm<sup>-1</sup>; Anal. Calcd. for C<sub>37</sub>H<sub>40</sub>F<sub>6</sub>O<sub>2</sub>P: C, 67.26; H, 5.95. Found: C, 67.45; H, 6.01.

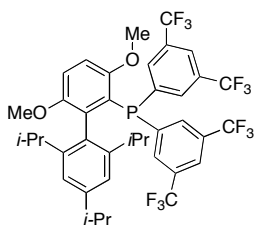

**bis(3,5-bis(trifluoromethyl)phenyl)(2',4',6'-triisopropyl-3,6-dimethoxybiphenyl-2-yl)phosphine (L6).** Following general procedure A, a mixture of 2-iodo-2',4',6'-triisopropyl-3,6-dimethoxybiphenyl<sup>1</sup> (1.0 g, 2.1 mmol) in THF (13 mL) was treated with *n*-BuLi (880  $\mu$ L, 2.5 M in hexane, 2.2 mmol), CuCl (208 mg, 2.1 mmol), and (3,5-bisCF<sub>3</sub>Ph)<sub>2</sub>PCl (1.03 g, 1.07 mmol). The crude product was crystallized from acetone (1.17 g, 70%): mp 185–190 °C; <sup>1</sup>H NMR (400 MHz, CDCl<sub>3</sub>)  $\delta$ : 7.76 (s, 2H), 7.64 (d, *J* = 6.0 Hz, 4H), 7.13 (d, *J* = 8.8 Hz, 1H), 7.00 (s, 2H), 6.90 (d, *J* = 9.2 Hz, 1H), 3.71 (s, 3H), 3.33 (s, 3H), 2.95 (septet, *J* = 6.8 Hz, 1H), 2.39 (septet, *J* = 6.8 Hz, 2H), 1.30 (d, *J* = 6.8 Hz, 6H), 1.00 (d, *J* = 6.8 Hz, 6H), 0.83 (d, *J* = 7.6 Hz, 6H); <sup>13</sup>C NMR (100 MHz, CDCl<sub>3</sub>)  $\delta$ : 155.0,

154.97, 152.6, 152.5, 148.4, 146.3, 146.2, 140.5, 140.3, 139.8, 139.4, 132.4, 132.2, 131.7, 131.6, 131.5, 131.30, 131.25, 131.0, 130.9, 130.6, 127.3, 124.6, 121.9, 121.7, 121.1, 120.5, 119.2, 114.7, 111.0, 55.2, 54.5, 34.0, 31.0, 24.8, 23.9, 22.6 (Observed complexity due to P–C and C–F splitting);  $^{31}\text{P}$  NMR (161 MHz,  $\text{CDCl}_3$ )  $\delta$ : -15.5;  $^{19}\text{F}$  NMR (376 MHz,  $\text{CDCl}_3$ )  $\delta$ : -63.0–(-63.7); IR (thin film) 2962, 1278  $\text{cm}^{-1}$ ; Anal. Calcd. for  $\text{C}_{39}\text{H}_{37}\text{F}_{12}\text{O}_2\text{P}$ : C, 58.80; H, 4.68. Found: C, 58.58; H, 4.87.

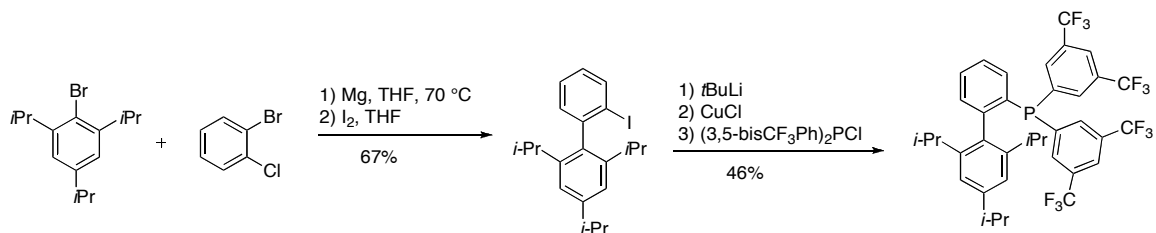

L10

**bis(3,5-bis(trifluoromethyl)phenyl)(2',4',6'-triisopropylbiphenyl-2-yl)phosphine**

(L7). An oven-dried 100 mL round bottom flask was equipped with a magnetic stir bar, charged with magnesium shavings (1.15 g, 48 mmol) and fitted with a reflux condenser. The flask was purged with argon and then THF (28 mL) and 2,4,6-triisopropylbromobenzene (7.15 mL, 20 mmol) were added via syringe. The reaction mixture was heated to reflux and 1,2-dibromoethane (50  $\mu\text{L}$ ) was added via syringe. After heating to reflux for 1 h, 2-bromochlorobenzene (2.58 mL, 22 mmol) was added dropwise via syringe over 0.5 h. After an additional 1 h at reflux, the reaction mixture was cooled to rt and a solution of  $\text{I}_2$  (5.56 g, 22 mmol) in THF (10 mL) was added via cannula until a deep purple color persisted. The reaction mixture was then quenched with MeOH and filtered. The filtrate was then washed with  $\text{Na}_2\text{S}_2\text{O}_3$  and brine, then dried over  $\text{Na}_2\text{SO}_4$ , filtered and concentrated. The resulting solid was crystallized from acetone to yield a white powder (5.4 g, 67%)<sup>3</sup>: mp 148 °C (lit. 150–152 °C);  $^1\text{H}$  NMR (400 MHz,  $\text{CDCl}_3$ )  $\delta$ : 7.94 (d,  $J$  = 8.0 Hz, 1H), 7.38 (t,  $J$  = 7.2 Hz, 1H), 7.19 (d,  $J$  = 7.6 Hz, 1H), 7.05–7.01 (m, 3H), 2.95 (septet,  $J$  = 6.8 Hz, 1H), 2.38 (septet,  $J$  = 7.2 Hz, 2H), 1.30 (d,  $J$  = 7.2 Hz, 6H), 1.21 (d,  $J$  = 6.8 Hz, 6H), 1.01 (d,  $J$  = 6.8 Hz, 6H).

Following general procedure A, a mixture of 2'-iodo-2,4,6-triisopropylbiphenyl (300 mg, 0.73 mmol) in THF (3 mL) was treated with *t*-BuLi (880  $\mu\text{L}$ , 1.7 M in pentane, 1.49 mmol), CuCl (73 mg, 0.73 mmol), and (3,5-bisCF<sub>3</sub>Ph)<sub>2</sub>PCl (353 mg, 0.72 mmol). The crude product was crystallized from acetone (247 mg, 46%): mp 125–126 °C;  $^1\text{H}$  NMR (400 MHz,  $\text{CDCl}_3$ )  $\delta$ : 7.85 (s, 2H), 7.56–7.52 (m, 5H), 7.44 (t,  $J$  = 7.6 Hz, 1H), 7.33 (t,  $J$  = 5.2 Hz, 1H), 7.14 (dd,  $J$  = 7.6, 3.6 Hz, 1H), 6.99 (s, 2H), 2.94 (septet,  $J$  = 6.8 Hz, 1H), 2.26 (septet,  $J$  = 6.8 Hz, 2H), 1.29 (d,  $J$  = 6.8 Hz, 6H), 0.98 (d,  $J$  = 6.8 Hz, 6H), 0.80 (d,  $J$  = 6.8 Hz, 6H);  $^{13}\text{C}$  NMR (100 MHz,  $\text{CDCl}_3$ )  $\delta$ : 149.0, 148.6, 148.3, 146.20, 146.19, 140.4, 140.2, 134.8, 134.7, 134.51, 134.49, 133.0, 132.7, 132.6, 132.5, 132.24, 132.19, 131.91, 131.85, 131.7, 131.6, 131.5, 130.6, 128.2, 127.0, 124.3, 123.0, 122.91, 122.88, 121.6, 120.7, 34.1, 30.8, 25.4, 24.0, 22.12, 22.10 (Observed complexity due to P–C and C–F splitting);  $^{31}\text{P}$  NMR (161 MHz,  $\text{CDCl}_3$ )  $\delta$ : -15.9;  $^{19}\text{F}$  NMR (376 MHz,  $\text{CDCl}_3$ )  $\delta$ :

<sup>3</sup> Hartmann, N.; Niemeyer, M. *Synthetic Commun.* **2001**, *31*, 3839.

-63.0–(-63.2); IR (thin film) 2964, 2361, 1278  $\text{cm}^{-1}$ ; Anal. Calcd. for  $\text{C}_{37}\text{H}_{33}\text{F}_{12}\text{P}$ : C, 60.33; H, 4.52. Found: C, 60.49; H, 4.58.

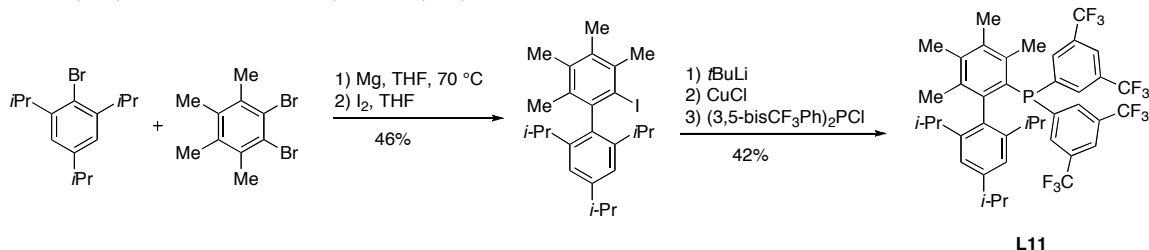

L11

**bis(3,5-bis(trifluoromethyl)phenyl)(2',4',6'-triisopropyl-3,4,5,6-tetramethylbiphenyl-2-yl)phosphine (L8)**. An oven-dried 100 mL round bottom flask equipped with a magnetic stir bar was charged with magnesium shavings (0.55 g, 23 mmol) and fitted with a reflux condenser. The flask was purged with argon and then THF (12 mL) and 2,4,6-triisopropylbromobenzene (2.53 mL, 10 mmol) were added via syringe. The reaction mixture was heated to reflux and 1,2-dibromomethane (50  $\mu\text{L}$ ) was added via syringe. The reaction mixture heated to reflux for 1 h, then 1,2-dibromo-3,4,5,6-tetramethylbenzene (2.92 g, 10 mmol) was added portionwise. After an additional 1 h at reflux the reaction mixture was cooled to rt and a solution of  $\text{I}_2$  (2.5 g, 10 mmol) in THF (10 mL) was added via cannula until a deep purple color persisted. The reaction mixture was then quenched with MeOH and filtered. The filtrate was then washed with  $\text{Na}_2\text{S}_2\text{O}_3$  and brine, then dried over  $\text{Na}_2\text{SO}_4$ , filtered and concentrated. The resulting solid was crystallized from acetone to yield a white powder (2.1 g, 46%):  $^1\text{H}$  NMR (400 MHz,  $\text{CDCl}_3$ )  $\delta$ : 7.03 (s, 2H), 2.95 (septet,  $J = 7.2$  Hz, 1H), 2.58 (s, 3H), 2.38–2.32 (m, 4H), 2.18 (s, 3H), 1.98 (s, 3H), 1.30 (d,  $J = 6.8$  Hz, 6H), 1.19 (d,  $J = 6.8$  Hz, 6H), 0.99 (d,  $J = 6.8$  Hz, 6H).

Following general procedure A, a mixture of 2-iodo-2',4',6'-triisopropyl-3,4,5,6-tetramethylbiphenyl (300 mg, 0.64 mmol) in THF (3 mL) was treated with *t*-BuLi (780  $\mu\text{L}$ , 1.7 M in pentane, 1.33 mmol), CuI (121 mg, 0.64 mmol), and (3,5-bis $\text{CF}_3$ Ph) $_2$ PCl (314 mg, 0.64 mmol). The crude product was crystallized from acetone (206 mg, 42%): mp 189–190  $^\circ\text{C}$ ;  $^1\text{H}$  NMR (400 MHz,  $\text{CDCl}_3$ )  $\delta$ : 7.66 (d,  $J = 4.4$  Hz, 4H), 7.60 (s, 2H), 7.16 (s, 2H), 2.81 (septet,  $J = 6.8$  Hz, 1H), 2.66 (septet,  $J = 6.8$  Hz, H), 1.91 (s, 3H), 1.86 (s, 3H), 1.78 (s, 3H), 1.71 (s, 3H), 1.21 (d,  $J = 6.8$  Hz, 6H), 1.13 (d,  $J = 6.8$  Hz, 6H), 0.89 (d,  $J = 7.2$  Hz, 6H);  $^{13}\text{C}$  NMR (100 MHz,  $\text{CDCl}_3$ )  $\delta$ : 148.2, 147.9, 147.4, 145.9, 145.8, 141.3, 141.0, 140.8, 138.9, 138.8, 136.9, 136.8, 135.1, 135.0, 131.9, 131.8, 131.54, 131.51, 130.4, 130.3, 126.41, 126.4, 124.5, 121.8, 121.4, 120.9, 34.0, 30.7, 34.8, 24.0, 23.2, 22.9, 19.70, 19.66, 17.6, 17.1 (Observed complexity due to P–C and C–F splitting);  $^{31}\text{P}$  NMR (161 MHz,  $\text{CDCl}_3$ )  $\delta$ : -9.50;  $^{19}\text{F}$  NMR (376 MHz,  $\text{CDCl}_3$ )  $\delta$ : -63.1–(-63.3); IR (thin film) 2963, 1277  $\text{cm}^{-1}$ ; Anal. Calcd. for  $\text{C}_{41}\text{H}_{41}\text{F}_{12}\text{P}$ : C, 62.12; H, 5.21. Found: C, 62.03; H, 5.19.

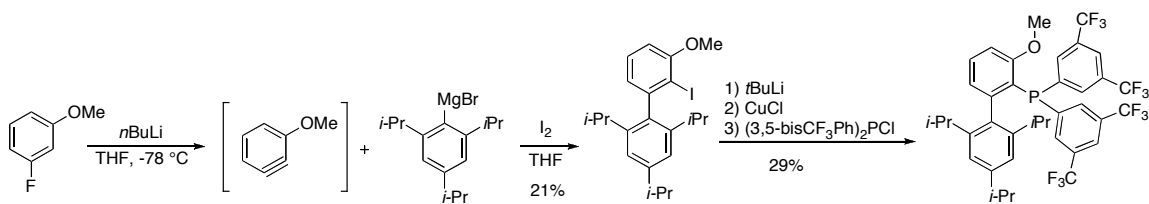

L12

**bis(3,5-bis(trifluoromethyl)phenyl)(2',4',6'-triisopropyl-3-methoxybiphenyl)phosphine (L9).** An oven-dried 500 mL bottom flask equipped with a magnetic stir bar was charged with magnesium shavings (750 mg, 31.2 mmol) and fitted with a reflux condenser. The flask was purged with argon and then THF (35 mL) and 2,4,6-triisopropylbromobenzene (6.5 mL, 26 mmol) were added via syringe. The reaction mixture was heated to reflux and 1,2-dibromethane (50  $\mu$ L) was added via syringe. The reaction mixture was allowed to stir at reflux for 1 h and was then cooled to room temperature. A separate oven-dried 1 L round bottom flask equipped with a magnetic stir bar was purged with argon and THF (320 mL) and 3-fluoroanisole (1.5 mL, 13 mmol) were added to the flask via syringe. The reaction vessel was cooled to -78 °C and *n*-BuLi (2.5 M in hexane, 13.7 mL, 1.05 mmol) was added dropwise. The solution was stirred for an additional 30 min and the Grignard reagent, which was prepared in the first reaction vessel, was added via cannula and the reaction was allowed to warm to rt overnight. A solution of iodine (6.5 g, 26 mmol) in THF (10 mL) was added cannula until a deep purple color persisted. The solvent was removed *in vacuo* and the remaining dark brown oil was taken up in CH<sub>2</sub>Cl<sub>2</sub>, washed with a saturated solution of sodium sulfite, and then brine. The organic layer was then dried over Na<sub>2</sub>SO<sub>4</sub>, filtered, and the solvent was removed *in vacuo*. The crude material was recrystallized from MeOH/EtOAc to yield the product as white crystals (1.2 g, 21%): <sup>1</sup>H NMR (400 MHz, CDCl<sub>3</sub>)  $\delta$ : 7.31 (t, *J* = 8.4 Hz, 1H), 7.04 (s, 2H), 6.82 (dd, *J* = 7.6, 1.6 Hz, 1H), 6.78 (dd, *J* = 8.0, 1.2 Hz, 1H), 3.95 (s, 3H), 2.95 (septet, *J* = 6.8 Hz, 1H), 2.40 (septet, *J* = 6.8 Hz, 2H), 1.30 (d, *J* = 7.2 Hz, 6H), 1.19 (d, *J* = 6.8 Hz, 6H), 1.01 (d, *J* = 6.8 Hz, 6H).

Following general procedure A, a mixture of 2-iodo-2',4',6'-triisopropyl-3-methoxybiphenyl (400 mg, 0.91 mmol) in THF (5 mL) was treated with *n*-BuLi (382  $\mu$ L, 2.5 M in hexane, 0.95 mmol), CuI (90 mg, 0.91 mmol), and (3,5-bis(trifluoromethyl)phenyl)<sub>2</sub>PCl (450 mg, 0.91 mmol). The crude product was crystallized from MeOH (224 mg, 29%): mp 113–115 °C; <sup>1</sup>H NMR (400 MHz, CDCl<sub>3</sub>)  $\delta$ : 7.93 (d, *J* = 5.2 Hz, 4H), 7.83 (s, 2H), 7.39 (s, 2H), 7.20 (t, *J* = 7.2 Hz, 1H), 7.06 (ddd, *J* = 7.6, 4.8, 0.8 Hz, 1H), 6.40 (d, *J* = 8.4 Hz, 1H) 3.04–2.98 (m, 4H), 2.89 (septet, *J* = 6.8 Hz, 2H), 1.42 (d, *J* = 6.8, 6H), 1.34 (d, *J* = 6.8 Hz, 12H); <sup>13</sup>C NMR (100 MHz, CDCl<sub>3</sub>)  $\delta$ : 161.71, 161.68, 152.0, 151.6, 149.3, 146.48, 146.46, 140.9, 140.7, 136.7, 136.6, 133.4, 132.4, 131.63, 131.58, 131.30, 131.25, 128.3, 128.2, 128.1, 128.0, 127.9, 127.8, 125.1, 124.7, 122.4, 121.0, 110.6, 54.1, 34.7, 31.3, 25.7, 24.2, 22.9 (Observed complexity due to P–C and C–F splitting); <sup>31</sup>P NMR (161 MHz, CDCl<sub>3</sub>)  $\delta$ : -15.9; <sup>19</sup>F NMR (376 MHz, CDCl<sub>3</sub>)  $\delta$ : -63.0–(-63.2); IR (thin film) 2963, 1277 cm<sup>-1</sup>; Anal. Calcd. for C<sub>38</sub>H<sub>35</sub>F<sub>12</sub>OP: C, 59.53; H, 4.60. Found: C, 59.34; H, 4.57.

## Experimental Procedures for Table 1

**General procedure D:** An oven-dried test tube fitted with a teflon septum and magnetic stir bar was charged with  $\text{K}_2\text{CO}_3$  (276 mg, 2.0 mmol) and 3 Å mol sieves (200 mg). The powder was flame-dried under vacuum to activate the molecular sieves and remove trace water. The vessel was then charged with **L6** (40 mg, 5 mol%) and  $[\text{Pd}(\text{allyl})\text{Cl}]_2$  (3.6 mg, 2 mol%). Next, the aryl nonaflate/triflate (1.0 mmol), amide (2.5 mmol), and toluene (4 mL) were added via syringe (aryl nonaflates/triflates or amides that were solids were added with the ligand and  $[\text{Pd}]$ ). The solution was heated to 110 °C for 17 h, cooled to room temperature, diluted with ethyl acetate, filtered through celite, concentrated *in vacuo* and purified by column chromatography.

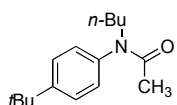

**N-butyl-N-(4-tert-butylphenyl)acetamide** (Table 1, Entry 1) Following general procedure D, a mixture of *N*-butyl acetamide (268 mg, 2.5 mmol), 4-*t*-butylphenyl nonaflate<sup>4</sup> (432 mg, 1.0 mmol),  $\text{K}_2\text{CO}_3$  (192 mg, 14 mmol), **L6** (40 mg, 5 mol%),  $[\text{Pd}(\text{allyl})\text{Cl}]_2$  (3.6 mg, 2 mol%), and toluene (4 mL) was heated to 110 °C for 17 h. The crude product was purified using a Biotage SP4 (silica-packed 25M; 6-40% EtOAc/hexanes) to provide the title compound as an oil (199 mg, 86%): <sup>1</sup>H NMR (400 MHz,  $\text{CDCl}_3$ )  $\delta$ : 7.40 (d,  $J = 6.4$  Hz, 2H), 7.06 (d,  $J = 6.4$  Hz, 2H), 3.66 (t,  $J = 7.6$  Hz, 2H), 1.81 (s, 3H), 1.5–1.45 (m, 2H), 1.36–1.27 (m, 11H), 0.88 (t,  $J = 7.2$  Hz, 3H); <sup>13</sup>C NMR (100 MHz,  $\text{CDCl}_3$ )  $\delta$ : 170.3, 150.7, 140.4, 127.4, 126.4, 48.7, 34.5, 31.3, 29.8, 22.8, 20.0, 13.8; IR (thin film) 2961, 1663, 1511  $\text{cm}^{-1}$ ; Anal. Calcd. for  $\text{C}_{16}\text{H}_{25}\text{NO}$ : C, 77.68; H, 10.19; N, 5.66. Found: C, 77.39; H, 10.30; N, 5.74.

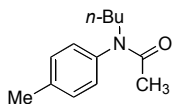

**N-butyl-N-*p*-tolylacetamide** (Table 1, Entry 2) Following general procedure D, a mixture of *N*-butyl acetamide (268 mg, 2.5 mmol), 4-methylphenyl nonaflate<sup>5</sup> (390 mg, 1.0 mmol),  $\text{K}_2\text{CO}_3$  (276 mg, 2.0 mmol), **L6** (40 mg, 5 mol%),  $[\text{Pd}(\text{allyl})\text{Cl}]_2$  (3.6 mg, 2 mol%), and toluene (4 mL) was heated to 110 °C for 17 h. The crude product was purified using a Biotage SP4 (silica-packed 25M; 2-40% EtOAc/hexanes) to provide the title compound as an oil (167 mg, 82%): <sup>1</sup>H NMR (400 MHz,  $\text{CDCl}_3$ )  $\delta$ : 7.20 (d,  $J = 8.4$  Hz, 2H), 7.03 (d,  $J = 8.8$  Hz, 2H), 3.65 (t,  $J = 7.6$  Hz, 2H), 2.38 (s, 3H), 1.81 (s, 3H), 1.48–1.43 (m, 2H), 1.32–1.26 (m, 2H), 0.87 (t,  $J = 7.2$  Hz, 3H); <sup>13</sup>C NMR (100 MHz,  $\text{CDCl}_3$ )  $\delta$ : 170.2, 140.5, 137.6, 130.1, 127.8, 48.7, 29.8, 22.7, 21.0, 20.0, 13.7; IR (thin film) 1653, 1506  $\text{cm}^{-1}$ ; Anal. Calcd. for  $\text{C}_{13}\text{H}_{19}\text{NO}$ : C, 76.06; H, 9.33. Found: C, 75.78; H, 9.34.

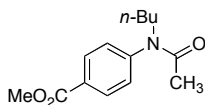

**Methyl 4-(*N*-butylacetamido)benzoate** (Table 1, Entry 3) Following general procedure D, a mixture of *N*-butyl acetamide (268 mg, 2.5 mmol), methyl 4-(perfluorobutylsulfonyloxy)benzoate<sup>4</sup> (434 mg, 1.0 mmol),  $\text{K}_2\text{CO}_3$  (276 mg, 2.0 mmol), **L6** (40 mg, 5 mol%),  $[\text{Pd}(\text{allyl})\text{Cl}]_2$  (3.6 mg, 2 mol%), and toluene (4 mL) was heated to 110 °C for 17 h. The crude product was purified using a Biotage SP4 (silica-packed 25M; 4-50% EtOAc/hexanes) to provide the

<sup>4</sup> Anderson, K. W.; Mendez-Perez, M.; Priego, J.; Buchwald, S. L. *J. Org. Chem.* **2003**, *68*, 9563.

<sup>5</sup> Meadows, R. E.; Woodward, S. *Tetrahedron* **2008**, *64*, 1218.

title compound as an oil (219 mg, 88%):  $^1\text{H}$  NMR (400 MHz,  $\text{CDCl}_3$ )  $\delta$ : 8.09 (d,  $J = 8.4$  Hz, 2H), 7.24 (d,  $J = 8.4$  Hz, 2H), 3.93 (s, 3H), 3.71 (t,  $J = 7.6$  Hz, 2H), 1.85 (br s, 3H), 1.46 (pentet,  $J = 8.0$  Hz, 2H), 1.29 (sextet,  $J = 7.2$  Hz, 2H), 0.87 (t,  $J = 7.2$  Hz, 3H);  $^{13}\text{C}$  NMR (100 MHz,  $\text{CDCl}_3$ )  $\delta$ : 169.5, 166.1, 147.2, 130.9, 129.3, 127.9, 52.2, 48.7, 29.8, 22.8, 19.9, 13.6; IR (thin film) 2931, 1718, 1653  $\text{cm}^{-1}$ ; Anal. Calcd. for  $\text{C}_{14}\text{H}_{19}\text{NO}_3$ : C, 67.45; H, 7.68; N, 5.62. Found: C, 67.43; H, 7.77; N, 5.58.

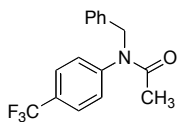

***N*-benzyl-*N*-(4-(trifluoromethyl)phenyl)acetamide** (Table 1, Entry 4)

An oven-dried test tube, equipped with a magnetic stir bar and fitted with a teflon septum, was charged with  $\text{Pd}(\text{OAc})_2$  (4.4 mg, 2 mol%) and **L6** (40 mg, 5 mol%). The vessel was evacuated and backfilled with argon (this process was repeated a total of three times) and the toluene (4 mL) and degassed  $\text{H}_2\text{O}$  (8 mol%) were added via syringe. After addition of the water, the solution was heated to 110  $^\circ\text{C}$  for 1 min. A second oven-dried test tube fitted with a teflon septum and magnetic stir bar was charged with  $\text{K}_2\text{CO}_3$  (276 mg, 2.0 mmol) and 3 Å mol sieves (200 mg). The powder was flame-dried under vacuum to activate the molecular sieves and remove trace water. *N*-benzylacetamide (372 mg, 2.5 mmol), 4-(trifluoromethyl)phenyl 1,1,2,2,3,3,4,4,4-nonafluorobutane-1-sulfonate<sup>6</sup> (444 mg, 1.0 mmol), and a solution of the catalyst prepared above were added via syringe. The solution was heated to 110  $^\circ\text{C}$  for 17 h, cooled to room temperature, diluted with ethyl acetate, filtered through celite and concentrated *in vacuo*. The crude product was purified using a Biotage SP4 (silica-packed 25M; 10-50% EtOAc/hexanes) to provide the title compound as a tan solid (240 mg, 82%): mp 78–80  $^\circ\text{C}$ ;  $^1\text{H}$  NMR (400 MHz,  $\text{CDCl}_3$ )  $\delta$ : 7.60 (d,  $J = 8.0$  Hz, 2H), 7.28–7.26 (m, 3H), 7.19–7.11 (m, 4H), 4.91 (d, 2H), 1.91 (br s, 3H);  $^{13}\text{C}$  NMR (100 MHz,  $\text{CDCl}_3$ )  $\delta$ : 146.0, 136.9, 128.6, 128.5, 127.6, 126.7, 125.0, 122.3, 52.7, 22.8;  $^{19}\text{F}$  NMR (376 MHz,  $\text{CDCl}_3$ )  $\delta$ : -62.7; IR (thin film) 1655, 1559, 1272  $\text{cm}^{-1}$ ; Anal. Calcd. for  $\text{C}_{16}\text{H}_{14}\text{F}_3\text{NO}$ : C, 65.52; H, 4.81. Found: C, 65.32; H, 4.83.

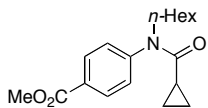

**Methyl 4-(*N*-hexylcyclopropanecarboxamido)benzoate** (Table 1, Entry 5)

Following general procedure D, a mixture of *N*-hexylcyclopropanecarboxamide (423 mg, 2.5 mmol), methyl 4-(perfluorobutylsulfonyloxy)benzoate<sup>4</sup> (434 mg, 1.0 mmol),  $\text{K}_2\text{CO}_3$  (276 mg, 2.0 mmol), **L6** (40 mg, 5 mol%),  $[\text{Pd}(\text{allyl})\text{Cl}]_2$  (3.6 mg, 2 mol%), and toluene (4 mL) was heated to 110  $^\circ\text{C}$  for 17 h. The crude product was purified using a Biotage SP4 (silica-packed 25M; 4-50% EtOAc/hexanes) to provide the title compound as an oil (247 mg, 82%):  $^1\text{H}$  NMR (400 MHz,  $\text{CDCl}_3$ )  $\delta$ : 8.09 (d,  $J = 6.4$  Hz, 2H), 7.33 (d,  $J = 6.8$  Hz, 2H), 3.94 (s, 3H), 3.73 (t,  $J = 8.0$  Hz, 2H), 1.50–1.46 (m, 2H), 1.29–1.23 (m, 7H), 1.04–1.23 (m, 2H), 0.84 (t,  $J = 7.2$  Hz, 3H), 0.64–0.61 (m, 2H);  $^{13}\text{C}$  NMR (100 MHz,  $\text{CDCl}_3$ )  $\delta$ : 172.8, 166.2, 147.1, 130.8, 128.9, 128.0, 52.2, 49.4, 31.4, 27.8, 26.4, 22.4, 13.9, 13.0, 8.6; IR (thin film) 1750, 1654, 1604  $\text{cm}^{-1}$ ; Anal. Calcd. for  $\text{C}_{18}\text{H}_{25}\text{NO}_3$ : C, 71.26; H, 8.31; N, 4.62. Found: C, 71.13; H, 8.22; N, 4.60.

<sup>6</sup> Prepared via general procedure G. Niederpruem, H.; Voss, P.; Beyl, V. *Justus Liebigs Annalen der Chemie* **1973**, 20.

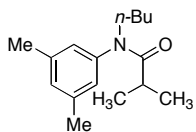

***N*-butyl-*N*-(3,5-dimethylphenyl)isobutyramide** (Table 1, Entry 6) An oven-dried test tube, equipped with a magnetic stir bar and fitted with a teflon septum, was charged with Pd(OAc)<sub>2</sub> (4.4 mg, 2 mol%) and **L6** (40 mg, 5 mol%). The vessel was evacuated and backfilled with argon (this process was repeated a total of three times) and the toluene (4 mL) and degassed H<sub>2</sub>O (8 mol%) were added via syringe. After addition of the water, the solution was heated to 110 °C for 1 min. A second oven-dried test tube fitted with a teflon septum and magnetic stir bar was charged with K<sub>2</sub>CO<sub>3</sub> (276 mg, 2.0 mmol) and 3 Å mol sieves (200 mg). The powder was flame-dried under vacuum to activate the molecular sieves and remove trace water. *N*-butylisobutyramide (358 mg, 2.5 mmol), 3,5-dimethylphenyl 1,1,2,2,3,3,4,4,4-nonafluorobutane-1-sulfonate (404 mg, 1.0 mmol), and a solution of the catalyst prepared above were added via syringe. The solution was heated to 110 °C for 17 h, cooled to room temperature, diluted with ethyl acetate, filtered through celite and concentrated *in vacuo*. The crude product was purified using a Biotage SP4 (silica-packed 25M; 10-50% EtOAc/hexanes) to provide the title compound as an oil (194 mg, 78%): <sup>1</sup>H NMR (400 MHz, CDCl<sub>3</sub>) δ: 6.97 (s, 1H), 6.75 (s, 2H), 3.62 (t, *J* = 7.6 Hz, 2H), 2.43 (septet, *J* = 6.4 Hz, 1H), 2.33 (s, 6H), 1.48–1.45 (m, 2H), 1.29 (sextet, *J* = 7.2 Hz, 2H), 1.00 (d, *J* = 6.4 Hz, 6H), 0.89 (t, *J* = 7.6 Hz, 3H); <sup>13</sup>C NMR (100 MHz, CDCl<sub>3</sub>) δ: 177.0, 142.7, 139.2, 129.3, 125.8, 49.0, 31.2, 29.9, 21.2, 20.0, 19.7, 13.8; IR (thin film) 2962, 1660 cm<sup>-1</sup>; Anal. Calcd. for C<sub>18</sub>H<sub>25</sub>NO<sub>3</sub>: C, 77.68; H, 10.19. Found: C, 77.47; H, 9.99.

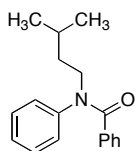

***N*-isopentyl-*N*-phenylbenzamide** (Table 1, Entry 7) Following general procedure D, a mixture of *N*-isopentylbenzamide (478 mg, 2.5 mmol), phenyl trifluoromethanesulfonate (163 mg, 1.0 mmol), K<sub>2</sub>CO<sub>3</sub> (276 mg, 2.0 mmol), **L6** (40 mg, 5 mol%), [Pd(allyl)Cl]<sub>2</sub> (3.6 mg, 2 mol%), and toluene (4 mL) was heated to 110 °C for 17 h. The crude product was purified using a Biotage SP4 (silica-packed 25M; 5-40% EtOAc/hexanes) to provide the title compound as a white solid (206 mg, 77%): mp 54–55 °C; <sup>1</sup>H NMR (400 MHz, CDCl<sub>3</sub>) δ: 7.27 (d, *J* = 7.2 Hz, 2H), 7.23–7.18 (m, 3H), 7.16–7.11 (m, 3H), 7.01 (d, *J* = 7.6 Hz, 2H), 3.93 (t, *J* = 8.0 Hz, 2H), 1.63 (septet, *J* = 6.8 Hz, 1H), 1.55–1.49 (m, 2H), 0.90 (d, *J* = 6.8 Hz, 6H); <sup>13</sup>C NMR (100 MHz, CDCl<sub>3</sub>) δ: 170.1, 143.4, 136.3, 129.3, 129.0, 128.5, 127.7, 127.6, 126.4, 48.9, 36.3, 26.1, 22.5; IR (thin film) 2956, 1645, 1493 cm<sup>-1</sup>.

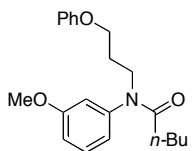

***N*-(3-methoxyphenyl)-*N*-(3-phenoxypropyl)pentanamide** (Table 1, Entry 8) Following general procedure D, a mixture of *N*-(3-phenoxypropyl)pentanamide (587 mg, 2.5 mmol), 3-methoxyphenyl trifluoromethanesulfonate<sup>7</sup> (356 mg, 1.0 mmol), K<sub>2</sub>CO<sub>3</sub> (276 mg, 2.0 mmol), **L6** (40 mg, 5 mol%), [Pd(allyl)Cl]<sub>2</sub> (3.6 mg, 2 mol%), and toluene (4 mL) was heated to 110 °C for 17 h. The crude product was purified using a Biotage SP4 (silica-packed 25M; 5-40% EtOAc/hexanes) to provide the title compound as an oil (259 mg, 76%): <sup>1</sup>H NMR (300 MHz, CDCl<sub>3</sub>) δ: 7.30–7.16 (m, 3H), 6.87 (t, *J* = 7.3 Hz, 2H), 6.80 (d, *J* = 8.0 Hz, 2H), 6.72–6.64 (m, 2H), 3.90 (t, *J* = 6.0 Hz, 2H), 3.74

<sup>7</sup> Lee, D.-Y.; Hartwig, J. F. *Org. Lett.* **2005**, *7*, 1169.

(s, 3H), 3.71–3.64 (m, 2H), 2.25 (t,  $J = 7.1$  Hz, 2H), 2.12–2.00 (m, 2H), 1.54–1.52 (m, 2H), 1.32–1.25 (m, 2H), 0.87 (t,  $J = 7.2$  Hz, 3H);  $^{13}\text{C}$  NMR (75 MHz,  $\text{CDCl}_3$ )  $\delta$ : 171.7, 160.2, 158.6, 143.5, 130.1, 129.1, 120.4, 120.2, 114.2, 113.8, 112.9, 66.5, 55.1, 48.7, 30.5, 29.7, 24.9, 19.8, 13.6; IR (thin film) 2931, 2863, 1653, 1601, 1456, 1404, 1288, 1245, 1047, 754, 692  $\text{cm}^{-1}$ ; Anal. Calcd. for  $\text{C}_{21}\text{H}_{27}\text{NO}_3$ : C, 73.87; H, 7.97. Found: C, 73.82; H, 8.12.

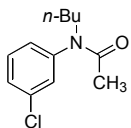

***N*-butyl-*N*-(3-chlorophenyl)acetamide** (Table 1, Entry 9) Following general procedure D, a mixture of *N*-butyl acetamide (268 mg, 2.5 mmol), 3-chlorophenyl 1,1,2,2,3,3,4,4,4-nonafluorobutane-1-sulfonate (410 mg, 1.0 mmol),  $\text{K}_2\text{CO}_3$  (276 mg, 2.0 mmol), **L6** (40 mg, 5 mol%),  $[\text{Pd}(\text{allyl})\text{Cl}]_2$  (3.6 mg, 2 mol%), and toluene (4 mL) was heated to 110  $^\circ\text{C}$  for 17 h. The crude product was purified using a Biotage SP4 (silica-packed 25M; 5-40% EtOAc/hexanes) to provide the title compound as an oil (155 mg, 69%):  $^1\text{H}$  NMR (300 MHz,  $\text{CDCl}_3$ )  $\delta$ : 7.30–7.16 (m, 2H), 7.10–7.06 (m, 1H), 7.00–6.94 (m, 1H), 3.60–3.52 (m, 2H), 1.73 (s, 3H), 1.42–1.30 (m, 2H), 1.22–1.14 (m, 2H), 0.76 (t,  $J = 7.2$  Hz, 3H);  $^{13}\text{C}$  NMR (75 MHz,  $\text{CDCl}_3$ )  $\delta$ : 169.4, 144.1, 134.7, 130.3, 128.0, 127.8, 126.2, 48.5, 29.5, 22.5, 19.7, 13.5; IR (thin film) 2931, 1710, 1590, 1473, 1394, 1301  $\text{cm}^{-1}$ .

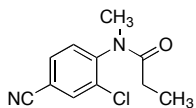

***N*-(2-chloro-4-cyanophenyl)-*N*-methylpropionamide** (Table 1, Entry 10) Following general procedure D, a mixture of *N*-methylpropionamide (216 mg, 2.5 mmol), 2-chloro-4-cyanophenyl 1,1,2,2,3,3,4,4,4-nonafluorobutane-1-sulfonate (436 mg, 1.0 mmol),  $\text{K}_2\text{CO}_3$  (276 mg, 2.0 mmol), **L6** (40 mg, 5 mol%),  $[\text{Pd}(\text{allyl})\text{Cl}]_2$  (3.6 mg, 2 mol%), and toluene (4 mL) was heated to 110  $^\circ\text{C}$  for 17 h. The crude product was purified using a Biotage SP4 (silica-packed 25M; 4-50% EtOAc/hexanes) to provide the title compound as an oil (153 mg, 70%):  $^1\text{H}$  NMR (400 MHz,  $\text{CDCl}_3$ )  $\delta$ : 7.81 (d,  $J = 2.0$  Hz, 1H), 7.64 (dd,  $J = 8.0, 2.0$  Hz, 1H), 7.40 (d,  $J = 8.0$  Hz, 1H), 3.17 (s, 3H), 1.97–1.91 (m, 2H), 1.03 (t,  $J = 7.6$  Hz, 3H);  $^{13}\text{C}$  NMR (100 MHz,  $\text{CDCl}_3$ )  $\delta$ : 172.9, 145.6, 134.5, 134.2, 132.0, 130.9, 116.6, 113.5, 35.6, 30.2, 27.4; IR (thin film) 2985, 1683, 1388  $\text{cm}^{-1}$ ; Anal. Calcd. for  $\text{C}_{11}\text{H}_{11}\text{ClN}_2\text{O}$ : C, 59.33; H, 4.98. Found: C, 59.56; H, 5.00.

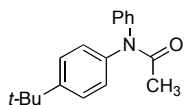

***N*-(4-*tert*-butylphenyl)-*N*-phenylacetamide** (Table 1, Entry 11) Following general procedure D, a mixture of *N*-phenylacetamide (336 mg, 2.5 mmol), 4-*t*-butylphenyl nonaflate<sup>4</sup> (432 mg, 1.0 mmol),  $\text{K}_3\text{PO}_4$  (424 mg, 2.0 mmol), **L6** (40 mg, 5 mol%),  $[\text{Pd}(\text{allyl})\text{Cl}]_2$  (3.6 mg, 2 mol%), and toluene (4 mL) was heated to 110  $^\circ\text{C}$  for 17 h. The crude product was purified using a Biotage SP4 (silica-packed 25M; 4-50% EtOAc/hexanes) to provide the title compound as a white solid (209 mg, 78%): mp 108  $^\circ\text{C}$ ;  $^1\text{H}$  NMR (400 MHz,  $\text{CDCl}_3$ )  $\delta$ : 7.37–7.26 (m, 7H), 7.18 (d,  $J = 6.4$  Hz, 2H), 2.06 (s, 3H), 1.30 (br s, 9H);  $^{13}\text{C}$  NMR (100 MHz,  $\text{CDCl}_3$ )  $\delta$ : 170.3, 129.4, 128.6, 128.2, 127.6, 126.3, 125.6, 34.3, 31.3, 23.6; IR (thin film) 2962, 1669, 1371  $\text{cm}^{-1}$ .



## Experimental Procedures for Table 2

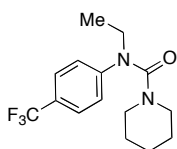

***N*-ethyl-*N*-(4-(trifluoromethyl)phenyl)piperidine-1-carboxamide** (Table 2, Entry 1) Following general procedure D, a mixture of *N*-ethylpiperidine-1-carboxamide (390 mg, 2.5 mmol), 4-(trifluoromethyl)phenyl 1,1,2,2,3,3,4,4,4-nonafluorobutane-1-sulfonate<sup>6</sup> (444 mg, 1.0 mmol), K<sub>2</sub>CO<sub>3</sub> (276 mg, 2.0 mmol), **L6** (40 mg, 5 mol%), [Pd(allyl)Cl]<sub>2</sub> (3.6 mg, 2 mol%), and toluene (4 mL) was heated to 110 °C for 17 h. The crude product was purified using a Biotage SP4 (silica-packed 25M; 7-70% EtOAc/hexanes) to provide the title compound as a oil (192 mg, 64%): <sup>1</sup>H NMR (400 MHz, CDCl<sub>3</sub>) δ: 7.55 (d, *J* = 8.4 Hz, 2H), 7.10 (d, *J* = 8.0 Hz, 2H), 3.73 (q, *J* = 6.8 Hz, 2H), 3.17 (t, *J* = 5.6 Hz, 4H), 1.52–1.48 (m, 2H), 1.42–1.36 (m, 4H), 1.16 (t, *J* = 7.2 Hz, 3H); <sup>13</sup>C NMR (100 MHz, CDCl<sub>3</sub>) δ: 159.9, 148.5, 126.5, 126.42, 126.38, 126.3, 125.5, 125.2, 124.9, 122.8, 122.4, 46.6, 45.8, 25.4, 24.4, 13.9; <sup>19</sup>F NMR (376 MHz, CDCl<sub>3</sub>) δ: -62.6; IR (thin film) 2938, 1653, 1615, 1418 cm<sup>-1</sup>; Anal. Calcd. for C<sub>15</sub>H<sub>19</sub>F<sub>3</sub>N<sub>2</sub>O: C, 59.99; H, 6.38. Found: C, 60.12; H, 6.32.

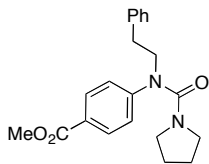

**methyl 4-(*N*-phenethylpyrrolidine-1-carboxamido)benzoate** (Table 2, Entry 2) Following general procedure D, a mixture of *N*-phenethylpyrrolidine-1-carboxamide (545 mg, 2.5 mmol), methyl 4-(perfluorobutylsulfonyloxy)benzoate<sup>4</sup> (434 mg, 1.0 mmol), K<sub>2</sub>CO<sub>3</sub> (276 mg, 2.0 mmol), **L6** (40 mg, 5 mol%), [Pd(allyl)Cl]<sub>2</sub> (3.6 mg, 2 mol%), and toluene (4 mL) was heated to 110 °C for 17 h. The crude product was purified using a Biotage SP4 (silica-packed 25M; 7-70% EtOAc/hexanes) to provide the title compound as an oil (211 mg, 60%): <sup>1</sup>H NMR (300 MHz, CDCl<sub>3</sub>) δ: 7.92 (d, *J* = 8.7 Hz, 2H), 7.28–7.12 (m, 5H), 6.94 (d, *J* = 8.7 Hz, 2H), 3.88 (t, *J* = 7.4 Hz, 2H), 3.86 (s, 3H), 3.08–2.98 (m, 4H), 2.94–2.85 (m, 2H), 1.70–1.63 (m, 4H); <sup>13</sup>C NMR (75 MHz, CDCl<sub>3</sub>) δ: 166.3, 158.2, 149.1, 139.2, 130.7, 128.8, 128.2, 126.1, 125.1, 123.1, 53.2, 51.9, 47.6, 34.9, 25.1; IR (thin film) 2957, 1717, 1653, 1603, 1558, 1496, 1399, 1279, 1173, 1105 cm<sup>-1</sup>; Anal. Calcd. for C<sub>21</sub>H<sub>24</sub>N<sub>2</sub>O: C, 71.57; H, 6.86. Found: C, 71.87; H, 6.88.

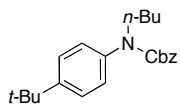

**benzyl butyl(4-*tert*-butylphenyl)carbamate** (Table 2, Entry 3) Following general procedure D, a mixture of benzyl butylcarbamate (518 mg, 2.5 mmol), 4-*t*-butylphenyl nonaflate<sup>4</sup> (432 mg, 1.0 mmol), K<sub>2</sub>CO<sub>3</sub> (276 mg, 2.0 mmol), **L6** (40 mg, 5 mol%), [Pd(allyl)Cl]<sub>2</sub> (3.6 mg, 2 mol%), and toluene (4 mL) was heated to 110 °C for 17 h. The crude product was purified using a Biotage SP4 (silica-packed 25M; 7-70% EtOAc/hexanes) to provide the title compound as an oil (335 mg, 98%): <sup>1</sup>H NMR (400 MHz, CDCl<sub>3</sub>) δ: 7.35 (d, *J* = 6.8 Hz, 2H), 7.35–7.20 (m, 5H), 7.10 (br s, 2H), 5.14 (s, 2H), 3.64 (t, *J* = 7.6 Hz, 2H), 1.57–1.48 (m, 2H), 1.33–1.25 (m, 11H), 0.88 (t, *J* = 7.2 Hz, 3H); <sup>13</sup>C NMR (100 MHz, CDCl<sub>3</sub>) δ: 155.4, 149.3 (br s), 139.1 (br s), 136.8, 128.2, 127.6, 127.3 (br s), 126.6 (br s), 125.7, 66.7 (br s), 50.2 (br s), 34.3, 31.2, 30.3 (br s), 19.7, 13.7; IR (thin film) 2960, 1700, 1516, 1296 cm<sup>-1</sup>; Anal. Calcd. for C<sub>22</sub>H<sub>29</sub>NO<sub>2</sub>: C, 77.84; H, 8.61. Found: C, 77.94; H, 8.42.

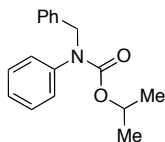

**isopropyl benzyl(phenyl)carbamate** (Table 2, Entry 4) Following general procedure D, a mixture of isopropyl benzylcarbamate (482 mg, 2.5 mmol), phenyl trifluoromethanesulfonate (163 mg, 1.0 mmol),  $K_2CO_3$  (276 mg, 2.0 mmol), **L6** (40 mg, 5 mol%),  $[Pd(allyl)Cl]_2$  (3.6 mg, 2 mol%), and toluene (4 mL) was heated to 110 °C for 17 h. The crude product was purified using a Biotage SP4 (silica-packed 25M; 7-70% EtOAc/hexanes) to provide the title compound as an oil (239 mg, 88%):  $^1H$  NMR (300 MHz,  $CDCl_3$ )  $\delta$ : 7.37–7.15 (m, 10H), 5.08 (septet,  $J = 6.3$  Hz, 1H), 4.92 (s, 2H), 1.25 (d,  $J = 6.2$  Hz, 6H);  $^{13}C$  NMR (75 MHz,  $CDCl_3$ )  $\delta$ : 155.1, 142.1, 137.9, 128.4, 128.1, 127.3, 126.9, 126.4, 125.8, 68.9, 53.7, 21.7; IR (thin film) 3031, 2980, 2933, 1700, 1597, 1496, 1456, 1398, 1276, 1225, 1179, 1111, 1018, 697  $cm^{-1}$ ; Anal. Calcd. for  $C_{17}H_{19}NO_2$ : C, 75.81; H, 7.11. Found: C, 75.60; H, 7.22.

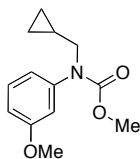

**methyl cyclopropylmethyl(3-methoxyphenyl)carbamate** (Table 2, Entry 5) Following general procedure D, a mixture of methyl cyclopropylmethylcarbamate (323 mg, 2.5 mmol), 3-methoxyphenyl trifluoromethanesulfonate<sup>7</sup> (256 mg, 1.0 mmol),  $K_2CO_3$  (276 mg, 2.0 mmol), **L6** (40 mg, 5 mol%),  $[Pd(allyl)Cl]_2$  (3.6 mg, 2 mol%), and toluene (4 mL) was heated to 110 °C for 17 h. The crude product was purified using a Biotage SP4 (silica-packed 25M; 7-70% EtOAc/hexanes) to provide the title compound as an oil (212 mg, 90%):  $^1H$  NMR (300 MHz,  $CDCl_3$ )  $\delta$ : 7.22 (t,  $J = 7.8$  Hz, 1H), 6.81–6.76 (m, 3H), 3.75 (s, 3H), 3.63 (s, 3H), 3.48 (d,  $J = 7.2$  Hz, 2H), 1.01–0.95 (m, 1H), 0.43–0.37 (m, 2H), 0.14–0.09 (m, 2H);  $^{13}C$  NMR (75 MHz,  $CDCl_3$ )  $\delta$ : 159.7, 155.8, 143.0, 129.3, 119.8, 113.5, 112.0, 55.0, 54.8, 52.5, 10.1, 3.3; IR (thin film) 2954, 1706, 1604, 1491  $cm^{-1}$ ; Anal. Calcd. for  $C_{13}H_{17}NO_3$ : C, 66.36; H, 7.28. Found: C, 66.55; H, 7.31.

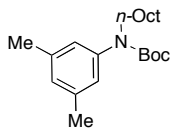

**tert-butyl 3,5-dimethylphenyl(octyl)carbamate** (Table 2, Entry 6) Following general procedure D, a mixture of *tert*-butyl octylcarbamate (572 mg, 2.5 mmol), 3,5-dimethylphenyl 1,1,2,2,3,3,4,4,4-nonafluorobutane-1-sulfonate (404 mg, 1.0 mmol),  $K_2CO_3$  (276 mg, 2.0 mmol), **L6** (40 mg, 5 mol%),  $[Pd(allyl)Cl]_2$  (3.6 mg, 2 mol%), and toluene (4 mL) was heated to 100 °C for 17 h. The crude product was purified using a Biotage SP4 (silica-packed 25M; 7-70% EtOAc/hexanes) to provide the title compound as an oil (289 mg, 87%):  $^1H$  NMR (400 MHz,  $CDCl_3$ )  $\delta$ : 6.83 (s, 1H), 6.80 (s, 2H), 3.55 (t,  $J = 7.6$  Hz, 2H), 2.30 (s, 6H), 1.52–1.50 (m, 2H), 1.44 (br s, 9H), 1.30–1.21 (m, 10 H), 0.87 (t,  $J = 6.8$  Hz, 3H);  $^{13}C$  NMR (100 MHz,  $CDCl_3$ )  $\delta$ : 154.8, 142.4, 138.1, 127.6, 124.8, 79.7, 50.1, 31.8, 29.2, 28.5, 28.3, 28.2, 26.7, 22.6, 21.2, 14.1; IR (thin film) 2926, 1699, 1599, 1456  $cm^{-1}$ ; Anal. Calcd. for  $C_{21}H_{35}NO_2$ : C, 75.63; H, 10.58. Found: C, 75.54; H, 10.42.

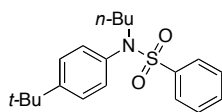

***N*-butyl-*N*-(4-*tert*-butylphenyl)benzenesulfonamide** (Table 2, Entry 7) Following general procedure D, a mixture of *N*-butylbenzenesulfonamide (463 mg, 2.5 mmol), 4-methylphenyl nonaflate<sup>4</sup> (390 mg, 1.0 mmol),  $K_2CO_3$  (276 mg, 2.0 mmol), **L6** (40

mg, 5 mol%), [Pd(allyl)Cl]<sub>2</sub> (3.6 mg, 2 mol%), and toluene (4 mL) was heated to 110 °C for 17 h. The crude product was purified using a Biotage SP4 (silica-packed 25M; 2-40% EtOAc/hexanes) to provide the title compound as a tan solid (327 mg, 95%): mp 53 °C; <sup>1</sup>H NMR (400 MHz, CDCl<sub>3</sub>) δ: 7.62–7.56 (m, 3H), 7.46 (t, *J* = 7.6 Hz, 2H), 7.30 (d, *J* = 8.4 Hz, 2H), 6.94 (d, *J* = 8.4 Hz, 2H), 3.50 (t, *J* = 7.2 Hz, 2H), 1.42–1.31(m, 4H), 1.30 (s, 9H), 0.86 (t, *J* = 7.2 Hz, 3H); <sup>13</sup>C NMR (100 MHz, CDCl<sub>3</sub>) δ: 150.8, 138.5, 136.2, 132.4, 128.6, 128.2, 127.6, 125.8, 50.4, 34.5, 31.3, 30.2, 19.5, 13.6; IR (thin film) 2961, 1507, 1349 cm<sup>-1</sup>; Anal. Calcd. for C<sub>20</sub>H<sub>27</sub>NO<sub>2</sub>S: C, 69.53; H, 7.88; N, 4.05. Found: C, 69.24; H, 7.86; N, 3.99.

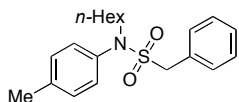

***N*-hexyl-1-phenyl-*N*-*p*-tolylmethanesulfonamide** (Table 2, Entry 8) Following general procedure D, a mixture of *N*-hexyl-1-phenylmethanesulfonamide (637 mg, 2.5 mmol), 4-*t*-butylphenyl nonaflate<sup>5</sup> (432 mg, 1.0 mmol), K<sub>2</sub>CO<sub>3</sub> (276 mg, 2.0 mmol), **L6** (40 mg, 5 mol%), [Pd(allyl)Cl]<sub>2</sub> (3.6 mg, 2 mol%), and toluene (4 mL) was heated to 110 °C for 17 h. The crude product was purified using a Biotage SP4 (silica-packed 25M; 2-20% EtOAc/hexanes) to provide the title compound as a tan solid (302 mg, 88%): mp 55 °C; <sup>1</sup>H NMR (400 MHz, CDCl<sub>3</sub>) δ: 7.44–7.41 (m, 2H), 7.39–7.37 (m, 3H), 7.18–7.13 (m, 4H), 4.23 (s, 2H), 3.40 (t, *J* = 6.8 Hz, 2H), 2.36 (s, 3H), 1.33–1.13 (m, 8H), 0.82 (t, *J* = 6.8 Hz, 3H); <sup>13</sup>C NMR (100 MHz, CDCl<sub>3</sub>) δ: 137.6, 136.2, 130.8, 129.9, 129.0, 128.7, 128.6, 56.7, 51.5, 31.3, 28.6, 25.9, 22.4, 21.0, 13.9; IR (thin film) 2971, 1539, 1495 cm<sup>-1</sup>; Anal. Calcd. for C<sub>20</sub>H<sub>27</sub>NO<sub>2</sub>S: C, 69.53; H, 7.88; N, 4.05. Found: C, 69.37; H, 7.93; N, 4.03.

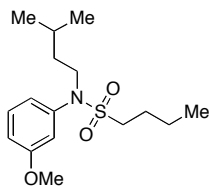

***N*-isopentyl-*N*-(3-methoxyphenyl)butane-1-sulfonamide** (Table 2, Entry 9) Following general procedure D, a mixture of *N*-isopentylbutane-1-sulfonamide (517 mg, 2.5 mmol), 3-methoxyphenyl trifluoromethanesulfonate<sup>7</sup> (256 mg, 1.0 mmol), K<sub>2</sub>CO<sub>3</sub> (276 mg, 2.0 mmol), **L6** (40 mg, 5 mol%), [Pd(allyl)Cl]<sub>2</sub> (3.6 mg, 2 mol%), and toluene (4 mL) was heated to 110 °C for 17 h. The crude product was purified using a Biotage SP4 (silica-packed 25M; 2-20% EtOAc/hexanes) to provide the title compound as an oil (286 mg, 91%): <sup>1</sup>H NMR (300 MHz, CDCl<sub>3</sub>) δ: 7.24 (t, *J* = 8.5 Hz, 1H), 6.93–6.86 (m, 2H), 6.84–6.79 (m, 1H), 3.75 (s, 3H), 3.70–3.61 (m, 2H), 2.97–2.90 (m, 2H), 1.82–1.69 (m, 2H), 1.60 (septet, *J* = 6.7 Hz, 1H), 1.44–1.26 (m, 4H), 0.87 (t, *J* = 7.35 Hz, 3H), 0.82 (d, *J* = 6.63 Hz, 6H); <sup>13</sup>C NMR (75 MHz, CDCl<sub>3</sub>) δ: 155.4, 142.4, 138.3, 128.7, 128.4, 127.7, 127.2, 126.7, 126.1, 69.3, 54.1, 22.0; IR (thin film) 2979, 1700.36, 1597, 1496, 1456, 1398, 1275, 1110, 1018, 697 cm<sup>-1</sup>; Anal. Calcd. for C<sub>13</sub>H<sub>17</sub>NO<sub>3</sub>: C, 61.31; H, 8.68. Found: C, 61.50; H, 8.81.

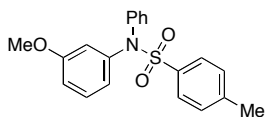

***N*-(3-methoxyphenyl)-4-methyl-*N*-phenylbenzenesulfonamide** (Table 2, Entry 10) Following general procedure D, a mixture of 4-methyl-*N*-phenylbenzenesulfonamide (618 mg, 2.5 mmol), 3-methoxyphenyl 1,1,2,2,3,3,4,4,4-nonafluorobutane-1-sulfonate<sup>6</sup> (406 mg, 1.0 mmol), K<sub>3</sub>PO<sub>4</sub> (424 mg, 2.0 mmol), **L6** (40 mg, 5 mol%), [Pd(allyl)Cl]<sub>2</sub> (3.6 mg, 2 mol%), and toluene (4 mL) was heated to 110 °C for 17 h. The crude product was

purified using a Biotage SP4 (silica-packed 50 g; 0-25% EtOAc/hexanes) to provide the title compound as a white solid (271 mg, 77%); mp = 74–76 °C; <sup>1</sup>H NMR (300 MHz, CDCl<sub>3</sub>) δ: 7.61 (d, *J* = 8.1 Hz, 2H), 7.25 (m, 8H), 6.83 (m, 3H), 3.73 (s, 3H), 2.41 (s, 3H); <sup>13</sup>C NMR (75 MHz, CDCl<sub>3</sub>) δ: 160.3, 144.0, 142.9, 141.7, 137.8, 130.1, 129.9, 129.5, 128.6, 128.0, 127.8, 120.5, 114.4, 113.2, 55.6, 21.9; IR (thin film) 2941, 2837, 1602, 1452, 1288, 1166, 1045, 814, 694, 608 cm<sup>-1</sup>.

### Experimental Procedures for Table 3

**General procedure E:** An oven-dried test tube fitted with a teflon septum and magnetic stir bar was charged with Cs<sub>2</sub>CO<sub>3</sub> (648 mg, 2.0 mmol) and 3 Å mol sieves (200 mg). The powder was flame-dried under vacuum to activate the molecular sieves and remove trace water. The vessel was then charged with **L6** (40 mg, 5 mol%) and [Pd(allyl)Cl]<sub>2</sub> (3.6 mg, 2 mol%); then the aryl chloride (1.0 mmol), amide (2.5 mmol), and toluene (4 mL) were added via syringe (aryl chlorides or amides that were solids were added with the ligand and [Pd]). The solution was heated to 130 °C for 17 h, cooled to room temperature, and diluted with ethyl acetate, filtered through celite, concentrated *in vacuo* and purified by column chromatography.

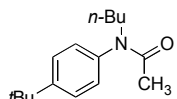

***N*-butyl-*N*-(4-*tert*-butylphenyl)acetamide** (Table 3, Entry 1) Following general procedure E, a mixture of *N*-butyl acetamide (268 mg, 2.5 mmol), 1-*tert*-butyl-4-chlorobenzene (169 mg, 1.0 mmol), Cs<sub>2</sub>CO<sub>3</sub> (648 mg, 2.0 mmol), **L6** (40 mg, 5 mol%), [Pd(allyl)Cl]<sub>2</sub> (3.6 mg, 2 mol%), and toluene (4 mL) was heated to 130 °C for 17 h. The crude product was purified using a Biotage SP4 (silica-packed 25M; 5-60% EtOAc/hexanes) to provide the title compound as an oil (192 mg, 78%); Characterization matches Table 1, Entry 1.

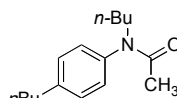

***N*-butyl-*N*-(4-butylphenyl)acetamide** (Table 3, Entry 2) Following general procedure E, a mixture of *N*-butyl acetamide (268 mg, 2.5 mmol), 1-*tert*-butyl-4-chlorobenzene (169 mg, 1.0 mmol), Cs<sub>2</sub>CO<sub>3</sub> (648 mg, 2.0 mmol), **L6** (40 mg, 5 mol%), [Pd(allyl)Cl]<sub>2</sub> (3.6 mg, 2 mol%), and toluene (4 mL) was heated to 130 °C for 17 h. The crude product was purified using a Biotage SP4 (silica-packed 25M; 5-60% EtOAc/hexanes) to provide the title compound as an oil (184 mg, 75%); <sup>1</sup>H NMR (400 MHz, CDCl<sub>3</sub>) δ: 7.20 (d, *J* = 6.4 Hz, 2H), 7.04 (d, *J* = 8.0 Hz, 2H), 3.65 (t, *J* = 7.6 Hz, 2H), 2.63 (t, *J* = 7.6 Hz, 2H), 1.8 (s, 3H), 1.63–1.57 (m, 2H), 1.49–1.44 (m, 2H), 1.40–1.26 (m, 4H), 0.94 (t, *J* = 7.6 Hz, 3H), 0.87 (t, *J* = 7.6 Hz, 3H); <sup>13</sup>C NMR (100 MHz, CDCl<sub>3</sub>) δ: 170.2, 142.5, 140.6, 129.4, 127.7, 48.7, 35.1, 33.4, 29.8, 22.7, 22.3, 19.9, 13.8, 13.7; IR (thin film) 2931, 1653, 1509, 1395 cm<sup>-1</sup>; Anal. Calcd. for C<sub>16</sub>H<sub>25</sub>NO: C, 77.68; H, 10.19. Found: C, 77.65; H, 10.25.

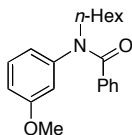

***N*-hexyl-*N*-(3-methoxyphenyl)benzamide** (Table 3, Entry 3) Following general procedure E, a mixture of *N*-hexylbenzamide (512 mg, 2.5 mmol), 1-chloro-3-methoxybenzene (123 μL, 1.0 mmol), K<sub>2</sub>CO<sub>3</sub> (276 mg, 2.0 mmol),

**L6** (40 mg, 5 mol%), [Pd(allyl)Cl]<sub>2</sub> (3.6 mg, 2 mol%), and toluene (4 mL) was heated to 130 °C for 17 h. The crude product was purified using a Biotage SP4 (silica-packed 25M; 6-50% EtOAc/hexanes) to provide the title compound as an oil (167 mg, 54%): <sup>1</sup>H NMR (400 MHz, CDCl<sub>3</sub>) δ: 7.30 (dd, *J* = 8.0, 1.6 Hz, 2H), 7.22–7.08 (m, 4H), 6.67 (ddd, *J* = 8.4, 2.4, 0.8 Hz, 1H), 6.60 (br d, *J* = 8.0 Hz, 1H), 6.55 (m, 1H), 3.89 (t, *J* = 7.6 Hz, 2H), 3.67 (s, 3H), 1.64–1.60 (m, 2H), 1.35–1.25 (m, 6H), 0.86 (t, *J* = 6.8 Hz, 3H); <sup>13</sup>C NMR (100 MHz, CDCl<sub>3</sub>) δ: 170.2, 159.8, 144.6, 136.4, 129.5, 129.4, 128.4, 127.6, 120.1, 113.6, 111.9, 55.2, 50.4, 31.5, 27.5, 26.5, 22.5, 14.0; IR (thin film) 2930, 1646, 1600, 1488 cm<sup>-1</sup>; Anal. Calcd. for C<sub>20</sub>H<sub>25</sub>NO: C, 77.14; H, 8.09. Found: C, 77.16; H, 8.05.

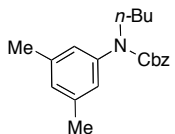

**benzyl butyl(3,5-dimethylphenyl)carbamate** (Table 3, Entry 4)

Following general procedure E, a mixture of benzyl butylcarbamate (518 mg, 2.5 mmol), 1-chloro-3,5-dimethylbenzene (141 μL, 1.0 mmol), Cs<sub>2</sub>CO<sub>3</sub> (648 mg, 2.0 mmol), **L6** (40 mg, 5 mol%), [Pd(allyl)Cl]<sub>2</sub> (3.6 mg, 2 mol%), and toluene (4 mL) was heated to 130 °C for 17 h. The crude product was purified using a Biotage SP4 (silica-packed 25M; 6-25% EtOAc/hexanes) to provide the title compound as an oil (285 mg, 92%): <sup>1</sup>H NMR (400 MHz, CDCl<sub>3</sub>) δ: 7.32–7.26 (m, 5H), 6.89 (s, 1H), 6.80 (s, 2H), 5.14 (s, 2H), 3.63 (t, *J* = 7.6 Hz, 2H), 2.30 (s, 6H), 1.53–1.50 (m, 2H), 1.32–1.26 (m, 2H), 0.88 (t, *J* = 7.2 Hz, 3H); <sup>13</sup>C NMR (100 MHz, CDCl<sub>3</sub>) δ: 155.3, 141.5 (br s), 138.3, 136.8, 128.2, 127.6, 127.4 (br s), 124.9, 66.7, 50.1, 30.2 (br s), 21.1, 19.7, 13.7; IR (thin film) 2957, 1700, 1598, 1384 cm<sup>-1</sup>; Anal. Calcd. for C<sub>20</sub>H<sub>25</sub>NO<sub>2</sub>: C, 77.14; H, 8.09. Found: C, 77.01; H, 8.10.

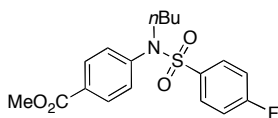

**methyl 4-(N-butyl-4-fluorophenylsulfonamido)benzoate** (Table 3, Entry 5)

Following general procedure E, a mixture of *N*-butyl-4-fluorobenzenesulfonamide (577 mg, 2.5 mmol), methyl 4-chlorobenzoate (171 mg, 1 mmol), Cs<sub>2</sub>CO<sub>3</sub> (648 mg, 2.0 mmol), **L6** (40 mg, 5 mol%), [Pd(allyl)Cl]<sub>2</sub> (3.6 mg, 2 mol%), and toluene (4 mL) was heated to 130 °C for 17 h. The crude product was purified using a Biotage SP4 (silica-packed 25M; 6-25% EtOAc/hexanes) to provide the title compound as a solid (321 mg, 88%): mp 97–98 °C; <sup>1</sup>H NMR (300 MHz, CDCl<sub>3</sub>) δ: 7.92 (d, *J* = 8.53 Hz, 2H), 7.5 (dd, *J* = 8.8, 5.1 Hz, 2H), 7.12–7.02 (m, 4H), 3.83 (s, 3H), 3.51 (t, *J* = 6.62 Hz, 2H), 1.38–1.16 (m, 4H), 0.75 (t, *J* = 6.8 Hz, 3H); <sup>13</sup>C NMR (100 MHz, CDCl<sub>3</sub>) δ: 166.5, 165.9, 163.2, 142.9, 133.6, 133.5, 130.1, 130.0, 129.9, 129.1, 127.1, 116.1, 115.8, 52.0, 49.5, 29.8, 19.2, 13.2; IR (thin film) 2958, 1724, 1592, 1494, 1355, 1280, 1172, 1088, 839 cm<sup>-1</sup>; Anal. Calcd. for C<sub>18</sub>H<sub>20</sub>FNO<sub>4</sub>S: C, 59.16; H, 5.52. Found: C, 59.29; H, 5.43.

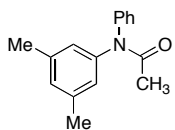

***N*-(3,5-dimethylphenyl)-*N*-phenylacetamide**<sup>8</sup> (Table 3, Entry 6)

Following general procedure G, a mixture of *N*-phenylacetamide (336 mg, 2.5 mmol), 1-chloro-3,5-dimethylbenzene (135 μL, 1.0 mmol), K<sub>3</sub>PO<sub>4</sub> (424 mg, 2.0 mmol), **L6** (40 mg, 5 mol%), [Pd(allyl)Cl]<sub>2</sub> (3.6 mg, 2 mol%), and toluene (4 mL) was heated to 130 °C for 17 h. The crude product was purified using a Biotage SP4 (silica-packed 25M; 6-25% EtOAc/hexanes) to provide the title compound as a solid (162 mg, 68%): mp 91–93 °C (lit. 89–90 °C); <sup>1</sup>H NMR (400

<sup>8</sup> Klapars, A.; Antilla, J. C.; Huang, X.; Buchwald, S. L. *J. Am. Chem. Soc.* **2001**, *123*, 7727.

MHz, CDCl<sub>3</sub>)  $\delta$ : 7.34–7.26 (m, 5H), 6.95–6.86 (m, 3H), 2.30 (br s, 6H), 2.06 (s, 3H); IR (thin film) 3010, 2918, 1675, 1595, 1492 cm<sup>-1</sup>; Anal. Calcd. for C<sub>16</sub>H<sub>17</sub>NO: C, 80.30; H, 7.16. Found: C, 80.12; H, 7.19.

#### Experimental Procedures for Table 4

**General procedure F:** An oven-dried test tube fitted with a teflon septum and magnetic stir bar was charged with K<sub>3</sub>PO<sub>4</sub> (636 mg, 3.0 mmol) and 3 Å mol sieves (200 mg). The powder was flame-dried under vacuum to activate the molecular sieves and remove trace water. The vessel was then charged with **L6** (40 mg, 5 mol%) and [Pd(allyl)Cl]<sub>2</sub> (3.6 mg, 2 mol%), then the aryl nonaflate/triflate (2.2 mmol), amide (1.0 mmol), and toluene (4 mL) were added via syringe (aryl nonaflates/triflates or amides that were solids were added with the ligand and [Pd]). The solution was heated to 110 °C for 17 h, cooled to room temperature, and diluted with ethyl acetate, filtered through celite, concentrated *in vacuo* and purified by column chromatography.

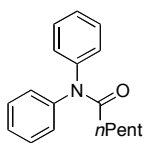

***N,N*-diphenylhexanamide** (Table 4, Entry 1) Following general procedure F, a mixture of hexanamide (115 mg, 1.0 mmol), phenyl trifluoromethanesulfonate (358  $\mu$ L, 2.2 mmol), K<sub>3</sub>PO<sub>4</sub> (636 mg, 3.0 mmol), **L6** (40 mg, 5 mol%), [Pd(allyl)Cl]<sub>2</sub> (3.6 mg, 2 mol%), and toluene (4 mL) was heated to 110 °C for 17 h. The crude product was purified using a Biotage SP4 (silica-packed 25M; 3-30% EtOAc/hexanes) to provide the title compound as a white solid (223 mg, 84%): mp 50 °C; <sup>1</sup>H NMR (400 MHz, CDCl<sub>3</sub>)  $\delta$ : 7.36–7.25 (m, 10H), 2.25 (t, *J* = 7.2 Hz, 2H), 1.68–1.61 (m, 2H), 1.27–1.22 (m, 4H), 0.85 (t, *J* = 7.2 Hz, 3H); <sup>13</sup>C NMR (100 MHz, CDCl<sub>3</sub>)  $\delta$ : 173.3, 142.9, 128.8 (br s), 126.5 (br s), 35.2, 31.4, 25.2, 22.4, 13.9; IR (thin film) 2955, 1674, 1491 cm<sup>-1</sup>.

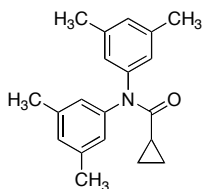

***N,N*-bis(3,5-dimethylphenyl)cyclopropanecarboxamide** (Table 4, Entry 2) Following general procedure F, a mixture of cyclopropanecarboxamide (85 mg, 1.0 mmol), 3,5-dimethylphenyl 1,1,2,2,3,3,4,4,4-nonafluorobutane-1-sulfonate (888 mg, 2.2 mmol), K<sub>3</sub>PO<sub>4</sub> (636 mg, 3.0 mmol), **L6** (40 mg, 5 mol%), [Pd(allyl)Cl]<sub>2</sub> (3.6 mg, 2 mol%), and toluene (4 mL) was heated to 110 °C for 17 h. The crude product was purified using a Biotage SP4 (silica-packed 25M; 3-30% EtOAc/hexanes) to provide the title compound as a white solid (205 mg, 70%): mp 122 °C; <sup>1</sup>H NMR (400 MHz, CDCl<sub>3</sub>)  $\delta$ : 6.90 (br s, 6H), 2.29 (br s, 12H), 1.56–1.52 (m, 1H), 1.11–1.08 (m, 2H), 0.72–0.68 (m, 2H); <sup>13</sup>C NMR (100 MHz, CDCl<sub>3</sub>)  $\delta$ : 173.8, 142.9, 138.6, 125.8, 124.3, 21.2, 13.6, 9.1; IR (thin film) 2918, 1667, 1594, 1394 cm<sup>-1</sup>.

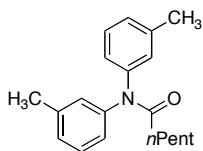

***N,N*-di-*m*-tolylhexanamide** (Table 4, Entry 3) Following general procedure F, a mixture of hexanamide (115 mg, 1.0 mmol), 1-chloro-3-methylbenzene (259  $\mu$ L, 2.2 mmol), K<sub>3</sub>PO<sub>4</sub> (636 mg, 3.0 mmol), **L6** (80 mg, 10 mol%), [Pd(allyl)Cl]<sub>2</sub> (7.2 mg, 4 mol%), and toluene (4 mL) was heated to 110 °C for 17 h. The crude product was purified by

column chromatography (25:75 Et<sub>2</sub>O/pentane) to provide the title compound as an oil (220 mg, 75%): <sup>1</sup>H NMR (400 MHz, CDCl<sub>3</sub>) δ: 7.26–6.99 (m, 8H), 2.33 (s, 6H), 2.24 (t, *J* = 7.2 Hz, 2H), 1.69–1.61 (m, 2H), 1.27–1.22 (m, 4H), 0.85 (t, *J* = 6.4 Hz, 3H); <sup>13</sup>C NMR (100 MHz, CDCl<sub>3</sub>) δ: 173.2, 142.8, 128.7 (br s), 127.1 (br s), 125.5 (br s), 123.5 (br s), 35.0, 31.3, 25.1, 22.3, 21.2, 13.8; IR (thin film) 2935, 1674, 1604, 1488 cm<sup>-1</sup>.

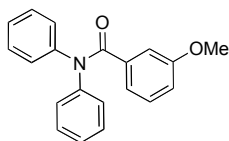

**3-methoxy-*N,N*-diphenylbenzamide** (Table 4, Entry 4) Following general procedure F, a mixture of 3-methoxybenzamide (151 mg, 1.0 mmol), trifluoromethanesulfonate (358 μL, 2.2 mmol), K<sub>3</sub>PO<sub>4</sub> (636 mg, 3.0 mmol), **L6** (60 mg, 7.5 mol%), [Pd(allyl)Cl]<sub>2</sub> (5.4 mg, 3 mol%), and toluene (4 mL) was heated to 110 °C for 17 h. The crude product was purified using a Biotage SP4 (silica-packed 25M; 3-30% EtOAc/hexanes) to provide the title compound as a white solid (191 mg, 63%): mp 124–125 °C; <sup>1</sup>H NMR (400 MHz, CDCl<sub>3</sub>) δ: 7.29–6.79 (m, 14H), 3.64 (s, 3H); <sup>13</sup>C NMR (100 MHz, CDCl<sub>3</sub>) δ: 170.1, 158.7, 143.6, 137.0, 128.9, 128.7, 127.2, 126.1, 121.4, 116.3, 113.8, 55.0; IR (thin film) 3063, 1652, 1591 cm<sup>-1</sup>; Anal. Calcd. for C<sub>20</sub>H<sub>17</sub>NO<sub>2</sub>: C, 79.19; H, 5.65. Found: C, 78.91; H, 5.68.

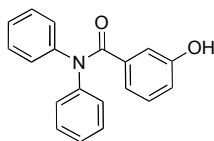

**3-hydroxy-*N,N*-diphenylbenzamide** (Table 4) To a solution of 3-methoxy-*N,N*-diphenylbenzamide (100 mg, 0.33 mmol) in CH<sub>2</sub>Cl<sub>2</sub> (3 mL, 1 M) cooled to -78 °C was added BBr<sub>3</sub> (1 M in CH<sub>2</sub>Cl<sub>2</sub>, 680 μL, 0.70 mmol) dropwise via syringe. The reaction was stirred 1 h at -78 °C then warmed to rt, stirred 10 min, then diluted with CH<sub>2</sub>Cl<sub>2</sub> and brine. The organic layer was washed with sat. Na<sub>2</sub>S<sub>2</sub>O<sub>3</sub> and brine, then dried over Na<sub>2</sub>SO<sub>4</sub>, filtered and concentrated. The crude reaction mixture was purified by column chromatography (7-70% EtOAc/hexanes) to provide the title compound (78 mg, 82%): mp 147 °C; <sup>1</sup>H NMR (400 MHz, CDCl<sub>3</sub>) δ: 7.26 (t, *J* = 7.6 Hz, 4H), 7.18–7.10 (m, 7H), 6.93 (t, *J* = 8.0 Hz, 1H), 7.75 (d, *J* = 7.6 Hz, 1H), 6.69 (dd, *J* = 8.4, 2.4 Hz, 1H), 6.49 (br s, 1H); <sup>13</sup>C NMR (100 MHz, CDCl<sub>3</sub>) δ: 156.2, 143.6, 136.8, 129.1, 128.8, 127.4, 126.6, 120.8, 117.8, 116.5; IR (thin film) 3305, 1634, 1581 cm<sup>-1</sup>.

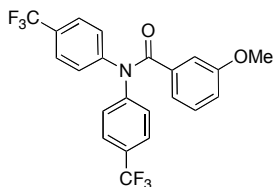

**3-methoxy-*N,N*-bis(4-(trifluoromethyl)phenyl)benzamide** (Table 4, Entry 5) Following general procedure F, a mixture of 3-methoxybenzamide (151 mg, 1.0 mmol), 4-(trifluoromethyl)phenyl 1,1,2,2,3,3,4,4,4-nonafluorobutane-1-sulfonate<sup>6</sup> (977 mg, 2.2 mmol), K<sub>3</sub>PO<sub>4</sub> (636 mg, 3.0 mmol), **L6** (60 mg, 7.5 mol%), [Pd(allyl)Cl]<sub>2</sub> (5.4 mg, 3 mol%), and toluene (4 mL) was heated to 110 °C for 17 h. The crude product was purified using a Biotage SP4 (silica-packed 25M; 2-20% EtOAc/hexanes) to provide the title compound as an oil (306 mg, 70%): <sup>1</sup>H NMR (400 MHz, CDCl<sub>3</sub>) δ: 7.55 (d, *J* = 8.8 Hz, 4H), 7.21 (d, *J* = 8.4 Hz, 4H), 7.10 (t, *J* = 8.0 Hz, 1H), 7.02–6.86 (m, 3H), 3.68 (s, 3H); <sup>13</sup>C NMR (100 MHz, CDCl<sub>3</sub>) δ: 170.3, 159.3, 146.4, 135.9, 129.2, 129.0, 128.6, 128.3, 128.0, 127.4, 126.4, 125.0, 122.3, 121.5, 117.2, 114.2, 55.1; <sup>19</sup>F NMR (376 MHz, CDCl<sub>3</sub>) δ: -62.7; IR (thin film) 1670, 1611, 1323 cm<sup>-1</sup>; Anal. Calcd. for C<sub>22</sub>H<sub>15</sub>F<sub>6</sub>NO<sub>2</sub>: C, 60.14; H, 3.44. Found: C, 60.34; H, 3.47.

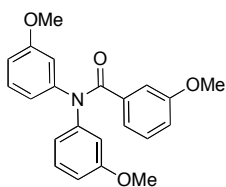

**3-methoxy-*N,N*-bis(3-methoxyphenyl)benzamide** (Table 4, Entry 6) Following general procedure F, a mixture of 3-methoxybenzamide (151 mg, 1.0 mmol), 3-methoxyphenyl 1,1,2,2,3,3,4,4,4-nonafluorobutane-1-sulfonate (893 mg, 2.2 mmol),  $K_3PO_4$  (636 mg, 3.0 mmol), **L6** (60 mg, 7.5 mol%),  $[Pd(allyl)Cl]_2$  (5.4 mg, 3 mol%), and toluene (4 mL) was heated to 110 °C for 17 h. The crude product was purified using a Biotage SP4 (silica-packed 25M; 4-40% EtOAc/hexanes) to provide the title compound as an oil (200 mg, 55%):  $^1H$  NMR (400 MHz,  $CDCl_3$ )  $\delta$ : 7.23–7.00 (m, 5H), 6.82–6.68 (m, 7H), 3.68 (s, 6H), 3.66 (s, 3H);  $^{13}C$  NMR (100 MHz,  $CDCl_3$ )  $\delta$ : 170.1, 159.9, 158.8, 144.7, 137.2, 129.6, 128.8, 121.3, 119.6, 116.5, 113.7, 113.1, 111.9, 55.1, 55.0; IR (thin film) 2940, 1652, 1599  $cm^{-1}$ ; Anal. Calcd. for  $C_{22}H_{21}NO_4$ : C, 72.71; H, 5.82. Found: C, 72.66; H, 5.77.

### Synthesis of Aryl Nonaflates

**General procedure G: Synthesis of Aryl Nonaflates** To a solution of phenol (1 equiv), diisopropylethyl amine (1.2 equiv), and DMAP (0.05 equiv) in  $CH_2Cl_2$  (1 M) was added perfluorobutanesulfonyl fluoride (1.1 equiv). The reaction was stirred 2 h at rt, then diluted with sat.  $NH_4Cl$  and  $CH_2Cl_2$ . The organic layer was washed with sat.  $NaHCO_3$  and brine; dried over  $Na_2SO_4$ , filtered and concentrated *in vacuo*. The resulting oil was purified by column chromatography.

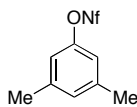

**3,5-dimethylphenyl 1,1,2,2,3,3,4,4,4-nonafluorobutane-1-sulfonate** Following general procedure G, a mixture of 3,5-dimethylphenol (10.3 g, 84.3 mmol), diisopropyl ethylamine (18 mL, 101 mmol), DMAP (500 mg), and perfluorobutanesulfonyl fluoride (28 g, 92.7 mmol) was stirred for 2 h at rt. The crude product was purified by column chromatography (5:95 EtOAc/hexanes) to provide the title compound as a clear oil (13.8 g, 41%):  $^1H$  NMR (400 MHz,  $CDCl_3$ )  $\delta$ : 7.02 (s, 1H), 6.91 (s, 2H), 2.36 (s, 6H);  $^{13}C$  NMR (100 MHz,  $CDCl_3$ )  $\delta$ : 149.8, 140.4, 130.0, 118.8, 116.0–109.9 (m, 4C) 21.0;  $^{19}F$  NMR (376 MHz,  $CDCl_3$ )  $\delta$ : -81.1–(-81.2), -109.6–(-109.7), -121.3–(-121.4), -126.2–(-126.4); IR (thin film) 2928, 1625, 1426  $cm^{-1}$ ; Anal. Calcd. For  $C_{12}H_9F_9O_3$ : C, 35.65; H, 2.24. Found: C, 35.70; H, 2.26.

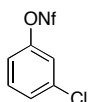

**3-chlorophenyl 1,1,2,2,3,3,4,4,4-nonafluorobutane-1-sulfonate** Following general procedure G, a mixture of 3-chlorophenol (1.2 g, 10 mmol), diisopropyl ethylamine (1.67 mL, 12 mmol), DMAP (61 mg), and perfluorobutanesulfonyl fluoride (3.3 g, 11 mmol) was stirred for 2 h at rt. The crude product was purified by column chromatography (5:95 EtOAc/hexanes) to provide the title compound as a clear oil (3.3 g, 81%):  $^1H$  NMR (400 MHz,  $CDCl_3$ )  $\delta$ : 7.44–7.37 (m, 2H), 7.32–7.31 (m, 1H), 7.23–7.17 (m, 1H);  $^{13}C$  NMR (100 MHz,  $CDCl_3$ )  $\delta$ : 149.8, 135.7, 130.9, 128.8, 122.1, 119.7 (4C not detected);  $^{19}F$  NMR (376 MHz,  $CDCl_3$ )  $\delta$ : -80.88–(-80.9) (m), -109.0–



(-109.1), -121.1–(-121.2) (m), 126.1–(-126.2) (m); IR (thin film) 1582, 1470, 1241  $\text{cm}^{-1}$ ; Anal. Calcd. For  $\text{C}_{10}\text{H}_4\text{ClF}_9\text{O}_3$ : C, 29.25; H, 0.98. Found: C, 29.40; H, 0.97.

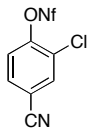

**3-chloro-4-(perfluorobutoxy)benzonitrile** Following general procedure G, a mixture of 3-chloro-4-hydroxybenzonitrile (5 g, 32.5 mmol), diisopropyl ethylamine (6.9 mL, 39 mmol), DMAP (200 mg), and perfluorobutanesulfonyl fluoride (10.9 g, 35.8 mmol) was stirred for 2 h at rt. The crude product was purified by column chromatography (20% EtOAc/hexanes) to provide the title compound as a white solid (5.65 g, 40%):  $^1\text{H}$  NMR (400 MHz,  $\text{CDCl}_3$ )  $\delta$ : 7.87 (d,  $J = 2.0$  Hz, 1H), 7.68 (dd,  $J = 8.4, 2.0$  Hz, 1H), 7.52 (d,  $J = 8.8$  Hz, 1H);  $^{13}\text{C}$  NMR (100 MHz,  $\text{CDCl}_3$ )  $\delta$ : 148.7, 134.9, 134.5, 132.3, 129.0, 124.1, 116.0, 113.7 (4C not detected);  $^{19}\text{F}$  NMR (376 MHz,  $\text{CDCl}_3$ )  $\delta$ : -80.78–(-80.83) (m), -109.7–(-109.1), -120.9–(-120.9) (m), 126.0–(-126.1) (m); IR (thin film) 1426, 1202  $\text{cm}^{-1}$ ; Anal. Calcd. For  $\text{C}_{11}\text{H}_3\text{ClF}_9\text{O}_3$ : C, 30.33; H, 0.69. Found: C, 30.57; H, 0.54.

## Synthesis of Secondary Amides and Related Nucleophiles

**General procedure H: Synthesis of Secondary Amides** To a solution of amine (1 equiv) and pyridine (1.2 equiv) in  $\text{CH}_2\text{Cl}_2$  (1 M) cooled to 0  $^\circ\text{C}$  was added the acyl chloride (1.05 equiv). The reaction mixture was stirred for 1 h at rt, then diluted with sat.  $\text{NH}_4\text{Cl}$  and  $\text{CH}_2\text{Cl}_2$ . The organic layer was washed with sat.  $\text{NaHCO}_3$  and brine, dried over  $\text{Na}_2\text{SO}_4$ , filtered and concentrated. The resulting oil was purified by column chromatography.

**General procedure I: Synthesis of Ureas** To a solution of secondary amine (1 equiv) and triethylamine (1.1 equiv) in  $\text{CH}_2\text{Cl}_2$  (1 M) cooled to 0  $^\circ\text{C}$  was added the isocyanate (1.05 equiv). The reaction mixture was stirred for 2 h at rt, then diluted with EtOAc and sat  $\text{NH}_4\text{Cl}$ . The organic layer was washed with sat.  $\text{NaHCO}_3$  and brine, dried over  $\text{Na}_2\text{SO}_4$ , filtered, and concentrated. The resulting solid was used directly.

**General procedure J: Synthesis of Carbamates** To a solution of amine (1 equiv) in THF/ $\text{H}_2\text{O}$  (50:50, 0.25 M) cooled to 0  $^\circ\text{C}$  was added  $\text{NaHCO}_3$  (1.5 equiv) and the alkyl chloroformate (1.5 equiv). The reaction mixture was stirred for 2 h at rt, then diluted with EtOAc and sat  $\text{NH}_4\text{Cl}$ . The organic layer was washed with sat.  $\text{NaHCO}_3$  and brine, dried over  $\text{Na}_2\text{SO}_4$ , filtered, and concentrated. The resulting oil was purified by column chromatography.

**General procedure K: Synthesis of Sulfonamides** To a solution of amine (1 equiv), triethylamine (1.2 equiv), and DMAP (0.05 equiv) in  $\text{CH}_2\text{Cl}_2$  (1 M) cooled to 0  $^\circ\text{C}$  was added the sulfonyl chloride (1.1 equiv). The reaction mixture was stirred for 2 h at rt, then diluted with  $\text{CH}_2\text{Cl}_2$  and sat.  $\text{NH}_4\text{Cl}$ . The organic layer was washed with sat.  $\text{NaHCO}_3$  and brine, dried over  $\text{Na}_2\text{SO}_4$ , filtered, and concentrated. The resulting oil was purified by column chromatography.

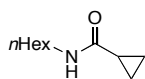

**N-hexylcyclopropanecarboxamide** Following general procedure H, a mixture of *n*-hexylamine (6.7 mL, 50 mmol), pyridine (4.8 mL, 52.5 mmol), and cyclopropanecarbonyl chloride (4.77 mL, 52.5 mmol) was stirred for 1 h at rt. The crude product was purified by column chromatography (70:30 EtOAc/hexanes) to provide the title compound as a white solid (5.74 g, 68%): mp 49 °C; <sup>1</sup>H NMR (400 MHz, CDCl<sub>3</sub>) δ: 5.73 (br s, 1H), 3.24 (q, *J* = 6.8, 2H), 1.52–1.45 (m, 1H), 1.34–1.23 (m, 6H), 0.96–0.92 (m, 2H), 0.87 (t, *J* = 6.8 Hz, 3H), 0.74–0.68 (m, 2H); <sup>13</sup>C NMR (100 MHz, CDCl<sub>3</sub>) δ: 173.4, 39.7, 31.4, 29.6, 26.5, 22.5, 14.6, 14.0, 6.8; IR (thin film) 3302, 1636, 1549 cm<sup>-1</sup>; Anal. Calcd. For C<sub>10</sub>H<sub>19</sub>NO<sub>3</sub>: C, 70.96; H, 11.31. Found: C, 70.96; H, 11.62.

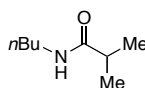

**N-butylisobutyramide**<sup>9</sup> Following general procedure H, a mixture of *N*-butylamine (4.9 mL, 50 mmol), pyridine (4.8 mL, 60 mmol), and isobutyrylchloride (5.49 mL, 52.5 mmol) was stirred for 1 h at rt. The crude product was purified by column chromatography (50:50 EtOAc/hexanes) to provide the title compound as an oil (1.9 g, 27%): <sup>1</sup>H NMR (400 MHz, CDCl<sub>3</sub>) δ: 5.46 (br s, 1H), 3.23 (q, 7.2 Hz, 2H), 2.32 (septet, *J* = 6.8 Hz, 1H), 1.49–1.45 (m, 2H), 1.37–1.31 (m, 2H), 1.14 (d, *J* = 7.2 Hz, 6H), 0.92 (t, *J* = 7.2 Hz, 3H).

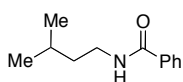

**N-isopentylbenzamide**<sup>10</sup> Following general procedure H, a mixture of 3-methylbutylamine (2.9 mL, 25 mmol), pyridine (2.4 mL, 30 mmol), and benzoyl chloride (3.0 mL, 26.3 mmol) was stirred for 1 h at rt. The crude product was purified by column chromatography (25:75 EtOAc/hexanes) to provide the title compound (3.62 g, 76%): <sup>1</sup>H NMR (400 MHz, CDCl<sub>3</sub>) δ: 7.75 (d, *J* = 6.8 Hz, 2H), 7.51–7.47 (m, 1H), 7.44–7.40 (m, 2H), 6.08 (br s, 1H), 3.50–3.45 (m, 2H), 1.68 (septet, *J* = 6.4 Hz, 1H), 1.51 (q, *J* = 7.6 Hz, 2H), 0.95 (d, *J* = 6.4 Hz, 6H).

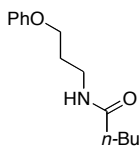

**N-(3-phenoxypropyl)pentanamide** A mixture of 4-phenoxybutyric acid (3.6 g, 20 mmol), *N*-butylamine (2.0 mL, 20 mmol), HOBT (169 mg), and DCC (4.6 g, 22 mmol) was stirred for 1 h at rt. The reaction mixture was diluted with CH<sub>2</sub>Cl<sub>2</sub> and sat. NH<sub>4</sub>Cl. The organic layer was washed with brine, dried over Na<sub>2</sub>SO<sub>4</sub>, filtered, and concentrated. The crude product was purified by column chromatography (25:75 EtOAc/hexanes) to provide the title compound as a white solid (3.8 g, 85%): mp 65 °C; <sup>1</sup>H NMR (400 MHz, CDCl<sub>3</sub>) δ: 7.27–7.22 (m, 2H), 6.91 (t, *J* = 7.6 Hz, 1H), 6.87–6.83 (m, 2H), 5.53 (br s, 1H), 3.97 (t, *J* = 6.0 Hz, 2H), 3.21 (q, *J* = 6.8 Hz, 2H), 2.34 (t, *J* = 6.8 Hz, 2H), 2.12–2.06 (m, 2H), 1.45–1.37 (m, 2H), 1.32–1.29 (m, 2H), 0.86 (t, *J* = 7.2 Hz, 3H); <sup>13</sup>C NMR (100 MHz, CDCl<sub>3</sub>) δ: 172.2, 158.7, 129.4, 120.7, 114.3, 66.7, 39.2, 33.0, 31.6, 25.2, 20.0, 13.7; IR (thin film) 3323, 2963, 1541 cm<sup>-1</sup>; Anal. Calcd. For C<sub>14</sub>H<sub>21</sub>NO<sub>2</sub>: C, 71.46; H, 8.99. Found: C, 71.68; H, 8.92.

<sup>9</sup> Cashman, T. J.; Linton, B. R. *Org. Lett.* **2007**, *9*, 5457.

<sup>10</sup> Huang, P.-Q.; Zheng, X.; Deng, X.-M. *Tetrahedron Lett.* **2001**, *42*, 9039.

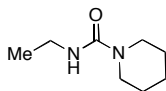

**N-ethylpiperidine-1-carboxamide** Following general procedure I, a mixture of piperidine (4.94 mL, 50 mmol), triethylamine (7.6 mL, 55 mmol), and ethyl isocyanate (4.12 mL, 52.5 mmol) was stirred for 2 h at rt. After workup, the resulting solid was used directly (6.2 g, 79%): mp 83 °C; <sup>1</sup>H NMR (400 MHz, CDCl<sub>3</sub>) δ: 4.40 (br s, 1H), 3.31–3.22 (m, 6H), 1.59–1.50 (m, 6H), 1.12 (t, *J* = 7.2 Hz, 3H); <sup>13</sup>C NMR (100 MHz, CDCl<sub>3</sub>) δ: 157.7, 44.7, 35.6, 25.5, 24.4, 15.5; IR (thin film) 3343, 2928, 1617, 1543 cm<sup>-1</sup>.

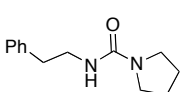

**N-phenethylpyrrolidine-1-carboxamide**<sup>11</sup> Following general procedure I, a mixture of pyrrolidine (1.65 mL, 20 mmol), triethylamine (3.1 mL, 22 mmol), and phenylethyl isocyanate (3.1 mL, 21 mmol) was stirred for 2 h at rt. After workup, the resulting solid was used directly (4.01 g, 92%): mp 78–80 °C (lit 84–85 °C); <sup>1</sup>H NMR (400 MHz, CDCl<sub>3</sub>) δ: 7.77–7.75 (m, 2H), 7.49–7.44 (m, 1H), 7.43–7.37 (m, 2H), 6.34 (br s, 1H), 3.46–3.39 (m, 2H), 1.61–1.55 (m, 2H), 1.37–1.29 (m, 6H), 0.90–0.86 (m, 3H).

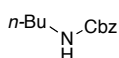

**benzyl butylcarbamate**<sup>12</sup> Following general procedure J, a mixture of *N*-butylamine (4.9 mL, 50 mmol), NaHCO<sub>3</sub> (6.3 g, 75 mmol), and benzyl chloroformate (10.7 mL, 75 mmol) was stirred for 2 h at rt. The crude reaction mixture was purified by column chromatography (8-80% EtOAc/hexanes) to provide the title compound as an oil (4.52 g, 44%): <sup>1</sup>H NMR (400 MHz, CDCl<sub>3</sub>) δ: 7.33–7.26 (m, 5H); 5.06 (s, 2H), 4.75 (br s, 1H), 3.16 (q, *J* = 6.8 Hz, 2H), 1.48–1.41 (m, 2H), 1.35–1.26 (m, 2H), 0.89 (t, *J* = 7.2 Hz, 3H).

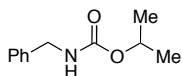

**isopropyl benzylcarbamate**<sup>13</sup> Following general procedure J, a mixture of *N*-benzylamine (2.18 mL, 20 mmol), NaHCO<sub>3</sub> (2.52 g, 30 mmol), and isopropyl chloroformate (3 mL, 30 mmol) was stirred for 2 h at rt. The crude product was purified by column chromatography (10-80% EtOAc/hexanes) to provide the title compound as an oil (3.4 g, 89%): <sup>1</sup>H NMR (400 MHz, CDCl<sub>3</sub>) δ: 7.36–7.26 (m, 5H), 4.96–4.88 (m, 2H), 4.37 (d, *J* = 5.6 Hz, 2H), 1.24 (d, *J* = 6.4 Hz, 6H).

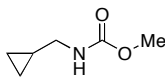

**methyl cyclopropylmethylcarbamate** Following general procedure J, a mixture of cyclopropylmethanamine (1.97 mL, 20 mmol), NaHCO<sub>3</sub> (2.52 g, 30 mmol), and methyl chloroformate (2.31 mL, 30 mmol) was stirred for 2 h at rt. The crude product was purified by column chromatography (10-80% EtOAc/hexanes) to provide the title compound as an oil (1.18 g, 60%): <sup>1</sup>H NMR (400 MHz, CDCl<sub>3</sub>) δ: 4.79 (br s, 1H), 3.66 (s, 3H), 3.03 (t, *J* = 5.6 Hz, 2H), 0.98–0.91 (m, 1H), 0.51–0.46 (m, 2H), 0.19–0.15; <sup>13</sup>C NMR (100 MHz, CDCl<sub>3</sub>) δ: 157.0, 51.9, 45.8, 11.0, 3.1; IR (thin film) 3335, 1704, 1537, 1256 cm<sup>-1</sup>.

<sup>11</sup> Yamaguchi, J.; Murayama, Y.; Suyama, T.; *Bull. Chem. Soc. Jpn.* **2002**, *75*, 329.

<sup>12</sup> McGhee, W.; Riley, D.; Christ, K.; Pan, Y.; Parnas, B. *J. Org. Chem.* **1995**, *60*, 2820.

<sup>13</sup> Mormeneo, D.; Llebaria, A.; Delgado, A. *Tetrahedron Lett.* **2004**, *45*, 6831.

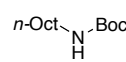 **tert-butyl octylcarbamate**<sup>14</sup> Di-*tert*-butyl dicarbonate (5.7 mL, 25 mmol) was added to *N*-octylamine (4.1 mL, 25 mmol) and the reaction was stirred neat for 2 h. The resulting oil was purified by column chromatography (10:90 EtOAc/hexanes) to provide the title compound (4.6 g, 81%): <sup>1</sup>H NMR (400 MHz, CDCl<sub>3</sub>) δ: 4.46 (br s, 1H), 3.10 (q, *J* = 6.8 Hz, 2H), 1.43 (br s, 11H), 1.30–1.20 (m, 10H), 0.87 (t, *J* = 6.8 Hz, 3H).

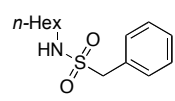 ***N*-hexyl-1-phenylmethanesulfonamide** Following general procedure K, a mixture of *N*-hexylamine (3.3 mL, 25 mmol), triethylamine (4.21 mL, 30 mmol), DMAP (152 mg) and phenylmethanesulfonyl chloride (5.24 g, 27.5 mmol) was stirred for 2 h at rt. The crude product was purified by column chromatography to provide the title compound as a solid (1.6 g, 25%): mp 97 °C; <sup>1</sup>H NMR (400 MHz, CDCl<sub>3</sub>) δ: 7.40–7.37 (m, 5H), 4.24 (s, 2H), 4.04 (br s, 1H), 2.97 (q, *J* = 6.4 Hz, 2H), 1.48–1.42 (m, 2H), 1.31–1.22 (m, 6H), 0.87 (t, *J* = 8.0 Hz, 3H); <sup>13</sup>C NMR (100 MHz, CDCl<sub>3</sub>) δ: 130.5, 129.4, 128.7, 128.6, 58.5, 43.7, 31.2, 30.2, 26.1, 22.4, 13.9; IR (thin film) 3240, 2923, 1305 cm<sup>-1</sup>; Anal. Calcd. For C<sub>13</sub>H<sub>21</sub>NO<sub>2</sub>S: C, 61.14; H, 8.29. Found: C, 61.19; H, 8.12.

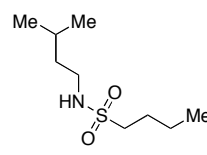 ***N*-isopentylbutane-1-sulfonamide** Following general procedure K, a mixture of isopentylamine (2.61 g, 30 mmol), triethylamine (5.05 mL, 36 mmol), DMAP (183 mg) and butanesulfonyl chloride (5.2 g, 33 mmol) was stirred for 2 h at rt. The crude product was purified by column chromatography (10-80% EtOAc/hexanes) to provide the title compound as a solid (5.03 g, 81%): mp 62 °C; <sup>1</sup>H NMR (400 MHz, CDCl<sub>3</sub>) δ: 4.13 (br s, 1H), 3.12 (q, *J* = 7.2 Hz, 2H), 3.03–2.98 (m, 2H), 1.80–1.76 (m, 2H), 1.66 (septet, *J* = 6.4 Hz, 1H), 1.49–1.42 (m, 4H), 0.95 (t, *J* = 7.2 Hz, 3H), 0.91 (d, *J* = 6.4 Hz, 6H); <sup>13</sup>C NMR (100 MHz, CDCl<sub>3</sub>) δ: 52.0, 41.4, 39.0, 25.5, 25.3, 22.2, 21.4, 13.5; IR (thin film) 3283, 2959, 1467, 1318 cm<sup>-1</sup>; Anal. Calcd. For C<sub>9</sub>H<sub>21</sub>NO<sub>2</sub>S: C, 52.14; H, 10.21. Found: C, 52.42; H, 10.14.

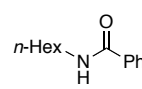 ***N*-hexylbenzamide**<sup>15</sup> Following general procedure H, a mixture of *n*-hexylamine (3.3 mL, 25 mmol), pyridine (2.4 mL, 30 mmol), and benzoyl chloride (3.0 mL, 26.3 mmol) was stirred for 1 h at rt. The crude product was purified by column chromatography (5-50% EtOAc/hexanes) to provide the title compound (3.7 g, 73%): mp 46–47 °C (lit 42–44 °C); <sup>1</sup>H NMR (400 MHz, CDCl<sub>3</sub>) δ: 7.78–7.75 (m, 2H), 7.49–7.44 (m, 1H), 7.44–7.37 (m, 2H), 6.34 (br s, 1H), 3.46–3.39 (m, 2H), 1.61–1.55 (m, 2H), 1.37–1.29 (m, 6H), 0.90–0.86 (m, 3H).

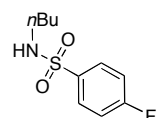 ***N*-butyl-4-fluorobenzenesulfonamide** Following general procedure K, a mixture of *N*-butylamine (2.4 mL, 25 mmol), triethylamine (4.21 mL, 30 mmol), DMAP (152 mg) and phenylmethanesulfonyl chloride (5.35 g, 27.5 mmol) was stirred for 2 h at rt. The crude product was purified by column chromatography (10-80% EtOAc/hexanes) to provide the title compound as a solid (1.6 g, 25%): mp 97 °C; <sup>1</sup>H NMR (400 MHz, CDCl<sub>3</sub>) δ: 7.40–7.37 (m, 5H), 4.24 (s, 2H), 4.04 (br s, 1H), 2.97 (q, *J* = 6.4 Hz, 2H), 1.48–1.42 (m, 2H), 1.31–1.22 (m, 6H), 0.87 (t, *J* = 8.0 Hz, 3H); <sup>13</sup>C NMR (100 MHz, CDCl<sub>3</sub>) δ: 130.5, 129.4, 128.7, 128.6, 58.5, 43.7, 31.2, 30.2, 26.1, 22.4, 13.9; IR (thin film) 3240, 2923, 1305 cm<sup>-1</sup>; Anal. Calcd. For C<sub>13</sub>H<sub>21</sub>NO<sub>2</sub>S: C, 61.14; H, 8.29. Found: C, 61.19; H, 8.12.

<sup>14</sup> Guin, J.; Frohlich, R.; Studer, A. *Angew. Chem., Int. Ed.* **2008**, *47*, 779.

<sup>15</sup> Erdik, E.; Daskapan, T.; *J. Chem. Soc., Perkin Trans. 1*, **1999**, 3139.

mmol) was stirred for 2 h at rt. The crude product was purified by column chromatography to provide the title compound as a white solid (1.24 g, 22%): mp 45 °C; <sup>1</sup>H NMR (400 MHz, CDCl<sub>3</sub>) δ: 7.91–7.86 (m, 2H), 7.22–7.16 (m, 2H), 2.95 (q, *J* = 6.8 Hz, 2H), 1.48–1.41 (m, 2H), 1.33–1.26 (m, 2H), 0.86 (t, *J* = 7.2 Hz, 3H); <sup>13</sup>C NMR (100 MHz, CDCl<sub>3</sub>) δ: 166.2, 163.7, 136.0, 136.7, 116.3, 116.1, 42.9, 31.4, 19.6, 13.4; IR (thin film) 3284, 2957, 1597, 1326 cm<sup>-1</sup>.

**General procedure L: Representative Procedure for In Situ IR Spectroscopy:** An oven-dried reaction tube fitted with a teflon septum, magnetic stir bar, and teflon screw valve was taken into the glove box and charged with  $K_2CO_3$  (276 mg, 2.0 mmol, pre-dried under vacuum at 130 °C for 18 h), 3 Å mol sieves (200 mg, pre-dried under vacuum at 130 °C), **L6** (40 mg, 5 mol%), and  $[Pd(allyl)Cl]_2$  (3.6 mg, 2 mol%). The tube was removed from the glove box and the React IR probe was secured in the reaction tube with a teflon adapter and evacuated and backfilled with Ar (this process was repeated a total of three times). Next, the aryl triflate/halide (1.0 mmol), amide (1.5 mmol), and toluene (4 mL) were added via syringe. The solution was placed in a 110 °C oil bath and the React IR scans started. The growing peak at  $1670\text{ cm}^{-1}$  (height to single point baseline =  $1722\text{ cm}^{-1}$ ) was monitored over the course of the reaction. After completion of the reaction, the mixture was cooled to room temperature, diluted with ethyl acetate, and dodecane was added as an internal standard. An aliquot was analyzed by gas chromatography to obtain a GC yield. Full Characterization for *N*-butyl-*N*-phenylacetamide:  $^1H$  NMR (400 MHz,  $CDCl_3$ )  $\delta$ : 7.41 (t,  $J = 7.6$  Hz, 2H), 7.34 (t,  $J = 7.2$  Hz, 1H), 7.15 (d,  $J = 7.6$  Hz, 2H), 3.68 (t,  $J = 7.6$  Hz, 2H), 1.81 (s, 3H), 1.51–1.43 (m, 2H), 1.35–1.27 (m, 2H), 0.87 (t,  $J = 7.6$  Hz, 3H);  $^{13}C$  NMR (100 MHz,  $CDCl_3$ )  $\delta$ : 170.0, 143.2, 129.5, 128.1, 127.7, 48.7, 29.8, 22.8, 19.9, 13.7; IR (thin film) 2931, 1661,  $1397\text{ cm}^{-1}$ .

### *In situ IR Comparison of L6 and L9*

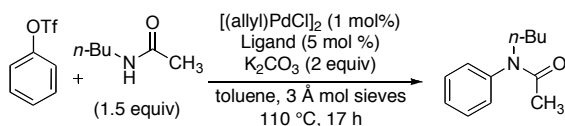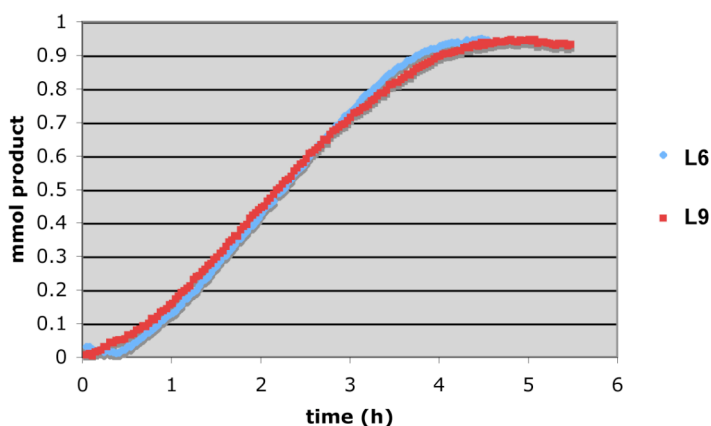

**Cartesian Coordinates for all Calculated  
Complexes and Transition States:**

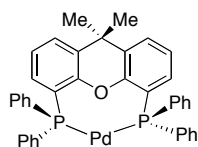

**Complex 1**

Pd -0.000026 -1.303521 -0.870129  
P -2.147600 -0.658998 -0.321496  
P 2.147552 -0.659073 -0.321410  
O -0.000029 1.399872 0.394373  
C -1.179288 2.011033 0.009806  
C -2.279430 1.198022 -0.331888  
C -3.458234 1.853243 -0.722641  
H -4.325285 1.264086 -1.000791  
C -3.531079 3.243598 -0.779437  
H -4.452551 3.725168 -1.094622  
C -2.425373 4.016366 -0.428758  
H -2.498844 5.097665 -0.471500  
C -1.233878 3.412463 -0.016845  
C 0.000023 4.179994 0.470910  
C 1.233922 3.412421 -0.016780  
C 2.425456 4.016288 -0.428629  
H 2.498959 5.097586 -0.471348  
C 3.531150 3.243487 -0.779283  
H 4.452655 3.725023 -1.094418  
C 3.458241 1.853132 -0.722524  
H 4.325263 1.263933 -1.000683  
C 2.279394 1.197963 -0.331813  
C 1.179280 2.010994 0.009859  
C 0.000063 5.641429 -0.008071  
H -0.876548 6.173577 0.373802  
H 0.000114 5.714113 -1.100993  
H 0.876655 6.173554 0.373881  
C -0.000016 4.173745 2.027623  
H -0.889809 4.688505 2.408486  
H 0.889795 4.688442 2.408531  
H -0.000058 3.153198 2.421126  
C -3.660049 -1.166301 -1.270178  
C -3.510048 -1.364256 -2.652900  
H -2.533051 -1.215822 -3.107302  
C -4.592056 -1.760776 -3.438664  
H -4.458659 -1.906010 -4.507582  
C -5.838581 -1.987543 -2.849867  
H -6.679745 -2.308607 -3.458741  
C -5.995999 -1.811432 -1.474021  
H -6.960987 -1.994591 -1.008016  
C -4.915812 -1.400958 -0.688810  
H -5.051219 -1.268596 0.380400  
C -2.599720 -1.090627 1.421988

C -3.285532 -0.222766 2.285179  
H -3.568657 0.768470 1.943883  
C -3.605433 -0.620829 3.585680  
H -4.132464 0.065013 4.244246  
C -3.249743 -1.892204 4.038452  
H -3.497965 -2.200358 5.050786  
C -2.565346 -2.763637 3.187617  
H -2.277901 -3.752297 3.535995  
C -2.235907 -2.362600 1.893007  
H -1.681031 -3.030767 1.239180  
C 3.659830 -1.166349 -1.270385  
C 3.509639 -1.363703 -2.653181  
H 2.532636 -1.214823 -3.107423  
C 4.591458 -1.760189 -3.439212  
H 4.457914 -1.904953 -4.508176  
C 5.837983 -1.987540 -2.850631  
H 6.678998 -2.308587 -3.459719  
C 5.995581 -1.812028 -1.474734  
H 6.960565 -1.995621 -1.008892  
C 4.915583 -1.401570 -0.689244  
H 5.051145 -1.269676 0.380004  
C 2.599935 -1.090659 1.422013  
C 2.235573 -2.362356 1.893331  
H 1.680110 -3.030299 1.239772  
C 2.565205 -2.763396 3.187899  
H 2.277307 -3.751841 3.536511  
C 3.250373 -1.892232 4.038375  
H 3.498772 -2.200376 5.050669  
C 3.606622 -0.621109 3.585305  
H 4.134253 0.064523 4.243607  
C 3.286505 -0.223048 2.284867  
H 3.570017 0.768006 1.943358

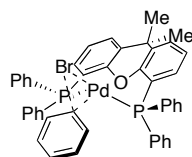

**Transition State 1-TS**

Pd -0.000262 -1.050693 -0.535992  
P -2.115859 0.046179 0.094205  
P 2.115988 0.045086 0.094208  
O 0.000654 2.166876 -0.016852  
C -0.001040 -3.160970 -0.487224  
C -1.223144 -3.672956 -0.027308  
H -2.156879 -3.340831 -0.465322  
C -1.210601 -4.609104 1.011109  
H -2.156060 -4.985467 1.394255  
C -0.001962 -5.073415 1.538276  
H -0.002323 -5.814167 2.333125  
C 1.207135 -4.609840 1.011523

H 2.152235 -4.986785 1.394983  
 C 1.220599 -3.673701 -0.026896  
 H 2.154689 -3.342176 -0.464611  
 C -1.180521 2.643307 -0.554455  
 C -2.288769 1.776159 -0.552467  
 C -3.483873 2.260968 -1.104804  
 H -4.358863 1.621087 -1.124805  
 C -3.558858 3.544676 -1.641975  
 H -4.491109 3.896812 -2.074470  
 C -2.443562 4.380319 -1.617442  
 H -2.523046 5.380272 -2.029883  
 C -1.235160 3.949200 -1.060147  
 C 0.001353 4.838625 -0.894211  
 C 1.237352 3.948507 -1.060281  
 C 2.445934 4.378942 -1.617717  
 H 2.525930 5.378838 -2.030197  
 C 3.560763 3.542679 -1.642342  
 H 4.493163 3.894286 -2.074948  
 C 3.485133 2.259033 -1.105108  
 H 4.359776 1.618680 -1.125152  
 C 2.289820 1.774904 -0.552635  
 C 1.182043 2.642656 -0.554564  
 C 0.001635 6.018833 -1.881272  
 H -0.874285 6.655138 -1.724045  
 H 0.001488 5.679592 -2.922591  
 H 0.877930 6.654642 -1.724132  
 C 0.001593 5.407440 0.555001  
 H -0.888252 6.026011 0.720267  
 H 0.891818 6.025485 0.720180  
 H 0.001392 4.603340 1.297225  
 C -3.718276 -0.720003 -0.433603  
 C -3.748380 -1.358083 -1.685894  
 H -2.847335 -1.392181 -2.293585  
 C -4.918300 -1.964413 -2.146163  
 H -4.924000 -2.453318 -3.116695  
 C -6.070453 -1.955925 -1.356214  
 H -6.978769 -2.436385 -1.710337  
 C -6.047447 -1.335802 -0.105492  
 H -6.938728 -1.330366 0.516935  
 C -4.880613 -0.719792 0.353259  
 H -4.875901 -0.240257 1.327302  
 C -2.350920 0.266853 1.916924  
 C -2.874254 1.432719 2.495771  
 H -3.159457 2.269641 1.865386  
 C -3.031248 1.528684 3.880690  
 H -3.433347 2.440770 4.314536  
 C -2.675747 0.459108 4.703606  
 H -2.798657 0.534835 5.780872  
 C -2.154851 -0.706458 4.136613  
 H -1.869877 -1.541574 4.771232  
 C -1.984944 -0.799173 2.755321  
 H -1.562516 -1.701802 2.321908  
 C 3.718081 -0.721960 -0.433334  
 C 3.747920 -1.360484 -1.685403  
 H 2.846861 -1.394428 -2.293080  
 C 4.917592 -1.967447 -2.145473

H 4.923083 -2.456686 -3.115839  
 C 6.069754 -1.959152 -1.355541  
 H 6.977876 -2.440095 -1.709509  
 C 6.047005 -1.338598 -0.105027  
 H 6.938291 -1.333312 0.517395  
 C 4.880424 -0.721965 0.353524  
 H 4.875917 -0.242113 1.327413  
 C 2.350979 0.265898 1.916923  
 C 1.984281 -0.799778 2.755445  
 H 1.561339 -1.702211 2.322126  
 C 2.154113 -0.706959 4.136740  
 H 1.868569 -1.541804 4.771458  
 C 2.675660 0.458377 4.703607  
 H 2.798513 0.534192 5.780873  
 C 3.031883 1.527615 3.880564  
 H 3.434490 2.439525 4.314311  
 C 2.874961 1.431536 2.495645  
 H 3.160729 2.268191 1.865162  
 Br -0.000524 -2.697824 -2.751393

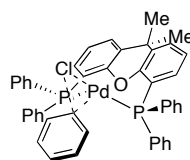

#### Transition State 2-TS

Pd -0.000112 -1.072716 -0.814234  
 P -2.122474 -0.067584 -0.039039  
 P 2.122524 -0.068020 -0.039023  
 O 0.000273 2.052606 0.098819  
 C -0.000389 -3.151404 -0.831319  
 C -1.220935 -3.734399 -0.468372  
 H -2.154338 -3.331164 -0.842572  
 C -1.208640 -4.838990 0.388811  
 H -2.154631 -5.276426 0.698967  
 C -0.000800 -5.388963 0.827435  
 H -0.000962 -6.257052 1.480732  
 C 1.207250 -4.839197 0.389136  
 H 2.153083 -5.276798 0.699539  
 C 1.219960 -3.734610 -0.468048  
 H 2.153531 -3.331543 -0.842013  
 C -1.180566 2.585527 -0.385596  
 C -2.286992 1.722827 -0.494165  
 C -3.476817 2.266506 -1.001876  
 H -4.349396 1.631628 -1.107177  
 C -3.549422 3.603753 -1.387190  
 H -4.477432 4.001817 -1.787767  
 C -2.437576 4.433361 -1.251181  
 H -2.515199 5.474286 -1.545746  
 C -1.234447 3.941864 -0.734359  
 C 0.000568 4.804877 -0.456037  
 C 1.235371 3.941586 -0.734438  
 C 2.438581 4.432802 -1.251341  
 H 2.516423 5.473704 -1.545932  
 C 3.550233 3.602942 -1.387399



H 4.478307 4.000790 -1.788042  
 C 3.477357 2.265721 -1.002042  
 H 4.349791 1.630647 -1.107371  
 C 2.287440 1.722323 -0.494252  
 C 1.181208 2.585268 -0.385654  
 C 0.000683 6.100436 -1.284455  
 H -0.875440 6.711511 -1.047578  
 H 0.000574 5.896632 -2.360480  
 H 0.877007 6.711272 -1.047710  
 C 0.000659 5.184353 1.053872  
 H -0.889358 5.776705 1.296200  
 H 0.890686 5.776739 1.296083  
 H 0.000718 4.292549 1.687905  
 C -3.709655 -0.776491 -0.677325  
 C -3.704071 -1.298069 -1.982883  
 H -2.784381 -1.286488 -2.563107  
 C -4.862900 -1.851953 -2.529538  
 H -4.842211 -2.251534 -3.539880  
 C -6.037451 -1.906818 -1.775576  
 H -6.937007 -2.346853 -2.198060  
 C -6.049299 -1.403498 -0.473020  
 H -6.958569 -1.449373 0.121026  
 C -4.893995 -0.840272 0.073555  
 H -4.914276 -0.451635 1.087200  
 C -2.382719 -0.053236 1.792572  
 C -2.922233 1.037414 2.490975  
 H -3.206424 1.937519 1.954453  
 C -3.097307 0.977197 3.875720  
 H -3.512425 1.832405 4.403044  
 C -2.743125 -0.174919 4.579058  
 H -2.879838 -0.220490 5.656343  
 C -2.206719 -1.266782 3.892550  
 H -1.923666 -2.165953 4.433555  
 C -2.019840 -1.204474 2.511698  
 H -1.588262 -2.052979 1.987513  
 C 3.709592 -0.777312 -0.677152  
 C 3.703951 -1.299082 -1.982634  
 H 2.784276 -1.287439 -2.562880  
 C 4.862706 -1.853230 -2.529182  
 H 4.841975 -2.252955 -3.539466  
 C 6.037231 -1.908170 -1.775187  
 H 6.936727 -2.348407 -2.197588  
 C 6.049131 -1.404663 -0.472703  
 H 6.958380 -1.450599 0.121371  
 C 4.893905 -0.841172 0.073763  
 H 4.914224 -0.452397 1.087355  
 C 2.382631 -0.053584 1.792609  
 C 2.019227 -1.204595 2.511831  
 H 1.587352 -2.052984 1.987703  
 C 2.205949 -1.266820 3.892709  
 H 1.922482 -2.165815 4.433790  
 C 2.742724 -0.175093 4.579144  
 H 2.879318 -0.220596 5.656446  
 C 3.097426 0.976806 3.875709  
 H 3.512828 1.831911 4.402976  
 C 2.922500 1.036936 2.490942

H 3.207083 1.936874 1.954346  
 Cl -0.000060 -2.463386 -2.951942

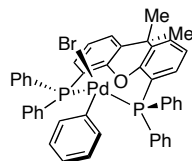

**Complex 2a**

Pd 0.002880 -1.024404 -0.787112  
 P -2.129449 -0.045382 0.204996  
 P 2.127898 -0.029602 0.207983  
 O -0.009630 2.050529 0.047848  
 C 0.011713 -2.872165 -0.064920  
 C -1.195922 -3.519276 0.202065  
 H -2.146435 -3.052250 -0.025901  
 C -1.178812 -4.807255 0.752611  
 H -2.123557 -5.303028 0.962618  
 C 0.029683 -5.452578 1.015109  
 H 0.036728 -6.453786 1.437386  
 C 1.228681 -4.808767 0.708725  
 H 2.179802 -5.305915 0.883765  
 C 1.227369 -3.521005 0.157584  
 H 2.169255 -3.054975 -0.105657  
 C -1.194970 2.540362 -0.469876  
 C -2.303386 1.675146 -0.455081  
 C -3.504886 2.156879 -0.995881  
 H -4.378417 1.514969 -1.008792  
 C -3.584488 3.441830 -1.528075  
 H -4.520100 3.795063 -1.951784  
 C -2.469097 4.278102 -1.510750  
 H -2.554114 5.278815 -1.919897  
 C -1.253505 3.848273 -0.968087  
 C -0.019537 4.742772 -0.809530  
 C 1.223002 3.859103 -0.962230  
 C 2.437197 4.299933 -1.499178  
 H 2.515237 5.301561 -1.907459  
 C 3.559952 3.473551 -1.511789  
 H 4.494397 3.835232 -1.930925  
 C 3.489009 2.187473 -0.981167  
 H 4.368075 1.553139 -0.991007  
 C 2.289335 1.694562 -0.446340  
 C 1.173656 2.550438 -0.464844  
 C -0.022292 5.912031 -1.810071  
 H -0.900981 6.546555 -1.662092  
 H -0.018532 5.560412 -2.847119  
 H 0.850344 6.553951 -1.658186  
 C -0.025494 5.326326 0.633867  
 H -0.918226 5.942790 0.790804  
 H 0.861741 5.949502 0.795385  
 H -0.024432 4.529914 1.384674  
 C -3.712530 -0.835490 -0.324292  
 C -3.737807 -1.445023 -1.591619

H -2.839914 -1.456377 -2.206840  
 C -4.905470 -2.053117 -2.055283  
 H -4.911090 -2.521091 -3.035800  
 C -6.052490 -2.073003 -1.258277  
 H -6.958013 -2.554603 -1.618008  
 C -6.030675 -1.480643 0.006323  
 H -6.918759 -1.498421 0.632886  
 C -4.868069 -0.863451 0.472534  
 H -4.860987 -0.404505 1.456544  
 C -2.337373 0.170749 2.027803  
 C -2.812914 1.354063 2.612939  
 H -3.077763 2.200028 1.986087  
 C -2.950755 1.453455 3.999328  
 H -3.317403 2.377864 4.438182  
 C -2.623246 0.371119 4.817134  
 H -2.732184 0.449320 5.895626  
 C -2.150333 -0.811510 4.243596  
 H -1.889135 -1.657342 4.874020  
 C -1.999927 -0.909896 2.860545  
 H -1.618767 -1.830051 2.426027  
 C 3.717856 -0.804581 -0.323241  
 C 3.750163 -1.405746 -1.594402  
 H 2.853425 -1.420185 -2.211239  
 C 4.923219 -2.002038 -2.059844  
 H 4.934113 -2.463702 -3.043308  
 C 6.068975 -2.018191 -1.260953  
 H 6.978812 -2.490500 -1.622110  
 C 6.040341 -1.434000 0.007296  
 H 6.927472 -1.448818 0.635286  
 C 4.872194 -0.828765 0.475377  
 H 4.859972 -0.376053 1.462204  
 C 2.333255 0.179702 2.031603  
 C 2.009625 -0.910002 2.858010  
 H 1.640486 -1.832485 2.417972  
 C 2.158899 -0.817699 4.241595  
 H 1.908755 -1.670464 4.867145  
 C 2.616688 0.367618 4.821891  
 H 2.724750 0.440999 5.900810  
 C 2.930322 1.458755 4.010339  
 H 3.285200 2.385204 4.454533  
 C 2.793725 1.365611 2.623391  
 H 3.047785 2.218418 2.001347  
 Br 0.009572 -1.885657 -3.260888

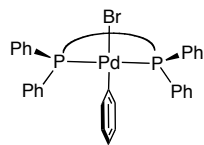

**Complex 2b**

Pd -0.000499 -0.693294 0.791969  
 P -2.275538 -0.254540 0.255185  
 P 2.275619 -0.257420 0.255287  
 O 0.000724 1.475351 -0.983642

C -0.002172 -2.443165 -0.234183  
 C -0.003690 -3.607271 0.549153  
 H -0.003917 -3.538935 1.635239  
 C -0.004956 -4.871031 -0.054317  
 H -0.006133 -5.763269 0.568470  
 C -0.004729 -4.985967 -1.446571  
 H -0.005738 -5.967101 -1.915156  
 C -0.003196 -3.830365 -2.229470  
 H -0.002969 -3.906526 -3.314539  
 C -0.001884 -2.567568 -1.627481  
 H -0.000553 -1.681197 -2.255831  
 C -1.183464 2.178413 -0.819876  
 C -2.300706 1.526851 -0.258622  
 C -3.472700 2.280282 -0.094105  
 H -4.343902 1.815784 0.354268  
 C -3.530869 3.619198 -0.468341  
 H -4.444793 4.185931 -0.316254  
 C -2.416508 4.229653 -1.039697  
 H -2.477513 5.270826 -1.336369  
 C -1.231462 3.516870 -1.238429  
 C 0.002315 4.085716 -1.945820  
 C 1.235743 3.515051 -1.239297  
 C 2.421989 4.226096 -1.041532  
 H 2.484311 5.267145 -1.338370  
 C 3.535845 3.614072 -0.470835  
 H 4.450779 4.179404 -0.319605  
 C 3.475851 2.275367 -0.096168  
 H 4.346640 1.809602 0.351745  
 C 2.302578 1.523672 -0.259686  
 C 1.186014 2.176710 -0.820537  
 C 0.001418 3.580203 -3.418572  
 H -0.887975 3.946096 -3.944680  
 H 0.000329 2.487089 -3.465013  
 H 0.891243 3.944324 -3.945176  
 C 0.003424 5.623429 -1.963636  
 H -0.872621 6.004162 -2.497307  
 H 0.879718 6.002969 -2.497736  
 H 0.003967 6.043835 -0.952468  
 C -3.011505 -1.121838 -1.198381  
 C -3.260848 -0.479198 -2.418646  
 H -3.043725 0.577708 -2.532199  
 C -3.800803 -1.188048 -3.495701  
 H -3.989892 -0.674251 -4.434680  
 C -4.101910 -2.543155 -3.364632  
 H -4.524402 -3.092597 -4.201756  
 C -3.853939 -3.192725 -2.152033  
 H -4.075813 -4.250700 -2.043207  
 C -3.306976 -2.490905 -1.080535  
 H -3.098262 -3.012499 -0.151309  
 C -3.605539 -0.426874 1.526239  
 C -4.953973 -0.611021 1.173012  
 H -5.242549 -0.655476 0.127609  
 C -5.930222 -0.752571 2.160070  
 H -6.968701 -0.894863 1.872551  
 C -5.572803 -0.718093 3.509570  
 H -6.333614 -0.832431 4.277376

C -4.235383 -0.541566 3.867647  
 H -3.948753 -0.515095 4.915433  
 C -3.254104 -0.399273 2.884928  
 H -2.217702 -0.245234 3.167588  
 C 3.010758 -1.126551 -1.197601  
 C 3.302518 -2.496392 -1.079384  
 H 3.091162 -3.017419 -0.150442  
 C 3.848995 -3.199627 -2.150193  
 H 4.067908 -4.258190 -2.041137  
 C 4.100113 -2.550680 -3.362493  
 H 4.522178 -3.101207 -4.199120  
 C 3.802778 -1.194782 -3.493899  
 H 3.994406 -0.681472 -4.432630  
 C 3.263347 -0.484516 -2.417499  
 H 3.049233 0.572976 -2.531282  
 C 3.606026 -0.428675 1.526225  
 C 4.953612 -0.618705 1.172986  
 H 5.241453 -0.668693 0.127646  
 C 5.929998 -0.758840 2.160129  
 H 6.967808 -0.905890 1.872576  
 C 5.573639 -0.716588 3.509687  
 H 6.334594 -0.829597 4.277544  
 C 4.237054 -0.533768 3.867753  
 H 3.951173 -0.501099 4.915575  
 C 3.255577 -0.393126 2.885002  
 H 2.219808 -0.234594 3.167623  
 Br -0.000650 1.277040 2.608033

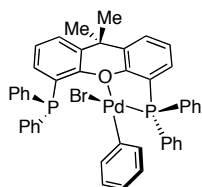

### Complex 2c

Pd 0.682851 -0.545008 -1.128300  
 P -2.233380 -0.649555 0.319256  
 P 2.040797 0.208175 0.611108  
 O -0.374875 1.599571 -0.422207  
 C 1.654303 -2.263711 -1.363681  
 C 1.194896 -3.361304 -0.628355  
 H 0.349487 -3.256178 0.046279  
 C 1.817959 -4.607083 -0.773745  
 H 1.453122 -5.457473 -0.201855  
 C 2.893084 -4.758982 -1.650739  
 H 3.374545 -5.726851 -1.764009  
 C 3.337255 -3.661673 -2.390574  
 H 4.163384 -3.773091 -3.089130  
 C 2.719811 -2.413366 -2.253126  
 H 3.058028 -1.577071 -2.854592  
 C -1.706387 2.010694 -0.519415  
 C -2.700157 1.056681 -0.253908  
 C -4.032665 1.465253 -0.409017  
 H -4.827611 0.746215 -0.239049

C -4.346517 2.775352 -0.763115  
 H -5.384966 3.075068 -0.872318  
 C -3.329501 3.705995 -0.971094  
 H -3.591527 4.724504 -1.235486  
 C -1.983902 3.339317 -0.862469  
 C -0.815499 4.284284 -1.160280  
 C 0.353525 3.887932 -0.251523  
 C 1.301501 4.779665 0.261354  
 H 1.171293 5.846108 0.113485  
 C 2.434995 4.324784 0.938330  
 H 3.159759 5.037951 1.319836  
 C 2.660655 2.957819 1.082814  
 H 3.573965 2.603853 1.550804  
 C 1.723435 2.028617 0.608705  
 C 0.564993 2.525467 -0.008867  
 C -0.374560 4.061545 -2.637787  
 H -1.192712 4.330999 -3.315109  
 H -0.113864 3.015842 -2.828005  
 H 0.494906 4.686113 -2.873912  
 C -1.205374 5.761731 -0.979404  
 H -2.011252 6.036161 -1.665786  
 H -0.361794 6.416384 -1.218503  
 H -1.533328 5.976775 0.043522  
 C -3.680022 -1.647753 -0.265384  
 C -3.609878 -2.160648 -1.573058  
 H -2.744761 -1.942957 -2.195299  
 C -4.648337 -2.943106 -2.079636  
 H -4.580977 -3.328634 -3.093500  
 C -5.760670 -3.238079 -1.287913  
 H -6.564242 -3.854907 -1.682232  
 C -5.833468 -2.741850 0.014815  
 H -6.694678 -2.968969 0.638509  
 C -4.801446 -1.949901 0.523933  
 H -4.869547 -1.572994 1.539920  
 C -2.544260 -0.529146 2.144564  
 C -3.028729 0.608667 2.807770  
 H -3.284193 1.498789 2.242044  
 C -3.198068 0.608277 4.195257  
 H -3.576130 1.499932 4.689492  
 C -2.895935 -0.530296 4.942288  
 H -3.035217 -0.530893 6.020277  
 C -2.409596 -1.669338 4.295031  
 H -2.165680 -2.560585 4.867278  
 C -2.224875 -1.663227 2.913591  
 H -1.830318 -2.550600 2.423940  
 C 3.863092 0.131958 0.361387  
 C 4.357466 0.414883 -0.922911  
 H 3.663600 0.640261 -1.728456  
 C 5.729052 0.406652 -1.168551  
 H 6.098484 0.628760 -2.165927  
 C 6.623861 0.100776 -0.139462  
 H 7.692872 0.085555 -0.333818  
 C 6.140259 -0.190553 1.136104  
 H 6.830575 -0.431969 1.939932  
 C 4.766109 -0.172662 1.389390  
 H 4.402650 -0.400235 2.386112

C 1.776707 -0.372600 2.332552  
 C 1.932032 -1.745199 2.597822  
 H 2.192467 -2.428707 1.794338  
 C 1.752795 -2.234601 3.890930  
 H 1.883935 -3.295508 4.086413  
 C 1.399982 -1.367399 4.928338  
 H 1.256083 -1.751693 5.934532  
 C 1.226679 -0.007979 4.667536  
 H 0.942046 0.669647 5.467633  
 C 1.416617 0.490432 3.377032  
 H 1.284270 1.550666 3.186623  
 Br -0.436382 -0.735535 -3.433804

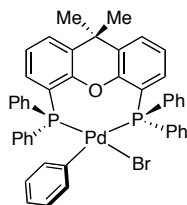

**Complex 2d**

Pd 0.529538 -1.291506 -0.316895  
 P -1.993910 -0.592734 -0.011542  
 P 1.792527 0.692770 0.231959  
 O -0.705941 2.080621 -0.220930  
 C 2.239628 -2.173941 -0.947200  
 C 3.151147 -2.824983 -0.113397  
 H 2.987857 -2.860301 0.959219  
 C 4.271415 -3.457130 -0.661254  
 H 4.973258 -3.965795 -0.004077  
 C 4.485907 -3.448661 -2.041505  
 H 5.355486 -3.945941 -2.463984  
 C 3.567563 -2.809093 -2.875671  
 H 3.715420 -2.806558 -3.953642  
 C 2.444082 -2.174119 -2.330925  
 H 1.730777 -1.690914 -2.995098  
 C -1.948919 2.125615 -0.816460  
 C -2.719098 0.958737 -0.741587  
 C -4.002920 1.006003 -1.308439  
 H -4.636197 0.127198 -1.273559  
 C -4.462291 2.159947 -1.939796  
 H -5.455834 2.175345 -2.378577  
 C -3.649671 3.291505 -2.021924  
 H -4.022955 4.174661 -2.529347  
 C -2.372633 3.299467 -1.453915  
 C -1.441340 4.517776 -1.426355  
 C 0.000858 4.000206 -1.487933  
 C 1.069567 4.676092 -2.086690  
 H 0.893254 5.602138 -2.623635  
 C 2.371669 4.184942 -1.988697  
 H 3.190174 4.730172 -2.449728  
 C 2.635188 3.006579 -1.289604  
 H 3.654759 2.650072 -1.206471

C 1.590121 2.281310 -0.701346  
 C 0.296204 2.804641 -0.824923  
 C -1.747348 5.502416 -2.568230  
 H -2.769232 5.884895 -2.488127  
 H -1.628823 5.034509 -3.551248  
 H -1.086319 6.372834 -2.516871  
 C -1.635217 5.253116 -0.068310  
 H -2.667441 5.609602 0.025762  
 H -0.961311 6.115197 -0.002249  
 H -1.424583 4.589174 0.775797  
 C -3.114777 -1.838670 -0.791429  
 C -2.815325 -2.258897 -2.096555  
 H -1.913312 -1.902279 -2.585810  
 C -3.652198 -3.150837 -2.763587  
 H -3.402579 -3.472132 -3.771126  
 C -4.793889 -3.648397 -2.130104  
 H -5.440114 -4.353861 -2.645713  
 C -5.094522 -3.243951 -0.829682  
 H -5.976947 -3.631408 -0.327039  
 C -4.262265 -2.339912 -0.163508  
 H -4.507865 -2.034038 0.848340  
 C -2.543768 -0.542578 1.752131  
 C -3.187814 0.566074 2.318323  
 H -3.412270 1.435560 1.708780  
 C -3.551792 0.561189 3.667232  
 H -4.049568 1.429273 4.091749  
 C -3.286874 -0.553861 4.462513  
 H -3.578697 -0.559618 5.509595  
 C -2.646777 -1.664483 3.904922  
 H -2.439875 -2.539698 4.515505  
 C -2.267744 -1.659257 2.562538  
 H -1.763487 -2.522838 2.135700  
 C 3.633865 0.534643 0.314594  
 C 4.333123 0.658790 1.523804  
 H 3.799681 0.861296 2.445460  
 C 5.723208 0.521238 1.557049  
 H 6.247226 0.617553 2.504299  
 C 6.433582 0.264395 0.385277  
 H 7.514642 0.156952 0.413290  
 C 5.746186 0.136132 -0.823964  
 H 6.286172 -0.080842 -1.741200  
 C 4.358693 0.262152 -0.858750  
 H 3.839335 0.121862 -1.800408  
 C 1.343689 1.176887 1.956924  
 C 0.901901 0.186828 2.846083  
 H 0.781715 -0.835456 2.497681  
 C 0.602194 0.509341 4.171435  
 H 0.246838 -0.266064 4.843346  
 C 0.737506 1.823283 4.620470  
 H 0.498183 2.075009 5.650263  
 C 1.177839 2.815965 3.741465  
 H 1.286285 3.841252 4.085598  
 C 1.481052 2.495918 2.418043  
 H 1.828527 3.274192 1.745370  
 Br -0.279334 -3.740050 -0.020454

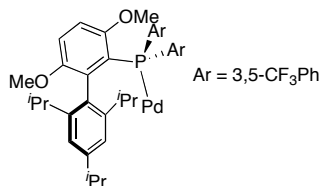

### Complex 3

C -4.292881 -1.336981 -0.845269  
 C -4.557232 -0.262333 -1.685198  
 C -3.991466 0.990102 -1.355255  
 C -3.189374 1.170448 -0.204375  
 C -2.853109 0.006294 0.575463  
 C -3.431124 -1.237961 0.266296  
 H -4.739983 -2.300819 -1.076671  
 H -4.276218 1.866331 -1.930109  
 C -1.868923 0.125524 1.712258  
 C -0.461436 0.132915 1.528647  
 C -2.390580 0.193928 3.027106  
 C 0.381442 0.168732 2.671823  
 C -1.542202 0.264933 4.129540  
 C -0.159605 0.245359 3.953590  
 H -1.939813 0.321779 5.135871  
 H 0.482638 0.274203 4.825681  
 P 0.266531 0.155830 -0.197872  
 C -3.121349 -2.507293 1.056612  
 H -2.403429 -2.250960 1.842107  
 C -5.464413 -0.418998 -2.897310  
 H -5.737150 -1.481432 -2.957075  
 C -4.749518 -0.051048 -4.211548  
 H -4.458148 1.006021 -4.224459  
 H -3.842764 -0.650649 -4.349135  
 H -5.408102 -0.224594 -5.071054  
 C -6.772056 0.383003 -2.739787  
 H -7.438988 0.206029 -3.592138  
 H -7.303799 0.098006 -1.825310  
 H -6.575004 1.460711 -2.690450  
 C -2.941835 2.587203 0.330683  
 H -2.065892 2.545123 0.987361  
 C -2.654098 3.636280 -0.758134  
 H -2.309434 4.570437 -0.299837  
 H -1.879211 3.288535 -1.452892  
 H -3.548608 3.873111 -1.346530  
 C -4.143000 3.037701 1.191163  
 H -3.943922 4.017331 1.642850  
 H -5.045535 3.128075 0.574316  
 H -4.350492 2.320077 1.989317  
 C -2.460372 -3.584639 0.173183  
 H -2.116771 -4.427042 0.784374  
 H -3.159826 -3.975323 -0.575264  
 H -1.593649 -3.181234 -0.360989  
 C -4.378568 -3.062198 1.754119  
 H -5.138168 -3.368159 1.024983  
 H -4.125924 -3.942227 2.358282  
 H -4.825483 -2.307995 2.409421

O -3.757767 0.179726 3.129940  
 O 1.724292 0.094443 2.441771  
 C -4.337820 0.241231 4.423530  
 H -4.067479 1.169362 4.944517  
 H -5.417336 0.218527 4.265620  
 H -4.043222 -0.618883 5.039248  
 C 2.627750 0.283548 3.523097  
 H 2.588799 -0.556477 4.228356  
 H 3.620159 0.341611 3.073980  
 H 2.419627 1.219031 4.057077  
 C 1.617908 1.428668 -0.100242  
 C 2.975859 1.137034 0.068558  
 C 1.238672 2.767664 -0.255742  
 C 3.923703 2.161869 0.102725  
 H 3.300429 0.110485 0.192291  
 C 2.187005 3.791101 -0.212081  
 H 0.194122 3.010213 -0.420896  
 C 3.538468 3.496065 -0.032343  
 H 4.276419 4.288116 -0.001317  
 C 1.192567 -1.442083 -0.329137  
 C 1.880073 -1.698623 -1.528924  
 C 1.142337 -2.450027 0.637150  
 C 2.521052 -2.916633 -1.735386  
 H 1.908586 -0.943116 -2.308192  
 C 1.767458 -3.682924 0.414276  
 H 0.610844 -2.287582 1.567802  
 C 2.465311 -3.922812 -0.764266  
 H 2.956197 -4.874370 -0.930060  
 C 5.359998 1.803066 0.373533  
 C 1.737239 5.211766 -0.430224  
 C 3.222966 -3.197598 -3.038920  
 C 1.672504 -4.734346 1.488042  
 F 2.651642 6.105245 0.003960  
 F 1.519337 5.467666 -1.739704  
 F 0.576397 5.470314 0.215579  
 F 6.203442 2.819764 0.106440  
 F 5.543305 1.469625 1.680194  
 F 5.756452 0.736162 -0.351574  
 F 4.371494 -3.882808 -2.843307  
 F 3.529807 -2.064575 -3.703670  
 F 2.455044 -3.948437 -3.860793  
 F 2.244700 -4.315933 2.640908  
 F 2.273368 -5.887906 1.134094  
 F 0.382456 -5.022005 1.782844  
 Pd -1.435842 0.618594 -1.617064

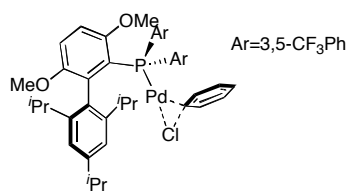

### Transition State 3-TS

C 2.954601 -0.083568 0.835238  
 C 3.362082 -1.419736 0.595980  
 C 4.325332 -1.664603 -0.390279  
 C 4.906414 -0.642277 -1.142656  
 C 4.490727 0.667412 -0.887273  
 C 3.534271 0.971779 0.086410  
 C 2.056372 0.240985 2.004445  
 C 0.650762 0.380843 1.939798  
 C -0.071141 0.738814 3.110512  
 C 0.589980 0.921459 4.321793  
 C 1.974641 0.771866 4.389744  
 C 2.705176 0.447035 3.249409  
 H 4.637731 -2.689202 -0.577055  
 H 4.929608 1.482916 -1.456227  
 H 0.045198 1.196231 5.216990  
 H 2.469479 0.926126 5.341210  
 P -0.239040 0.073692 0.340427  
 Pd 0.941288 -0.773918 -1.451943  
 C -0.291276 -1.593428 -3.113108  
 C -1.040241 -0.612276 -3.782837  
 C -0.871720 -2.817929 -2.746362  
 C -2.406121 -0.824521 -3.978791  
 H -0.567290 0.303265 -4.120730  
 C -2.240377 -3.003150 -2.947159  
 H -0.268845 -3.599418 -2.297445  
 C -3.014348 -2.012111 -3.557540  
 H -2.993461 -0.046346 -4.458113  
 H -2.695262 -3.933412 -2.617930  
 Cl 1.650580 -1.684750 -3.617155  
 H -4.076174 -2.169885 -3.721869  
 C 3.184401 2.438263 0.335671  
 C 2.676014 3.148077 -0.934410  
 C 4.376415 3.198127 0.951774  
 H 2.373119 2.470654 1.069517  
 H 1.860792 2.585685 -1.402475  
 H 2.303697 4.149161 -0.687605  
 H 3.471801 3.261042 -1.679867  
 H 4.717091 2.712404 1.871982  
 H 5.224549 3.232393 0.257726  
 H 4.094783 4.231732 1.187127  
 C 2.821703 -2.595687 1.409323  
 C 3.875452 -3.112076 2.410819  
 C 2.315301 -3.750192 0.522800  
 H 1.967054 -2.234471 1.991778  
 H 4.222936 -2.309862 3.068326  
 H 3.457934 -3.915767 3.029691

H 4.748556 -3.514491 1.882946  
 H 1.643997 -3.378683 -0.259976  
 H 3.139979 -4.273563 0.025168  
 H 1.772169 -4.487139 1.126093  
 C 5.973308 -0.951905 -2.184094  
 C 7.349002 -0.400018 -1.760296  
 C 5.585979 -0.448156 -3.586842  
 H 6.060464 -2.045621 -2.239710  
 H 7.649588 -0.790817 -0.781739  
 H 8.118738 -0.677132 -2.490712  
 H 7.332091 0.694441 -1.692067  
 H 4.617277 -0.852504 -3.898295  
 H 5.515130 0.645800 -3.613033  
 H 6.339976 -0.748779 -4.324290  
 O -1.416660 0.913070 2.967401  
 O 4.067973 0.315039 3.243574  
 C -2.216940 1.118372 4.124944  
 H -3.251736 1.070468 3.783395  
 H -2.048787 0.330914 4.869906  
 H -2.020416 2.098507 4.577643  
 C 4.773135 0.518232 4.457934  
 H 5.826467 0.366089 4.217044  
 H 4.632475 1.537521 4.841615  
 H 4.469661 -0.203675 5.227859  
 C -1.658172 -1.035421 0.792180  
 C -2.955401 -0.590490 1.068285  
 C -1.410966 -2.412873 0.792908  
 C -3.971213 -1.502218 1.361717  
 H -3.179640 0.469439 1.062424  
 C -2.429388 -3.322572 1.085061  
 H -0.420542 -2.780045 0.546635  
 C -3.717246 -2.874056 1.374457  
 H -4.509213 -3.578088 1.597707  
 C -1.044490 1.685161 -0.072185  
 C -1.909657 1.720347 -1.175526  
 C -0.722698 2.889758 0.564689  
 C -2.443497 2.929901 -1.622982  
 H -2.155373 0.803853 -1.702407  
 C -1.247960 4.098368 0.102429  
 H -0.061427 2.893686 1.423057  
 C -2.113456 4.128794 -0.991301  
 H -2.525413 5.067148 -1.341742  
 C -3.336677 2.916311 -2.836385  
 C -0.819593 5.384972 0.757219  
 C -5.332116 -0.965791 1.716045  
 C -2.124752 -4.794580 1.006904  
 F -3.098935 -5.547909 1.556020  
 F -1.980470 -5.201781 -0.278852  
 F -0.967868 -5.098439 1.638562  
 F -6.264650 -1.935589 1.790899  
 F -5.312420 -0.338665 2.923048  
 F -5.757836 -0.052022 0.818890  
 F -4.305080 1.980329 -2.729977  
 F -2.635879 2.619769 -3.959234  
 F -3.937639 4.105271 -3.043400  
 F -1.733705 6.364239 0.594606

F 0.345237 5.841825 0.236438  
F -0.617702 5.229495 2.084494

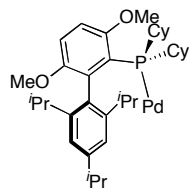

#### Complex 4

C -3.284597 -1.446947 -0.539798  
C -4.045155 -0.365225 -0.985372  
C -3.559192 0.917935 -0.709176  
C -2.356023 1.146343 -0.036155  
C -1.572416 0.032392 0.416174  
C -2.086588 -1.296049 0.190749  
H -3.659756 -2.453117 -0.712720  
H -4.137359 1.779032 -1.034474  
C -0.454724 0.267218 1.427910  
C 0.935766 0.310149 1.141354  
C -0.886405 0.456307 2.768546  
C 1.839022 0.557263 2.207686  
C 0.025331 0.695179 3.791298  
C 1.389683 0.748320 3.510910  
H -0.305879 0.838511 4.812871  
H 2.084019 0.933629 4.321591  
P 1.538418 -0.064141 -0.612512  
C -1.506257 -2.530540 0.889747  
H -0.529935 -2.252600 1.298100  
C -5.349887 -0.585030 -1.738011  
H -5.506832 -1.671080 -1.800316  
C -5.278813 -0.048484 -3.181092  
H -5.131150 1.038078 -3.193209  
H -4.446438 -0.503634 -3.729705  
H -6.206559 -0.265366 -3.725210  
C -6.557759 0.010268 -0.989072  
H -7.492314 -0.212197 -1.518873  
H -6.633438 -0.397588 0.024985  
H -6.476027 1.100557 -0.904414  
C -1.933598 2.594998 0.212452  
H -0.904976 2.586135 0.586628  
C -1.948228 3.440052 -1.077761  
H -1.507506 4.427378 -0.892154  
H -1.385093 2.956352 -1.882502  
H -2.969560 3.603218 -1.441297  
C -2.811484 3.270371 1.286731  
H -2.464859 4.293035 1.482675  
H -3.855745 3.328798 0.956050  
H -2.791045 2.709854 2.224630  
C -1.281343 -3.717514 -0.064353  
H -0.790186 -4.543029 0.465577  
H -2.225385 -4.104841 -0.465452  
H -0.649897 -3.422516 -0.910838  
C -2.400924 -2.960218 2.072154  
H -3.380478 -3.302898 1.716797

H -1.937025 -3.786741 2.625077  
H -2.568731 -2.129198 2.762633  
O -2.240336 0.379571 2.983874  
O 3.172760 0.585718 1.886617  
C -2.725430 0.549229 4.304687  
H -2.482691 1.544598 4.700863  
H -3.809681 0.443328 4.238074  
H -2.327451 -0.216178 4.984665  
C 4.121532 0.770268 2.922939  
H 4.059610 -0.028309 3.674014  
H 5.100361 0.737112 2.440580  
H 3.997156 1.742031 3.419108  
Pd -0.466932 -0.671424 -1.505995  
C 2.491472 1.461495 -1.262560  
C 1.731593 2.762936 -0.947304  
C 3.990720 1.628598 -0.941610  
H 2.408473 1.296753 -2.347112  
C 2.330675 3.968597 -1.691398  
H 1.767732 2.948805 0.135465  
H 0.677340 2.653155 -1.216266  
C 4.586350 2.825022 -1.707910  
H 4.118086 1.784899 0.133781  
H 4.550550 0.722660 -1.199362  
C 3.830018 4.126121 -1.404517  
H 1.789197 4.882538 -1.413753  
H 2.181075 3.833430 -2.772862  
H 5.649530 2.933429 -1.454724  
H 4.542785 2.624278 -2.788863  
H 4.246818 4.956850 -1.988768  
H 3.970551 4.386358 -0.344569  
C 2.890036 -1.369385 -0.406415  
C 2.441632 -2.557422 0.463711  
C 3.324223 -1.871412 -1.800715  
H 3.747028 -0.897804 0.084852  
C 3.545792 -3.623864 0.571417  
H 1.544830 -3.010128 0.020982  
H 2.161571 -2.212106 1.465389  
C 4.430158 -2.936619 -1.699096  
H 2.448262 -2.294499 -2.312298  
H 3.671392 -1.037874 -2.424460  
C 3.999188 -4.113014 -0.811587  
H 3.188340 -4.468006 1.175861  
H 4.408810 -3.199891 1.106646  
H 4.695547 -3.292833 -2.703060  
H 5.338968 -2.479626 -1.279313  
H 4.818007 -4.837510 -0.712199  
H 3.166967 -4.643934 -1.296955

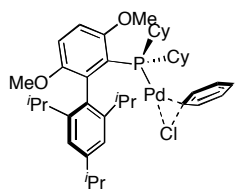

#### Transition State 4-TS

C -2.078329 0.590547 -0.230994  
 C -2.377270 -0.224156 -1.352496  
 C -3.206616 -1.338279 -1.178843  
 C -3.767061 -1.671992 0.055081  
 C -3.466552 -0.850641 1.145038  
 C -2.644150 0.274040 1.030064  
 C -1.384661 1.918390 -0.439360  
 C 0.007271 2.164933 -0.335946  
 C 0.470977 3.484100 -0.607721  
 C -0.407940 4.504563 -0.957941  
 C -1.776262 4.258136 -1.042685  
 C -2.262086 2.982770 -0.785336  
 H -3.433671 -1.963205 -2.039544  
 H -3.900758 -1.080570 2.114335  
 H -0.044320 5.503820 -1.163438  
 H -2.441861 5.069612 -1.311546  
 P 1.166436 0.760021 0.162253  
 Pd 0.238726 -1.394780 0.023935  
 C 2.731621 0.982821 -0.867434  
 C 3.763947 -0.114205 -0.533897  
 C 2.394482 0.965656 -2.372443  
 H 3.167838 1.953634 -0.625619  
 C 5.027773 0.021711 -1.401279  
 H 3.319088 -1.102199 -0.692769  
 H 4.045447 -0.065631 0.524353  
 C 3.659446 1.097257 -3.237145  
 H 1.885939 0.022665 -2.615944  
 H 1.694198 1.773644 -2.614251  
 C 4.690763 0.011742 -2.898564  
 H 5.722027 -0.793821 -1.161784  
 H 5.546879 0.960040 -1.152526  
 H 3.388114 1.049560 -4.300098  
 H 4.109252 2.088457 -3.073949  
 H 5.600656 0.148283 -3.497684  
 H 4.280053 -0.972635 -3.166122  
 C 1.623498 1.207781 1.960525  
 C 1.979713 -0.062065 2.766843  
 C 2.693117 2.297131 2.184553  
 H 0.671528 1.588578 2.358511  
 C 2.170920 0.245947 4.261391  
 H 2.903558 -0.503951 2.369711  
 H 1.197717 -0.816791 2.624548  
 C 2.881620 2.599933 3.683323  
 H 3.652847 1.959341 1.768429  
 H 2.426728 3.212320 1.652581  
 C 3.225066 1.338631 4.486073  
 H 2.451383 -0.671918 4.794713  
 H 1.211863 0.573846 4.689049

H 3.664901 3.359437 3.809167  
 H 1.954551 3.039945 4.080626  
 H 3.310710 1.576116 5.554418  
 H 4.209462 0.963870 4.167876  
 C 1.429879 -3.310499 -0.108985  
 C 2.297996 -3.507745 0.979388  
 C 1.877724 -3.524909 -1.424532  
 C 3.636060 -3.809660 0.734777  
 H 1.924843 -3.413792 1.993107  
 C 3.222154 -3.828094 -1.644229  
 H 1.182171 -3.450572 -2.253212  
 C 4.109974 -3.966769 -0.573044  
 H 4.311841 -3.935024 1.577483  
 H 3.571261 -3.971263 -2.664151  
 Cl -0.454515 -3.750790 0.210587  
 H 5.150918 -4.219590 -0.752290  
 C -2.439748 1.158148 2.260120  
 C -1.952926 0.364778 3.487437  
 C -3.724975 1.940664 2.601233  
 H -1.666439 1.895460 2.019673  
 H -1.055810 -0.217659 3.255148  
 H -1.720119 1.047823 4.313899  
 H -2.717215 -0.333502 3.847949  
 H -4.067471 2.527239 1.743797  
 H -4.534918 1.257029 2.883336  
 H -3.551976 2.621348 3.444276  
 C -1.883808 0.108008 -2.760991  
 C -3.049652 0.554572 -3.667044  
 C -1.109999 -1.057101 -3.405496  
 H -1.190537 0.951476 -2.685744  
 H -3.593384 1.393680 -3.222343  
 H -2.675986 0.863789 -4.651249  
 H -3.764798 -0.262153 -3.823756  
 H -0.282875 -1.373065 -2.759341  
 H -1.754362 -1.927483 -3.577486  
 H -0.700006 -0.751751 -4.376425  
 C -4.718409 -2.855196 0.182698  
 C -6.172959 -2.376292 0.366367  
 C -4.318083 -3.830074 1.304531  
 H -4.671904 -3.408827 -0.765188  
 H -6.480921 -1.720240 -0.455435  
 H -6.862524 -3.228775 0.401274  
 H -6.286107 -1.814609 1.301658  
 H -3.292744 -4.189386 1.169871  
 H -4.378864 -3.355006 2.291000  
 H -4.988992 -4.697762 1.315564  
 O 1.820355 3.712131 -0.511866  
 O -3.595848 2.666444 -0.852933  
 C 2.330943 4.992748 -0.839370  
 H 3.413672 4.919401 -0.720267  
 H 2.097580 5.267039 -1.876461  
 H 1.945873 5.768903 -0.164764  
 C -4.514638 3.688945 -1.197528  
 H -5.499691 3.219134 -1.183340  
 H -4.495862 4.512941 -0.471354  
 H -4.318972 4.089483 -2.201516



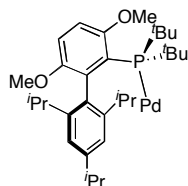

### Complex 5

C 2.593203 -0.870185 -1.163429  
 C 3.443307 -0.831959 -0.033942  
 C 3.149703 0.079474 0.971465  
 C 1.984971 0.879771 0.959363  
 C 1.100577 0.789629 -0.134984  
 C 1.462444 -0.017262 -1.281885  
 H 2.912036 -1.445196 -2.028692  
 H 3.821872 0.159639 1.821054  
 C -0.222538 1.526593 -0.150776  
 C -1.498148 0.915752 0.063821  
 C -0.160789 2.923394 -0.398789  
 C -2.638536 1.763025 0.086764  
 C -1.300959 3.717862 -0.368991  
 C -2.539179 3.137119 -0.114091  
 H -1.246917 4.785518 -0.544414  
 H -3.418448 3.769015 -0.092001  
 P -1.670309 -0.980580 0.218894  
 C 0.906964 0.300009 -2.677994  
 H -0.101330 0.707301 -2.548366  
 C 4.667437 -1.736351 0.031036  
 H 4.678754 -2.331435 -0.892924  
 C 4.591048 -2.724486 1.210884  
 H 4.586070 -2.195041 2.171047  
 H 3.678333 -3.328497 1.158113  
 H 5.453212 -3.403102 1.206940  
 C 5.979283 -0.929059 0.074077  
 H 6.847989 -1.598759 0.056058  
 H 6.054101 -0.249084 -0.781786  
 H 6.044204 -0.324677 0.986596  
 C 1.769643 1.822935 2.146180  
 H 0.750074 2.219485 2.087360  
 C 1.924168 1.139150 3.520853  
 H 1.629166 1.832386 4.318424  
 H 1.311698 0.239356 3.607499  
 H 2.964912 0.853332 3.712417  
 C 2.743157 3.020580 2.077993  
 H 2.539461 3.729404 2.891073  
 H 3.780764 2.681404 2.185404  
 H 2.656271 3.545470 1.125204  
 C 0.802659 -0.910498 -3.620761  
 H 0.302491 -0.617100 -4.551954  
 H 1.790293 -1.299127 -3.896353  
 H 0.234477 -1.726816 -3.161463  
 C 1.771815 1.397303 -3.338496  
 H 2.786566 1.025231 -3.526707  
 H 1.340071 1.698518 -4.301459  
 H 1.848804 2.279361 -2.698116

O 1.083132 3.432144 -0.681854  
 O -3.852098 1.162816 0.301274  
 C 1.191115 4.807014 -1.009267  
 H 0.890498 5.450419 -0.171303  
 H 2.246301 4.977436 -1.230508  
 H 0.589869 5.060288 -1.892804  
 C -5.009334 1.972342 0.415935  
 H -5.221137 2.513659 -0.515646  
 H -5.833243 1.287591 0.626222  
 H -4.919380 2.692145 1.239954  
 Pd 0.429395 -1.764968 -0.395067  
 C -2.170954 -1.340027 2.048602  
 C -3.054397 -1.592481 -1.015437  
 C -4.498579 -1.712706 -0.493945  
 H -5.134329 -2.088781 -1.307936  
 H -4.584069 -2.428151 0.329455  
 H -4.901532 -0.756415 -0.167122  
 C -2.603386 -3.008090 -1.449799  
 H -1.595933 -2.993291 -1.877383  
 H -2.592748 -3.711698 -0.611151  
 H -3.303655 -3.395028 -2.203464  
 C -3.037903 -0.686116 -2.261470  
 H -2.028030 -0.573470 -2.667966  
 H -3.659331 -1.141612 -3.044626  
 H -3.440221 0.307650 -2.051624  
 C -3.441540 -0.680386 2.614238  
 H -4.344603 -0.959906 2.069549  
 H -3.568263 -1.002370 3.657740  
 H -3.365358 0.409273 2.610410  
 C -2.276703 -2.873019 2.193406  
 H -1.377308 -3.371505 1.815065  
 H -2.386311 -3.129008 3.255892  
 H -3.143493 -3.285331 1.667937  
 C -0.975257 -0.862597 2.892582  
 H -0.040123 -1.319832 2.553310  
 H -0.862875 0.224749 2.843882  
 H -1.135205 -1.136234 3.944570

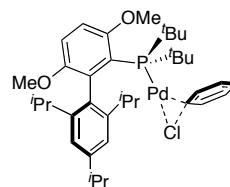

### Transition State 5-TS

C -3.063588 -0.643062 1.373442  
 C -3.566746 -1.334836 0.272995  
 C -3.079815 -0.976221 -0.986581  
 C -2.125549 0.028758 -1.167270  
 C -1.601852 0.707862 -0.029808  
 C -2.110590 0.375474 1.255054  
 H -3.442861 -0.893472 2.361441  
 H -3.472627 -1.480842 -1.864824  
 C -0.811636 1.994604 -0.204580  
 C 0.599295 2.173259 -0.159921

C -1.644834 3.135073 -0.392153  
 C 1.105601 3.497438 -0.279287  
 C -1.109088 4.405825 -0.558788  
 C 0.269321 4.587072 -0.498243  
 H -1.747270 5.266778 -0.717573  
 H 0.671514 5.586900 -0.605202  
 P 1.758438 0.693774 0.080130  
 Pd 0.459559 -1.256289 0.350647  
 C 1.302104 -3.370506 0.136291  
 C 1.397241 -3.717069 -1.224030  
 C 2.354845 -3.671928 1.018719  
 C 2.589740 -4.254979 -1.709237  
 H 0.549807 -3.563923 -1.883416  
 C 3.536034 -4.208999 0.510745  
 H 2.246313 -3.472045 2.078896  
 C 3.666920 -4.498927 -0.852677  
 H 2.668011 -4.496238 -2.766686  
 H 4.358682 -4.413034 1.192159  
 H 4.586665 -4.931102 -1.235845  
 C -1.720718 1.135847 2.521329  
 H -0.912069 1.825746 2.264984  
 C -1.747244 0.402971 -2.599934  
 H -0.871427 1.055806 -2.554755  
 C -1.376476 -0.822854 -3.457675  
 H -0.938673 -0.501976 -4.410573  
 H -0.655306 -1.466292 -2.945796  
 H -2.257714 -1.430504 -3.693873  
 C -2.875865 1.196050 -3.293010  
 H -2.571550 1.490921 -4.305229  
 H -3.782985 0.585508 -3.380383  
 H -3.133739 2.096313 -2.730304  
 C -1.203449 0.200184 3.631189  
 H -0.832315 0.784306 4.482604  
 H -1.996600 -0.456856 4.006309  
 H -0.392214 -0.437127 3.263169  
 C -2.894820 1.990757 3.042516  
 H -3.735290 1.359084 3.354389  
 H -2.582672 2.584153 3.911083  
 H -3.260266 2.673419 2.269427  
 C -4.660526 -2.380989 0.444390  
 H -4.748757 -2.579524 1.521496  
 C -4.332425 -3.717786 -0.244238  
 H -3.374535 -4.117880 0.102638  
 H -5.113739 -4.458167 -0.033439  
 H -4.272425 -3.605233 -1.333437  
 C -6.021302 -1.836495 -0.036483  
 H -6.284056 -0.909743 0.485752  
 H -5.998954 -1.618897 -1.111315  
 H -6.818883 -2.568433 0.141439  
 Cl -0.500161 -3.464205 0.884631  
 O -2.997554 2.902014 -0.390701  
 O 2.457963 3.656156 -0.136252  
 C -3.874930 4.003186 -0.551166  
 H -4.882832 3.587015 -0.504815  
 H -3.750171 4.741960 0.252098  
 H -3.732911 4.498414 -1.521453

C 3.026053 4.937719 -0.344737  
 H 2.817515 5.311958 -1.355469  
 H 2.665203 5.666596 0.392781  
 H 4.103541 4.810506 -0.223980  
 C 2.875076 0.556985 -1.502018  
 C 2.872737 1.054236 1.649131  
 C 4.249428 1.706819 1.416391  
 H 4.903842 1.099158 0.786568  
 H 4.165747 2.700379 0.980117  
 H 4.749632 1.807932 2.389621  
 C 2.083224 1.932884 2.637088  
 H 1.935775 2.946862 2.257606  
 H 1.107783 1.504519 2.877286  
 H 2.647943 2.005450 3.576696  
 C 3.116077 -0.318857 2.315664  
 H 2.173673 -0.806370 2.582396  
 H 3.665653 -1.003038 1.662588  
 H 3.708474 -0.174390 3.230225  
 C 3.825434 -0.637397 -1.267804  
 H 3.284829 -1.528759 -0.942778  
 H 4.331672 -0.876872 -2.212484  
 H 4.603603 -0.417747 -0.531698  
 C 1.929680 0.183543 -2.658682  
 H 1.359140 -0.719746 -2.431334  
 H 1.228871 0.993132 -2.885986  
 H 2.523972 -0.004198 -3.563430  
 C 3.699551 1.774860 -1.960816  
 H 4.292671 1.471448 -2.835293  
 H 3.061028 2.605541 -2.270009  
 H 4.392986 2.138396 -1.202047

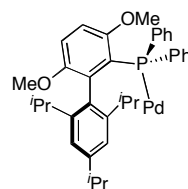

Complex 6

C -3.262610 -0.325517 1.283283  
 C -3.616406 -1.109353 0.194638  
 C -2.937721 -0.895623 -1.030564  
 C -1.925016 0.087785 -1.161184  
 C -1.508047 0.791191 0.030307  
 C -2.202735 0.608059 1.235036  
 H -3.798976 -0.462076 2.219385  
 H -3.303707 -1.389042 -1.926111  
 C -0.294430 1.684370 -0.031521  
 C 1.034840 1.187338 0.012361  
 C -0.506118 3.082271 -0.116425  
 C 2.110059 2.115808 0.008711  
 C 0.567460 3.967310 -0.164259  
 C 1.874108 3.484920 -0.096516  
 H 0.407111 5.036230 -0.241033  
 H 2.696871 4.190140 -0.109328

P 1.371694 -0.662338 -0.011555  
 C -1.836814 1.353228 2.516753  
 H -0.978962 1.997711 2.300659  
 C -4.736257 -2.135053 0.298716  
 H -5.080689 -2.127735 1.341995  
 C -4.246515 -3.562237 -0.014608  
 H -3.893199 -3.643162 -1.049490  
 H -3.418250 -3.846677 0.643863  
 H -5.057703 -4.288492 0.119207  
 C -5.942986 -1.761561 -0.585308  
 H -6.761822 -2.477886 -0.445563  
 H -6.317956 -0.761751 -0.339919  
 H -5.675652 -1.766808 -1.648878  
 C -1.547328 0.610122 -2.554992  
 H -0.572491 1.102997 -2.468948  
 C -1.418915 -0.476903 -3.634973  
 H -1.067189 -0.030984 -4.573475  
 H -0.708875 -1.255684 -3.331707  
 H -2.380695 -0.957861 -3.849518  
 C -2.570891 1.678645 -2.999764  
 H -2.269452 2.125131 -3.955790  
 H -3.562322 1.228897 -3.135817  
 H -2.660131 2.474753 -2.255760  
 C -1.409402 0.395128 3.646346  
 H -1.106399 0.963885 4.534527  
 H -2.229914 -0.268686 3.942829  
 H -0.565076 -0.230940 3.340528  
 C -2.987923 2.268205 2.980001  
 H -3.877997 1.687621 3.250833  
 H -2.688698 2.845778 3.863774  
 H -3.270478 2.968694 2.187874  
 O -1.817652 3.489013 -0.149636  
 O 3.364033 1.594647 0.145777  
 C -2.088138 4.878243 -0.225161  
 H -1.682045 5.321770 -1.144457  
 H -3.175733 4.969854 -0.232369  
 H -1.684835 5.416472 0.643213  
 C 4.488978 2.435117 -0.039289  
 H 4.567083 3.189650 0.755541  
 H 5.358152 1.776517 0.000162  
 H 4.458677 2.938422 -1.014279  
 C 2.818678 -0.836781 -1.158333  
 C 4.074175 -1.312858 -0.754422  
 C 2.609078 -0.568224 -2.520474  
 C 5.092802 -1.511684 -1.688908  
 H 4.262195 -1.521630 0.293723  
 C 3.633417 -0.747014 -3.450060  
 H 1.634706 -0.223312 -2.856946  
 C 4.879999 -1.224820 -3.038597  
 H 5.674742 -1.378692 -3.763889  
 C 2.059291 -1.056855 1.660364  
 C 2.179675 -2.418751 1.989474  
 C 2.403186 -0.102032 2.628462  
 C 2.662749 -2.814423 3.236343  
 H 1.880239 -3.170625 1.262914  
 C 2.865791 -0.499126 3.885614

H 2.308454 0.954319 2.405862  
 C 3.004887 -1.853509 4.191196  
 H 3.366985 -2.159219 5.169321  
 Pd -0.588782 -1.661387 -0.633906  
 H 3.452827 -0.525591 -4.499104  
 H 6.057969 -1.887527 -1.357529  
 H 2.755019 -3.872411 3.467853  
 H 3.120232 0.255030 4.626226

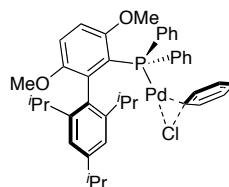

#### Transition State 6-TS

C -2.032788 0.698432 -0.034347  
 C -2.496359 0.159326 -1.259582  
 C -3.347425 -0.952074 -1.230992  
 C -3.764299 -1.546760 -0.039804  
 C -3.295026 -0.997893 1.156866  
 C -2.445034 0.111946 1.188146  
 C -1.261515 1.996047 -0.028043  
 C 0.146110 2.109963 0.007617  
 C 0.737408 3.403412 0.003316  
 C -0.053322 4.547596 -0.055315  
 C -1.443533 4.434494 -0.083106  
 C -2.044855 3.179873 -0.057628  
 H -3.703807 -1.366559 -2.171264  
 H -3.608575 -1.440142 2.099208  
 H 0.395020 5.534079 -0.063702  
 H -2.040746 5.338063 -0.117382  
 P 1.228390 0.593963 0.046337  
 Pd 0.246503 -1.462035 -0.386753  
 C 1.497278 -3.316609 -0.376545  
 C 1.739669 -3.758821 0.935645  
 C 2.543635 -3.234348 -1.311963  
 C 3.053235 -4.011505 1.331993  
 H 0.913416 -3.889556 1.625715  
 C 3.847648 -3.484398 -0.888170  
 H 2.333821 -2.955628 -2.338590  
 C 4.113500 -3.870573 0.431115  
 H 3.243178 -4.330856 2.353917  
 H 4.661815 -3.383990 -1.601586  
 Cl -0.273904 -3.779111 -1.084929  
 H 5.131678 -4.082149 0.744682  
 C -2.030426 0.677570 2.545360  
 C -1.345735 -0.376852 3.435610  
 C -3.233063 1.316311 3.269257  
 H -1.299131 1.472740 2.371523  
 H -0.484003 -0.820884 2.926775  
 H -0.993529 0.082134 4.367238  
 H -2.033789 -1.186840 3.704757  
 H -3.706467 2.080218 2.643693  
 H -3.993938 0.564724 3.511837

H -2.914592 1.784505 4.209007  
 C -2.142752 0.776437 -2.612468  
 C -3.366357 1.473329 -3.242465  
 C -1.542845 -0.251481 -3.591374  
 H -1.382579 1.546026 -2.441320  
 H -3.788288 2.218246 -2.561244  
 H -3.086799 1.973900 -4.177983  
 H -4.154483 0.746969 -3.475105  
 H -0.683089 -0.765786 -3.147059  
 H -2.275019 -1.016548 -3.873978  
 H -1.217152 0.246562 -4.513447  
 C -4.718136 -2.734051 -0.054171  
 C -6.087340 -2.363725 0.549412  
 C -4.124055 -3.971430 0.644073  
 H -4.884589 -2.999854 -1.107209  
 H -6.533615 -1.510253 0.026785  
 H -6.783238 -3.208924 0.480872  
 H -5.993186 -2.094234 1.608380  
 H -3.164539 -4.252929 0.198153  
 H -3.954689 -3.784408 1.711282  
 H -4.807838 -4.825161 0.561712  
 O 2.097300 3.448401 0.086225  
 O -3.404836 2.999466 -0.059064  
 C 2.758515 4.695193 -0.031245  
 H 3.824855 4.464245 -0.018828  
 H 2.506741 5.197017 -0.974586  
 H 2.519301 5.361189 0.808941  
 C -4.235812 4.147532 -0.064487  
 H -5.260653 3.772430 -0.047809  
 H -4.064782 4.775116 0.820652  
 H -4.086813 4.752511 -0.969193  
 C 2.539584 0.957013 -1.216771  
 C 3.897882 1.112592 -0.908501  
 C 2.147575 0.999626 -2.563989  
 C 4.838511 1.307665 -1.922132  
 H 4.225314 1.089545 0.125445  
 C 3.085128 1.213948 -3.574648  
 H 1.103063 0.858566 -2.827115  
 C 4.437106 1.364218 -3.257885  
 H 5.888573 1.420958 -1.663386  
 H 2.759124 1.251519 -4.611083  
 H 5.170555 1.518402 -4.045037  
 C 2.092595 0.680938 1.678359  
 C 2.996427 -0.350844 1.988668  
 C 1.836023 1.660038 2.649204  
 C 3.644410 -0.383386 3.223491  
 H 3.190159 -1.138048 1.266527  
 C 2.471413 1.614538 3.892145  
 H 1.136333 2.461963 2.441594  
 C 3.382343 0.597974 4.182055  
 H 4.344211 -1.186738 3.438486  
 H 2.254393 2.380168 4.632874  
 H 3.878152 0.566262 5.148730

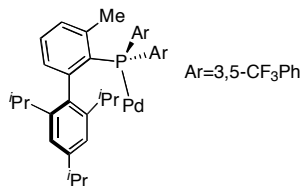

#### Complex 7

C 4.502102 0.648635 -0.566884  
 C 4.616343 -0.422925 -1.443621  
 C 3.858756 -1.584717 -1.172121  
 C 3.014985 -1.682356 -0.042142  
 C 2.842512 -0.507337 0.777051  
 C 3.608843 0.645713 0.525039  
 H 5.096149 1.539951 -0.754078  
 H 4.019108 -2.471118 -1.778530  
 C 1.871372 -0.545535 1.929938  
 C 0.458489 -0.376865 1.803319  
 C 2.428397 -0.737648 3.203115  
 C -0.346500 -0.383990 2.976502  
 C 1.634390 -0.766824 4.343890  
 C 0.262101 -0.584825 4.223591  
 H 2.084108 -0.918571 5.321370  
 H -0.361625 -0.588854 5.113774  
 P -0.246008 -0.171439 0.075739  
 C 3.467844 1.923338 1.351166  
 H 2.666206 1.768261 2.079827  
 C 5.555604 -0.359993 -2.639800  
 H 6.006670 0.641592 -2.638933  
 C 4.803168 -0.525499 -3.974540  
 H 4.338263 -1.515926 -4.050001  
 H 4.011552 0.225154 -4.077453  
 H 5.490699 -0.415745 -4.821738  
 C 6.704170 -1.381776 -2.524892  
 H 7.402652 -1.273785 -3.363316  
 H 7.264954 -1.244010 -1.593871  
 H 6.326259 -2.411180 -2.539308  
 C 2.554818 -3.062222 0.447068  
 H 1.695305 -2.908103 1.108125  
 C 2.108328 -4.019317 -0.671130  
 H 1.668942 -4.924931 -0.237347  
 H 1.354870 -3.549966 -1.316099  
 H 2.946943 -4.335520 -1.302631  
 C 3.670128 -3.713136 1.293773  
 H 3.337573 -4.680683 1.688461  
 H 4.568454 -3.883900 0.688567  
 H 3.952099 -3.081244 2.142304  
 C 3.061918 3.128798 0.478772  
 H 2.799543 3.987191 1.107400  
 H 3.875883 3.437064 -0.187561  
 H 2.194314 2.889399 -0.145138  
 C 4.750318 2.232307 2.148290  
 H 5.605408 2.393940 1.481216  
 H 4.619900 3.140308 2.749254  
 H 5.007802 1.410309 2.825688

C -1.797569 -1.186831 0.073414  
 C -3.075688 -0.688914 -0.207252  
 C -1.647646 -2.571877 0.247816  
 C -4.169076 -1.553384 -0.314611  
 C -2.743960 -3.427390 0.159861  
 H -0.665307 -2.990317 0.441160  
 C -4.015336 -2.926089 -0.128930  
 C -0.826064 1.586302 0.014368  
 C -1.363598 2.059671 -1.193864  
 C -0.627890 2.500883 1.057618  
 C -1.729337 3.397889 -1.337286  
 H -1.487367 1.380974 -2.033169  
 C -0.969095 3.846830 0.898682  
 H -0.204814 2.170271 1.999193  
 C -1.529340 4.302941 -0.293211  
 H -1.808989 5.343171 -0.408366  
 Pd 1.349444 -0.831883 -1.390661  
 C -2.272226 3.874189 -2.660852  
 C -0.673289 4.822711 2.008475  
 F 0.579674 5.326916 1.901970  
 F -0.759392 4.240819 3.223939  
 F -1.521665 5.871730 1.994291  
 F -1.277584 4.088499 -3.550991  
 F -3.103569 2.963605 -3.211102  
 F -2.954242 5.032016 -2.537178  
 H -4.865328 -3.592615 -0.209840  
 H -3.237275 0.375923 -0.331957  
 C -5.517034 -0.987474 -0.682585  
 C -2.550627 -4.898711 0.422393  
 F -5.636164 -0.824694 -2.018827  
 F -6.526445 -1.791847 -0.287566  
 F -5.716195 0.225016 -0.119619  
 F -3.512789 -5.645288 -0.157714  
 F -2.579098 -5.171742 1.747225  
 F -1.357702 -5.335326 -0.041021  
 H 3.504490 -0.856373 3.286622  
 C -1.848327 -0.181833 2.985977  
 H -2.179254 0.587133 2.284788  
 H -2.382342 -1.103919 2.731428  
 H -2.175503 0.120580 3.985447

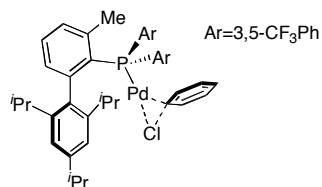

#### Transition State 7-TS

C 2.965165 -0.319521 1.086216  
 C 3.338276 -1.659505 0.805058  
 C 4.327404 -1.897430 -0.157415  
 C 4.968090 -0.865794 -0.846463  
 C 4.586306 0.446659 -0.552002  
 C 3.604968 0.745208 0.398922  
 C 2.087841 -0.025697 2.282478

C 0.681428 0.188687 2.271453  
 C 0.002187 0.457482 3.493420  
 C 0.735955 0.506355 4.684796  
 C 2.111003 0.298574 4.698507  
 C 2.775379 0.037702 3.506485  
 H 4.613155 -2.923857 -0.374448  
 H 5.072267 1.268102 -1.071955  
 H 0.212594 0.715441 5.614115  
 H 2.662405 0.344366 5.633734  
 P -0.177700 0.104073 0.626305  
 Pd 1.030814 -0.700221 -1.164809  
 C -0.215784 -1.390627 -2.873833  
 C -0.913793 -0.349002 -3.506726  
 C -0.856460 -2.599715 -2.559664  
 C -2.288881 -0.483910 -3.707354  
 H -0.395610 0.554319 -3.809354  
 C -2.232241 -2.708955 -2.768292  
 H -0.293691 -3.427730 -2.142945  
 C -2.956823 -1.655335 -3.332963  
 H -2.835932 0.341522 -4.155541  
 H -2.732319 -3.629901 -2.480010  
 Cl 1.722598 -1.550683 -3.367461  
 H -4.026095 -1.750963 -3.496074  
 C 3.289002 2.209884 0.698323  
 C 2.900825 3.002281 -0.564690  
 C 4.455028 2.894633 1.439336  
 H 2.427469 2.235642 1.372203  
 H 2.100209 2.497384 -1.116727  
 H 2.551294 4.003131 -0.287174  
 H 3.751667 3.122169 -1.245017  
 H 4.688659 2.378680 2.377342  
 H 5.364256 2.902187 0.826683  
 H 4.200216 3.934369 1.677038  
 C 2.727200 -2.847689 1.548764  
 C 3.732426 -3.464023 2.542626  
 C 2.181158 -3.926770 0.593013  
 H 1.880767 -2.476110 2.136061  
 H 4.069371 -2.727118 3.279653  
 H 3.274810 -4.300686 3.084201  
 H 4.617879 -3.845341 2.020331  
 H 1.524428 -3.482989 -0.163975  
 H 2.986501 -4.449154 0.063931  
 H 1.609486 -4.677712 1.151144  
 C 6.055979 -1.168856 -1.867870  
 C 7.428286 -0.639532 -1.406989  
 C 5.701562 -0.636126 -3.269134  
 H 6.132393 -2.262291 -1.941176  
 H 7.704180 -1.048208 -0.428482  
 H 8.209440 -0.915641 -2.125319  
 H 7.424061 0.453956 -1.323811  
 H 4.736919 -1.027486 -3.608710  
 H 5.637703 0.458560 -3.275157  
 H 6.468956 -0.927805 -3.996218  
 C -1.693671 -0.932822 0.877763  
 C -3.009169 -0.457251 0.811413  
 C -1.488772 -2.312225 1.018944

C -4.088228 -1.340123 0.892224  
 H -3.207552 0.602622 0.703516  
 C -2.569055 -3.189503 1.107213  
 H -0.479924 -2.709721 1.042806  
 C -3.877457 -2.710723 1.042384  
 H -4.716872 -3.393070 1.110227  
 C -0.810632 1.811766 0.311067  
 C -1.553240 2.025922 -0.861308  
 C -0.444639 2.923711 1.079926  
 C -1.925217 3.314122 -1.244400  
 H -1.820335 1.185262 -1.493962  
 C -0.801841 4.213969 0.677966  
 H 0.127814 2.793400 1.991887  
 C -1.546342 4.420378 -0.482332  
 H -1.822476 5.421386 -0.789295  
 C -2.708895 3.478599 -2.521485  
 C -0.306436 5.384745 1.486082  
 C -5.496286 -0.819457 0.756394  
 C -2.307647 -4.671792 1.156024  
 F -3.332364 -5.349611 1.711803  
 F -2.126968 -5.174909 -0.089821  
 F -1.191725 -4.963253 1.860539  
 F -6.361394 -1.521690 1.519817  
 F -5.590253 0.477990 1.118694  
 F -5.933361 -0.909590 -0.519392  
 F -3.864991 2.779918 -2.485061  
 F -2.011402 3.013800 -3.586931  
 F -3.016385 4.766200 -2.771320  
 F -0.987989 6.516106 1.216985  
 F 1.001428 5.635816 1.233172  
 F -0.406269 5.149581 2.812718  
 C -1.489989 0.689265 3.599675  
 H -1.870181 1.364671 2.829380  
 H -2.049924 -0.248233 3.514054  
 H -1.732547 1.128894 4.571670  
 H 3.849641 -0.119901 3.506700

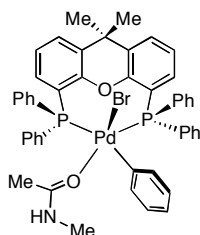

**Complex 8**

Pd 0.332869 -0.984930 -0.308090  
 P -2.065438 -0.019770 0.300275  
 P 1.786225 0.691717 0.423009  
 O -0.387742 2.284282 -0.533371  
 C 1.929693 -1.740083 -1.307510  
 C 2.455494 -2.978002 -0.918796  
 H 2.135095 -3.430673 0.016410  
 C 3.385233 -3.628017 -1.737773  
 H 3.791039 -4.588516 -1.426508

C 3.798419 -3.051035 -2.942521  
 H 4.528845 -3.555858 -3.570311  
 C 3.271469 -1.817763 -3.328441  
 H 3.582816 -1.358075 -4.264371  
 C 2.338340 -1.162075 -2.513535  
 H 1.935748 -0.205470 -2.833623  
 C -1.606435 2.354144 -1.170067  
 C -2.563742 1.398454 -0.798523  
 C -3.842875 1.533452 -1.361294  
 H -4.624375 0.833568 -1.088672  
 C -4.112285 2.533928 -2.293827  
 H -5.106693 2.617503 -2.723018  
 C -3.108131 3.417565 -2.692050  
 H -3.333476 4.171774 -3.438586  
 C -1.829695 3.349843 -2.130127  
 C -0.687522 4.325553 -2.448568  
 C 0.636628 3.564959 -2.292012  
 C 1.793960 3.793503 -3.046100  
 H 1.778391 4.510738 -3.859708  
 C 2.976926 3.106504 -2.768438  
 H 3.859442 3.286920 -3.375377  
 C 3.040993 2.195159 -1.712634  
 H 3.965316 1.665163 -1.514652  
 C 1.909455 1.945146 -0.924121  
 C 0.726980 2.616592 -1.269841  
 C -0.832483 4.936624 -3.853376  
 H -1.763748 5.504650 -3.937469  
 H -0.824902 4.167587 -4.633064  
 H -0.020571 5.642142 -4.054708  
 C -0.714953 5.473661 -1.398479  
 H -1.660220 6.024677 -1.463500  
 H 0.109705 6.173390 -1.577123  
 H -0.618519 5.082421 -0.380931  
 C -3.409403 -1.242138 -0.093630  
 C -3.601809 -1.640151 -1.429277  
 H -2.985627 -1.215948 -2.214408  
 C -4.576497 -2.580316 -1.760036  
 H -4.714651 -2.866838 -2.799588  
 C -5.366630 -3.157450 -0.761528  
 H -6.123340 -3.893901 -1.019132  
 C -5.175619 -2.780034 0.567081  
 H -5.782313 -3.220645 1.353774  
 C -4.208368 -1.826470 0.898962  
 H -4.081989 -1.542106 1.937363  
 C -2.523994 0.544339 1.995746  
 C -3.265602 1.710221 2.238009  
 H -3.559981 2.352148 1.413619  
 C -3.636105 2.051898 3.539736  
 H -4.206719 2.960457 3.714893  
 C -3.284884 1.226257 4.609586  
 H -3.583165 1.489442 5.621323  
 C -2.544286 0.066335 4.374811  
 H -2.257008 -0.578374 5.201301  
 C -2.149975 -0.270106 3.078212  
 H -1.542436 -1.159134 2.911363  
 C 3.515748 0.276232 0.915871

C 3.797111 -1.011595 1.391392  
 H 3.015404 -1.763070 1.418531  
 C 5.068119 -1.313612 1.886298  
 H 5.268812 -2.315138 2.256439  
 C 6.065989 -0.340013 1.913924  
 H 7.055508 -0.580862 2.293847  
 C 5.781797 0.955001 1.473682  
 H 6.544725 1.728022 1.516396  
 C 4.511087 1.266684 0.991929  
 H 4.296470 2.287844 0.693248  
 C 1.298974 1.656746 1.923376  
 C 1.358748 3.057505 1.972639  
 H 1.603009 3.629894 1.083325  
 C 1.116918 3.729330 3.171288  
 H 1.164280 4.815141 3.197571  
 C 0.822176 3.010197 4.331151  
 H 0.637549 3.534575 5.265194  
 C 0.768024 1.616788 4.285888  
 H 0.536440 1.049273 5.182556  
 C 1.001967 0.936581 3.089612  
 H 0.953486 -0.150725 3.064441  
 Br 0.530566 -2.814360 2.337647  
 O -0.758816 -2.471352 -1.632760  
 C -0.874849 -3.714418 -1.589574  
 C -1.375999 -4.446051 -0.374236  
 H -2.398864 -4.119949 -0.161734  
 H -1.366507 -5.533606 -0.500026  
 N -0.585214 -4.466456 -2.675160  
 H -0.678091 -5.467824 -2.583421  
 C -0.010348 -3.939535 -3.903381  
 H 1.050478 -4.200905 -3.984593  
 H -0.552411 -4.330619 -4.771018  
 H -0.096572 -2.854027 -3.875104  
 H -0.761577 -4.165137 0.492472

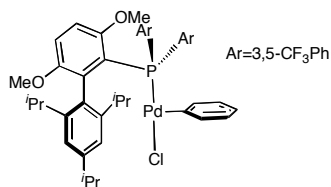

#### Complex 9a

C -4.369368 -1.458259 -0.764320  
 C -5.068023 -0.279961 -1.037085  
 C -4.601523 0.903222 -0.459584  
 C -3.486871 0.937819 0.380845  
 C -2.801607 -0.280201 0.671913  
 C -3.260581 -1.495294 0.082345  
 H -4.707545 -2.382248 -1.226863  
 H -5.114837 1.834294 -0.677184  
 C -1.896405 -0.352314 1.882765  
 C -0.491277 -0.249552 1.873386  
 C -2.547891 -0.566901 3.126497  
 C 0.242517 -0.344649 3.085050  
 C -1.813559 -0.653591 4.307435

C -0.422818 -0.542521 4.290703  
 H -2.310644 -0.815288 5.256450  
 H 0.124766 -0.623257 5.222039  
 P 0.367064 0.016937 0.267504  
 C -2.610416 -2.841985 0.392893  
 H -1.772770 -2.658633 1.073472  
 C -6.320306 -0.316458 -1.901853  
 H -6.297601 -1.266553 -2.452208  
 C -6.381208 0.815553 -2.941563  
 H -6.510320 1.795412 -2.465755  
 H -5.466286 0.846938 -3.539786  
 H -7.237212 0.664674 -3.609998  
 C -7.584467 -0.323530 -1.016616  
 H -8.487302 -0.407730 -1.633505  
 H -7.573981 -1.161141 -0.309841  
 H -7.659263 0.604111 -0.435750  
 C -3.076965 2.270424 1.008025  
 H -2.099051 2.130673 1.482786  
 C -2.926252 3.391092 -0.040466  
 H -2.451924 4.270713 0.409173  
 H -2.323229 3.064500 -0.894966  
 H -3.897821 3.706544 -0.437061  
 C -4.062855 2.701179 2.113528  
 H -3.726331 3.632346 2.585118  
 H -5.061067 2.878029 1.695746  
 H -4.156764 1.933772 2.887378  
 C -2.030738 -3.517268 -0.865094  
 H -1.465674 -4.414654 -0.586470  
 H -2.820735 -3.815642 -1.563513  
 H -1.359089 -2.837506 -1.400821  
 C -3.585869 -3.784748 1.125501  
 H -4.434033 -4.053551 0.485241  
 H -3.077434 -4.713086 1.412189  
 H -3.985999 -3.314097 2.029582  
 O -3.908374 -0.684962 3.077622  
 O 1.598640 -0.248782 2.981969  
 C -4.616748 -0.909213 4.287438  
 H -4.480212 -0.080720 4.994949  
 H -5.668668 -0.972398 4.005272  
 H -4.311401 -1.849371 4.765274  
 C 2.381695 -0.211747 4.169723  
 H 2.354198 -1.174644 4.694599  
 H 3.400467 0.003358 3.845223  
 H 2.042028 0.583873 4.844027  
 C 1.420904 1.515510 0.521472  
 C 2.747923 1.474316 0.965378  
 C 0.833957 2.758243 0.266452  
 C 3.459876 2.656246 1.170097  
 C 1.551155 3.939841 0.470987  
 H -0.183757 2.807448 -0.106648  
 C 2.866301 3.897088 0.926892  
 C 1.546990 -1.388430 0.095571  
 C 2.605104 -1.312353 -0.824836  
 C 1.321501 -2.593579 0.766861  
 C 3.422277 -2.420867 -1.047589  
 H 2.798417 -0.396365 -1.370273

C 2.132137 -3.704888 0.523413  
 H 0.517422 -2.674828 1.489384  
 C 3.188088 -3.625292 -0.380727  
 H 3.825600 -4.483509 -0.557667  
 Pd -1.144668 0.185232 -1.474387  
 C 0.364448 0.392474 -2.790887  
 C 0.953770 1.635202 -3.032638  
 C 0.803321 -0.738853 -3.485042  
 C 2.009905 1.735493 -3.947617  
 H 0.601825 2.529382 -2.528085  
 C 1.859302 -0.630187 -4.396631  
 H 0.324926 -1.700869 -3.329756  
 C 2.469630 0.604983 -4.624564  
 H 2.466804 2.705473 -4.129677  
 H 2.204355 -1.516417 -4.922510  
 H 3.291273 0.686860 -5.330977  
 Cl -2.585011 0.368958 -3.340259  
 C 4.530074 -2.352242 -2.069019  
 C 1.809070 -5.000236 1.220751  
 F 0.725868 -5.598503 0.670426  
 F 1.519034 -4.799606 2.526456  
 F 2.827060 -5.881112 1.158165  
 F 4.131395 -2.852437 -3.260181  
 F 4.945002 -1.088623 -2.281156  
 F 5.602206 -3.078303 -1.679625  
 H 3.421449 4.813322 1.087668  
 H 3.225235 0.524209 1.166538  
 C 4.895349 2.579185 1.622424  
 C 0.864143 5.251116 0.189532  
 F 5.738367 2.397629 0.585358  
 F 5.281369 3.701705 2.262557  
 F 5.091253 1.538778 2.471936  
 F 1.710715 6.296992 0.261034  
 F -0.137337 5.480607 1.072577  
 F 0.306387 5.253578 -1.040476

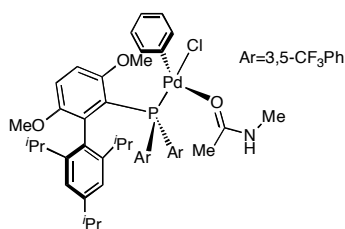

**Complex 9b**

C 3.488615 -2.789765 0.122996  
 C 4.567131 -1.940131 0.383603  
 C 4.539791 -0.667597 -0.189468  
 C 3.492741 -0.242935 -1.017253  
 C 2.410843 -1.125138 -1.266065  
 C 2.416646 -2.423347 -0.697527  
 H 3.498855 -3.784797 0.559643  
 H 5.367381 0.012398 -0.011327

C 1.363455 -0.724263 -2.277448  
 C 0.139836 -0.073928 -2.004235  
 C 1.700145 -0.967971 -3.638554  
 C -0.673935 0.367282 -3.088035  
 C 0.869223 -0.561869 -4.679327  
 C -0.315897 0.118938 -4.407258  
 H 1.139816 -0.749893 -5.711328  
 H -0.942711 0.455763 -5.224425  
 P -0.687384 0.286833 -0.374765  
 C 1.332431 -3.455202 -1.012560  
 H 0.419704 -2.917191 -1.288169  
 C 5.758626 -2.452173 1.185874  
 H 5.398068 -3.296510 1.790027  
 C 6.360788 -1.418356 2.151153  
 H 6.806020 -0.572960 1.613286  
 H 5.609926 -1.021190 2.838839  
 H 7.158465 -1.879749 2.745122  
 C 6.843247 -3.000303 0.234096  
 H 7.678126 -3.428947 0.802023  
 H 6.439592 -3.778283 -0.423112  
 H 7.241600 -2.199801 -0.401144  
 C 3.614578 1.130096 -1.686235  
 H 2.663180 1.353686 -2.178840  
 C 3.900249 2.280492 -0.701698  
 H 3.873681 3.239097 -1.230195  
 H 3.163599 2.333532 0.105497  
 H 4.887787 2.182493 -0.237301  
 C 4.700380 1.108429 -2.783581  
 H 4.731105 2.068857 -3.312551  
 H 5.691319 0.934701 -2.347056  
 H 4.511113 0.313660 -3.509662  
 C 0.979897 -4.374453 0.170501  
 H 0.088298 -4.958937 -0.076907  
 H 1.786784 -5.084791 0.388327  
 H 0.771052 -3.817109 1.086757  
 C 1.734601 -4.327602 -2.222112  
 H 2.619777 -4.930163 -1.981793  
 H 0.916990 -5.010943 -2.480052  
 H 1.973739 -3.721385 -3.098341  
 O 2.894992 -1.604207 -3.850425  
 O -1.789654 1.055441 -2.727030  
 C 3.279415 -1.902230 -5.182935  
 H 3.405083 -0.990527 -5.782143  
 H 4.238657 -2.416579 -5.104874  
 H 2.553227 -2.562710 -5.675109  
 C -2.704843 1.526070 -3.708194  
 H -3.113887 0.695843 -4.297185  
 H -3.501729 2.007357 -3.140795  
 H -2.224924 2.252883 -4.375605  
 C 0.213824 -0.365280 1.107982  
 C 1.353453 0.256647 1.638493  
 C -0.410660 -1.367451 1.855440  
 C 1.851272 -0.124552 2.883422



H 1.845040 1.051758 1.095378  
 C 0.090303 -1.746402 3.103960  
 H -1.306373 -1.834854 1.470976  
 C 1.222257 -1.127196 3.625330  
 H 1.602810 -1.406153 4.601110  
 C -0.412392 2.105695 -0.139084  
 C -0.821127 2.692885 1.068110  
 C 0.161868 2.912824 -1.122232  
 C -0.639747 4.056589 1.284457  
 H -1.300478 2.096970 1.833861  
 C 0.325909 4.285259 -0.906023  
 H 0.476410 2.489881 -2.067790  
 C -0.071537 4.863013 0.296432  
 H 0.043309 5.929002 0.458717  
 Pd -2.932358 -0.342273 -0.307901  
 C -2.556471 -2.266045 -0.847220  
 C -2.309093 -2.593452 -2.186769  
 C -2.823527 -3.311766 0.050962  
 C -2.334692 -3.924939 -2.620056  
 H -2.101777 -1.813214 -2.912548  
 C -2.846601 -4.643132 -0.378807  
 H -3.034312 -3.104338 1.097742  
 C -2.603502 -4.955660 -1.717997  
 H -2.146926 -4.151851 -3.667423  
 H -3.059344 -5.434302 0.337008  
 H -2.625895 -5.989267 -2.053933  
 O -5.024654 -0.982691 -0.300912  
 C -5.839217 -0.895333 0.639820  
 N -7.151504 -1.070929 0.389628  
 H -7.801892 -0.996584 1.156917  
 C -5.435883 -0.602373 2.062527  
 H -4.679492 -1.326977 2.380034  
 H -4.977206 0.392081 2.080023  
 H -6.278520 -0.636575 2.759948  
 C -7.662947 -1.305922 -0.954353  
 H -7.279581 -2.249577 -1.354800  
 H -8.753092 -1.348392 -0.910106  
 H -7.356870 -0.497373 -1.624694  
 C 0.982894 5.136176 -1.959291  
 C -1.029725 4.680667 2.599341  
 C -0.596285 -2.844911 3.872213  
 C 3.013718 0.618174 3.489799  
 F -1.935056 -2.834797 3.666098  
 F -0.153399 -4.068608 3.503476  
 F -0.389258 -2.733674 5.200750  
 F 2.594916 1.646696 4.258948  
 F 3.835015 1.131818 2.551286  
 F 3.755850 -0.188308 4.286299  
 F -1.632189 5.876436 2.419530  
 F -1.865052 3.899476 3.309635  
 F 0.060184 4.907739 3.372339  
 F 0.492337 6.393376 -1.966422  
 F 2.320632 5.242824 -1.757415  
 F 0.816870 4.624170 -3.199028  
 Cl -3.784068 1.912499 0.232931

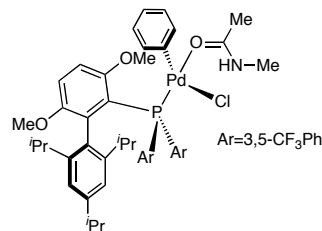

Complex 9c

C -4.516625 0.492561 0.212962  
 C -4.911257 -0.819581 0.487807  
 C -4.191323 -1.851762 -0.117066  
 C -3.119675 -1.605874 -0.984565  
 C -2.735241 -0.265602 -1.239558  
 C -3.456711 0.800196 -0.646696  
 H -5.073481 1.305333 0.671004  
 H -4.483885 -2.881614 0.066716  
 C -1.672345 0.004358 -2.275968  
 C -0.291589 0.177925 -2.029976  
 C -2.121596 0.021297 -3.625156  
 C 0.599061 0.308036 -3.134878  
 C -1.236349 0.199044 -4.685059  
 C 0.128663 0.332171 -4.442166  
 H -1.590740 0.215659 -5.708560  
 H 0.813680 0.440320 -5.274674  
 P 0.618189 0.353854 -0.414411  
 C -3.160433 2.264910 -0.974173  
 H -2.109504 2.342220 -1.272666  
 C -6.148821 -1.078001 1.340654  
 H -6.338483 -0.159803 1.913930  
 C -5.988059 -2.226108 2.350321  
 H -5.849687 -3.191438 1.849168  
 H -5.132928 -2.067160 3.012007  
 H -6.888254 -2.309243 2.970691  
 C -7.378079 -1.316127 0.438184  
 H -8.286182 -1.436407 1.041599  
 H -7.533043 -0.478898 -0.251190  
 H -7.249183 -2.224429 -0.162991  
 C -2.473609 -2.802540 -1.691183  
 H -1.613072 -2.437726 -2.261152  
 C -1.954362 -3.887100 -0.727427  
 H -1.463514 -4.687385 -1.292104  
 H -1.218468 -3.493931 -0.019160  
 H -2.765256 -4.336324 -0.143730  
 C -3.454407 -3.430873 -2.704213  
 H -2.962482 -4.231946 -3.269579  
 H -4.320794 -3.866431 -2.192289  
 H -3.823525 -2.680553 -3.408531  
 C -3.373182 3.227147 0.208021  
 H -2.966737 4.210787 -0.046961  
 H -4.437857 3.360745 0.435681  
 H -2.878322 2.887228 1.120483  
 C -4.012915 2.747611 -2.168596  
 H -5.078589 2.733286 -1.907484  
 H -3.740691 3.776568 -2.431492

H -3.878807 2.115077 -3.048497  
 O -3.466790 -0.160584 -3.805929  
 O 1.923915 0.372048 -2.820454  
 C -3.987138 -0.119342 -5.125461  
 H -3.568214 -0.918283 -5.751658  
 H -5.063095 -0.268940 -5.022536  
 H -3.800447 0.851641 -5.602966  
 C 2.870799 0.766617 -3.808406  
 H 2.578712 1.711946 -4.279501  
 H 3.808246 0.906122 -3.270145  
 H 2.988362 -0.011476 -4.573258  
 C -0.469062 0.342938 1.087324  
 C -1.011997 -0.832602 1.625347  
 C -0.534488 1.519447 1.842761  
 C -1.598769 -0.827795 2.889616  
 H -0.964744 -1.761044 1.073175  
 C -1.131056 1.520715 3.107676  
 H -0.098956 2.431315 1.453059  
 C -1.661160 0.348587 3.639571  
 H -2.102370 0.344534 4.629256  
 C 1.457501 -1.287826 -0.203943  
 C 2.179435 -1.504050 0.976198  
 C 1.457053 -2.287547 -1.180966  
 C 2.890058 -2.687444 1.171829  
 H 2.207780 -0.736525 1.741252  
 C 2.163055 -3.477083 -0.978283  
 H 0.916697 -2.146685 -2.109026  
 C 2.886463 -3.684230 0.195663  
 H 3.448588 -4.598940 0.341794  
 Pd 2.234120 2.108000 -0.364293  
 C 0.895054 3.540515 -0.791172  
 C 0.369515 3.679032 -2.080023  
 C 0.589322 4.510376 0.174080  
 C -0.456582 4.764565 -2.398107  
 H 0.606367 2.954708 -2.852640  
 C -0.242579 5.588751 -0.143760  
 H 1.021248 4.451999 1.168887  
 C -0.767971 5.721498 -1.431157  
 H -0.848753 4.860678 -3.408307  
 H -0.463425 6.334715 0.616210  
 H -1.402755 6.568005 -1.680460  
 O 3.941255 0.647518 0.028430  
 C 4.877298 0.770066 0.842733  
 N 6.058931 0.167511 0.600998  
 H 6.789481 0.248051 1.292008  
 C 4.762192 1.570671 2.115909  
 H 4.603942 2.617641 1.837467  
 H 3.884883 1.232382 2.675332  
 H 5.645900 1.485434 2.755425  
 C 6.315499 -0.597245 -0.610480  
 H 6.014746 -0.017274 -1.486693  
 H 7.384345 -0.812796 -0.669172  
 H 5.758189 -1.540592 -0.610372  
 Cl 3.896390 3.833395 -0.434964  
 C -1.199965 2.808183 3.888909  
 C -2.067397 -2.123940 3.497662

C 3.650863 -2.874477 2.457888  
 C 2.099786 -4.567583 -2.015876  
 F 3.226206 -5.312290 -2.027380  
 F 1.924920 -4.070152 -3.258861  
 F 1.070533 -5.417116 -1.783317  
 F 4.593119 -3.834668 2.354239  
 F 2.836916 -3.217140 3.478024  
 F 4.278503 -1.729706 2.828121  
 F -1.065288 -2.749463 4.155332  
 F -2.525330 -2.985899 2.565917  
 F -3.060822 -1.924755 4.395369  
 F -1.348037 2.583423 5.212130  
 F -0.082375 3.548343 3.722340  
 F -2.243537 3.574598 3.498807

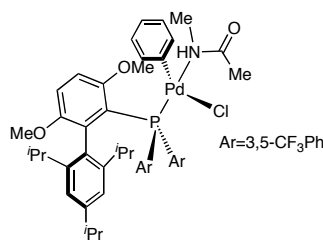

#### Complex 9d

C -3.173641 -3.081020 0.305299  
 C -4.347090 -2.323962 0.296529  
 C -4.312733 -1.070367 0.911402  
 C -3.163864 -0.577744 1.540863  
 C -1.983762 -1.365824 1.532884  
 C -1.993871 -2.641577 0.917378  
 H -3.188901 -4.060985 -0.163250  
 H -5.214814 -0.464997 0.928721  
 C -0.794194 -0.904753 2.340824  
 C 0.298778 -0.144717 1.867247  
 C -0.836845 -1.220757 3.727304  
 C 1.281129 0.318944 2.790989  
 C 0.153021 -0.785560 4.604495  
 C 1.209569 -0.005482 4.140587  
 H 0.106438 -1.029629 5.658971  
 H 1.961525 0.348888 4.835233  
 P 0.730462 0.356489 0.127330  
 C -0.787708 -3.582240 0.968425  
 H 0.116859 -2.972646 1.067967  
 C -5.629855 -2.897537 -0.294336  
 H -5.353787 -3.818659 -0.826044  
 C -6.307097 -1.963588 -1.311870  
 H -6.615696 -1.018629 -0.849984  
 H -5.642010 -1.722455 -2.145259  
 H -7.206606 -2.438587 -1.721512  
 C -6.615253 -3.293390 0.824630  
 H -7.507518 -3.772412 0.403509  
 H -6.153263 -3.991457 1.531426  
 H -6.942853 -2.412975 1.390649  
 C -3.265881 0.755885 2.287993

H -2.259896 1.044743 2.607990  
 C -3.820343 1.910485 1.431666  
 H -3.784555 2.845549 2.000121  
 H -3.243148 2.064806 0.515193  
 H -4.861260 1.736782 1.137414  
 C -4.121800 0.601983 3.563871  
 H -4.122732 1.535059 4.140417  
 H -5.161823 0.365048 3.309211  
 H -3.741659 -0.202583 4.198560  
 C -0.617128 -4.448791 -0.292381  
 H 0.349939 -4.960087 -0.254496  
 H -1.391276 -5.222427 -0.361765  
 H -0.650890 -3.862075 -1.213402  
 C -0.857419 -4.507019 2.203815  
 H -1.721966 -5.178662 2.129852  
 H 0.047837 -5.122795 2.264115  
 H -0.956988 -3.940611 3.131864  
 O -1.916211 -1.958299 4.135965  
 O 2.254576 1.106174 2.260908  
 C -2.010276 -2.326470 5.503091  
 H -2.082272 -1.446405 6.155849  
 H -2.926454 -2.913128 5.587680  
 H -1.156006 -2.941490 5.815693  
 C 3.328245 1.577810 3.073686  
 H 3.887715 0.743291 3.509741  
 H 3.978195 2.129029 2.395634  
 H 2.953855 2.239552 3.864316  
 C -0.396327 -0.320225 -1.175823  
 C -1.651708 0.238471 -1.451620  
 C 0.128574 -1.261229 -2.066705  
 C -2.358568 -0.139414 -2.592731  
 H -2.072596 0.986809 -0.794446  
 C -0.583099 -1.639681 -3.207663  
 H 1.107611 -1.679715 -1.881242  
 C -1.828244 -1.078398 -3.479083  
 H -2.371290 -1.352753 -4.375746  
 C 0.275567 2.152233 0.056541  
 C 0.338642 2.814897 -1.179798  
 C -0.107744 2.870453 1.189776  
 C 0.007716 4.163996 -1.270921  
 H 0.663618 2.290631 -2.069215  
 C -0.425170 4.229776 1.093782  
 H -0.154926 2.388469 2.157756  
 C -0.370875 4.882022 -0.134051  
 H -0.605017 5.938291 -0.206523  
 Pd 2.983444 -0.025277 -0.392452  
 C 2.919145 -1.983283 0.145164  
 C 3.016926 -2.372968 1.488365  
 C 3.025124 -2.979120 -0.841635  
 C 3.222908 -3.712990 1.837848  
 H 2.948433 -1.630896 2.277212  
 C 3.232059 -4.320634 -0.493874  
 H 2.960411 -2.726322 -1.898039  
 C 3.331534 -4.692682 0.848419  
 H 3.303884 -3.986993 2.887353  
 H 3.312994 -5.071095 -1.277101

H 3.494542 -5.732504 1.119334  
 N 5.265388 -0.175634 -0.704965  
 H 5.279808 0.850316 -0.680728  
 C 5.908665 -0.692919 0.459820  
 O 5.961312 -0.013427 1.465991  
 C 6.478599 -2.089520 0.367429  
 H 6.858668 -2.369525 1.350438  
 H 5.714851 -2.805742 0.048945  
 H 7.298740 -2.127073 -0.359528  
 C 5.610088 -0.687643 -2.045106  
 H 5.291527 -1.726752 -2.144266  
 H 5.071666 -0.079085 -2.773791  
 H 6.686345 -0.615959 -2.245189  
 C 0.003299 -2.668443 -4.139003  
 C -3.654035 0.555389 -2.925874  
 C 0.028378 4.872014 -2.601673  
 C -0.880902 4.969961 2.322891  
 F -2.220108 4.856234 2.508192  
 F -0.294032 4.491337 3.442472  
 F -0.609153 6.288654 2.248245  
 F -1.230383 5.092902 -3.052243  
 F 0.622633 6.080947 -2.506555  
 F 0.673832 4.165816 -3.547631  
 F -3.434544 1.715930 -3.580489  
 F -4.437368 -0.206285 -3.724447  
 F -4.365403 0.854316 -1.818650  
 F -0.467512 -2.533059 -5.395325  
 F 1.352527 -2.576892 -4.194830  
 F -0.286537 -3.929230 -3.741411  
 Cl 3.476088 2.255756 -1.210242

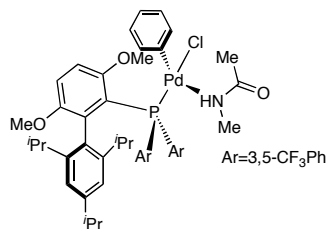

Complex **9e**

C 4.481848 -0.801282 -0.054070  
 C 4.986897 0.486077 0.142272  
 C 4.271139 1.553612 -0.405573  
 C 3.104064 1.362731 -1.153807  
 C 2.619109 0.042907 -1.347270  
 C 3.322642 -1.055503 -0.796395  
 H 5.030220 -1.639665 0.366643  
 H 4.644396 2.565189 -0.272741  
 C 1.476048 -0.170620 -2.309208  
 C 0.098634 -0.206143 -1.991207  
 C 1.850167 -0.254292 -3.678981  
 C -0.857917 -0.255733 -3.046204  
 C 0.897015 -0.347967 -4.688971  
 C -0.459081 -0.335264 -4.375725

H 1.193488 -0.410375 -5.729008  
H -1.191807 -0.385475 -5.171472  
P -0.727997 -0.274753 -0.324263  
C 2.900868 -2.505142 -1.046627  
H 1.830354 -2.515103 -1.279808  
C 6.320422 0.686486 0.853267  
H 6.566802 -0.264521 1.345458  
C 6.286396 1.772989 1.941299  
H 6.079098 2.763074 1.518471  
H 5.522546 1.566136 2.695046  
H 7.257657 1.831248 2.446839  
C 7.437423 0.975552 -0.171069  
H 8.410833 1.054679 0.328134  
H 7.501137 0.181623 -0.923232  
H 7.250902 1.919853 -0.696983  
C 2.449295 2.585244 -1.806263  
H 1.477404 2.275809 -2.203436  
C 2.190409 3.752113 -0.832772  
H 1.600951 4.528803 -1.332227  
H 1.636927 3.440586 0.058499  
H 3.124276 4.211900 -0.490859  
C 3.290237 3.088016 -2.999349  
H 2.781138 3.916044 -3.507784  
H 4.266567 3.453326 -2.658868  
H 3.468235 2.288674 -3.723024  
C 3.116701 -3.431729 0.163734  
H 2.641854 -4.398394 -0.029725  
H 4.181560 -3.620341 0.345968  
H 2.688283 -3.027409 1.083801  
C 3.640006 -3.097100 -2.266854  
H 4.717486 -3.159660 -2.069156  
H 3.271629 -4.108767 -2.473042  
H 3.501216 -2.485816 -3.160658  
O 3.195136 -0.212387 -3.933232  
O -2.164302 -0.197470 -2.665160  
C 3.637715 -0.334773 -5.276161  
H 3.273258 0.491949 -5.900330  
H 4.727323 -0.298517 -5.231267  
H 3.324395 -1.289516 -5.718504  
C -3.188447 -0.196266 -3.660648  
H -3.188494 -1.138318 -4.221929  
H -4.119787 -0.079417 -3.110217  
H -3.056701 0.646759 -4.350054  
C 0.446646 -0.376622 1.108232  
C 1.171616 0.726069 1.583936  
C 0.411535 -1.539761 1.884631  
C 1.833457 0.662679 2.808936  
H 1.205801 1.644172 1.014315  
C 1.091261 -1.605341 3.104691  
H -0.166993 -2.389487 1.548191  
C 1.799493 -0.504136 3.576284  
H 2.305137 -0.544570 4.534032  
C -1.358136 1.459463 -0.075307  
C -1.820590 1.831082 1.194889  
C -1.455018 2.393032 -1.114335  
C -2.390582 3.088259 1.412742

H -1.736528 1.143035 2.031791  
C -1.999636 3.657272 -0.885326  
H -1.106647 2.144028 -2.108250  
C -2.482469 4.012103 0.374756  
H -2.925727 4.985964 0.542301  
Pd -2.461975 -1.930994 -0.055267  
C -1.250944 -3.400505 -0.723768  
C -0.994190 -3.514087 -2.092681  
C -0.792529 -4.399883 0.144108  
C -0.265264 -4.602530 -2.588111  
H -1.369092 -2.771058 -2.787003  
C -0.060671 -5.482604 -0.354311  
H -1.031937 -4.369575 1.202539  
C 0.207972 -5.587595 -1.720873  
H -0.078018 -4.677865 -3.656901  
H 0.280935 -6.254554 0.331272  
H 0.766399 -6.436649 -2.106496  
N -4.163447 -0.384983 0.779497  
H -3.614938 0.471465 0.788946  
C -5.150889 -0.223406 -0.231747  
O -4.954011 0.590798 -1.119023  
C -6.379562 -1.092028 -0.151751  
H -6.993441 -0.902106 -1.033303  
H -6.089916 -2.147804 -0.102109  
H -6.961542 -0.860227 0.748411  
C -4.560364 -0.805574 2.139574  
H -4.948820 -1.823061 2.103247  
H -3.667006 -0.811380 2.767999  
H -5.298975 -0.122859 2.577519  
Cl -4.046452 -3.682080 0.327773  
C 1.063246 -2.886264 3.899496  
C 2.494197 1.895178 3.370344  
C -2.928025 3.394592 2.786756  
C -2.012215 4.666795 -2.005563  
F -2.992152 5.578698 -1.849047  
F -0.841981 5.348051 -2.062150  
F -2.181462 4.077905 -3.207613  
F -1.971017 3.271581 3.729684  
F -3.437438 4.636782 2.873379  
F -3.914542 2.523416 3.118402  
F -0.119241 -3.525270 3.768220  
F 2.025108 -3.744865 3.492431  
F 1.264407 -2.661180 5.215112  
F 2.954131 2.713620 2.401971  
F 1.628967 2.615075 4.119418  
F 3.537284 1.579220 4.172613

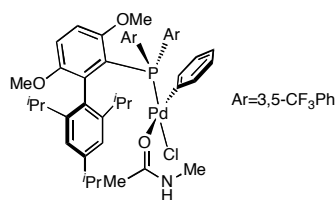

**Complex 9F**

C -4.143101 -2.360818 -0.326216  
 C -5.102990 -1.350146 -0.306649  
 C -4.820052 -0.206627 0.441881  
 C -3.626574 -0.055020 1.155805  
 C -2.660789 -1.098541 1.117086  
 C -2.934452 -2.276139 0.376407  
 H -4.350059 -3.251266 -0.910457  
 H -5.551870 0.594869 0.475404  
 C -1.494129 -1.005322 2.077875  
 C -0.239589 -0.379508 1.852821  
 C -1.777025 -1.489110 3.386496  
 C 0.627390 -0.152525 2.964187  
 C -0.864135 -1.349755 4.427349  
 C 0.331069 -0.667839 4.221632  
 H -1.082422 -1.737751 5.415013  
 H 1.014628 -0.534846 5.051000  
 P 0.380438 0.143853 0.164982  
 C -1.995368 -3.486050 0.349465  
 H -0.974347 -3.117910 0.500134  
 C -6.405232 -1.499956 -1.082574  
 H -6.392329 -2.498842 -1.539193  
 C -6.510618 -0.474163 -2.227731  
 H -6.547529 0.551259 -1.839369  
 H -5.653604 -0.547100 -2.905598  
 H -7.423912 -0.641015 -2.811690  
 C -7.637681 -1.429323 -0.161334  
 H -8.556983 -1.600726 -0.734138  
 H -7.584255 -2.182891 0.632410  
 H -7.724098 -0.446013 0.316372  
 C -3.455614 1.214575 1.997640  
 H -2.387343 1.350838 2.198396  
 C -3.957845 2.486541 1.285648  
 H -3.598849 3.378589 1.808812  
 H -3.622535 2.542388 0.246520  
 H -5.053083 2.537031 1.279273  
 C -4.169969 1.093068 3.361283  
 H -4.017134 2.003694 3.953601  
 H -5.249187 0.964098 3.214713  
 H -3.809598 0.239484 3.938882  
 C -2.017896 -4.240003 -0.994800  
 H -1.216087 -4.986208 -1.012999  
 H -2.957295 -4.789191 -1.129810  
 H -1.881975 -3.572639 -1.849621  
 C -2.316322 -4.485485 1.483228  
 H -3.336941 -4.872124 1.372933  
 H -1.629761 -5.340783 1.438942

H -2.239424 -4.031199 2.472079  
 O -3.002139 -2.073967 3.556103  
 O 1.747406 0.587768 2.726432  
 C -3.348238 -2.576763 4.836382  
 H -3.362077 -1.781270 5.593377  
 H -4.352695 -2.988890 4.728536  
 H -2.663062 -3.372269 5.158625  
 C 2.702119 0.786706 3.762515  
 H 3.204094 -0.153440 4.022692  
 H 3.427073 1.493907 3.357420  
 H 2.240048 1.224835 4.654839  
 C 0.641772 1.982940 0.324307  
 C 1.887944 2.531686 0.644481  
 C -0.442770 2.852649 0.130232  
 C 2.050001 3.910498 0.785957  
 H 2.743991 1.889570 0.799344  
 C -0.276748 4.231995 0.285648  
 H -1.409528 2.461621 -0.161265  
 C 0.969096 4.769006 0.613143  
 H 1.094182 5.839440 0.721955  
 C 2.124796 -0.499657 0.087550  
 C 2.938370 -0.041033 -0.957635  
 C 2.636736 -1.474518 0.947214  
 C 4.244017 -0.512709 -1.107826  
 H 2.560764 0.694390 -1.661157  
 C 3.949485 -1.930650 0.805427  
 H 2.022049 -1.881666 1.740939  
 C 4.765470 -1.452859 -0.218765  
 H 5.785279 -1.802803 -0.322501  
 Pd -0.452624 -0.747188 -1.869578  
 C -1.323812 0.945817 -2.468109  
 C -2.698597 1.146645 -2.325323  
 C -0.547335 1.895560 -3.139650  
 C -3.289128 2.305942 -2.843274  
 H -3.313052 0.403007 -1.830863  
 C -1.145104 3.050899 -3.656957  
 H 0.518392 1.737520 -3.284170  
 C -2.516500 3.260215 -3.508280  
 H -4.361069 2.453385 -2.732110  
 H -0.533791 3.780685 -4.183199  
 H -2.980224 4.157233 -3.910031  
 O 0.765401 -2.686946 -1.379442  
 C 1.497456 -3.393315 -2.098795  
 N 1.949075 -4.594242 -1.664768  
 H 2.560490 -5.108101 -2.282196  
 C 1.960943 -2.975200 -3.473427  
 H 1.091598 -2.635241 -4.043717  
 H 2.653952 -2.132692 -3.381951  
 H 2.467543 -3.783482 -4.010244  
 C 1.658974 -5.170168 -0.361004  
 H 1.390835 -6.225558 -0.470900  
 H 2.516097 -5.085355 0.315066  
 H 0.817480 -4.631710 0.072542  
 Cl -1.237299 -1.678735 -3.927387  
 C 3.417669 4.434504 1.132331  
 C -1.449519 5.171169 0.155563

C 5.067895 -0.040008 -2.277112  
 C 4.496348 -2.880066 1.836582  
 F 3.891341 3.859223 2.269602  
 F 4.316403 4.156535 0.163423  
 F 3.424502 5.767226 1.326211  
 F -1.067104 6.377099 -0.319924  
 F -2.406516 4.693920 -0.658619  
 F -2.027062 5.396938 1.363633  
 F 4.830853 1.255302 -2.564743  
 F 4.782708 -0.750396 -3.397546  
 F 6.390255 -0.178790 -2.050193  
 F 5.636348 -3.475167 1.436129  
 F 3.609534 -3.859773 2.139846  
 F 4.765901 -2.238951 3.001448

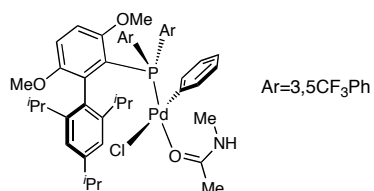

**Complex 9g**

C -4.276671 -1.890486 0.478186  
 C -5.076608 -0.760178 0.311541  
 C -4.597729 0.452015 0.809635  
 C -3.358711 0.557318 1.450784  
 C -2.551272 -0.604537 1.586481  
 C -3.030852 -1.857035 1.118994  
 H -4.646955 -2.838259 0.101725  
 H -5.210627 1.343349 0.710755  
 C -1.312832 -0.508800 2.449877  
 C 0.004095 -0.178744 2.037394  
 C -1.557809 -0.683627 3.841165  
 C 1.007507 0.030536 3.033134  
 C -0.541713 -0.552795 4.781977  
 C 0.738961 -0.188960 4.379528  
 H -0.735382 -0.709425 5.836248  
 H 1.515511 -0.070091 5.124809  
 P 0.569070 0.003892 0.262081  
 C -2.275555 -3.177988 1.319128  
 H -1.205270 -2.970315 1.220586  
 C -6.436478 -0.864148 -0.367424  
 H -6.553395 -1.906557 -0.694316  
 C -6.530967 0.025569 -1.621031  
 H -6.448807 1.088081 -1.362226  
 H -5.731355 -0.207344 -2.333189  
 H -7.493867 -0.118028 -2.126625  
 C -7.585221 -0.557494 0.613182  
 H -8.558695 -0.689889 0.125301  
 H -7.546923 -1.219230 1.485491  
 H -7.531668 0.476033 0.976070  
 C -2.977822 1.915414 2.051857  
 H -1.898518 1.915926 2.238996  
 C -3.288469 3.109721 1.128894  
 H -2.829192 4.019039 1.528989

H -2.920499 2.959914 0.110261  
 H -4.367088 3.295800 1.063327  
 C -3.677683 2.144915 3.409742  
 H -3.365398 3.104249 3.840555  
 H -4.766171 2.174618 3.277211  
 H -3.451733 1.350800 4.123397  
 C -2.616356 -4.244434 0.261305  
 H -1.897235 -5.066148 0.335155  
 H -3.616454 -4.667865 0.423134  
 H -2.550198 -3.847029 -0.753217  
 C -2.520211 -3.797436 2.714135  
 H -3.592090 -3.958168 2.884326  
 H -2.020301 -4.771742 2.773904  
 H -2.141996 -3.175305 3.525658  
 O -2.849080 -0.974760 4.188195  
 O 2.227574 0.451720 2.596024  
 C -3.147108 -1.235257 5.549821  
 H -2.949341 -0.360229 6.183556  
 H -4.213195 -1.465923 5.578677  
 H -2.579746 -2.094947 5.930354  
 C 3.324824 0.525102 3.498418  
 H 3.605571 -0.472499 3.857940  
 H 4.144665 0.956250 2.922019  
 H 3.105187 1.183479 4.347166  
 C 1.240331 1.741756 0.216234  
 C 2.611677 2.015669 0.232705  
 C 0.345430 2.818632 0.179588  
 C 3.078616 3.330684 0.228765  
 H 3.329758 1.206653 0.267836  
 C 0.817748 4.134536 0.175440  
 H -0.721125 2.637462 0.137525  
 C 2.186529 4.399797 0.201843  
 H 2.549339 5.419994 0.195028  
 C 2.089141 -1.050415 0.130732  
 C 2.854678 -0.951744 -1.036423  
 C 2.445340 -2.005000 1.083934  
 C 3.970316 -1.766962 -1.228209  
 H 2.577774 -0.248480 -1.815304  
 C 3.572086 -2.806670 0.896906  
 H 1.845874 -2.142818 1.975556  
 C 4.343944 -2.695908 -0.257775  
 H 5.214901 -3.323164 -0.401827  
 Pd -0.679732 -0.683930 -1.557140  
 C -1.186310 1.162463 -2.196324  
 C -2.531231 1.551349 -2.193277  
 C -0.254742 1.948312 -2.888660  
 C -2.934694 2.709054 -2.869465  
 H -3.270542 0.951818 -1.670729  
 C -0.661472 3.101627 -3.570676  
 H 0.797598 1.672553 -2.902560  
 C -2.002709 3.486775 -3.560383  
 H -3.982914 3.000245 -2.855104  
 H 0.074378 3.697748 -4.106264  
 H -2.318780 4.385678 -4.083348  
 O -1.871772 -1.376739 -3.246942  
 C -1.428125 -1.873652 -4.302428

N -2.271513 -2.521527 -5.128277  
 H -1.901778 -2.919240 -5.978207  
 C 0.020134 -1.784794 -4.707371  
 H 0.327612 -0.734740 -4.683449  
 H 0.610257 -2.329201 -3.962180  
 H 0.211981 -2.194666 -5.703696  
 C -3.679033 -2.717020 -4.805438  
 H -4.129536 -3.344567 -5.576955  
 H -3.780219 -3.205797 -3.832255  
 H -4.205424 -1.757945 -4.766791  
 Cl 0.085468 -3.037874 -1.346124  
 C 4.565878 3.553491 0.286152  
 C -0.167224 5.275671 0.170220  
 C 4.722886 -1.670400 -2.528166  
 C 3.968638 -3.744026 2.004821  
 F 5.098362 3.006907 1.410740  
 F 5.197475 2.972487 -0.756245  
 F 4.891641 4.860919 0.284845  
 F 0.416698 6.444442 -0.172025  
 F -1.182497 5.059247 -0.688089  
 F -0.718603 5.456386 1.397076  
 F 4.881164 -0.383225 -2.914656  
 F 4.065235 -2.297530 -3.530145  
 F 5.950236 -2.225597 -2.448089  
 F 4.904842 -4.632965 1.618527  
 F 2.913210 -4.434960 2.481824  
 F 4.485413 -3.055693 3.059672

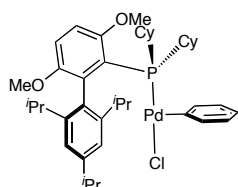

**Complex 10a**

C 3.444836 -0.667467 -1.343274  
 C 4.108862 -1.053962 -0.181375  
 C 3.610149 -0.587110 1.037849  
 C 2.498737 0.248384 1.121581  
 C 1.828941 0.648852 -0.079196  
 C 2.331671 0.176800 -1.330721  
 H 3.813296 -1.034564 -2.297304  
 H 4.105957 -0.884737 1.956610  
 C 0.983333 1.909793 -0.055417  
 C -0.425719 1.994763 0.007354  
 C 1.742480 3.112566 -0.119029  
 C -1.037198 3.278814 0.002050  
 C 1.118942 4.354877 -0.109823  
 C -0.270775 4.438088 -0.049748  
 H 1.697720 5.269697 -0.154569  
 H -0.737587 5.415390 -0.050180  
 P -1.434069 0.424779 0.007417  
 C 1.754908 0.625358 -2.672116

H 0.839622 1.189324 -2.474923  
 C 5.357292 -1.920661 -0.256579  
 H 5.415960 -2.306258 -1.283214  
 C 5.305377 -3.134163 0.688413  
 H 5.329765 -2.826156 1.740829  
 H 4.391716 -3.713128 0.528288  
 H 6.173379 -3.782263 0.516990  
 C 6.623778 -1.075957 -0.005587  
 H 7.525576 -1.691161 -0.112110  
 H 6.694693 -0.240790 -0.711933  
 H 6.621842 -0.657444 1.008458  
 C 2.078970 0.754756 2.500617  
 H 1.111571 1.254012 2.394619  
 C 1.904854 -0.396562 3.511743  
 H 1.438295 -0.025551 4.432573  
 H 1.286185 -1.201560 3.103005  
 H 2.869203 -0.836134 3.790251  
 C 3.074274 1.796372 3.053081  
 H 2.736304 2.167878 4.028471  
 H 4.067918 1.353128 3.189323  
 H 3.180120 2.648844 2.376680  
 C 1.376077 -0.566709 -3.572092  
 H 0.866952 -0.211224 -4.476482  
 H 2.259420 -1.130900 -3.891863  
 H 0.715577 -1.263831 -3.046035  
 C 2.724120 1.571955 -3.410430  
 H 3.655901 1.055990 -3.670250  
 H 2.270762 1.932790 -4.341973  
 H 2.983289 2.437573 -2.793514  
 O 3.101175 2.963747 -0.194813  
 O -2.405436 3.315118 0.042208  
 C 3.910489 4.125943 -0.264989  
 H 3.791849 4.756650 0.626261  
 H 4.939308 3.766190 -0.317027  
 H 3.688255 4.720620 -1.161200  
 C -3.062104 4.572539 0.024508  
 H -2.838261 5.130988 -0.893603  
 H -4.129873 4.349817 0.061452  
 H -2.789059 5.182373 0.895396  
 Pd 0.080803 -1.372734 -0.082506  
 C -2.484932 0.318114 1.575139  
 C -1.609806 0.400774 2.840296  
 C -3.731304 1.213909 1.737737  
 H -2.836013 -0.720022 1.494946  
 C -2.404222 0.013752 4.099760  
 H -1.227334 1.425783 2.949129  
 H -0.739936 -0.254758 2.738775  
 C -4.538176 0.784341 2.976949  
 H -3.421275 2.256302 1.854288  
 H -4.369818 1.173158 0.848905  
 C -3.684123 0.848146 4.251135  
 H -1.766674 0.124979 4.986162  
 H -2.671960 -1.051052 4.039661  
 H -5.423229 1.425963 3.079221  
 H -4.910082 -0.241024 2.835725  
 H -4.262650 0.504593 5.118106

H -3.413019 1.895906 4.450124  
 C -2.688534 0.653762 -1.384363  
 C -2.007786 0.870698 -2.749548  
 C -3.708834 -0.501138 -1.469916  
 H -3.227799 1.571701 -1.131827  
 C -3.045170 1.124971 -3.857344  
 H -1.409743 -0.013996 -3.003002  
 H -1.316130 1.719666 -2.699222  
 C -4.751810 -0.225819 -2.567629  
 H -3.190302 -1.438794 -1.690036  
 H -4.217144 -0.650331 -0.510796  
 C -4.087355 0.000541 -3.932619  
 H -2.533112 1.239081 -4.821481  
 H -3.556100 2.079380 -3.659919  
 H -5.455723 -1.065888 -2.620115  
 H -5.343543 0.662608 -2.298888  
 H -4.843500 0.232357 -4.693647  
 H -3.594600 -0.929362 -4.252037  
 Cl 1.533846 -3.264355 -0.082858  
 C -1.377986 -2.759376 0.023370  
 C -1.772715 -3.445430 -1.130840  
 C -1.929237 -3.120190 1.256238  
 C -2.742049 -4.450854 -1.054363  
 H -1.317233 -3.214270 -2.089092  
 C -2.898518 -4.129181 1.328538  
 H -1.591642 -2.641412 2.170928  
 C -3.313856 -4.791767 0.173615  
 H -3.039957 -4.975790 -1.959434  
 H -3.316406 -4.401150 2.295495  
 H -4.063207 -5.577109 0.230622

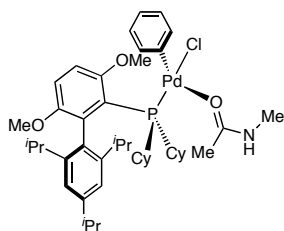

**Complex 10b**

C -4.458356 -1.170871 -0.491710  
 C -5.056570 -0.019721 -1.005187  
 C -4.499177 1.210230 -0.649005  
 C -3.377751 1.309600 0.181588  
 C -2.762884 0.125188 0.662739  
 C -3.333008 -1.135188 0.342762  
 H -4.892544 -2.134276 -0.744416  
 H -4.961390 2.123553 -1.013673  
 C -1.618982 0.202397 1.653011  
 C -0.227221 0.244859 1.369501  
 C -2.043781 0.216147 3.012021  
 C 0.675985 0.242656 2.476754  
 C -1.135725 0.188915 4.063339  
 C 0.228422 0.189529 3.792095  
 H -1.470168 0.176672 5.093599

H 0.935343 0.182721 4.612994  
 P 0.683583 0.426693 -0.283769  
 C -2.814117 -2.458461 0.917896  
 H -1.766713 -2.318113 1.204220  
 C -6.283174 -0.111451 -1.903552  
 H -6.511799 -1.178764 -2.027944  
 C -6.015801 0.468823 -3.305582  
 H -5.793558 1.541643 -3.256643  
 H -5.164156 -0.027285 -3.784349  
 H -6.892631 0.340115 -3.951681  
 C -7.515966 0.551758 -1.259576  
 H -8.400296 0.425319 -1.895814  
 H -7.734523 0.113602 -0.279568  
 H -7.359751 1.627725 -1.116904  
 C -2.901234 2.705356 0.586853  
 H -1.906904 2.606457 1.033510  
 C -2.781769 3.678123 -0.602363  
 H -2.311692 4.614373 -0.278405  
 H -2.180635 3.260105 -1.417192  
 H -3.762740 3.937797 -1.016166  
 C -3.827924 3.308023 1.664317  
 H -3.447296 4.280120 2.001860  
 H -4.837747 3.462390 1.264599  
 H -3.908458 2.643689 2.528375  
 C -2.864854 -3.636902 -0.075207  
 H -2.302661 -4.482313 0.333850  
 H -3.892921 -3.977950 -0.247403  
 H -2.426457 -3.388608 -1.044494  
 C -3.598718 -2.860481 2.186746  
 H -4.654990 -3.032894 1.944536  
 H -3.193195 -3.791195 2.602125  
 H -3.556409 -2.087803 2.955193  
 O -3.402374 0.262183 3.212351  
 O 2.004521 0.337454 2.181882  
 C -3.889862 0.293897 4.543124  
 H -3.524856 1.175152 5.087561  
 H -4.976786 0.346606 4.458483  
 H -3.614955 -0.612878 5.098656  
 C 2.980221 0.034355 3.172384  
 H 2.761385 -0.920164 3.664504  
 H 3.921783 -0.050841 2.629466  
 H 3.043154 0.832603 3.923975  
 Pd 2.734903 -0.876403 -0.260692  
 C 1.784699 -2.630053 -0.084067  
 C 1.170145 -3.013439 1.111355  
 C 1.878871 -3.563112 -1.126201  
 C 0.649281 -4.306650 1.260756  
 H 1.099368 -2.320834 1.943423  
 C 1.347562 -4.846832 -0.980077  
 H 2.388894 -3.300181 -2.047950  
 C 0.731429 -5.226446 0.215616  
 H 0.185846 -4.590254 2.203712  
 H 1.433395 -5.558003 -1.798962  
 H 0.331675 -6.230648 0.333294  
 C -0.535767 0.106631 -1.704797  
 C -0.224240 0.904807 -2.991680



C -0.601648 -1.392719 -2.048414  
 H -1.516356 0.432586 -1.350267  
 C -1.263836 0.613890 -4.090482  
 H 0.774434 0.635409 -3.364385  
 H -0.217993 1.981410 -2.799699  
 C -1.635951 -1.690340 -3.146216  
 H 0.387107 -1.718402 -2.390142  
 H -0.815104 -1.984228 -1.155968  
 C -1.352437 -0.881065 -4.417337  
 H -1.010530 1.191931 -4.988988  
 H -2.248314 0.970945 -3.754142  
 H -1.628759 -2.765271 -3.368726  
 H -2.642343 -1.449849 -2.776918  
 H -2.128052 -1.061541 -5.173010  
 H -0.400658 -1.213846 -4.857254  
 C 0.887566 2.333054 -0.365412  
 C 1.153209 3.054867 0.973824  
 C 1.955654 2.790907 -1.384856  
 H -0.097545 2.666326 -0.720421  
 C 1.122424 4.584266 0.791342  
 H 2.131470 2.747958 1.359849  
 H 0.411726 2.773303 1.727163  
 C 1.899989 4.313575 -1.597888  
 H 2.935372 2.513581 -0.991861  
 H 1.851018 2.278180 -2.343567  
 C 2.113992 5.064255 -0.276614  
 H 1.333270 5.069273 1.753666  
 H 0.106235 4.893500 0.504827  
 H 2.659949 4.610853 -2.332538  
 H 0.925873 4.595102 -2.025825  
 H 2.019524 6.147655 -0.426773  
 H 3.140304 4.883084 0.075303  
 Cl 4.772445 -2.168314 0.003570  
 O 4.197331 0.923006 -0.285814  
 C 5.245861 0.930135 -0.956876  
 N 6.379419 1.489179 -0.474720  
 C 5.324033 0.346002 -2.347078  
 H 5.337726 -0.744142 -2.243298  
 H 4.423218 0.623226 -2.901152  
 H 6.209566 0.675813 -2.900119  
 C 6.521825 1.951643 0.896623  
 H 7.046577 1.211882 1.512848  
 H 7.073176 2.896980 0.919072  
 H 5.522864 2.104756 1.304345  
 H 7.216542 1.395020 -1.031854

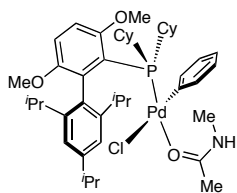

Complex **10g**

C 3.282159 0.973293 -1.303955  
 C 3.998278 1.353910 -0.169523

C 3.297658 2.000467 0.848970  
 C 1.923229 2.248785 0.766252  
 C 1.208840 1.830339 -0.392086  
 C 1.909810 1.214372 -1.459245  
 H 3.821501 0.483464 -2.107994  
 H 3.834041 2.328114 1.735912  
 C -0.212542 2.336796 -0.528683  
 C -1.419791 1.704150 -0.123945  
 C -0.259581 3.693307 -0.969113  
 C -2.589141 2.519607 -0.039942  
 C -1.437809 4.425897 -0.959115  
 C -2.598792 3.843214 -0.464249  
 H -1.463318 5.455317 -1.295228  
 H -3.505331 4.433150 -0.419238  
 P -1.678845 -0.157719 0.194956  
 C 1.249573 0.856802 -2.795249  
 H 0.228106 0.523714 -2.587439  
 C 5.493750 1.084118 -0.066552  
 H 5.783463 0.533330 -0.972191  
 C 5.840013 0.195713 1.143470  
 H 5.610222 0.703721 2.088030  
 H 5.271754 -0.740498 1.124229  
 H 6.909542 -0.048464 1.151058  
 C 6.309144 2.391230 -0.042385  
 H 7.385151 2.178392 -0.023256  
 H 6.097346 3.005422 -0.924602  
 H 6.071942 2.989732 0.845402  
 C 1.279800 3.036151 1.915243  
 H 0.194811 3.014255 1.780804  
 C 1.576273 2.439789 3.305498  
 H 1.008277 2.980791 4.072409  
 H 1.307174 1.382291 3.363132  
 H 2.637141 2.529356 3.567624  
 C 1.719528 4.515741 1.889658  
 H 1.203165 5.083078 2.674217  
 H 2.798033 4.603358 2.069508  
 H 1.505669 4.980273 0.924397  
 C 1.946906 -0.299482 -3.533806  
 H 1.312545 -0.635435 -4.358487  
 H 2.910226 0.014606 -3.957434  
 H 2.106708 -1.158787 -2.878185  
 C 1.170187 2.068802 -3.750132  
 H 2.171484 2.471718 -3.948480  
 H 0.736933 1.754365 -4.707450  
 H 0.557176 2.877699 -3.350099  
 O 0.935433 4.235129 -1.368192  
 O -3.715039 1.943394 0.486559  
 C 0.938904 5.540121 -1.919095  
 H 0.628471 6.294727 -1.183191  
 H 1.971713 5.732621 -2.214814  
 H 0.289937 5.608869 -2.802530  
 C -4.877474 2.735458 0.665907  
 H -5.282179 3.086780 -0.292062  
 H -5.609783 2.083534 1.145677  
 H -4.678072 3.597600 1.315075  
 Pd 0.021028 -1.716143 -0.357872

C 0.797687 -1.916399 1.493602  
 C 1.777113 -1.067932 2.014214  
 C 0.540503 -3.126618 2.159547  
 C 2.476205 -1.411907 3.179842  
 H 2.014132 -0.140672 1.509933  
 C 1.235506 -3.469579 3.324577  
 H -0.205003 -3.817793 1.772561  
 C 2.206019 -2.609298 3.842921  
 H 3.237248 -0.735437 3.563263  
 H 1.016504 -4.411504 3.823810  
 H 2.747241 -2.872970 4.748257  
 O 1.700571 -3.068474 -0.895357  
 C 1.688976 -4.236611 -1.324637  
 N 2.806088 -4.780913 -1.857574  
 H 2.753626 -5.734985 -2.182594  
 C 0.462985 -5.113198 -1.277308  
 H 0.117631 -5.181197 -0.241350  
 H -0.318816 -4.618265 -1.863189  
 H 0.641513 -6.121716 -1.663102  
 C 4.066070 -4.069063 -2.002398  
 H 4.837367 -4.499300 -1.352728  
 H 4.409487 -4.108323 -3.041482  
 H 3.899442 -3.030760 -1.716804  
 Cl -0.773493 -2.171194 -2.709219  
 C -2.406816 -0.259329 1.937199  
 C -2.584374 -1.707679 2.435417  
 C -1.630646 0.561548 2.983551  
 H -3.397844 0.189137 1.834674  
 C -3.341648 -1.725988 3.775197  
 H -1.601806 -2.159853 2.579592  
 H -3.108978 -2.325391 1.698101  
 C -2.356115 0.539228 4.341217  
 H -0.623906 0.143552 3.099603  
 H -1.513671 1.597686 2.647498  
 C -2.606738 -0.893032 4.835794  
 H -3.457476 -2.762098 4.118802  
 H -4.357806 -1.327360 3.632807  
 H -1.770674 1.100752 5.080798  
 H -3.319611 1.062103 4.242433  
 H -3.176950 -0.876950 5.773883  
 H -1.642461 -1.371301 5.060134  
 C -3.121004 -0.665260 -0.976024  
 C -4.534029 -0.865252 -0.386899  
 C -3.190848 0.187660 -2.261373  
 H -2.762156 -1.648164 -1.293016  
 C -5.446223 -1.540649 -1.430472  
 H -4.970679 0.095466 -0.102429  
 H -4.511341 -1.485508 0.513765  
 C -4.116582 -0.472261 -3.297988  
 H -3.566662 1.190915 -2.026920  
 H -2.193396 0.297543 -2.694630  
 C -5.519256 -0.729556 -2.731210  
 H -6.449830 -1.674434 -1.004267  
 H -5.061728 -2.546823 -1.651004  
 H -4.177504 0.164740 -4.190400  
 H -3.662623 -1.419521 -3.615648

H -6.141941 -1.250868 -3.470175  
 H -6.015011 0.232443 -2.527684

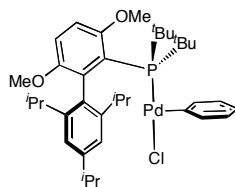

**Complex 11a**

C 3.131923 -0.405152 -1.363085  
 C 3.725966 -1.006035 -0.257887  
 C 3.177017 -0.736582 1.000006  
 C 2.080107 0.102621 1.174470  
 C 1.464352 0.703518 0.028585  
 C 2.032953 0.453356 -1.256782  
 H 3.543856 -0.609648 -2.347628  
 H 3.628993 -1.190335 1.877183  
 C 0.618117 1.950147 0.210314  
 C -0.793185 2.062637 0.154049  
 C 1.399177 3.127240 0.400933  
 C -1.364780 3.364051 0.234940  
 C 0.802356 4.372233 0.552819  
 C -0.581402 4.490379 0.461501  
 H 1.397353 5.262721 0.716183  
 H -1.030243 5.472136 0.546809  
 P -1.866340 0.524323 -0.043382  
 C 1.560339 1.161732 -2.525024  
 H 0.690714 1.772513 -2.267560  
 C 4.956904 -1.886070 -0.418239  
 H 5.072230 -2.081373 -1.492708  
 C 4.813307 -3.247403 0.285364  
 H 4.770597 -3.133292 1.375486  
 H 3.901107 -3.757574 -0.036268  
 H 5.676939 -3.883503 0.056273  
 C 6.224202 -1.146694 0.058274  
 H 7.115131 -1.766642 -0.099458  
 H 6.364020 -0.203475 -0.482255  
 H 6.164134 -0.913270 1.128533  
 C 1.632982 0.408674 2.603078  
 H 0.698774 0.973544 2.547294  
 C 1.364227 -0.869638 3.420923  
 H 0.892001 -0.616546 4.377924  
 H 0.711612 -1.562016 2.882132  
 H 2.293589 -1.404306 3.646714  
 C 2.657248 1.294074 3.344282  
 H 2.297162 1.529573 4.353500  
 H 3.619484 0.778115 3.444460  
 H 2.835442 2.231289 2.811479  
 C 1.132060 0.166230 -3.620783  
 H 0.717579 0.703143 -4.483248  
 H 1.980365 -0.427936 -3.977448  
 H 0.381131 -0.538211 -3.248215  
 C 2.638358 2.125822 -3.063080  
 H 3.531020 1.580048 -3.389674

H 2.254291 2.683542 -3.926084  
 H 2.947448 2.843318 -2.296696  
 O 2.757538 2.953521 0.414816  
 O -2.714461 3.461801 0.040212  
 C 3.587662 4.092097 0.573308  
 H 3.417248 4.587680 1.538606  
 H 4.611778 3.717188 0.537857  
 H 3.437814 4.817816 -0.237218  
 C -3.346798 4.720344 0.207455  
 H -2.986129 5.454193 -0.524544  
 H -4.411308 4.544056 0.042305  
 H -3.198550 5.114012 1.221146  
 Pd -0.302342 -1.317461 -0.316670  
 Cl 1.168232 -3.083815 -0.934403  
 C -1.543373 -2.882694 0.018764  
 C -2.254800 -3.531706 -0.994226  
 C -1.577505 -3.408098 1.315947  
 C -3.048990 -4.644962 -0.696704  
 H -2.180359 -3.198497 -2.022374  
 C -2.370886 -4.523272 1.609134  
 H -0.981503 -2.967438 2.108746  
 C -3.120271 -5.139161 0.606378  
 H -3.599831 -5.133963 -1.497294  
 H -2.389983 -4.911688 2.625063  
 H -3.735168 -6.006301 0.833135  
 C -2.976543 0.390544 1.546796  
 C -2.974327 0.784565 -1.639024  
 C -3.966175 -0.780747 1.360343  
 H -4.456466 -0.971085 2.324091  
 H -4.754817 -0.550701 0.640355  
 H -3.473383 -1.702495 1.054005  
 C -2.017110 0.044543 2.701192  
 H -1.419468 -0.841996 2.486301  
 H -1.341470 0.876338 2.922583  
 H -2.605245 -0.153631 3.606976  
 C -3.775960 1.634102 1.983309  
 H -3.125636 2.472041 2.243908  
 H -4.494806 1.969403 1.235184  
 H -4.339334 1.361352 2.886338  
 C -2.220644 1.684703 -2.636393  
 H -1.233331 1.288469 -2.880126  
 H -2.794596 1.721770 -3.571912  
 H -2.110555 2.708541 -2.272935  
 C -4.382270 1.374238 -1.421575  
 H -4.869770 1.445307 -2.403289  
 H -5.016345 0.738026 -0.800874  
 H -4.353890 2.372755 -0.991355  
 C -3.145587 -0.601795 -2.287364  
 H -3.670500 -1.304491 -1.635335  
 H -3.733247 -0.492928 -3.208838  
 H -2.179472 -1.041961 -2.547032

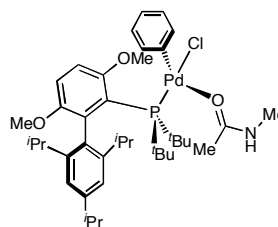

**Complex 11b**

C 4.273480 1.370966 -1.084756  
 C 5.091184 0.311669 -1.475830  
 C 4.812229 -0.944266 -0.937822  
 C 3.750228 -1.166037 -0.052308  
 C 2.880287 -0.090978 0.273696  
 C 3.187925 1.210649 -0.214539  
 H 4.495273 2.362383 -1.468631  
 H 5.457343 -1.780833 -1.192503  
 C 1.801439 -0.225303 1.337780  
 C 0.386260 -0.380630 1.190396  
 C 2.341057 -0.056270 2.648597  
 C -0.404260 -0.243802 2.380268  
 C 1.541018 -0.020299 3.782027  
 C 0.163080 -0.094905 3.641170  
 H 1.968263 0.092223 4.770818  
 H -0.463979 -0.030260 4.521342  
 P -0.760762 -0.838305 -0.292386  
 C 2.421051 2.469036 0.213989  
 H 1.409439 2.173490 0.507170  
 C 6.254720 0.534146 -2.432988  
 H 6.263721 1.603231 -2.686060  
 C 6.071006 -0.248937 -3.747015  
 H 6.064860 -1.330670 -3.567067  
 H 5.125725 0.013323 -4.234744  
 H 6.888047 -0.031454 -4.445627  
 C 7.610408 0.204892 -1.779162  
 H 8.435693 0.426988 -2.466497  
 H 7.760953 0.789119 -0.864666  
 H 7.676948 -0.856517 -1.512069  
 C 3.654278 -2.556561 0.581505  
 H 2.707598 -2.614208 1.122462  
 C 3.689258 -3.705947 -0.447691  
 H 3.462304 -4.658621 0.045383  
 H 2.971688 -3.565627 -1.260700  
 H 4.682323 -3.806998 -0.900793  
 C 4.784853 -2.779484 1.609855  
 H 4.673583 -3.759725 2.090325  
 H 5.766277 -2.756716 1.120851  
 H 4.774337 -2.007975 2.381257  
 C 2.281003 3.527931 -0.898500  
 H 1.556126 4.285573 -0.586296  
 H 3.230360 4.040945 -1.094763  
 H 1.927306 3.099968 -1.840532  
 C 3.083480 3.135787 1.440019  
 H 4.101493 3.464366 1.196374  
 H 2.506549 4.018121 1.742223

H 3.147180 2.458152 2.293025  
 O 3.705152 0.089743 2.721975  
 O -1.760371 -0.260683 2.231067  
 C 4.293764 0.344360 3.985990  
 H 4.139823 -0.489710 4.684056  
 H 5.362309 0.459954 3.795647  
 H 3.903725 1.267484 4.435199  
 C -2.612149 -0.086047 3.351654  
 H -2.407471 0.860774 3.866514  
 H -3.622212 -0.058082 2.941439  
 H -2.517344 -0.918517 4.061772  
 Pd -2.875018 0.399596 -0.321118  
 C -2.036188 2.213935 -0.219324  
 C -1.510881 2.741606 0.963871  
 C -2.144418 3.049526 -1.341433  
 C -1.102473 4.080463 1.026338  
 H -1.434110 2.125141 1.850827  
 C -1.728303 4.382547 -1.279073  
 H -2.581732 2.675337 -2.262400  
 C -1.209707 4.906774 -0.092649  
 H -0.708610 4.475067 1.960967  
 H -1.828658 5.015463 -2.158161  
 H -0.902375 5.948337 -0.039752  
 Cl -5.005366 1.556281 -0.179304  
 O -4.230778 -1.504599 -0.581079  
 C -5.338681 -1.421116 -1.146997  
 N -6.478645 -1.686320 -0.480068  
 C -5.473774 -1.038009 -2.602604  
 H -5.353454 0.048901 -2.664119  
 H -4.674365 -1.509057 -3.179823  
 H -6.442943 -1.315738 -3.029230  
 C -6.502202 -1.811722 0.972156  
 H -6.222114 -0.861043 1.439209  
 H -7.510239 -2.096188 1.282085  
 H -5.799453 -2.586352 1.287118  
 H -7.349015 -1.479896 -0.949420  
 C -1.066454 -2.749835 0.072235  
 C -0.012960 -0.670354 -2.075349  
 C -1.728000 -3.439968 -1.139897  
 H -1.963114 -4.473281 -0.851891  
 H -2.663484 -2.952416 -1.417675  
 H -1.071076 -3.496920 -2.009960  
 C 0.241312 -3.482401 0.407910  
 H 0.985277 -3.407683 -0.384277  
 H 0.681051 -3.108946 1.335795  
 H 0.020253 -4.548762 0.554032  
 C -2.017603 -2.943384 1.274327  
 H -1.555343 -2.640315 2.215370  
 H -2.960328 -2.412391 1.143925  
 H -2.235835 -4.017584 1.351276  
 C -1.208380 -0.795437 -3.054069  
 H -1.978864 -0.049610 -2.833602  
 H -0.830915 -0.609273 -4.068158  
 H -1.678060 -1.778732 -3.051929  
 C 0.541083 0.752377 -2.253221  
 H 1.475397 0.883752 -1.715862

H 0.750896 0.909772 -3.320165  
 H -0.167167 1.519281 -1.935277  
 C 1.082029 -1.672143 -2.477752  
 H 1.402097 -1.441222 -3.502868  
 H 1.962258 -1.588682 -1.839552  
 H 0.737758 -2.709219 -2.476103

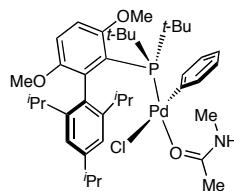

### Complex 11g

C 1.771523 2.556836 -1.157233  
 C 1.976332 3.382993 -0.052903  
 C 0.947445 3.473029 0.884606  
 C -0.244456 2.753043 0.752544  
 C -0.417598 1.889571 -0.369517  
 C 0.593567 1.823697 -1.358824  
 H 2.558998 2.494011 -1.900717  
 H 1.068629 4.126624 1.744788  
 C -1.827117 1.352378 -0.533141  
 C -2.396960 0.169951 0.035844  
 C -2.694085 2.346643 -1.075771  
 C -3.803500 0.207224 0.276466  
 C -4.075537 2.237532 -0.996920  
 C -4.624847 1.191184 -0.268332  
 H -4.728602 2.988425 -1.424576  
 H -5.697359 1.156532 -0.127996  
 P -1.513002 -1.543458 0.152366  
 C 0.437475 1.034241 -2.662094  
 H -0.110597 0.118599 -2.427903  
 C 3.271227 4.170057 0.100261  
 H 3.920102 3.886580 -0.739970  
 C 4.016828 3.812085 1.399721  
 H 3.441986 4.113932 2.283712  
 H 4.193002 2.733428 1.472180  
 H 4.985199 4.325619 1.444176  
 C 3.030638 5.689068 0.003874  
 H 3.978938 6.237451 0.063028  
 H 2.541223 5.952909 -0.940190  
 H 2.390265 6.041584 0.821464  
 C -1.331129 3.001310 1.809397  
 H -2.166406 2.324859 1.617849  
 C -0.859074 2.716362 3.248512  
 H -1.688248 2.869118 3.950415  
 H -0.503433 1.688508 3.360863  
 H -0.047045 3.387290 3.553381  
 C -1.877051 4.441402 1.708786  
 H -2.711165 4.585220 2.406910  
 H -1.102899 5.176518 1.959603  
 H -2.229047 4.663334 0.697368  
 C 1.776375 0.601963 -3.285945  
 H 1.586244 -0.124430 -4.080645

H 2.307686 1.454571 -3.730146  
H 2.425144 0.117763 -2.552289  
C -0.372489 1.805345 -3.727422  
H 0.103930 2.767135 -3.955781  
H -0.410997 1.218825 -4.653312  
H -1.395879 2.006862 -3.408650  
O -2.081113 3.445857 -1.620740  
O -4.325264 -0.758328 1.090111  
C -2.883427 4.428660 -2.250601  
H -3.564069 4.916628 -1.539443  
H -2.185985 5.169728 -2.644980  
H -3.468764 4.006043 -3.078378  
C -5.716469 -0.743143 1.366706  
H -6.313124 -0.905825 0.459855  
H -5.893463 -1.565839 2.061913  
H -6.019365 0.199160 1.839794  
Pd 0.941629 -1.643047 -0.216452  
C 1.555349 -1.112076 1.646166  
C 1.588735 0.200843 2.114191  
C 2.260355 -2.089748 2.370247  
C 2.281141 0.529182 3.288782  
H 1.090735 0.983932 1.563016  
C 2.949532 -1.765500 3.542818  
H 2.289537 -3.120225 2.025192  
C 2.959161 -0.450674 4.012398  
H 2.287204 1.562303 3.628880  
H 3.481225 -2.545329 4.084520  
H 3.493252 -0.195013 4.924161  
Cl 1.055297 -2.710377 -2.513647  
O 3.134580 -1.458418 -0.561553  
C 4.013512 -2.299357 -0.827059  
N 5.237531 -1.879159 -1.213849  
C 3.800846 -3.788290 -0.723707  
H 3.514341 -4.037398 0.302356  
H 2.966014 -4.048941 -1.382036  
H 4.690708 -4.365113 -0.993990  
C 5.559000 -0.471196 -1.402271  
H 5.197622 0.104004 -0.546942  
H 6.643682 -0.366237 -1.478616  
H 5.090625 -0.072276 -2.309031  
H 5.916592 -2.574292 -1.484420  
C -2.457074 -2.479808 -1.294362  
C -1.873321 -2.488393 1.838301  
C -1.910709 -3.922570 -1.368281  
H -2.301302 -4.389691 -2.281877  
H -0.822505 -3.953722 -1.432012  
H -2.251679 -4.530439 -0.524291  
C -3.995471 -2.571926 -1.176758  
H -4.346315 -3.046387 -0.262291  
H -4.477398 -1.597993 -1.283431  
H -4.336675 -3.187799 -2.019419  
C -2.179073 -1.733755 -2.615756  
H -2.563663 -0.709184 -2.585572  
H -1.120571 -1.726833 -2.870218  
H -2.708048 -2.260308 -3.421601  
C -0.768960 -3.558078 1.993187

H 0.219710 -3.121447 2.054710  
H -0.950572 -4.106320 2.927508  
H -0.781107 -4.284992 1.175941  
C -1.758817 -1.449821 2.970501  
H -2.590361 -0.739701 2.943560  
H -1.787715 -1.969337 3.937854  
H -0.817283 -0.896639 2.923189  
C -3.191015 -3.276483 1.997321  
H -3.188193 -3.706808 3.007750  
H -4.080077 -2.666967 1.900842  
H -3.256157 -4.115034 1.299237

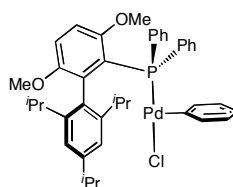

#### Complex 12a

C 3.327635 -0.693686 -1.388976  
C 4.001258 -1.108418 -0.238669  
C 3.542534 -0.632242 0.991103  
C 2.459497 0.241906 1.098261  
C 1.800743 0.681581 -0.089424  
C 2.254373 0.198501 -1.351867  
H 3.661281 -1.073909 -2.351397  
H 4.037741 -0.958327 1.900303  
C 0.948354 1.931989 -0.040394  
C -0.457599 1.976121 0.021555  
C 1.663412 3.159676 -0.074605  
C -1.127940 3.227133 0.070378  
C 0.990861 4.377117 -0.015375  
C -0.402158 4.414090 0.059992  
H 1.537355 5.312697 -0.030914  
H -0.902688 5.374094 0.100972  
P -1.417559 0.398638 0.046219  
C 1.650777 0.675827 -2.671732  
H 0.830515 1.362210 -2.439407  
C 5.221667 -2.011805 -0.348483  
H 5.203926 -2.448308 -1.356186  
C 5.213743 -3.176053 0.656937  
H 5.328795 -2.819945 1.688041  
H 4.277481 -3.737544 0.595979  
H 6.050804 -3.854309 0.451977  
C 6.517922 -1.183446 -0.225377  
H 7.399486 -1.822510 -0.358027  
H 6.557185 -0.386534 -0.976896  
H 6.588750 -0.714449 0.763875  
C 2.056936 0.744013 2.484657  
H 1.119523 1.301173 2.379542  
C 1.802426 -0.414847 3.469465  
H 1.384427 -0.029796 4.408060  
H 1.112823 -1.155017 3.050252  
H 2.729286 -0.943915 3.717508

C 3.106466 1.715346 3.062618  
 H 2.772442 2.110437 4.029921  
 H 4.063805 1.205085 3.221902  
 H 3.286150 2.556588 2.387291  
 C 1.056708 -0.484819 -3.492132  
 H 0.582250 -0.102936 -4.404315  
 H 1.828651 -1.203059 -3.790302  
 H 0.303289 -1.029055 -2.912987  
 C 2.679609 1.470035 -3.501811  
 H 3.515329 0.833502 -3.814931  
 H 2.211366 1.873796 -4.407902  
 H 3.092926 2.303605 -2.924464  
 O 3.025224 3.059469 -0.170439  
 O -2.489431 3.181971 0.107910  
 C 3.792050 4.251686 -0.214344  
 H 3.666445 4.847528 0.699639  
 H 4.832016 3.931411 -0.295096  
 H 3.532869 4.867408 -1.086067  
 C -3.216019 4.395830 0.202085  
 H -3.056103 5.029380 -0.680101  
 H -4.267125 4.108194 0.255137  
 H -2.947107 4.955983 1.106822  
 C -2.508595 0.522675 1.533529  
 C -3.857575 0.899806 1.477462  
 C -1.941913 0.216739 2.780110  
 C -4.620170 0.970224 2.644105  
 H -4.312573 1.138958 0.523131  
 C -2.701187 0.303595 3.947998  
 H -0.907184 -0.106245 2.836957  
 C -4.044179 0.677851 3.882214  
 H -4.640560 0.734509 4.788942  
 C -2.533802 0.467015 -1.418036  
 C -3.589398 -0.454710 -1.526534  
 C -2.297478 1.352575 -2.480043  
 C -4.396591 -0.471840 -2.664827  
 H -3.782308 -1.162969 -0.728154  
 C -3.100985 1.324931 -3.620527  
 H -1.487332 2.071619 -2.418421  
 C -4.155072 0.414993 -3.715407  
 H -4.781370 0.394395 -4.603278  
 Pd 0.034583 -1.413582 0.086981  
 C -1.521751 -2.684304 0.018499  
 C -2.307159 -2.953725 1.141048  
 C -1.789853 -3.331875 -1.192177  
 C -3.377990 -3.852398 1.043848  
 H -2.102681 -2.470676 2.090718  
 C -2.859845 -4.227414 -1.281407  
 H -1.163928 -3.155764 -2.060958  
 C -3.660374 -4.487096 -0.166287  
 H -3.986475 -4.053820 1.922756  
 H -3.059225 -4.728388 -2.226124  
 H -4.490164 -5.185755 -0.238022  
 H -2.902636 2.018651 -4.433370  
 H -5.209537 -1.189696 -2.730272  
 H -5.667127 1.256333 2.584293  
 H -2.244996 0.064514 4.904799

Cl 1.416143 -3.344761 0.203532

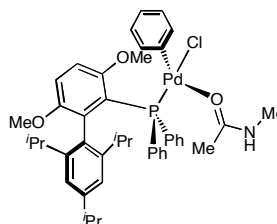

**Complex 12b**

C 4.155010 0.937469 -1.139847  
 C 4.856167 -0.266995 -1.212658  
 C 4.455202 -1.303497 -0.367039  
 C 3.387470 -1.166093 0.526952  
 C 2.675498 0.059318 0.563619  
 C 3.081370 1.134489 -0.263682  
 H 4.464792 1.755553 -1.784135  
 H 5.001035 -2.243692 -0.388370  
 C 1.593834 0.243628 1.599937  
 C 0.214218 -0.008440 1.418552  
 C 2.045045 0.650588 2.885637  
 C -0.656847 0.105187 2.541685  
 C 1.163803 0.805928 3.951495  
 C -0.189744 0.524066 3.782303  
 H 1.515967 1.126130 4.924639  
 H -0.866321 0.619528 4.623453  
 P -0.732010 -0.404435 -0.147018  
 C 2.430478 2.516167 -0.182267  
 H 1.409743 2.389857 0.192070  
 C 6.040124 -0.419697 -2.159616  
 H 6.121029 0.517923 -2.726420  
 C 5.831953 -1.554713 -3.179258  
 H 5.757539 -2.529766 -2.682667  
 H 4.913380 -1.400603 -3.755559  
 H 6.673075 -1.603463 -3.881479  
 C 7.362153 -0.606459 -1.389813  
 H 8.211240 -0.656465 -2.082530  
 H 7.535344 0.223197 -0.695668  
 H 7.353318 -1.534099 -0.804955  
 C 3.094683 -2.323818 1.486775  
 H 2.178044 -2.087565 2.036042  
 C 2.861547 -3.670725 0.776336  
 H 2.658686 -4.455150 1.515571  
 H 2.004266 -3.632923 0.097304  
 H 3.738526 -3.984853 0.198812  
 C 4.227577 -2.465932 2.525942  
 H 3.975009 -3.232842 3.268962  
 H 5.167147 -2.763912 2.044896  
 H 4.402921 -1.519977 3.045474  
 C 2.329083 3.243175 -1.535734  
 H 1.683482 4.121126 -1.429590  
 H 3.308465 3.594956 -1.883401  
 H 1.903944 2.601443 -2.311513

C 3.179764 3.420931 0.820480  
 H 4.199340 3.621406 0.467388  
 H 2.660497 4.381570 0.920974  
 H 3.255158 2.958336 1.806763  
 O 3.395320 0.863417 3.003415  
 O -1.953072 -0.254847 2.326875  
 C 3.905412 1.297754 4.252852  
 H 3.725875 0.557144 5.043935  
 H 4.980634 1.416500 4.108052  
 H 3.472452 2.260870 4.554525  
 C -2.958845 0.106420 3.266555  
 H -2.921086 1.177867 3.493562  
 H -3.904579 -0.125971 2.777299  
 H -2.860399 -0.474778 4.192876  
 C 0.286957 -0.353031 -1.687698  
 C 1.165144 -1.387507 -2.051132  
 C 0.017726 0.658838 -2.621191  
 C 1.766762 -1.400349 -3.307447  
 H 1.370118 -2.195009 -1.360347  
 C 0.622716 0.645283 -3.881017  
 H -0.668664 1.456275 -2.363610  
 C 1.497097 -0.383758 -4.227666  
 H 1.959633 -0.400972 -5.211164  
 C -1.067498 -2.224442 -0.015930  
 C -1.585745 -2.887714 -1.141009  
 C -0.869833 -2.957944 1.159975  
 C -1.890446 -4.246557 -1.092202  
 H -1.746493 -2.339995 -2.064867  
 C -1.180266 -4.320139 1.211455  
 H -0.466951 -2.473671 2.041882  
 C -1.690876 -4.969369 0.087569  
 H -1.925473 -6.029920 0.126399  
 Pd -2.788507 0.803422 -0.302626  
 C -1.918167 2.608736 -0.337991  
 C -1.315282 3.157110 0.799826  
 C -2.037097 3.407249 -1.485783  
 C -0.830757 4.471881 0.788332  
 H -1.226142 2.575522 1.711785  
 C -1.543190 4.715081 -1.499494  
 H -2.548443 3.024327 -2.364356  
 C -0.937308 5.254346 -0.361989  
 H -0.374096 4.881531 1.687026  
 H -1.652174 5.319106 -2.397754  
 H -0.566179 6.276226 -0.368627  
 H -1.012923 -4.872639 2.132475  
 H -2.283331 -4.741859 -1.976425  
 H 2.441304 -2.210655 -3.569266  
 H 0.399228 1.437969 -4.589985  
 O -3.963661 -1.133852 -0.147343  
 C -4.887559 -1.542710 -0.871371  
 N -5.683597 -2.546371 -0.439318  
 H -6.464535 -2.821977 -1.015205  
 C -5.171208 -0.981790 -2.242963  
 H -5.450949 0.070394 -2.123013  
 H -4.251426 -1.011009 -2.835545  
 H -5.959453 -1.524710 -2.774099

C -5.541697 -3.133359 0.885585  
 H -5.796075 -2.410098 1.668570  
 H -6.211578 -3.992972 0.960054  
 H -4.511073 -3.463276 1.040088  
 Cl -4.906556 1.951435 -0.350883

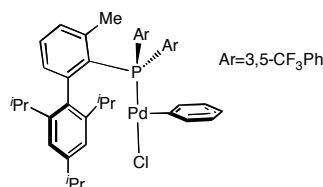

### Complex 13a

C 4.395562 -1.593606 0.452110  
 C 5.160173 -0.446995 0.676828  
 C 4.730513 0.749128 0.094647  
 C 3.586922 0.825468 -0.701521  
 C 2.827363 -0.361562 -0.941698  
 C 3.251900 -1.589625 -0.349404  
 H 4.709186 -2.526182 0.914429  
 H 5.300030 1.655949 0.272512  
 C 1.916329 -0.408591 -2.152597  
 C 0.504730 -0.277863 -2.171336  
 C 2.592718 -0.621549 -3.366657  
 C -0.201030 -0.348775 -3.405257  
 C 1.906798 -0.697231 -4.572102  
 C 0.522085 -0.560704 -4.584080  
 H 2.447576 -0.865578 -5.499313  
 H -0.017883 -0.620607 -5.525262  
 P -0.314627 -0.023079 -0.533861  
 C 2.532959 -2.909567 -0.620166  
 H 1.652886 -2.689244 -1.231417  
 C 6.443005 -0.528477 1.491937  
 H 6.414994 -1.483754 2.032846  
 C 6.572076 0.590581 2.539667  
 H 6.704531 1.572134 2.068570  
 H 5.682748 0.637348 3.174241  
 H 7.450139 0.412212 3.171568  
 C 7.672089 -0.559312 0.559073  
 H 8.594585 -0.673613 1.140762  
 H 7.613466 -1.389070 -0.154604  
 H 7.750637 0.371928 -0.015474  
 C 3.215622 2.167580 -1.333661  
 H 2.233509 2.056869 -1.807347  
 C 3.101372 3.293438 -0.285665  
 H 2.668506 4.191836 -0.740361  
 H 2.475832 2.992307 0.561904  
 H 4.081111 3.567058 0.121502  
 C 4.208168 2.565864 -2.444843  
 H 3.915670 3.522844 -2.893033  
 H 5.222045 2.679075 -2.043768  
 H 4.242925 1.815260 -3.241514  
 C 2.030529 -3.582211 0.671532  
 H 1.410731 -4.452036 0.424928

H 2.860580 -3.925035 1.299477  
 H 1.432171 -2.886089 1.269219  
 C 3.412549 -3.875972 -1.438256  
 H 4.317255 -4.153799 -0.885652  
 H 2.859988 -4.796353 -1.661391  
 H 3.723983 -3.427683 -2.388376  
 C -1.374396 1.483917 -0.705248  
 C -2.759350 1.483603 -0.907215  
 C -0.715795 2.712442 -0.577143  
 C -3.462144 2.688265 -0.989301  
 C -1.419751 3.913325 -0.667506  
 H 0.350547 2.731261 -0.378275  
 C -2.798173 3.909725 -0.873036  
 C -1.471583 -1.443570 -0.311331  
 C -2.466611 -1.398314 0.679854  
 C -1.270831 -2.641243 -1.008360  
 C -3.241505 -2.526778 0.951122  
 H -2.636752 -0.494257 1.251249  
 C -2.038755 -3.771002 -0.717710  
 H -0.519572 -2.700859 -1.787731  
 C -3.029145 -3.721115 0.260550  
 H -3.633164 -4.594443 0.475885  
 Pd 1.253626 0.157125 1.164088  
 C -0.190832 0.540424 2.516908  
 C -0.624796 1.847073 2.752110  
 C -0.725316 -0.518431 3.256375  
 C -1.620283 2.085932 3.707439  
 H -0.195909 2.686099 2.213116  
 C -1.723409 -0.272075 4.206652  
 H -0.365687 -1.532036 3.107054  
 C -2.175968 1.029411 4.430839  
 H -1.953609 3.105605 3.886095  
 H -2.144598 -1.103369 4.765571  
 H -2.949564 1.219762 5.169905  
 Cl 2.748801 0.345055 2.986429  
 C -4.268045 -2.480368 2.056528  
 C -1.735270 -5.059085 -1.438941  
 F -0.636896 -5.661008 -0.923341  
 F -1.483101 -4.844820 -2.748784  
 F -2.750917 -5.940077 -1.353393  
 F -3.728386 -2.847326 3.240856  
 F -4.778348 -1.243639 2.214363  
 F -5.294191 -3.323708 1.812387  
 H -3.346637 4.841392 -0.937395  
 H -3.303482 0.551859 -1.008203  
 C -4.960403 2.651605 -1.160995  
 C -0.655182 5.201631 -0.499479  
 F -5.586923 2.434880 0.014331  
 F -5.435773 3.809219 -1.663809  
 F -5.333204 1.656329 -1.996763  
 F -1.454970 6.282996 -0.565402  
 F 0.294645 5.337278 -1.454369  
 F -0.016550 5.232269 0.691185  
 H 3.672407 -0.732107 -3.346359  
 C -1.700028 -0.193990 -3.537228  
 H -2.252464 -0.750466 -2.776650

H -2.003281 0.856117 -3.459629  
 H -2.030095 -0.557775 -4.514471

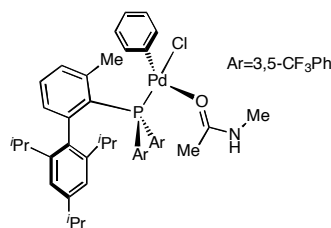

**Complex 13b**

C -4.613369 0.420378 -0.516102  
 C -5.005097 -0.882525 -0.202665  
 C -4.191534 -1.929049 -0.644878  
 C -3.023333 -1.705762 -1.382082  
 C -2.635150 -0.370699 -1.668251  
 C -3.454725 0.705900 -1.249392  
 H -5.245757 1.241730 -0.191193  
 H -4.483966 -2.952809 -0.428643  
 C -1.478579 -0.132130 -2.611226  
 C -0.114538 0.098017 -2.282698  
 C -1.838427 -0.211960 -3.969283  
 C 0.853477 0.191536 -3.331981  
 C -0.903823 -0.103326 -4.989174  
 C 0.433661 0.080479 -4.662586  
 H -1.212818 -0.174910 -6.028320  
 H 1.178725 0.147038 -5.450528  
 P 0.592128 0.341732 -0.576179  
 C -3.154907 2.154262 -1.640600  
 H -2.073980 2.252683 -1.787358  
 C -6.303737 -1.142276 0.551130  
 H -6.735065 -0.161629 0.794607  
 C -6.077811 -1.889477 1.877984  
 H -5.638364 -2.879545 1.711840  
 H -5.403375 -1.338216 2.539898  
 H -7.029592 -2.030282 2.404178  
 C -7.326051 -1.886020 -0.330998  
 H -8.279914 -2.001294 0.197584  
 H -7.515390 -1.342712 -1.263344  
 H -6.968469 -2.888569 -0.594797  
 C -2.257026 -2.917596 -1.921849  
 H -1.273258 -2.572754 -2.254393  
 C -2.026051 -4.029580 -0.879949  
 H -1.313794 -4.764331 -1.269716  
 H -1.628178 -3.643835 0.062833  
 H -2.953693 -4.563283 -0.644365  
 C -2.968225 -3.513084 -3.156063  
 H -2.408575 -4.373312 -3.542856  
 H -3.976395 -3.855641 -2.894353  
 H -3.061927 -2.779781 -3.962778  
 C -3.567230 3.187990 -0.577580  
 H -3.147697 4.164839 -0.837687  
 H -4.656766 3.303045 -0.524116



H -3.211347 2.926170 0.421336  
 C -3.832764 2.518467 -2.980179  
 H -4.922935 2.428364 -2.898090  
 H -3.596600 3.554561 -3.249877  
 H -3.500837 1.874544 -3.799225  
 C -0.652052 0.368010 0.801812  
 C -1.172790 -0.806836 1.361443  
 C -0.881489 1.584413 1.457682  
 C -1.904186 -0.763334 2.548961  
 H -0.989354 -1.763537 0.890123  
 C -1.613642 1.621561 2.647349  
 H -0.467783 2.499462 1.053075  
 C -2.125054 0.449896 3.200611  
 H -2.672506 0.477905 4.134955  
 C 1.422528 -1.280316 -0.208894  
 C 2.070307 -1.413341 1.026325  
 C 1.482156 -2.344662 -1.113568  
 C 2.769625 -2.575848 1.342571  
 H 2.041381 -0.602223 1.744176  
 C 2.169907 -3.517861 -0.785359  
 H 1.006662 -2.264804 -2.083802  
 C 2.822493 -3.639222 0.440210  
 H 3.367897 -4.542852 0.686683  
 Pd 2.160000 2.123215 -0.344273  
 C 0.856407 3.543579 -0.916134  
 C 0.426162 3.642983 -2.243388  
 C 0.483448 4.540119 -0.002989  
 C -0.368985 4.722202 -2.651620  
 H 0.709154 2.896835 -2.978801  
 C -0.321181 5.608313 -0.411436  
 H 0.841239 4.508281 1.021167  
 C -0.747322 5.706467 -1.738056  
 H -0.684535 4.789199 -3.690436  
 H -0.596088 6.374452 0.309629  
 H -1.358060 6.546873 -2.057809  
 O 3.863037 0.673666 0.125146  
 C 4.821782 0.836477 0.908266  
 N 6.060834 0.468820 0.536314  
 H 6.817696 0.595216 1.191439  
 C 4.659785 1.427414 2.286832  
 H 4.338129 2.466680 2.166053  
 H 3.879523 0.881544 2.825604  
 H 5.581269 1.395308 2.875573  
 C 6.356969 -0.040168 -0.795781  
 H 5.964510 0.643050 -1.553652  
 H 7.440146 -0.121160 -0.905535  
 H 5.906903 -1.027141 -0.947163  
 Cl 3.769636 3.877597 -0.102823  
 C -1.854896 2.942295 3.334676  
 C -2.365894 -2.050976 3.181190  
 C 3.554998 -2.623782 2.626165  
 C 2.167939 -4.681453 -1.743260  
 F 3.318955 -5.383539 -1.675395  
 F 2.004932 -4.280562 -3.020878  
 F 1.163944 -5.549202 -1.468675  
 F 3.796465 -3.885652 3.031042

F 2.919147 -1.979528 3.627726  
 F 4.760261 -2.015090 2.478088  
 F -1.355915 -2.666228 3.836555  
 F -2.825557 -2.928799 2.261741  
 F -3.354949 -1.844875 4.077823  
 F -2.081192 2.780295 4.656196  
 F -0.801841 3.774835 3.198862  
 F -2.934353 3.580303 2.826839  
 H -2.883127 -0.380965 -4.208953  
 C 2.338818 0.407594 -3.114817  
 H 2.558296 1.427347 -2.772600  
 H 2.776480 -0.265820 -2.373135  
 H 2.873622 0.252166 -4.056856

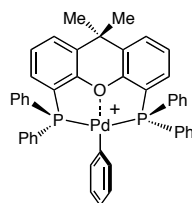

#### Complex 14

Pd 0.001365 -0.509880 -0.140352  
 P -2.328068 -0.213165 -0.036344  
 P 2.320951 -0.199273 0.006150  
 O -0.004240 1.747159 0.000676  
 C 0.020838 -2.512601 -0.249434  
 C -0.313470 -3.270291 0.878192  
 H -0.592600 -2.787631 1.810375  
 C -0.293638 -4.669020 0.806768  
 H -0.553134 -5.251998 1.687043  
 C 0.052736 -5.311073 -0.383299  
 H 0.064528 -6.396010 -0.435812  
 C 0.386572 -4.550464 -1.505211  
 H 0.662459 -5.040639 -2.435400  
 C 0.376871 -3.151795 -1.441484  
 H 0.659769 -2.579008 -2.319854  
 C -1.227291 2.426824 -0.024242  
 C -2.395340 1.635635 -0.031749  
 C -3.634718 2.287192 -0.059607  
 H -4.545752 1.698092 -0.079697  
 C -3.708581 3.676757 -0.067572  
 H -4.673010 4.174174 -0.086119  
 C -2.535534 4.424014 -0.058932  
 H -2.604251 5.507007 -0.069964  
 C -1.268212 3.823570 -0.042573  
 C -0.008889 4.693542 -0.050868  
 C 1.252504 3.827548 -0.078022  
 C 2.517698 4.430186 -0.142292  
 H 2.583100 5.512997 -0.171880  
 C 3.691900 3.685630 -0.180925  
 H 4.653394 4.184953 -0.245135  
 C 3.622640 2.295829 -0.142269  
 H 4.532470 1.705105 -0.185931  
 C 2.385757 1.644056 -0.054932

C 1.215363 2.431566 -0.039996  
 C -0.030204 5.600949 -1.310550  
 H -0.913073 6.246952 -1.313903  
 H -0.042987 5.000767 -2.225927  
 H 0.848698 6.251654 -1.341023  
 C 0.010255 5.572465 1.228883  
 H -0.872663 6.217690 1.272996  
 H 0.892806 6.219558 1.244815  
 H 0.025463 4.952522 2.131116  
 C -3.402935 -0.750633 -1.414974  
 C -2.808755 -0.984702 -2.664913  
 H -1.731585 -0.895391 -2.774225  
 C -3.594050 -1.343761 -3.760230  
 H -3.126244 -1.525403 -4.723425  
 C -4.975900 -1.481953 -3.614084  
 H -5.586321 -1.768330 -4.465597  
 C -5.572660 -1.262407 -2.370336  
 H -6.646167 -1.378206 -2.252485  
 C -4.792695 -0.898294 -1.272534  
 H -5.264052 -0.747270 -0.306141  
 C -3.149511 -0.748123 1.509781  
 C -3.286333 0.112138 2.610557  
 H -2.973031 1.148759 2.539022  
 C -3.838757 -0.356815 3.803553  
 H -3.946582 0.319428 4.646686  
 C -4.256883 -1.684187 3.911061  
 H -4.690403 -2.044953 4.839243  
 C -4.116473 -2.547688 2.821964  
 H -4.439835 -3.581679 2.899629  
 C -3.560611 -2.088192 1.628270  
 H -3.453282 -2.770739 0.790676  
 C 3.460394 -0.752702 -1.314784  
 C 3.020824 -0.657781 -2.646083  
 H 2.023771 -0.281050 -2.862530  
 C 3.858803 -1.040559 -3.691449  
 H 3.512851 -0.961237 -4.718005  
 C 5.137978 -1.533283 -3.417492  
 H 5.788442 -1.837736 -4.232242  
 C 5.576720 -1.638299 -2.097025  
 H 6.569003 -2.023431 -1.880869  
 C 4.743784 -1.249419 -1.045246  
 H 5.092571 -1.340057 -0.021532  
 C 3.056611 -0.711825 1.602323  
 C 3.078399 -2.088263 1.895109  
 H 2.681245 -2.806447 1.183791  
 C 3.605103 -2.537742 3.104777  
 H 3.623650 -3.602372 3.318905  
 C 4.097546 -1.623846 4.040474  
 H 4.502481 -1.976830 4.984472  
 C 4.063116 -0.257253 3.761918  
 H 4.440651 0.457575 4.487399  
 C 3.546719 0.201142 2.547895  
 H 3.529361 1.266537 2.344723

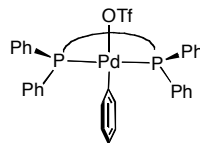

**Complex 15**

Pd -0.109445 0.625231 -0.812399  
 P -2.337809 0.204210 -0.062509  
 P 2.122764 0.909216 -0.000178  
 O 0.044572 -0.666657 1.702311  
 C -0.440699 2.582246 -1.081944  
 C -0.536988 2.958485 -2.430836  
 H -0.448765 2.213002 -3.218242  
 C -0.747040 4.297422 -2.777359  
 H -0.818842 4.574019 -3.826691  
 C -0.864301 5.271970 -1.782391  
 H -1.027987 6.312153 -2.052528  
 C -0.770127 4.898165 -0.441871  
 H -0.860213 5.646841 0.341991  
 C -0.558800 3.558867 -0.089973  
 H -0.489506 3.290100 0.959291  
 C -1.003276 -1.576250 1.738982  
 C -2.162590 -1.311360 0.981734  
 C -3.196221 -2.258051 1.021686  
 H -4.090502 -2.095712 0.430840  
 C -3.082256 -3.414395 1.787274  
 H -3.887791 -4.142572 1.792624  
 C -1.935994 -3.635259 2.547169  
 H -1.866586 -4.535144 3.147787  
 C -0.884265 -2.714508 2.548428  
 C 0.356363 -2.836273 3.438905  
 C 1.547731 -2.279871 2.652761  
 C 2.848573 -2.779587 2.758989  
 H 3.044692 -3.646334 3.379845  
 C 3.906638 -2.178202 2.081387  
 H 4.911710 -2.578831 2.174347  
 C 3.672552 -1.066143 1.279114  
 H 4.498246 -0.613871 0.741273  
 C 2.382160 -0.536764 1.128038  
 C 1.331653 -1.168553 1.824437  
 C 0.143081 -1.948077 4.699768  
 H -0.724285 -2.299737 5.270495  
 H -0.029339 -0.902455 4.425935  
 H 1.026044 -1.989588 5.348226  
 C 0.594350 -4.285150 3.898340  
 H -0.256039 -4.651415 4.480997  
 H 1.466677 -4.346852 4.555618  
 H 0.749738 -4.958539 3.048934  
 C -3.015013 1.464095 1.101900  
 C -2.988925 1.286729 2.492573  
 H -2.593055 0.370479 2.917503  
 C -3.485696 2.277025 3.343581  
 H -3.460965 2.121149 4.418852  
 C -4.019625 3.453351 2.816997

H -4.410817 4.220697 3.479688  
 C -4.048729 3.639702 1.432749  
 H -4.457481 4.554441 1.012357  
 C -3.543034 2.658521 0.581403  
 H -3.562612 2.822653 -0.491344  
 C -3.749001 -0.122309 -1.197459  
 C -5.085072 0.104352 -0.822023  
 H -5.317124 0.489963 0.165558  
 C -6.121533 -0.154255 -1.719210  
 H -7.150175 0.027342 -1.418920  
 C -5.837719 -0.642333 -2.997090  
 H -6.646685 -0.841220 -3.695135  
 C -4.514376 -0.875449 -3.373425  
 H -4.284821 -1.264663 -4.361152  
 C -3.472142 -0.614006 -2.482420  
 H -2.451299 -0.832591 -2.774800  
 C 2.464270 2.370462 1.065349  
 C 2.624829 3.630049 0.462387  
 H 2.563042 3.727547 -0.617104  
 C 2.863753 4.761614 1.240718  
 H 2.991921 5.726550 0.758058  
 C 2.925658 4.657580 2.632542  
 H 3.107910 5.541283 3.238201  
 C 2.749407 3.414496 3.241055  
 H 2.795085 3.324189 4.323108  
 C 2.522973 2.276451 2.463467  
 H 2.401949 1.313657 2.948961  
 C 3.538526 0.869970 -1.174075  
 C 4.772780 1.485438 -0.903549  
 H 4.923723 2.023482 0.027086  
 C 5.809920 1.417898 -1.834789  
 H 6.759405 1.900359 -1.617832  
 C 5.627632 0.735489 -3.040058  
 H 6.436703 0.686254 -3.764157  
 C 4.404207 0.121239 -3.312607  
 H 4.251511 -0.413911 -4.245460  
 C 3.359032 0.190400 -2.389673  
 H 2.415423 -0.296544 -2.618414  
 O 0.387401 -1.561920 -0.983785  
 S 0.220909 -2.376712 -2.252413  
 O 1.020985 -1.871739 -3.382389  
 O -1.171851 -2.757093 -2.534976  
 C 1.059668 -3.948674 -1.720339  
 F 1.006124 -4.853145 -2.705845  
 F 2.346378 -3.715688 -1.423914  
 F 0.460151 -4.461255 -0.635761

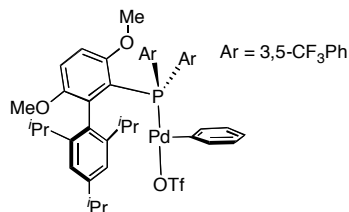

**Complex 16**

C 4.108451 -0.028704 1.062660  
 C 4.546659 -1.194068 0.434040  
 C 3.670466 -2.284109 0.394197  
 C 2.397810 -2.243872 0.964328  
 C 1.963283 -1.039293 1.599894  
 C 2.845920 0.079393 1.655965  
 H 4.773045 0.828471 1.090220  
 H 3.990819 -3.198644 -0.093735  
 C 0.764236 -1.079018 2.518756  
 C -0.550736 -0.725002 2.159730  
 C 1.008832 -1.500976 3.851599  
 C -1.600208 -0.799620 3.113105  
 C -0.032115 -1.572816 4.775353  
 C -1.332838 -1.224011 4.410939  
 H 0.154016 -1.895493 5.792780  
 H -2.121588 -1.278194 5.151536  
 P -0.898213 -0.177449 0.438658  
 C 2.495618 1.360696 2.413016  
 H 1.479159 1.249876 2.805652  
 C 5.950672 -1.269057 -0.150207  
 H 6.261305 -0.238391 -0.357520  
 C 6.018454 -2.041733 -1.477994  
 H 5.830361 -3.113208 -1.337546  
 H 5.290882 -1.653270 -2.195461  
 H 7.018282 -1.944031 -1.916101  
 C 6.933370 -1.857774 0.883721  
 H 7.954322 -1.865175 0.483692  
 H 6.935467 -1.275334 1.812029  
 H 6.663000 -2.890637 1.136492  
 C 1.545717 -3.513304 0.947155  
 H 0.524266 -3.242299 1.237379  
 C 1.473973 -4.164614 -0.448408  
 H 0.705323 -4.944971 -0.465453  
 H 1.240108 -3.429192 -1.226370  
 H 2.424207 -4.633943 -0.726067  
 C 2.053865 -4.539430 1.982104  
 H 1.402782 -5.421749 1.998142  
 H 3.067203 -4.873288 1.729573  
 H 2.085426 -4.111092 2.987614  
 C 2.509947 2.609314 1.511041  
 H 2.165144 3.483086 2.076422  
 H 3.514976 2.823954 1.132931  
 H 1.865464 2.490324 0.635037  
 C 3.423913 1.554534 3.630114  
 H 4.459976 1.722103 3.314287  
 H 3.108883 2.428889 4.211978

H 3.410109 0.677531 4.285117  
 O 2.303385 -1.819156 4.150417  
 O -2.837317 -0.422931 2.684033  
 C 2.616509 -2.222591 5.476180  
 H 2.086896 -3.143569 5.753074  
 H 3.691258 -2.409090 5.480955  
 H 2.380436 -1.433922 6.202251  
 C -3.958815 -0.627288 3.537766  
 H -3.930096 0.049535 4.400402  
 H -4.837831 -0.414392 2.928612  
 H -4.006676 -1.666097 3.885723  
 C -2.267873 -1.263214 -0.155069  
 C -3.622092 -0.925166 -0.066924  
 C -1.916263 -2.505179 -0.692589  
 C -4.601847 -1.823533 -0.493221  
 H -3.922494 0.032588 0.339570  
 C -2.899399 -3.399454 -1.119716  
 H -0.871375 -2.775119 -0.788374  
 C -4.249028 -3.065778 -1.020543  
 H -5.011763 -3.756947 -1.356891  
 C -1.609985 1.514527 0.590308  
 C -2.342632 2.075704 -0.464077  
 C -1.307543 2.310959 1.701528  
 C -2.753298 3.409291 -0.406550  
 H -2.585093 1.489077 -1.341987  
 C -1.720430 3.642484 1.751066  
 H -0.754528 1.897638 2.536967  
 C -2.442444 4.202181 0.696599  
 H -2.763296 5.235971 0.737732  
 C -6.046920 -1.431067 -0.326936  
 C -2.465361 -4.729406 -1.680306  
 C -3.477101 3.992350 -1.594543  
 C -1.323618 4.487055 2.935138  
 F -3.493130 -5.419812 -2.210001  
 F -1.530688 -4.574821 -2.643354  
 F -1.907650 -5.506622 -0.720062  
 F -6.887540 -2.322006 -0.884554  
 F -6.375226 -1.336963 0.989288  
 F -6.299040 -0.223680 -0.871648  
 F -4.102997 5.146369 -1.287622  
 F -4.403621 3.135870 -2.075141  
 F -2.619137 4.254646 -2.605844  
 F -1.373622 3.778578 4.086094  
 F -2.126489 5.560460 3.079830  
 F -0.057922 4.946224 2.812784  
 Pd 1.040552 -0.116576 -0.777857  
 C -0.039320 0.088603 -2.470235  
 C -0.271161 -1.054305 -3.238831  
 C -0.455253 1.342179 -2.919037  
 C -0.944857 -0.938567 -4.460153  
 H 0.070768 -2.032459 -2.915100  
 C -1.138554 1.444890 -4.137761  
 H -0.220020 2.240163 -2.359448  
 C -1.387757 0.307845 -4.906087  
 H -1.117629 -1.829713 -5.058630  
 H -1.463962 2.423982 -4.478812

H -1.912542 0.393157 -5.853781  
 O 2.852910 0.207274 -1.887921  
 S 3.008077 1.531419 -2.648319  
 O 2.876380 1.393076 -4.099369  
 O 2.324191 2.650229 -1.976935  
 C 4.820065 1.873720 -2.379597  
 F 5.575755 0.855687 -2.817851  
 F 5.093811 2.066005 -1.073812  
 F 5.168087 2.980154 -3.043347

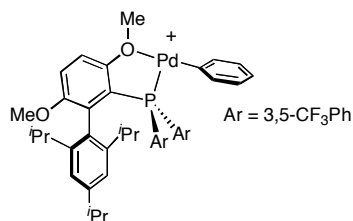

### Complex 17

C -4.187955 0.361976 0.031500  
 C -4.285815 -0.201194 1.310099  
 C -3.426903 -1.257309 1.614084  
 C -2.492946 -1.757812 0.694882  
 C -2.394253 -1.147947 -0.577952  
 C -3.283376 -0.093208 -0.929774  
 H -4.867840 1.169402 -0.227497  
 H -3.495494 -1.729363 2.587887  
 C -1.487232 -1.701864 -1.647571  
 C -0.194266 -1.208369 -1.958437  
 C -2.020650 -2.741646 -2.456276  
 C 0.485360 -1.697752 -3.106629  
 C -1.310725 -3.236041 -3.550350  
 C -0.068539 -2.704574 -3.884941  
 H -1.723322 -4.023254 -4.168924  
 H 0.444699 -3.084222 -4.758757  
 P 0.767621 -0.038336 -0.893245  
 C -3.367407 0.480535 -2.348642  
 H -2.436932 0.238934 -2.875467  
 C -5.356782 0.305462 2.271761  
 H -5.360582 1.400796 2.188640  
 C -5.103151 -0.044457 3.745113  
 H -5.191410 -1.122392 3.926254  
 H -4.112007 0.279500 4.075582  
 H -5.848023 0.449723 4.377688  
 C -6.748730 -0.198494 1.831974  
 H -7.528510 0.216081 2.480710  
 H -6.977220 0.090172 0.800486  
 H -6.802154 -1.291944 1.894054  
 C -1.691760 -2.999134 1.091083  
 H -0.906354 -3.150548 0.341892  
 C -1.006592 -2.870147 2.465237  
 H -0.364871 -3.738728 2.643860  
 H -0.386296 -1.969892 2.536189  
 H -1.738127 -2.831905 3.279149  
 C -2.582847 -4.260330 1.075884

H -1.982492 -5.151629 1.292918  
 H -3.367681 -4.190831 1.837629  
 H -3.067472 -4.392878 0.105571  
 C -3.538958 2.009016 -2.405472  
 H -3.484317 2.348797 -3.445928  
 H -4.514192 2.324645 -2.019346  
 H -2.770497 2.537878 -1.838187  
 C -4.524501 -0.186768 -3.126501  
 H -5.487805 0.066832 -2.669126  
 H -4.541817 0.166618 -4.164212  
 H -4.436902 -1.275708 -3.128767  
 O -3.249000 -3.194338 -2.102577  
 O 1.714337 -1.134785 -3.441191  
 C -3.857280 -4.228179 -2.877012  
 H -3.255558 -5.144795 -2.860463  
 H -4.820327 -4.417505 -2.402869  
 H -4.017377 -3.906301 -3.913020  
 C 2.490312 -1.722952 -4.503547  
 H 1.977911 -1.602082 -5.462105  
 H 3.432841 -1.175046 -4.520260  
 H 2.680187 -2.779970 -4.296509  
 C -0.160501 1.354216 -0.156954  
 C -0.721837 1.296861 1.127874  
 C -0.188088 2.557634 -0.870834  
 C -1.280275 2.444722 1.686148  
 H -0.730757 0.374665 1.694252  
 C -0.758180 3.698323 -0.305849  
 H 0.256174 2.617693 -1.856991  
 C -1.296432 3.648906 0.978071  
 H -1.712822 4.542684 1.430738  
 C 1.519176 -1.019899 0.457826  
 C 2.068727 -0.372758 1.573592  
 C 1.724058 -2.396750 0.295416  
 C 2.808948 -1.097180 2.508956  
 H 1.946200 0.695261 1.713249  
 C 2.447370 -3.114257 1.247593  
 H 1.327127 -2.916557 -0.568890  
 C 2.998759 -2.470251 2.356222  
 H 3.574479 -3.028252 3.085279  
 Pd 2.506078 0.578092 -2.227698  
 C 3.271525 2.021997 -1.131119  
 C 3.154886 3.335514 -1.604538  
 C 4.148503 1.706166 -0.087453  
 C 3.982860 4.326964 -1.064704  
 H 2.441611 3.601929 -2.378725  
 C 4.961519 2.710537 0.449270  
 H 4.217963 0.697238 0.307503  
 C 4.878888 4.016316 -0.039529  
 H 3.909520 5.344115 -1.439311  
 H 5.647528 2.465715 1.255214  
 H 5.503378 4.795346 0.387796  
 C 3.484177 -0.343915 3.631214  
 C 2.581555 -4.610811 1.090708  
 C -1.870188 2.425118 3.077294  
 C -0.821220 4.980333 -1.102272  
 F 0.168212 5.037496 -2.023239

F -1.990370 5.080428 -1.766850  
 F -0.711762 6.058580 -0.307584  
 F -1.291269 3.357889 3.857138  
 F -3.191327 2.699439 3.043290  
 F -1.711740 1.227423 3.675505  
 F 3.660790 -5.084290 1.734466  
 F 1.496769 -5.247347 1.585704  
 F 2.683409 -4.955741 -0.211333  
 F 4.597537 0.276597 3.171200  
 F 3.854262 -1.157021 4.632652  
 F 2.677435 0.610548 4.133836

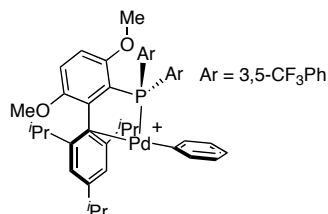

#### Complex 18

C 4.041407 -1.389256 1.088342  
 C 4.525260 -0.161167 1.566505  
 C 4.173142 1.001232 0.862546  
 C 3.353924 0.973482 -0.282388  
 C 2.811689 -0.286897 -0.705225  
 C 3.209261 -1.488599 -0.031241  
 H 4.327968 -2.297453 1.610992  
 H 4.566584 1.956358 1.193828  
 C 1.954581 -0.373841 -1.946728  
 C 0.546280 -0.262979 -1.918334  
 C 2.592997 -0.601140 -3.186570  
 C -0.207635 -0.361202 -3.114347  
 C 1.837629 -0.686061 -4.359342  
 C 0.449334 -0.566300 -4.327319  
 H 2.321737 -0.853332 -5.313964  
 H -0.109230 -0.647161 -5.252158  
 P -0.319436 0.023774 -0.323068  
 C 2.756609 -2.869327 -0.497212  
 H 2.024409 -2.728163 -1.298229  
 C 5.429571 -0.105205 2.787658  
 H 5.533888 -1.133715 3.156514  
 C 4.814373 0.736054 3.923516  
 H 4.700680 1.786490 3.630765  
 H 3.828641 0.356306 4.215569  
 H 5.462299 0.707887 4.805940  
 C 6.838927 0.402060 2.419106  
 H 7.492196 0.367077 3.297441  
 H 7.292827 -0.211316 1.633540  
 H 6.812658 1.439649 2.066289  
 C 3.137572 2.263582 -1.075563  
 H 2.246722 2.125196 -1.697881  
 C 2.909127 3.505164 -0.191632  
 H 2.528494 4.332501 -0.798976  
 H 2.187479 3.317085 0.611731  
 H 3.837545 3.848849 0.277653

C 4.332544 2.507147 -2.023873  
 H 4.149127 3.395222 -2.638592  
 H 5.251113 2.678801 -1.450682  
 H 4.501491 1.652794 -2.683533  
 C 2.069644 -3.677535 0.621079  
 H 1.630917 -4.591916 0.209055  
 H 2.777741 -3.971644 1.403437  
 H 1.264916 -3.103734 1.094589  
 C 3.941829 -3.656448 -1.095546  
 H 4.705434 -3.861370 -0.336594  
 H 3.594299 -4.618669 -1.487373  
 H 4.414350 -3.099910 -1.910057  
 C -1.424148 1.474171 -0.515101  
 C -2.781630 1.359547 -0.833050  
 C -0.864130 2.744558 -0.357523  
 C -3.555970 2.507635 -1.005287  
 C -1.646997 3.887631 -0.517475  
 H 0.183257 2.847310 -0.096725  
 C -2.997508 3.777220 -0.846282  
 C -1.379180 -1.429463 0.017623  
 C -2.284353 -1.389136 1.088224  
 C -1.233759 -2.612841 -0.715096  
 C -3.032814 -2.520633 1.412117  
 H -2.409336 -0.485869 1.674804  
 C -1.981814 -3.741741 -0.377689  
 H -0.547159 -2.662325 -1.552128  
 C -2.883881 -3.702747 0.685017  
 H -3.469343 -4.578343 0.939661  
 Pd 1.373544 0.322826 1.141345  
 C 0.133430 0.619998 2.688395  
 C -0.257999 1.909615 3.064066  
 C -0.135484 -0.477600 3.515728  
 C -0.870550 2.102832 4.308478  
 H -0.093354 2.765804 2.416027  
 C -0.751500 -0.271511 4.755763  
 H 0.126976 -1.487462 3.210815  
 C -1.117438 1.016832 5.150898  
 H -1.160888 3.105646 4.610207  
 H -0.955243 -1.122156 5.400136  
 H -1.606159 1.172730 6.108197  
 C -3.951027 -2.470004 2.611646  
 C -1.750198 -5.024146 -1.140682  
 F -0.654606 -5.668998 -0.674949  
 F -1.535398 -4.780720 -2.451160  
 F -2.790705 -5.866484 -1.035458  
 F -3.250474 -2.643429 3.754371  
 F -4.571091 -1.276805 2.700755  
 F -4.890868 -3.429707 2.560174  
 H -3.607465 4.663944 -0.969479  
 H -3.238034 0.385032 -0.959487  
 C -5.003167 2.331211 -1.399534  
 C -0.985204 5.227284 -0.308231  
 F -5.650650 1.535414 -0.526331  
 F -5.657273 3.500762 -1.469298  
 F -5.093487 1.734466 -2.615072  
 F -1.854912 6.245048 -0.384131

F -0.014891 5.436820 -1.227186  
 F -0.386171 5.275369 0.905750  
 O -1.555751 -0.264338 -2.981667  
 O 3.949923 -0.729658 -3.143878  
 C -2.372397 -0.190462 -4.154187  
 H -3.374881 0.048021 -3.798366  
 H -2.026124 0.605633 -4.822544  
 H -2.382334 -1.148077 -4.686664  
 C 4.654044 -0.973864 -4.361919  
 H 5.705652 -1.044694 -4.083175  
 H 4.333894 -1.915414 -4.823695  
 H 4.519788 -0.148759 -5.071563

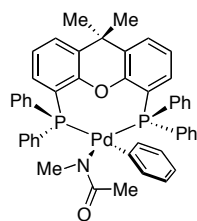

#### Complex 19

Pd 0.011557 -0.662742 0.797424  
 P -2.283214 -0.219505 0.237214  
 P 2.301384 -0.216319 0.255674  
 O 0.008250 1.346723 -1.193895  
 C 0.008584 -2.260831 -0.476703  
 C -0.008581 -3.521022 0.144564  
 H -0.021490 -3.594547 1.231176  
 C -0.009123 -4.699313 -0.611703  
 H -0.022445 -5.663618 -0.107052  
 C 0.007060 -4.637929 -2.006802  
 H 0.006567 -5.551397 -2.596685  
 C 0.023346 -3.391257 -2.635466  
 H 0.035739 -3.330162 -3.721726  
 C 0.023883 -2.216404 -1.876956  
 H 0.035956 -1.258435 -2.391118  
 C -1.174319 2.068571 -1.120142  
 C -2.287647 1.496970 -0.471652  
 C -3.453100 2.276251 -0.388062  
 H -4.324032 1.872563 0.116388  
 C -3.508100 3.559200 -0.923618  
 H -4.417902 4.145630 -0.834972  
 C -2.397425 4.086247 -1.580190  
 H -2.455758 5.082172 -2.004806  
 C -1.219187 3.345773 -1.701664  
 C 0.010211 3.814283 -2.485216  
 C 1.243663 3.337532 -1.713217  
 C 2.428922 4.068742 -1.606722  
 H 2.491001 5.062088 -2.036808  
 C 3.542264 3.535896 -0.959020  
 H 4.458293 4.114523 -0.884326  
 C 3.480304 2.258105 -0.412655  
 H 4.351811 1.849518 0.087132  
 C 2.306910 1.488325 -0.479374  
 C 1.193843 2.062116 -1.126748

C 0.001534 3.118346 -3.878335  
 H -0.889594 3.414148 -4.443862  
 H -0.001793 2.028642 -3.781277  
 H 0.889567 3.407830 -4.451974  
 C 0.014303 5.336226 -2.705126  
 H -0.864166 5.646019 -3.279014  
 H 0.888143 5.640225 -3.289117  
 H 0.021428 5.886540 -1.758220  
 C -3.055964 -1.220899 -1.108160  
 C -3.431235 -0.680845 -2.345257  
 H -3.280303 0.373839 -2.549195  
 C -4.008226 -1.491834 -3.326885  
 H -4.292469 -1.057381 -4.281827  
 C -4.221564 -2.847491 -3.082023  
 H -4.669919 -3.477053 -3.846032  
 C -3.850902 -3.394573 -1.850288  
 H -4.003544 -4.451993 -1.653423  
 C -3.268776 -2.590203 -0.873775  
 H -2.963641 -3.033283 0.069070  
 C -3.625089 -0.169468 1.512470  
 C -4.944864 -0.558867 1.223014  
 H -5.206843 -0.904970 0.229168  
 C -5.930024 -0.510028 2.210996  
 H -6.944680 -0.816891 1.970454  
 C -5.614660 -0.072493 3.498779  
 H -6.382787 -0.039524 4.267030  
 C -4.307814 0.318361 3.793957  
 H -4.042515 0.657679 4.791129  
 C -3.318300 0.270065 2.810949  
 H -2.311204 0.572262 3.065041  
 C 3.111791 -1.238773 -1.050358  
 C 3.281160 -2.612402 -0.805447  
 H 2.918248 -3.047311 0.120506  
 C 3.890691 -3.431755 -1.752745  
 H 4.008991 -4.492090 -1.548196  
 C 4.329576 -2.895930 -2.966719  
 H 4.797572 -3.537275 -3.708828  
 C 4.157764 -1.536410 -3.223166  
 H 4.493896 -1.110982 -4.165209  
 C 3.555492 -0.710424 -2.269951  
 H 3.436708 0.346588 -2.482240  
 C 3.607448 -0.112361 1.563535  
 C 4.899021 -0.635605 1.384815  
 H 5.168363 -1.123310 0.454599  
 C 5.848869 -0.535385 2.403863  
 H 6.843101 -0.947060 2.250512  
 C 5.525510 0.089221 3.609171  
 H 6.266245 0.163738 4.401041  
 C 4.244789 0.614584 3.793049  
 H 3.979239 1.098039 4.729154  
 C 3.290069 0.514361 2.781037  
 H 2.290358 0.905596 2.932497  
 N 0.021122 0.754243 2.445338  
 C -0.075143 0.270025 3.708001  
 C 0.140948 -1.233890 3.881180  
 H 0.821432 -1.654561 3.131117

H 0.539139 -1.421392 4.882605  
 H -0.820022 -1.758850 3.801123  
 C -0.184573 2.193671 2.339725  
 H -1.244950 2.482731 2.427432  
 H 0.346499 2.724245 3.140031  
 H 0.180068 2.554395 1.374347  
 O -0.345795 0.964276 4.704197

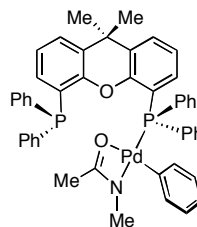

**Complex 20**

Pd 1.159051 -0.914846 -1.273764  
 P -2.160506 -0.650564 0.398652  
 P 2.061793 0.440639 0.383734  
 O -0.586674 1.840407 0.108494  
 C 1.727299 -2.632022 -0.397496  
 C 0.723530 -3.471803 0.113360  
 H -0.310165 -3.137867 0.121698  
 C 1.038200 -4.740597 0.612383  
 H 0.244769 -5.374869 1.002771  
 C 2.359509 -5.194056 0.608427  
 H 2.603489 -6.180221 0.995778  
 C 3.362243 -4.367922 0.099231  
 H 4.395757 -4.708188 0.087556  
 C 3.050073 -3.096440 -0.398701  
 H 3.852075 -2.472861 -0.781885  
 C -1.825062 2.008686 -0.485785  
 C -2.690606 0.900319 -0.470011  
 C -3.927004 1.037582 -1.115343  
 H -4.610923 0.195540 -1.135917  
 C -4.286552 2.234091 -1.732634  
 H -5.244535 2.320208 -2.237942  
 C -3.428241 3.330035 -1.675922  
 H -3.739802 4.265039 -2.128477  
 C -2.186606 3.246205 -1.035436  
 C -1.280197 4.459180 -0.803252  
 C 0.170856 3.977101 -0.722896  
 C 1.262994 4.797069 -1.026334  
 H 1.094092 5.800563 -1.401038  
 C 2.571236 4.358046 -0.842480  
 H 3.404355 5.016140 -1.071527  
 C 2.811081 3.072406 -0.365153  
 H 3.832353 2.735748 -0.234486  
 C 1.750152 2.204779 -0.070326  
 C 0.437237 2.686236 -0.245483  
 C -1.463448 5.527987 -1.898250  
 H -2.496184 5.887027 -1.923004  
 H -1.207063 5.137224 -2.888303  
 H -0.840728 6.404822 -1.699111  
 C -1.659061 5.085847 0.570673

H -2.702405 5.422209 0.562729  
 H -1.015944 5.946740 0.788946  
 H -1.543144 4.359203 1.381388  
 C -3.361280 -1.885173 -0.294556  
 C -2.986877 -2.528706 -1.488244  
 H -2.043048 -2.270000 -1.963479  
 C -3.811626 -3.495946 -2.063801  
 H -3.508116 -3.982203 -2.987636  
 C -5.014964 -3.850286 -1.448858  
 H -5.652430 -4.610912 -1.892361  
 C -5.390415 -3.227517 -0.257511  
 H -6.323747 -3.499943 0.229240  
 C -4.571681 -2.250559 0.314927  
 H -4.876621 -1.772362 1.240655  
 C -2.841923 -0.371632 2.103116  
 C -3.745372 0.644994 2.450333  
 H -4.099732 1.335133 1.690956  
 C -4.198157 0.778311 3.765161  
 H -4.897404 1.572530 4.015370  
 C -3.761784 -0.106048 4.753144  
 H -4.117573 -0.002930 5.775114  
 C -2.860024 -1.119788 4.421760  
 H -2.508460 -1.808753 5.185576  
 C -2.397623 -1.243806 3.111518  
 H -1.676887 -2.020183 2.868183  
 C 3.906095 0.351408 0.434692  
 C 4.590517 0.106988 -0.767917  
 H 4.022535 -0.047894 -1.682461  
 C 5.984321 0.056483 -0.793202  
 H 6.499825 -0.132468 -1.730991  
 C 6.712435 0.235919 0.385759  
 H 7.797989 0.187619 0.368765  
 C 6.040702 0.472598 1.586003  
 H 6.601298 0.610378 2.506807  
 C 4.645388 0.534042 1.611820  
 H 4.134318 0.721756 2.550542  
 C 1.579045 0.287157 2.152936  
 C 1.559291 -0.987785 2.742352  
 H 1.767091 -1.866795 2.141585  
 C 1.268174 -1.128895 4.099346  
 H 1.261507 -2.120274 4.544635  
 C 0.980143 -0.006580 4.879234  
 H 0.747206 -0.120272 5.934630  
 C 0.988138 1.261495 4.297410  
 H 0.760096 2.139094 4.896419  
 C 1.290160 1.409747 2.942301  
 H 1.304384 2.401367 2.501404  
 O 0.297149 0.490231 -2.832499  
 C 0.070879 -0.533158 -3.571692  
 N 0.331269 -1.714791 -3.041384  
 C -0.459689 -0.339038 -4.976100  
 H -1.349664 -0.953462 -5.154631  
 H -0.712241 0.713027 -5.121250  
 H 0.294179 -0.630148 -5.718219  
 C 0.295122 -2.970576 -3.754995  
 H 0.276801 -3.790474 -3.031388

H -0.595993 -3.061521 -4.394472  
 H 1.180617 -3.114798 -4.394143

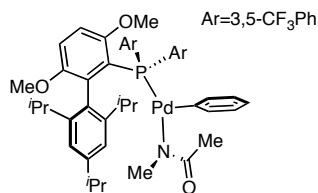

### Complex 21

C -4.286693 1.400502 0.328040  
 C -4.971125 0.195656 0.511111  
 C -4.456365 -0.943382 -0.115044  
 C -3.308901 -0.906907 -0.914536  
 C -2.643505 0.337549 -1.106909  
 C -3.153452 1.509279 -0.483907  
 H -4.677088 2.296471 0.805300  
 H -4.972117 -1.890815 0.009253  
 C -1.621887 0.477653 -2.211493  
 C -0.222656 0.393538 -2.054137  
 C -2.141781 0.741734 -3.506454  
 C 0.630660 0.568692 -3.177188  
 C -1.290384 0.897852 -4.597844  
 C 0.092246 0.812894 -4.436637  
 H -1.688069 1.095549 -5.586129  
 H 0.734013 0.952740 -5.298118  
 P 0.498037 0.037989 -0.391229  
 C -2.572789 2.897112 -0.761745  
 H -1.705919 2.771700 -1.418545  
 C -6.287231 0.174191 1.280200  
 H -6.327500 1.101372 1.867869  
 C -6.425646 -0.997677 2.266226  
 H -6.407388 -1.965708 1.749767  
 H -5.632273 -0.985246 3.019574  
 H -7.389306 -0.928646 2.785196  
 C -7.469678 0.206114 0.287455  
 H -8.422914 0.263653 0.826420  
 H -7.404990 1.067482 -0.387446  
 H -7.486232 -0.701172 -0.329244  
 C -2.865265 -2.180652 -1.636585  
 H -1.883236 -1.986334 -2.082596  
 C -2.708228 -3.388872 -0.693887  
 H -2.240763 -4.225513 -1.225663  
 H -2.090892 -3.144325 0.176843  
 H -3.675671 -3.737042 -0.314965  
 C -3.829445 -2.532907 -2.788698  
 H -3.464658 -3.408527 -3.339078  
 H -4.826390 -2.772394 -2.400237  
 H -3.935493 -1.699285 -3.488125  
 C -2.080029 3.616560 0.506870  
 H -1.608529 4.569668 0.241513  
 H -2.903570 3.827695 1.198295  
 H -1.341576 3.015127 1.046215  
 C -3.585811 3.776656 -1.524048  
 H -4.466113 3.992121 -0.907476



H -3.128667 4.734753 -1.799274  
 H -3.929468 3.279842 -2.436573  
 O -3.502978 0.835422 -3.598622  
 O 1.971354 0.502716 -2.938899  
 C -4.081006 1.102260 -4.868067  
 H -3.850800 0.308224 -5.590539  
 H -5.158391 1.135886 -4.699981  
 H -3.745137 2.067459 -5.269244  
 C 2.872266 0.499068 -4.040989  
 H 2.903222 1.478905 -4.533357  
 H 3.851845 0.264101 -3.623099  
 H 2.600224 -0.271346 -4.772495  
 C 1.649189 -1.381719 -0.681149  
 C 3.023772 -1.257173 -0.903679  
 C 1.085812 -2.661281 -0.662648  
 C 3.810305 -2.390332 -1.119598  
 H 3.488048 -0.278496 -0.917690  
 C 1.876049 -3.792688 -0.874045  
 H 0.025482 -2.780827 -0.466723  
 C 3.244192 -3.665672 -1.106761  
 H 3.859423 -4.542551 -1.265427  
 C 1.578074 1.487642 -0.018844  
 C 2.527754 1.409735 1.011247  
 C 1.380228 2.715616 -0.660257  
 C 3.261153 2.538762 1.380923  
 H 2.696903 0.477379 1.535835  
 C 2.110857 3.842524 -0.278837  
 H 0.661768 2.800449 -1.467194  
 C 3.055964 3.762061 0.742466  
 H 3.630789 4.634241 1.029815  
 C 5.275611 -2.194049 -1.407147  
 C 1.213375 -5.143890 -0.812666  
 C 4.232708 2.447200 2.531128  
 C 1.825913 5.160610 -0.951040  
 F 2.085583 -6.151992 -1.004962  
 F 0.617331 -5.339807 0.386164  
 F 0.243661 -5.259907 -1.750715  
 F 5.948740 -3.358499 -1.465345  
 F 5.457613 -1.565515 -2.599405  
 F 5.865547 -1.419959 -0.473349  
 F 5.208028 3.376011 2.434217  
 F 4.821639 1.236579 2.593033  
 F 3.609785 2.649594 3.715286  
 F 1.586356 5.002782 -2.271998  
 F 2.850574 6.027070 -0.820655  
 F 0.730082 5.757351 -0.424642  
 Pd -1.067671 -0.427431 1.304912  
 C 0.356343 -0.885037 2.656838  
 C 0.835866 -2.195283 2.759986  
 C 0.863426 0.101919 3.509773  
 C 1.829127 -2.508240 3.696109  
 H 0.449742 -2.985154 2.122287  
 C 1.860158 -0.215683 4.440613  
 H 0.492174 1.120768 3.459057  
 C 2.346454 -1.520593 4.535505  
 H 2.193610 -3.530616 3.765044

H 2.255069 0.565183 5.085171  
 H 3.118151 -1.766189 5.260051  
 N -2.428624 -0.913529 2.757297  
 C -2.978008 -0.055940 3.658551  
 C -2.504231 1.391053 3.645867  
 H -2.009927 1.604421 4.600531  
 H -1.813611 1.614971 2.828928  
 H -3.373470 2.052980 3.574189  
 O -3.845013 -0.393147 4.480161  
 C -2.759002 -2.323467 2.944825  
 H -3.077468 -2.503043 3.976230  
 H -3.573763 -2.640004 2.279053  
 H -1.884017 -2.944457 2.725051

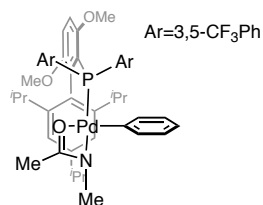

#### Complex 22

C -3.998169 -1.808825 -0.088467  
 C -4.748348 -0.715698 -0.524978  
 C -4.477691 0.532810 0.044357  
 C -3.466799 0.716080 0.993881  
 C -2.676753 -0.399024 1.367377  
 C -2.976283 -1.687096 0.860328  
 H -4.222402 -2.790653 -0.496519  
 H -5.079624 1.389762 -0.248009  
 C -1.582621 -0.237174 2.388842  
 C -0.215448 -0.072586 2.066984  
 C -1.961592 -0.271370 3.756285  
 C 0.740424 0.027758 3.120663  
 C -1.014293 -0.141093 4.767463  
 C 0.334833 0.004154 4.450929  
 H -1.306488 -0.163987 5.810494  
 H 1.060823 0.079480 5.251341  
 P 0.425727 0.036585 0.317334  
 C -2.307553 -2.951083 1.405115  
 H -1.355761 -2.657028 1.860289  
 C -5.837283 -0.896553 -1.574521  
 H -5.876049 -1.968151 -1.813651  
 C -5.498099 -0.148291 -2.878066  
 H -5.479286 0.936842 -2.718335  
 H -4.515022 -0.447698 -3.257474  
 H -6.247540 -0.356610 -3.651622  
 C -7.227325 -0.492429 -1.048091  
 H -7.998147 -0.689276 -1.803020  
 H -7.486115 -1.051210 -0.141853  
 H -7.267813 0.575961 -0.804527  
 C -3.317595 2.086561 1.661048  
 H -2.415166 2.063356 2.281973  
 C -3.157695 3.251941 0.669484  
 H -2.951314 4.182831 1.210551

H -2.344922 3.081502 -0.040135  
 H -4.070349 3.409418 0.082244  
 C -4.512692 2.363296 2.598958  
 H -4.364541 3.306152 3.140182  
 H -5.443881 2.450735 2.026138  
 H -4.639195 1.557828 3.326486  
 C -1.992690 -4.020946 0.344454  
 H -1.349580 -4.791153 0.786860  
 H -2.905450 -4.522674 -0.001175  
 H -1.484198 -3.599767 -0.526435  
 C -3.176649 -3.563725 2.526360  
 H -4.136150 -3.906633 2.119921  
 H -2.671613 -4.429966 2.971517  
 H -3.390031 -2.837228 3.315054  
 O -3.296629 -0.444472 4.002176  
 O 2.050745 0.116778 2.755518  
 C -3.733469 -0.512927 5.350795  
 H -3.523377 0.419357 5.891628  
 H -4.812665 -0.666812 5.304238  
 H -3.269778 -1.354435 5.882147  
 C 3.036171 0.404781 3.739376  
 H 3.180357 -0.443472 4.420268  
 H 3.957740 0.594936 3.187119  
 H 2.770995 1.298489 4.317377  
 C 1.514258 1.532670 0.411117  
 C 2.906002 1.486266 0.315329  
 C 0.887821 2.776910 0.559379  
 C 3.660579 2.659542 0.398826  
 H 3.416546 0.536379 0.205135  
 C 1.645053 3.945670 0.638674  
 H -0.192620 2.842157 0.615859  
 C 3.038109 3.895041 0.563019  
 H 3.625963 4.802280 0.635000  
 C 1.564028 -1.416012 0.154658  
 C 2.288442 -1.556231 -1.038244  
 C 1.616016 -2.449355 1.093453  
 C 3.066703 -2.689685 -1.269098  
 H 2.234405 -0.786972 -1.802049  
 C 2.376751 -3.595337 0.845931  
 H 1.063761 -2.375187 2.022646  
 C 3.110253 -3.721734 -0.331074  
 H 3.706144 -4.607129 -0.515320  
 Pd -0.675428 -0.168261 -1.782671  
 C -0.758509 1.764542 -2.301206  
 C -2.009749 2.351667 -2.537025  
 C 0.396515 2.480346 -2.645377  
 C -2.100705 3.638450 -3.081365  
 H -2.919084 1.808341 -2.296821  
 C 0.302793 3.765389 -3.192697  
 H 1.380862 2.045073 -2.495729  
 C -0.945489 4.350918 -3.408314  
 H -1.017296 5.350223 -3.829557  
 O -0.678819 -2.424263 -2.200712  
 C -1.050750 -2.138586 -3.394164  
 N -1.268952 -0.862416 -3.651647  
 C -1.202179 -3.239155 -4.420078

H -0.435963 -3.147371 -5.199588  
 H -1.090774 -4.206043 -3.925806  
 H -2.180077 -3.194143 -4.912871  
 C -1.564050 -0.311895 -4.955683  
 H -2.301336 -0.920176 -5.498706  
 H -1.977055 0.692407 -4.834696  
 H -0.664147 -0.227934 -5.583895  
 C 3.796050 -2.820386 -2.581158  
 C 2.351561 -4.705115 1.863621  
 F 4.808879 -3.709989 -2.507357  
 F 2.972109 -3.235523 -3.568542  
 F 4.317371 -1.637653 -2.976582  
 F 1.150694 -5.328427 1.887331  
 F 3.286315 -5.645389 1.618890  
 F 2.565279 -4.232139 3.114077  
 H 1.210766 4.305700 -3.450458  
 H -3.080140 4.081447 -3.248738  
 C 5.161083 2.544019 0.397365  
 C 0.954624 5.281869 0.736468  
 F 5.597533 1.724035 -0.581633  
 F 5.769287 3.735722 0.239767  
 F 5.609483 2.019197 1.569088  
 F 0.724856 5.811743 -0.483596  
 F 1.702660 6.176987 1.421381  
 F -0.238339 5.186393 1.362224

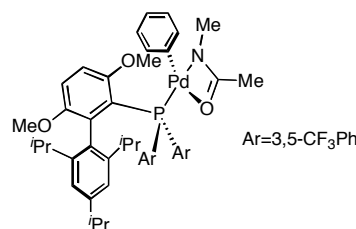

### Complex 23

C 4.174854 -1.333488 0.154466  
 C 4.818761 -0.141335 0.491031  
 C 4.329538 1.040732 -0.069967  
 C 3.243079 1.056148 -0.951420  
 C 2.596917 -0.167514 -1.264630  
 C 3.081989 -1.381587 -0.719276  
 H 4.552340 -2.260876 0.575804  
 H 4.822495 1.980125 0.164462  
 C 1.498848 -0.174431 -2.299613  
 C 0.113243 -0.083105 -2.039066  
 C 1.924867 -0.226746 -3.655787  
 C -0.797220 -0.002219 -3.133080  
 C 1.013367 -0.180011 -4.706581  
 C -0.350642 -0.059250 -4.447425  
 H 1.349184 -0.220826 -5.735694  
 H -1.048348 -0.000877 -5.274099  
 P -0.801506 -0.143248 -0.419612  
 C 2.501155 -2.741265 -1.113877  
 H 1.454064 -2.595856 -1.400190

C 6.041149 -0.149269 1.400653  
H 6.207484 -1.191608 1.705589  
C 5.828340 0.677819 2.681294  
H 5.636429 1.732128 2.452114  
H 4.976612 0.308197 3.259783  
H 6.718407 0.631405 3.320437  
C 7.304525 0.315339 0.649475  
H 8.187967 0.235589 1.294383  
H 7.478859 -0.290924 -0.246265  
H 7.217016 1.361688 0.333114  
C 2.864682 2.387080 -1.610280  
H 1.923816 2.243570 -2.151503  
C 2.648645 3.542836 -0.615116  
H 2.315414 4.438997 -1.149077  
H 1.889239 3.311377 0.137208  
H 3.570609 3.797211 -0.080842  
C 3.927263 2.798270 -2.652827  
H 3.614967 3.707997 -3.180207  
H 4.888726 3.005933 -2.167908  
H 4.086625 2.004089 -3.386332  
C 2.522466 -3.787435 0.014933  
H 1.922785 -4.654225 -0.280761  
H 3.539325 -4.146741 0.215376  
H 2.116982 -3.403097 0.953404  
C 3.235721 -3.322376 -2.342520  
H 4.284514 -3.530680 -2.096392  
H 2.765428 -4.264176 -2.649379  
H 3.224906 -2.633270 -3.189210  
O 3.277972 -0.312779 -3.851062  
O -2.108004 0.156792 -2.794565  
C 3.768672 -0.403627 -5.179333  
H 3.517940 0.490129 -5.766057  
H 4.853225 -0.481705 -5.087987  
H 3.382918 -1.294774 -5.691845  
C -3.107170 0.171335 -3.805314  
H -3.099534 -0.759758 -4.385130  
H -4.054440 0.263838 -3.273471  
H -2.975460 1.027377 -4.479069  
C 0.280217 -0.317933 1.074117  
C 0.963721 0.763285 1.644610  
C 0.201602 -1.518280 1.791191  
C 1.557274 0.642799 2.901436  
H 1.015637 1.710877 1.124918  
C 0.793743 -1.632779 3.051527  
H -0.347267 -2.354429 1.375858  
C 1.471187 -0.553396 3.614591  
H 1.911156 -0.635175 4.601133  
C -1.416275 1.590852 -0.185918  
C -2.287299 1.842098 0.885301  
C -1.067119 2.642252 -1.037117  
C -2.778967 3.127929 1.103766  
H -2.618724 1.032125 1.523638  
C -1.571355 3.927726 -0.817342  
H -0.416353 2.467689 -1.885725  
C -2.424730 4.178130 0.254710  
H -2.826204 5.172200 0.415748

Pd -2.649952 -1.589254 -0.280948  
C -1.657752 -3.262160 -0.786347  
C -1.223769 -3.497882 -2.098574  
C -1.569923 -4.311082 0.144565  
C -0.723910 -4.751074 -2.473779  
H -1.277309 -2.709711 -2.844011  
C -1.062418 -5.560849 -0.229348  
H -1.905274 -4.164964 1.168624  
C -0.640890 -5.787287 -1.541328  
H -0.402096 -4.914683 -3.500138  
H -1.002874 -6.357763 0.508623  
H -0.254943 -6.760364 -1.834105  
N -4.528836 -2.457841 0.055610  
C -5.121995 -1.316904 0.336260  
C -6.589470 -1.191375 0.676249  
H -7.212945 -1.499368 -0.172173  
H -6.852872 -1.834472 1.524316  
H -6.814772 -0.153583 0.928904  
O -4.380044 -0.265321 0.305023  
C -5.182362 -3.745187 0.000737  
H -5.806658 -3.932162 0.887284  
H -5.821210 -3.850962 -0.890014  
H -4.420551 -4.527625 -0.044468  
C -1.146340 5.058263 -1.716958  
C -3.669998 3.412049 2.286741  
C 0.697608 -2.937907 3.799050  
C 2.211084 1.848412 3.526238  
F -0.498982 -3.534780 3.605902  
F 1.644878 -3.817112 3.396689  
F 0.859301 -2.767501 5.128270  
F 1.294442 2.685690 4.059501  
F 3.059051 1.502176 4.520222  
F 2.914619 2.563793 2.620513  
F -0.017719 5.657582 -1.265436  
F -0.885500 4.630459 -2.972077  
F -2.091500 6.017818 -1.799262  
F -4.627272 4.315164 1.976806  
F -2.960424 3.932909 3.315577  
F -4.281325 2.304717 2.744848

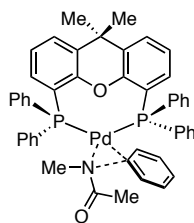

#### Transition State 8-TS

Pd 0.731396 -0.992934 -0.427612  
P -1.844342 -1.166540 0.097047  
P 1.412712 1.253783 0.171378  
O -1.555076 1.704547 -0.153035  
C 2.425400 -2.044012 0.016773  
C 1.926926 -3.323918 0.339182  
H 1.072352 -3.723615 -0.198237

C 2.552753 -4.090641 1.328404  
H 2.144550 -5.068124 1.577363  
C 3.706491 -3.627359 1.964183  
H 4.199342 -4.231156 2.721474  
C 4.236565 -2.388905 1.589348  
H 5.145689 -2.020800 2.060986  
C 3.616684 -1.603576 0.613196  
H 4.059089 -0.657225 0.330410  
C -2.747311 1.329553 -0.744985  
C -3.083022 -0.028351 -0.659917  
C -4.286904 -0.433742 -1.252065  
H -4.578255 -1.477656 -1.211573  
C -5.099465 0.490764 -1.908396  
H -6.026544 0.162565 -2.369951  
C -4.729537 1.834682 -1.976662  
H -5.376612 2.536141 -2.492424  
C -3.543060 2.283651 -1.385988  
C -3.081681 3.743419 -1.339109  
C -1.549844 3.740685 -1.426804  
C -0.797934 4.734156 -2.060379  
H -1.298265 5.539983 -2.586364  
C 0.594959 4.710052 -2.016019  
H 1.166976 5.492349 -2.506790  
C 1.259882 3.690202 -1.338102  
H 2.342409 3.693252 -1.310666  
C 0.550859 2.656372 -0.704562  
C -0.850701 2.714427 -0.774534  
C -3.723939 4.585695 -2.454363  
H -4.813866 4.587549 -2.357344  
H -3.465728 4.207909 -3.449372  
H -3.404257 5.629973 -2.386619  
C -3.492323 4.345019 0.036427  
H -4.583019 4.332174 0.145961  
H -3.146342 5.382123 0.116950  
H -3.059161 3.775092 0.864089  
C -2.607879 -2.828155 -0.191249  
C -2.160007 -3.582771 -1.288686  
H -1.356289 -3.201162 -1.912790  
C -2.723734 -4.833363 -1.555400  
H -2.368054 -5.410136 -2.405472  
C -3.726778 -5.347512 -0.732268  
H -4.157701 -6.323780 -0.939772  
C -4.169822 -4.606209 0.365875  
H -4.946529 -5.002526 1.015131  
C -3.615078 -3.354350 0.635336  
H -3.964311 -2.788299 1.493631  
C -2.102125 -0.940214 1.914878  
C -3.133590 -0.167785 2.467011  
H -3.833169 0.348653 1.816667  
C -3.275867 -0.059383 3.852854  
H -4.079621 0.545874 4.264577  
C -2.396295 -0.728546 4.704230  
H -2.510483 -0.646621 5.781977  
C -1.365508 -1.501267 4.163628  
H -0.673256 -2.023552 4.818896  
C -1.213330 -1.599405 2.781043

H -0.398171 -2.191218 2.371140  
C 3.168664 1.648288 -0.264839  
C 3.656197 1.172239 -1.494153  
H 3.029604 0.531999 -2.109166  
C 4.957671 1.469939 -1.899119  
H 5.322908 1.093879 -2.851049  
C 5.794274 2.230100 -1.077392  
H 6.810812 2.453538 -1.390580  
C 5.322721 2.691678 0.152571  
H 5.970120 3.276430 0.801050  
C 4.015746 2.406298 0.556446  
H 3.658020 2.776197 1.512008  
C 1.300772 1.754077 1.948809  
C 1.629985 0.794946 2.920471  
H 1.913098 -0.207506 2.612684  
C 1.599869 1.121880 4.276203  
H 1.861898 0.369967 5.015723  
C 1.223183 2.403887 4.682219  
H 1.191017 2.654616 5.739310  
C 0.883120 3.360510 3.724492  
H 0.585633 4.359737 4.032297  
C 0.926130 3.040356 2.365812  
H 0.668871 3.796199 1.630310  
O 0.541820 -2.296580 -2.240410  
C 1.682772 -2.470011 -2.805739  
N 2.801446 -2.106265 -2.239126  
C 1.657664 -3.147622 -4.172150  
H 0.635601 -3.185893 -4.552725  
H 2.293945 -2.619959 -4.891588  
H 2.041711 -4.172709 -4.090037  
C 4.094716 -2.441414 -2.788597  
H 4.348586 -1.842704 -3.679963  
H 4.854951 -2.228069 -2.027488  
H 4.198997 -3.503241 -3.064927

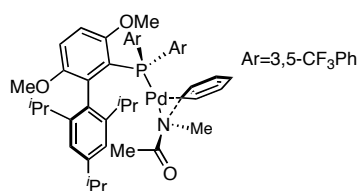

#### Transition State 9-TS

C -4.312389 1.165960 0.589599  
C -4.939174 -0.081367 0.560304  
C -4.435580 -1.037381 -0.327913  
C -3.358633 -0.773136 -1.181366  
C -2.749878 0.508959 -1.144432  
C -3.239171 1.491068 -0.249265  
H -4.694280 1.923930 1.270137  
H -4.906949 -2.015429 -0.373892  
C -1.740448 0.895035 -2.199259  
C -0.336226 0.826779 -2.053154  
C -2.274891 1.385677 -3.419213

C 0.501282 1.256562 -3.117750  
C -1.435522 1.778367 -4.458942  
C -0.050494 1.716588 -4.309902  
H -1.842946 2.148347 -5.392238  
H 0.583061 2.046961 -5.124253  
P 0.399000 0.167778 -0.484706  
C -2.688566 2.916125 -0.219927  
H -1.830262 2.958593 -0.897555  
C -6.174638 -0.347028 1.412685  
H -6.283444 0.508130 2.093920  
C -6.062939 -1.613872 2.279369  
H -5.949060 -2.513369 1.661579  
H -5.215559 -1.564391 2.970106  
H -6.974431 -1.742789 2.875396  
C -7.439243 -0.394417 0.530214  
H -8.336829 -0.516040 1.148351  
H -7.549931 0.523703 -0.057741  
H -7.398532 -1.237299 -0.170513  
C -2.921456 -1.850721 -2.175114  
H -1.998343 -1.509551 -2.656254  
C -2.607169 -3.194806 -1.491568  
H -2.147118 -3.891102 -2.202702  
H -1.918249 -3.051678 -0.651660  
H -3.511457 -3.672313 -1.096780  
C -3.972571 -2.045658 -3.287014  
H -3.619041 -2.773593 -4.027473  
H -4.915471 -2.421490 -2.871989  
H -4.184673 -1.102281 -3.798291  
C -2.184852 3.333883 1.174421  
H -1.696388 4.313617 1.122561  
H -3.006237 3.405638 1.896630  
H -1.458647 2.613260 1.565511  
C -3.728735 3.922304 -0.753056  
H -4.608572 3.965812 -0.100358  
H -3.298810 4.930020 -0.802884  
H -4.069110 3.639139 -1.754357  
O -3.640286 1.447699 -3.492530  
O 1.845441 1.215417 -2.890066  
C -4.232948 1.955954 -4.677839  
H -3.986539 1.337689 -5.551288  
H -5.310070 1.923610 -4.506679  
H -3.926614 2.992843 -4.869461  
C 2.740368 1.463286 -3.967944  
H 2.718770 2.518009 -4.269602  
H 3.732728 1.205573 -3.595598  
H 2.505935 0.830065 -4.832313  
C 1.720196 -1.019959 -1.016193  
C 3.074304 -0.693368 -1.139595  
C 1.328189 -2.343617 -1.240460  
C 4.007217 -1.665364 -1.505273  
H 3.407936 0.321545 -0.959772  
C 2.264470 -3.315740 -1.598549  
H 0.286906 -2.623052 -1.119615  
C 3.610966 -2.983384 -1.736858  
H 4.338963 -3.736929 -2.010768  
C 1.329696 1.593259 0.236826

C 2.080447 1.368438 1.400076  
C 1.204295 2.904114 -0.237670  
C 2.685281 2.432864 2.070930  
H 2.177576 0.365051 1.802077  
C 1.802782 3.965600 0.444625  
H 0.637660 3.107491 -1.138417  
C 2.546691 3.739258 1.602515  
H 3.012086 4.563988 2.128294  
C 5.438838 -1.244554 -1.703050  
C 1.798094 -4.738511 -1.754115  
C 3.432796 2.147626 3.348420  
C 1.573771 5.372242 -0.042291  
F 2.732533 -5.523636 -2.326273  
F 1.491046 -5.289016 -0.553536  
F 0.679129 -4.814930 -2.510390  
F 6.274411 -2.295885 -1.807405  
F 5.578993 -0.510774 -2.840575  
F 5.875702 -0.466491 -0.691176  
F 4.138001 3.215162 3.774562  
F 4.292337 1.117545 3.203466  
F 2.580844 1.806047 4.347164  
F 1.512435 5.431127 -1.391176  
F 2.547929 6.213452 0.360550  
F 0.402590 5.871238 0.423558  
Pd -0.970721 -0.848265 1.096529  
C 0.143252 -1.871544 2.570812  
C 0.673212 -3.104560 2.145307  
C 0.856794 -1.126214 3.530104  
C 1.904521 -3.550283 2.631531  
H 0.156090 -3.709879 1.410630  
C 2.085197 -1.588315 4.007704  
H 0.483202 -0.176438 3.890350  
C 2.620293 -2.801344 3.566169  
H 2.301490 -4.490813 2.257044  
H 2.627116 -0.976944 4.724381  
H 3.574046 -3.155185 3.946402  
N -1.787267 -1.891675 2.737351  
C -2.370624 -1.200518 3.789096  
C -2.039524 0.270958 3.975810  
H -1.574581 0.415763 4.957358  
H -1.397442 0.682499 3.193670  
H -2.983360 0.825025 3.978235  
O -3.182964 -1.743095 4.537201  
C -2.253329 -3.275607 2.603229  
H -1.830667 -3.921344 3.383117  
H -3.341010 -3.297846 2.693396  
H -1.974697 -3.663853 1.624142

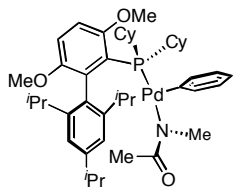

### Complex 24

C -3.447451 0.299917 1.210542  
 C -4.089998 -0.117297 0.043881  
 C -3.453664 0.147141 -1.172477  
 C -2.230094 0.818271 -1.248965  
 C -1.591561 1.243944 -0.046620  
 C -2.231693 0.992445 1.201067  
 H -3.940078 0.118566 2.162656  
 H -3.939335 -0.153652 -2.096683  
 C -0.490111 2.282614 -0.113435  
 C 0.899546 2.045243 -0.030703  
 C -0.950425 3.623288 -0.246677  
 C 1.787396 3.154699 -0.046379  
 C -0.057940 4.688312 -0.278553  
 C 1.312663 4.455093 -0.172231  
 H -0.409906 5.708090 -0.377791  
 H 1.991256 5.299023 -0.190328  
 P 1.562607 0.304912 0.102297  
 C -1.723799 1.582673 2.518277  
 H -0.718688 1.977936 2.346836  
 C -5.482829 -0.732586 0.112357  
 H -5.680851 -0.953366 1.170044  
 C -5.619805 -2.054166 -0.663058  
 H -5.435435 -1.911351 -1.735408  
 H -4.926479 -2.813835 -0.288847  
 H -6.641795 -2.439216 -0.558678  
 C -6.539042 0.294142 -0.348786  
 H -7.549607 -0.114779 -0.229582  
 H -6.474976 1.223716 0.228716  
 H -6.403876 0.548028 -1.407418  
 C -1.674315 1.170861 -2.629857  
 H -0.717253 1.681178 -2.482909  
 C -1.405574 -0.071254 -3.499262  
 H -0.949677 0.223958 -4.452616  
 H -0.733219 -0.772025 -2.993958  
 H -2.330914 -0.611139 -3.728284  
 C -2.602956 2.152215 -3.375095  
 H -2.143815 2.469546 -4.319495  
 H -3.564290 1.682888 -3.615058  
 H -2.805801 3.040494 -2.770499  
 C -1.626144 0.549907 3.655020  
 H -1.196727 1.016087 4.550209  
 H -2.609753 0.155444 3.933576  
 H -0.998600 -0.300730 3.375249  
 C -2.611127 2.766531 2.961100  
 H -3.625948 2.425539 3.197795  
 H -2.197642 3.239381 3.860582  
 H -2.688750 3.521819 2.174625

O -2.307812 3.787683 -0.331428  
 O 3.122909 2.871290 0.072734  
 C -2.824419 5.100478 -0.480227  
 H -2.461327 5.575054 -1.401541  
 H -3.908214 4.986673 -0.535721  
 H -2.570100 5.735365 0.379025  
 C 4.048154 3.945981 0.130251  
 H 3.841712 4.607553 0.981231  
 H 5.030078 3.487093 0.258710  
 H 4.043376 4.534416 -0.796393  
 Pd -0.202373 -1.301569 0.004244  
 C 0.998396 -2.889951 -0.321213  
 C 1.419197 -3.172533 -1.627853  
 C 1.363236 -3.767911 0.706136  
 C 2.221707 -4.289548 -1.895132  
 H 1.117260 -2.534715 -2.455078  
 C 2.164568 -4.882653 0.437595  
 H 1.017786 -3.599287 1.720619  
 C 2.602098 -5.145784 -0.862216  
 H 2.538340 -4.488761 -2.916663  
 H 2.435821 -5.552931 1.250327  
 H 3.221008 -6.015138 -1.068244  
 N -1.727596 -2.686212 -0.138482  
 C -2.320553 -3.311227 0.910292  
 C -1.796755 -3.006597 2.309378  
 H -1.528300 -3.952553 2.792740  
 H -0.930042 -2.338699 2.313930  
 H -2.597251 -2.554604 2.904913  
 O -3.271958 -4.103908 0.800256  
 C -2.121526 -3.156303 -1.462810  
 H -2.640680 -4.115524 -1.377145  
 H -2.794571 -2.446380 -1.959936  
 H -1.236553 -3.281070 -2.095981  
 C 2.760366 0.036320 -1.355711  
 C 2.333184 0.819668 -2.614246  
 C 4.275206 0.194363 -1.105922  
 H 2.590629 -1.025644 -1.564170  
 C 3.145204 0.380304 -3.845629  
 H 2.482491 1.893775 -2.445582  
 H 1.266035 0.675621 -2.812527  
 C 5.074632 -0.261529 -2.341222  
 H 4.510013 1.240092 -0.885786  
 H 4.591324 -0.397266 -0.240329  
 C 4.655748 0.503312 -3.604115  
 H 2.846003 0.978173 -4.716297  
 H 2.900891 -0.664766 -4.085254  
 H 6.148048 -0.129575 -2.152334  
 H 4.914780 -1.338131 -2.497899  
 H 5.212249 0.135481 -4.475603  
 H 4.919599 1.565548 -3.489461  
 C 2.659309 0.323475 1.645546  
 C 2.036176 1.069386 2.841378  
 C 3.059923 -1.101361 2.075814  
 H 3.561360 0.869228 1.352835  
 C 3.013220 1.113402 4.030157  
 H 1.116276 0.559412 3.152679

H 1.755909 2.089518 2.558902  
 C 4.047615 -1.064454 3.254762  
 H 2.158200 -1.647191 2.376030  
 H 3.490228 -1.666594 1.242190  
 C 3.469044 -0.291623 4.448613  
 H 2.540792 1.629459 4.876014  
 H 3.892632 1.712749 3.750496  
 H 4.304420 -2.089279 3.551189  
 H 4.985498 -0.588510 2.931107  
 H 4.207247 -0.227309 5.258226  
 H 2.608467 -0.844694 4.852618

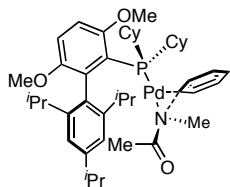

**Transition State 10-TS**

C -3.475277 0.191146 1.242640  
 C -4.081498 -0.282608 0.078336  
 C -3.474173 0.040960 -1.138074  
 C -2.321265 0.830771 -1.214536  
 C -1.721161 1.305224 -0.017534  
 C -2.321592 0.984639 1.227888  
 H -3.943116 -0.036295 2.197649  
 H -3.930239 -0.302196 -2.063258  
 C -0.645468 2.370556 -0.080056  
 C 0.753884 2.164806 -0.022694  
 C -1.140995 3.699924 -0.191338  
 C 1.609698 3.298521 -0.053194  
 C -0.277470 4.788360 -0.230197  
 C 1.100487 4.588211 -0.156761  
 H -0.656583 5.799932 -0.312746  
 H 1.756984 5.449287 -0.183640  
 P 1.471252 0.439908 0.102309  
 C -1.824325 1.561696 2.553411  
 H -0.845952 2.017870 2.377762  
 C -5.403854 -1.038135 0.147644  
 H -5.601795 -1.237954 1.209816  
 C -5.376537 -2.395233 -0.576338  
 H -5.174105 -2.272764 -1.647749  
 H -4.617703 -3.063663 -0.158119  
 H -6.350745 -2.890944 -0.484342  
 C -6.557263 -0.157116 -0.375405  
 H -7.519620 -0.669839 -0.257630  
 H -6.607262 0.794997 0.164959  
 H -6.427293 0.069979 -1.440573  
 C -1.805978 1.227430 -2.597965  
 H -0.887629 1.806784 -2.461484  
 C -1.453967 0.006158 -3.467503  
 H -1.034544 0.327408 -4.429072  
 H -0.719042 -0.631325 -2.963779  
 H -2.337830 -0.606058 -3.680609  
 C -2.812836 2.139407 -3.329108

H -2.396311 2.484001 -4.283793  
 H -3.745931 1.606021 -3.546149  
 H -3.061603 3.014719 -2.721921  
 C -1.643450 0.490917 3.645071  
 H -1.199324 0.936928 4.543386  
 H -2.600417 0.046736 3.942388  
 H -0.991767 -0.319929 3.304537  
 C -2.766605 2.677809 3.052782  
 H -3.759373 2.275329 3.287999  
 H -2.367352 3.140254 3.964185  
 H -2.894059 3.455810 2.294677  
 O -2.505104 3.829865 -0.251213  
 O 2.955931 3.049121 0.025988  
 C -3.055549 5.130206 -0.379231  
 H -2.720145 5.622408 -1.302005  
 H -4.137329 4.991139 -0.417388  
 H -2.802314 5.764692 0.480854  
 C 3.853476 4.146808 0.061782  
 H 3.657830 4.798345 0.923276  
 H 4.850889 3.713493 0.155814  
 H 3.803990 4.741233 -0.859979  
 Pd -0.112322 -1.297975 0.017218  
 C 0.759002 -3.199941 -0.302384  
 C 1.300498 -3.360247 -1.597602  
 C 1.376798 -3.901094 0.757021  
 C 2.440036 -4.141721 -1.806626  
 H 0.851222 -2.856234 -2.445722  
 C 2.510703 -4.678592 0.530643  
 H 0.987727 -3.832249 1.764495  
 C 3.059472 -4.807681 -0.749196  
 H 2.840792 -4.223829 -2.814889  
 H 2.967044 -5.194118 1.373120  
 H 3.938763 -5.422575 -0.917350  
 N -1.125374 -3.144114 -0.261282  
 C -1.806653 -3.725974 0.797322  
 C -1.450665 -3.313808 2.216460  
 H -1.171984 -4.203357 2.792380  
 H -0.658793 -2.563517 2.272222  
 H -2.352975 -2.896884 2.675284  
 O -2.723492 -4.525990 0.609528  
 C -1.640832 -3.535229 -1.577919  
 H -1.352204 -4.562978 -1.832642  
 H -2.729701 -3.476277 -1.569422  
 H -1.259880 -2.854940 -2.337845  
 C 2.644632 0.200086 -1.390057  
 C 2.203651 1.008850 -2.626877  
 C 4.162764 0.357036 -1.162996  
 H 2.467239 -0.859775 -1.615159  
 C 2.992473 0.589284 -3.879876  
 H 2.365512 2.077763 -2.438804  
 H 1.132638 0.878180 -2.809590  
 C 4.946492 -0.074657 -2.416971  
 H 4.396113 1.400697 -0.928342  
 H 4.495136 -0.247238 -0.312529  
 C 4.507102 0.707745 -3.662091  
 H 2.679605 1.201517 -4.735920

H 2.742944 -0.451776 -4.132020  
H 6.022423 0.057734 -2.242299  
H 4.787596 -1.149327 -2.587748  
H 5.049497 0.352748 -4.547912  
H 4.772794 1.768306 -3.536434  
C 2.615125 0.490693 1.610044  
C 2.012066 1.236772 2.815120  
C 3.008180 -0.941536 2.026528  
H 3.515684 1.031069 1.303649  
C 2.992656 1.257522 4.001236  
H 1.084985 0.739072 3.125571  
H 1.745581 2.262580 2.539178  
C 3.992583 -0.930012 3.208428  
H 2.099011 -1.487136 2.307702  
H 3.438484 -1.498278 1.186567  
C 3.425024 -0.158251 4.408384  
H 2.532484 1.776027 4.852607  
H 3.882046 1.842770 3.723048  
H 4.234468 -1.960990 3.496826  
H 4.938233 -0.465057 2.891289  
H 4.163228 -0.113272 5.219544  
H 2.554608 -0.700245 4.806708

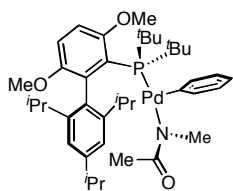

### Complex 25

C 2.860719 -1.014033 1.317435  
C 3.650844 -0.775195 0.192876  
C 3.036679 -0.876302 -1.058783  
C 1.688987 -1.209187 -1.212434  
C 0.892103 -1.451447 -0.050433  
C 1.514689 -1.384226 1.232943  
H 3.331170 -0.967579 2.296450  
H 3.636572 -0.722845 -1.951529  
C -0.404688 -2.230684 -0.171505  
C -1.728272 -1.735008 -0.047884  
C -0.203287 -3.632240 -0.337805  
C -2.793298 -2.680967 -0.020115  
C -1.274341 -4.513936 -0.399483  
C -2.570110 -4.037455 -0.228803  
H -1.118503 -5.575572 -0.547479  
H -3.392558 -4.741560 -0.237868  
P -2.065018 0.121626 0.049279  
C 0.831292 -1.884888 2.508564  
H -0.226256 -2.044770 2.285734  
C 5.149478 -0.540402 0.342665  
H 5.337993 -0.363362 1.410087  
C 5.670136 0.688779 -0.421620  
H 5.516431 0.585372 -1.503273  
H 5.176989 1.604933 -0.082792  
H 6.749437 0.795491 -0.256425

C 5.923503 -1.814306 -0.058294  
H 6.998294 -1.681512 0.114390  
H 5.588463 -2.685420 0.516810  
H 5.780686 -2.040984 -1.122149  
C 1.157671 -1.417412 -2.633050  
H 0.085711 -1.624730 -2.561372  
C 1.337100 -0.177736 -3.529801  
H 0.839847 -0.335692 -4.494621  
H 0.920396 0.720648 -3.068860  
H 2.395864 0.017542 -3.734513  
C 1.815253 -2.636924 -3.314158  
H 1.371470 -2.803083 -4.303607  
H 2.890173 -2.474297 -3.455828  
H 1.689744 -3.543178 -2.718508  
C 0.914443 -0.902791 3.690396  
H 0.373644 -1.309630 4.553585  
H 1.949636 -0.731713 4.005384  
H 0.480787 0.070018 3.444224  
C 1.416059 -3.251613 2.930177  
H 2.466938 -3.152072 3.226310  
H 0.862479 -3.656004 3.786622  
H 1.368707 -3.974677 2.112014  
O 1.098709 -4.052879 -0.413087  
O -4.043700 -2.203046 0.257952  
C 1.359383 -5.441495 -0.540266  
H 0.943318 -5.848923 -1.471407  
H 2.446222 -5.536333 -0.560595  
H 0.960816 -6.006937 0.312508  
C -5.149430 -3.090111 0.205687  
H -5.060707 -3.889688 0.951963  
H -6.028902 -2.484884 0.433197  
H -5.263840 -3.533372 -0.791811  
Pd 0.112952 1.294403 0.025965  
C -0.466731 3.230079 -0.207484  
C -0.613168 3.757192 -1.497827  
C -0.625001 4.094947 0.882531  
C -0.947569 5.102995 -1.692898  
H -0.473183 3.127810 -2.371711  
C -0.958479 5.439842 0.688015  
H -0.476393 3.737790 1.895099  
C -1.126318 5.950344 -0.600041  
H -1.062611 5.482825 -2.705787  
H -1.073290 6.090097 1.552547  
H -1.380696 6.996379 -0.749430  
N 1.979908 2.177621 -0.010364  
C 2.666637 2.610449 1.079113  
C 2.025171 2.434128 2.448743  
H 1.950692 3.417138 2.926639  
H 1.033825 1.975218 2.409085  
H 2.679446 1.817523 3.073767  
O 3.796987 3.124971 1.025200  
C 2.545484 2.549276 -1.302753  
H 3.317550 3.311417 -1.163399  
H 2.997057 1.686226 -1.805336  
H 1.764610 2.950059 -1.956988  
C -3.093924 0.546425 -1.548329



C -3.112566 0.447749 1.671423  
 C -3.594344 2.003666 -1.449332  
 H -2.812743 2.700670 -1.149088  
 H -3.950057 2.315154 -2.440495  
 H -4.436938 2.106363 -0.762109  
 C -4.295058 -0.348762 -1.902784  
 H -4.000092 -1.385334 -2.082446  
 H -5.076294 -0.332382 -1.142365  
 H -4.729456 0.035863 -2.835863  
 C -2.090827 0.444935 -2.713519  
 H -1.212153 1.071121 -2.549075  
 H -1.755478 -0.585633 -2.865017  
 H -2.579385 0.774819 -3.639956  
 C -4.647075 0.486185 1.525707  
 H -5.053454 -0.443332 1.134457  
 H -5.075508 0.646975 2.524448  
 H -4.988212 1.313820 0.900889  
 C -2.746452 -0.614355 2.725564  
 H -1.670101 -0.657715 2.904088  
 H -3.221816 -0.339898 3.676757  
 H -3.099069 -1.610504 2.451111  
 C -2.665803 1.819903 2.210638  
 H -1.597303 1.830873 2.439791  
 H -2.863412 2.631806 1.506609  
 H -3.215752 2.034518 3.137129

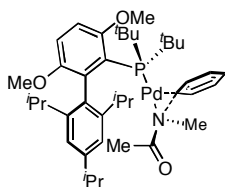

#### Transition State 11-TS

C 1.706700 2.350516 -1.396902  
 C 2.398251 2.791051 -0.266880  
 C 1.729551 2.727029 0.957544  
 C 0.413562 2.263909 1.076044  
 C -0.267893 1.803145 -0.085066  
 C 0.390857 1.878194 -1.343037  
 H 2.201177 2.414186 -2.363781  
 H 2.232175 3.086381 1.850051  
 C -1.768028 1.588642 -0.040597  
 C -2.470635 0.358457 0.079167  
 C -2.506582 2.801844 -0.155782  
 C -3.893741 0.411492 0.104706  
 C -3.893385 2.814848 -0.090168  
 C -4.586137 1.616387 0.045510  
 H -4.450464 3.741619 -0.155635  
 H -5.668113 1.638107 0.080324  
 P -1.549829 -1.301797 0.118543  
 C -0.328451 1.594811 -2.662940  
 H -1.310170 1.176439 -2.425084  
 C 3.777811 3.423309 -0.423400  
 H 4.237485 2.968615 -1.312369

C 4.731648 3.182910 0.757037  
 H 4.364591 3.653558 1.677700  
 H 4.883434 2.115068 0.940215  
 H 5.708853 3.629877 0.538218  
 C 3.630098 4.934337 -0.707281  
 H 4.609905 5.390649 -0.893907  
 H 2.994035 5.117938 -1.580542  
 H 3.176149 5.446938 0.149955  
 C -0.267153 2.390875 2.442229  
 H -1.217205 1.849173 2.397037  
 C 0.557677 1.794284 3.598513  
 H -0.027450 1.815203 4.525968  
 H 0.850019 0.760619 3.403285  
 H 1.471833 2.370837 3.781121  
 C -0.595069 3.864902 2.766897  
 H -1.136650 3.934435 3.718566  
 H 0.324721 4.454699 2.861834  
 H -1.203690 4.321254 1.983913  
 C 0.405814 0.571133 -3.547284  
 H -0.176650 0.362830 -4.453367  
 H 1.387155 0.940581 -3.866510  
 H 0.559172 -0.370952 -3.010133  
 C -0.569859 2.901925 -3.447262  
 H 0.378903 3.355456 -3.757725  
 H -1.158234 2.703932 -4.351879  
 H -1.105782 3.634018 -2.836690  
 O -1.768270 3.943548 -0.341017  
 O -4.559621 -0.781926 0.160471  
 C -2.452878 5.174575 -0.503761  
 H -3.032596 5.438906 0.391039  
 H -1.676641 5.924954 -0.662898  
 H -3.122072 5.153174 -1.374296  
 C -5.971245 -0.780600 0.290976  
 H -6.459213 -0.332443 -0.584286  
 H -6.265175 -1.829275 0.365765  
 H -6.291669 -0.250010 1.196786  
 Pd 0.839182 -0.980588 -0.098953  
 C 2.131504 -2.689117 -0.184327  
 C 2.321695 -3.456766 0.985640  
 C 2.229617 -3.354862 -1.424539  
 C 2.550370 -4.831110 0.908916  
 H 2.272606 -2.995752 1.963061  
 C 2.457632 -4.730306 -1.485491  
 H 2.105100 -2.809549 -2.352262  
 C 2.621019 -5.485349 -0.323154  
 H 2.675285 -5.391963 1.832786  
 H 2.506438 -5.210281 -2.460627  
 H 2.809067 -6.553764 -0.375409  
 N 2.947334 -0.972296 -0.241136  
 C 3.561496 -0.764711 -1.557303  
 C -1.893434 -2.108705 1.848650  
 C -2.300916 -2.411630 -1.310732  
 C -3.349024 -2.256655 2.327112  
 H -3.836756 -1.287494 2.451677  
 H -3.958480 -2.866028 1.659565  
 H -3.333385 -2.749868 3.309156

C -1.222353 -3.499146 1.847780  
 H -0.182075 -3.456794 1.517632  
 H -1.236070 -3.896849 2.871780  
 H -1.749505 -4.219214 1.216447  
 C -1.161883 -1.224438 2.875171  
 H -1.232136 -1.687733 3.868517  
 H -0.104238 -1.110983 2.623598  
 H -1.608047 -0.227620 2.941873  
 C -3.448761 -3.372800 -0.942236  
 H -4.328547 -2.849856 -0.575491  
 H -3.736214 -3.922601 -1.849132  
 H -3.149296 -4.119782 -0.202980  
 C -2.769430 -1.500857 -2.462311  
 H -3.025682 -2.130091 -3.325299  
 H -3.655294 -0.918464 -2.199680  
 H -1.983129 -0.812950 -2.784590  
 C -1.132521 -3.270951 -1.834085  
 H -0.326850 -2.652901 -2.234836  
 H -0.698275 -3.907948 -1.059512  
 H -1.500120 -3.921706 -2.639714  
 H 4.329873 -1.518920 -1.768947  
 H 2.793744 -0.799918 -2.328665  
 H 4.032953 0.219380 -1.576737  
 C 3.780745 -0.622792 0.808388  
 O 4.934602 -0.239233 0.606667  
 C 3.248834 -0.671244 2.228298  
 H 3.421805 0.309539 2.681108  
 H 2.184053 -0.899895 2.286830  
 H 3.822386 -1.405050 2.805644

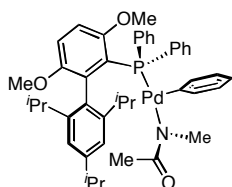

#### Complex 26

C -3.312992 0.142145 1.287593  
 C -3.964425 -0.324336 0.142556  
 C -3.393869 -0.017820 -1.095913  
 C -2.226838 0.743207 -1.215933  
 C -1.588968 1.222928 -0.036158  
 C -2.154605 0.924477 1.233692  
 H -3.751082 -0.079991 2.257955  
 H -3.883101 -0.363410 -2.001859  
 C -0.540056 2.305018 -0.146264  
 C 0.853600 2.104049 -0.103108  
 C -1.032775 3.629411 -0.295326  
 C 1.730548 3.217232 -0.215945  
 C -0.158204 4.704243 -0.426340  
 C 1.221928 4.500820 -0.389100  
 H -0.533701 5.713032 -0.550764  
 H 1.883868 5.353595 -0.482225  
 P 1.552981 0.399688 0.082425

C -1.616949 1.538154 2.527981  
 H -0.705098 2.092037 2.284550  
 C -5.306941 -1.037181 0.263914  
 H -5.394210 -1.376831 1.304907  
 C -5.450370 -2.276670 -0.634894  
 H -5.380008 -2.014709 -1.698237  
 H -4.690530 -3.030131 -0.405931  
 H -6.437345 -2.729986 -0.480715  
 C -6.452665 -0.033508 0.009644  
 H -7.426369 -0.513368 0.165438  
 H -6.385067 0.831451 0.679652  
 H -6.422936 0.339718 -1.021655  
 C -1.735253 1.122141 -2.614654  
 H -0.794831 1.672391 -2.501730  
 C -1.447383 -0.105037 -3.499399  
 H -1.032579 0.212482 -4.464452  
 H -0.735913 -0.785482 -3.020113  
 H -2.358567 -0.677105 -3.705325  
 C -2.732233 2.065796 -3.319214  
 H -2.331153 2.394697 -4.285841  
 H -3.685609 1.558978 -3.509214  
 H -2.939093 2.949320 -2.708900  
 C -1.235946 0.490252 3.588527  
 H -0.849447 0.987225 4.486520  
 H -2.096611 -0.117272 3.889685  
 H -0.460478 -0.186936 3.218302  
 C -2.623481 2.556371 3.103826  
 H -3.547607 2.061452 3.424673  
 H -2.196893 3.065181 3.977035  
 H -2.889668 3.310742 2.356888  
 O -2.395757 3.765962 -0.297136  
 O 3.062455 2.948338 -0.121550  
 C -2.945586 5.065205 -0.446916  
 H -2.659663 5.516810 -1.406252  
 H -4.028357 4.932978 -0.419212  
 H -2.640077 5.730548 0.371625  
 C 3.996405 3.993083 -0.337961  
 H 3.920955 4.768102 0.436201  
 H 4.979855 3.523648 -0.286740  
 H 3.862941 4.451305 -1.326190  
 C 2.837754 0.306407 -1.245116  
 C 4.209705 0.176977 -0.996553  
 C 2.388257 0.330706 -2.573852  
 C 5.112037 0.070431 -2.056640  
 H 4.579979 0.169382 0.022763  
 C 3.292724 0.240347 -3.632447  
 H 1.326324 0.416505 -2.785155  
 C 4.658537 0.104731 -3.376361  
 H 5.363528 0.022839 -4.199288  
 C 2.454463 0.420971 1.692961  
 C 3.192251 -0.713402 2.074477  
 C 2.363271 1.496897 2.588492  
 C 3.838705 -0.755953 3.310550  
 H 3.252366 -1.571722 1.414449  
 C 2.999843 1.444921 3.829680  
 H 1.793969 2.380080 2.321167

C 3.744017 0.321796 4.192953  
 H 4.241231 0.283855 5.158463  
 Pd -0.065775 -1.313458 -0.071031  
 C 1.304753 -2.784163 -0.197759  
 C 1.922978 -3.053343 -1.423441  
 C 1.612851 -3.578661 0.913448  
 C 2.851637 -4.095673 -1.532325  
 H 1.698791 -2.453384 -2.300099  
 C 2.543880 -4.617624 0.799723  
 H 1.131180 -3.401217 1.869756  
 C 3.166988 -4.879472 -0.422180  
 H 3.326449 -4.289290 -2.491602  
 H 2.769935 -5.229341 1.670477  
 H 3.885256 -5.690687 -0.508888  
 N -1.478252 -2.798224 -0.253220  
 C -2.108989 -3.434297 0.765995  
 C -1.717709 -3.055220 2.188997  
 H -1.303748 -3.940191 2.686016  
 H -0.989488 -2.241332 2.235428  
 H -2.616010 -2.764672 2.743856  
 O -2.987710 -4.298087 0.601287  
 C -1.747083 -3.324929 -1.588276  
 H -2.095996 -4.360345 -1.524392  
 H -2.520491 -2.739778 -2.105351  
 H -0.835051 -3.285350 -2.192967  
 H 2.927642 0.265420 -4.655823  
 H 6.173427 -0.035887 -1.847672  
 H 4.408571 -1.639617 3.584843  
 H 2.914411 2.287336 4.511110

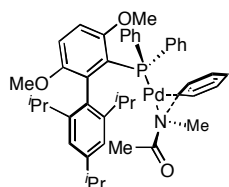

#### Transition State 12-TS

C -3.330591 -0.161928 1.353025  
 C -3.914993 -0.746954 0.227841  
 C -3.426494 -0.364775 -1.024808  
 C -2.405052 0.579780 -1.174817  
 C -1.838144 1.172104 -0.016665  
 C -2.314054 0.796974 1.263239  
 H -3.703859 -0.441487 2.335920  
 H -3.867479 -0.799618 -1.917590  
 C -0.900692 2.347728 -0.154980  
 C 0.509047 2.278465 -0.127847  
 C -1.520643 3.616328 -0.308107  
 C 1.267634 3.474665 -0.253804  
 C -0.758010 4.771050 -0.455041  
 C 0.635119 4.702137 -0.428584  
 H -1.230731 5.737595 -0.583352  
 H 1.209840 5.614987 -0.530683  
 P 1.384393 0.647228 0.051442  
 C -1.818501 1.465327 2.545534

H -0.972014 2.108220 2.285733  
 C -5.100335 -1.694165 0.375961  
 H -5.164935 -1.963198 1.439511  
 C -4.953694 -3.002079 -0.421715  
 H -4.893613 -2.809416 -1.500115  
 H -4.064380 -3.567054 -0.125666  
 H -5.828890 -3.641937 -0.255870  
 C -6.412698 -0.971487 0.005831  
 H -7.276000 -1.626855 0.173536  
 H -6.550296 -0.063324 0.603511  
 H -6.413402 -0.679049 -1.051360  
 C -1.990683 0.992310 -2.587563  
 H -1.125316 1.658380 -2.503359  
 C -1.560016 -0.209450 -3.449320  
 H -1.192320 0.131867 -4.425197  
 H -0.764929 -0.779434 -2.955569  
 H -2.394300 -0.895870 -3.634501  
 C -3.112081 1.786475 -3.288700  
 H -2.775882 2.143468 -4.270126  
 H -3.998508 1.160323 -3.446884  
 H -3.415208 2.649657 -2.689069  
 C -1.310702 0.455637 3.590832  
 H -0.922525 0.984158 4.469756  
 H -2.109762 -0.211862 3.933326  
 H -0.503739 -0.161855 3.184167  
 C -2.911545 2.373939 3.145618  
 H -3.776650 1.786631 3.476094  
 H -2.525164 2.918431 4.016163  
 H -3.264484 3.101946 2.408246  
 O -2.892028 3.619562 -0.298034  
 O 2.621238 3.344340 -0.167809  
 C -3.564505 4.861515 -0.422378  
 H -3.346467 5.347130 -1.383227  
 H -4.629460 4.628476 -0.371136  
 H -3.303220 5.546631 0.395380  
 C 3.441461 4.480832 -0.375688  
 H 3.286007 5.239055 0.403550  
 H 4.468548 4.116065 -0.326168  
 H 3.263162 4.930832 -1.360843  
 C 2.688983 0.696347 -1.266767  
 C 4.063566 0.758004 -1.002671  
 C 2.262493 0.604297 -2.600358  
 C 4.988163 0.729523 -2.048429  
 H 4.416440 0.835566 0.020067  
 C 3.186285 0.596078 -3.646182  
 H 1.202087 0.534605 -2.824990  
 C 4.554348 0.653782 -3.373157  
 H 5.276057 0.634311 -4.185533  
 C 2.294645 0.771444 1.654808  
 C 3.104692 -0.313581 2.035361  
 C 2.148973 1.844444 2.546139  
 C 3.767768 -0.309771 3.262978  
 H 3.210766 -1.170671 1.377672  
 C 2.800385 1.837506 3.781403  
 H 1.524565 2.690971 2.282231  
 C 3.616231 0.764587 4.142291

H 4.125267 0.762524 5.102493  
 Pd 0.139283 -1.319367 -0.126386  
 C 1.334678 -3.063278 -0.179145  
 C 2.046581 -3.243334 -1.383216  
 C 1.910909 -3.546119 1.014547  
 C 3.303255 -3.851686 -1.380204  
 H 1.643656 -2.880466 -2.321459  
 C 3.164982 -4.157399 0.997362  
 H 1.397823 -3.434118 1.960414  
 C 3.874461 -4.318839 -0.195619  
 H 3.838068 -3.952537 -2.321903  
 H 3.585431 -4.514178 1.935319  
 H 4.846630 -4.803115 -0.201712  
 N -0.543765 -3.305277 -0.355208  
 C -1.243587 -3.941156 0.659610  
 C -1.129801 -3.412197 2.079602  
 H -0.724835 -4.198161 2.726978  
 H -0.528826 -2.504971 2.168829  
 H -2.142818 -3.191731 2.430353  
 O -1.991433 -4.889945 0.421808  
 C -0.837592 -3.832430 -1.692263  
 H -0.373923 -4.814334 -1.850604  
 H -1.918095 -3.942347 -1.803967  
 H -0.474901 -3.136064 -2.447628  
 H 2.670492 2.676748 4.460030  
 H 4.394709 -1.155105 3.534349  
 H 6.051276 0.771088 -1.824698  
 H 2.835858 0.532932 -4.673277

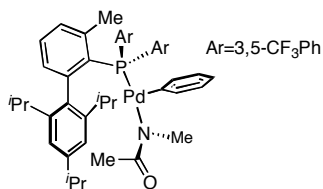

**Complex 27**

C -4.313640 1.340206 0.021522  
 C -5.001523 0.148570 0.268194  
 C -4.488858 -1.025218 -0.294020  
 C -3.339765 -1.035412 -1.091513  
 C -2.665854 0.194626 -1.344469  
 C -3.172949 1.400750 -0.786315  
 H -4.707882 2.262926 0.440923  
 H -5.010188 -1.962466 -0.122668  
 C -1.667525 0.265942 -2.478452  
 C -0.253995 0.220793 -2.368467  
 C -2.244136 0.400750 -3.753383  
 C 0.553281 0.307257 -3.538608  
 C -1.459600 0.484619 -4.896457  
 C -0.073655 0.438591 -4.782729  
 H -1.924917 0.590518 -5.872569  
 H 0.543234 0.508642 -5.674584  
 P 0.459324 0.057651 -0.669147  
 C -2.587543 2.766167 -1.150224  
 H -1.667652 2.595225 -1.717328

C -6.319605 0.170886 1.034026  
 H -6.372646 1.140581 1.547177  
 C -6.442220 -0.922408 2.108796  
 H -6.409184 -1.927092 1.668604  
 H -5.649900 -0.842152 2.859177  
 H -7.407343 -0.827343 2.620863  
 C -7.501721 0.109203 0.042687  
 H -8.455169 0.198084 0.576683  
 H -7.447980 0.915277 -0.698199  
 H -7.508806 -0.844294 -0.499871  
 C -2.900839 -2.343972 -1.753020  
 H -1.943794 -2.160017 -2.253567  
 C -2.674515 -3.486522 -0.745812  
 H -2.257745 -4.362353 -1.256947  
 H -1.979598 -3.186935 0.045393  
 H -3.607929 -3.795334 -0.262422  
 C -3.901838 -2.779970 -2.842907  
 H -3.558417 -3.699624 -3.331221  
 H -4.890764 -2.976945 -2.413021  
 H -4.018667 -2.010597 -3.613389  
 C -2.209791 3.622028 0.071787  
 H -1.714792 4.542712 -0.257122  
 H -3.089550 3.905469 0.660464  
 H -1.524043 3.087311 0.736168  
 C -3.545081 3.541119 -2.079510  
 H -4.494321 3.757796 -1.576255  
 H -3.097162 4.495981 -2.379231  
 H -3.770017 2.971220 -2.987677  
 C 1.705934 -1.301904 -0.801384  
 C 3.080677 -1.159662 -0.590002  
 C 1.190441 -2.582250 -1.039813  
 C 3.918255 -2.277858 -0.617019  
 H 3.515521 -0.185514 -0.399317  
 C 2.029302 -3.695416 -1.061746  
 H 0.125642 -2.721901 -1.194555  
 C 3.400053 -3.551745 -0.848236  
 H 4.051798 -4.417413 -0.854706  
 C 1.399816 1.622959 -0.378714  
 C 2.177506 1.751192 0.781471  
 C 1.233371 2.745799 -1.201354  
 C 2.773602 2.971673 1.105491  
 H 2.299221 0.911432 1.455630  
 C 1.823085 3.965468 -0.864630  
 H 0.643019 2.677304 -2.107540  
 C 2.597430 4.087675 0.289508  
 H 3.057073 5.034515 0.546007  
 C 5.407085 -2.094684 -0.457670  
 C 1.414511 -5.063170 -1.212461  
 C 3.556818 3.066719 2.391709  
 C 1.551541 5.176219 -1.720766  
 F 2.309637 -5.978321 -1.632647  
 F 0.912859 -5.499262 -0.034524  
 F 0.389794 -5.052931 -2.094941  
 F 5.986876 -3.179710 0.094492  
 F 6.003514 -1.890833 -1.654816  
 F 5.698542 -1.029319 0.316400

F 4.250565 4.219074 2.477411  
 F 4.431855 2.047188 2.510623  
 F 2.735004 3.008394 3.465800  
 F 1.401085 4.844418 -3.020858  
 F 2.545036 6.083417 -1.638400  
 F 0.411121 5.799585 -1.338889  
 Pd -1.087997 -0.385802 1.057756  
 C 0.329598 -0.891663 2.401962  
 C 0.801157 -2.208015 2.450209  
 C 0.837351 0.053341 3.300801  
 C 1.791070 -2.566856 3.373337  
 H 0.410131 -2.966714 1.777967  
 C 1.835806 -0.308024 4.213930  
 H 0.468385 1.074321 3.299863  
 C 2.315280 -1.618315 4.252744  
 H 2.148561 -3.593641 3.399969  
 H 2.231538 0.443142 4.892768  
 H 3.085797 -1.898832 4.965746  
 N -2.436834 -0.805191 2.540003  
 C -2.964995 0.099036 3.407091  
 C -2.485240 1.541522 3.319153  
 H -2.048737 1.822926 4.283996  
 H -1.747597 1.706240 2.529021  
 H -3.344594 2.198333 3.148008  
 O -3.825906 -0.195320 4.251025  
 C -2.782295 -2.199581 2.805695  
 H -2.974331 -2.349300 3.872948  
 H -3.685000 -2.503292 2.258315  
 H -1.961056 -2.850429 2.491989  
 H -3.326054 0.442142 -3.832085  
 C 2.066680 0.255806 -3.537209  
 H 2.514745 0.859002 -2.743936  
 H 2.433305 -0.769150 -3.413128  
 H 2.453172 0.628361 -4.490329

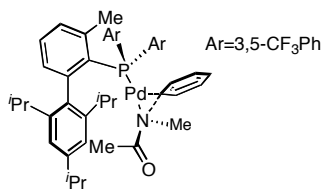

**Transition State 13-TS**

C -4.330247 1.361725 0.110998  
 C -4.975039 0.141960 0.329587  
 C -4.481774 -0.980839 -0.343376  
 C -3.395930 -0.909397 -1.223543  
 C -2.765677 0.345191 -1.438105  
 C -3.244568 1.495574 -0.763627  
 H -4.705670 2.245930 0.621198  
 H -4.968743 -1.940880 -0.194916  
 C -1.768074 0.492824 -2.563388  
 C -0.352824 0.422696 -2.451317  
 C -2.339901 0.723962 -3.825997  
 C 0.454158 0.581485 -3.613891  
 C -1.552502 0.877815 -4.960290

C -0.168034 0.806181 -4.847710  
 H -2.014500 1.057188 -5.927284  
 H 0.452175 0.930145 -5.731507  
 P 0.359663 0.132074 -0.762426  
 C -2.663271 2.886450 -1.017115  
 H -1.761712 2.766695 -1.625633  
 C -6.217413 0.070709 1.209914  
 H -6.299695 1.037350 1.725650  
 C -6.143591 -1.022734 2.290258  
 H -6.059915 -2.021730 1.844790  
 H -5.293030 -0.877335 2.963514  
 H -7.057424 -1.013649 2.896277  
 C -7.483053 -0.095563 0.342954  
 H -8.384024 -0.075606 0.967604  
 H -7.564999 0.704612 -0.401340  
 H -7.469297 -1.051725 -0.194323  
 C -2.968485 -2.167720 -1.980995  
 H -2.035956 -1.939473 -2.508051  
 C -2.682926 -3.361220 -1.050314  
 H -2.254856 -4.194469 -1.620130  
 H -1.973086 -3.082318 -0.263173  
 H -3.593304 -3.726216 -0.561569  
 C -4.007938 -2.554413 -3.052881  
 H -3.677697 -3.441552 -3.606413  
 H -4.978011 -2.784281 -2.596620  
 H -4.160755 -1.743267 -3.772839  
 C -2.240986 3.608742 0.275739  
 H -1.719374 4.540602 0.030043  
 H -3.104369 3.863140 0.901261  
 H -1.566123 2.987851 0.873850  
 C -3.640708 3.757939 -1.832056  
 H -4.577632 3.917820 -1.285667  
 H -3.198556 4.740125 -2.037641  
 H -3.888659 3.289649 -2.790924  
 C 1.638568 -1.190129 -0.984384  
 C 3.011429 -1.029794 -0.769982  
 C 1.149414 -2.473979 -1.259973  
 C 3.870674 -2.130511 -0.831218  
 H 3.426055 -0.053534 -0.546164  
 C 2.009299 -3.569363 -1.318566  
 H 0.086116 -2.627713 -1.410631  
 C 3.377810 -3.406539 -1.102306  
 H 4.045974 -4.258878 -1.134150  
 C 1.288541 1.680032 -0.355996  
 C 1.993685 1.730812 0.857145  
 C 1.178277 2.852992 -1.113733  
 C 2.573855 2.922799 1.292826  
 H 2.069176 0.847635 1.483362  
 C 1.748601 4.046466 -0.663098  
 H 0.642184 2.847263 -2.056211  
 C 2.450860 4.091059 0.540389  
 H 2.894239 5.016853 0.885551  
 C 5.354549 -1.923554 -0.661416  
 C 1.419680 -4.941874 -1.512546  
 C 3.277973 2.933687 2.626374  
 C 1.529988 5.304776 -1.462701

F 2.336827 -5.835685 -1.932173  
 F 0.897260 -5.414144 -0.356114  
 F 0.413795 -4.928846 -2.416789  
 F 5.959551 -3.022584 -0.165062  
 F 5.948177 -1.644242 -1.845026  
 F 5.623945 -0.893903 0.167716  
 F 3.948024 4.083756 2.838528  
 F 4.159367 1.917438 2.729411  
 F 2.394870 2.789133 3.645176  
 F 1.607004 5.069805 -2.790571  
 F 2.431210 6.260361 -1.160902  
 F 0.300959 5.826775 -1.229332  
 Pd -1.005119 -0.520847 1.004828  
 C 0.112261 -1.224324 2.657944  
 C 0.667382 -2.507811 2.489338  
 C 0.800477 -0.292718 3.460221  
 C 1.891095 -2.830049 3.081513  
 H 0.172910 -3.252951 1.877073  
 C 2.024340 -0.631381 4.041419  
 H 0.408721 0.703305 3.618898  
 C 2.579278 -1.900952 3.862896  
 H 2.304783 -3.822820 2.920120  
 H 2.544239 0.117963 4.632501  
 H 3.526553 -2.160462 4.326078  
 N -1.816834 -1.239209 2.811320  
 C -2.427489 -0.371874 3.705454  
 C -2.113307 1.112683 3.626510  
 H -1.664208 1.438058 4.571518  
 H -1.462533 1.383482 2.792284  
 H -3.062055 1.646867 3.515962  
 O -3.250334 -0.778966 4.524562  
 C -2.271048 -2.628702 2.932206  
 H -1.894543 -3.097300 3.849870  
 H -3.362408 -2.648183 2.960511  
 H -1.933930 -3.202437 2.070037  
 H -3.421342 0.783250 -3.902553  
 C 1.967001 0.511889 -3.616363  
 H 2.420757 1.054827 -2.783871  
 H 2.321221 -0.523302 -3.559963  
 H 2.359023 0.942709 -4.542370

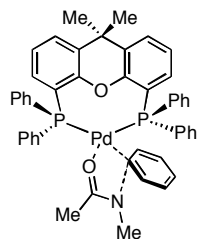

**Transition State 14-TS**

Pd 0.731396 -0.992934 -0.427612  
 P -1.844342 -1.166540 0.097047  
 P 1.412712 1.253783 0.171378  
 O -1.555076 1.704547 -0.153035  
 C 2.425400 -2.044012 0.016773

C 1.926926 -3.323918 0.339182  
 H 1.072352 -3.723615 -0.198237  
 C 2.552753 -4.090641 1.328404  
 H 2.144550 -5.068124 1.577363  
 C 3.706491 -3.627359 1.964183  
 H 4.199342 -4.231156 2.721474  
 C 4.236565 -2.388905 1.589348  
 H 5.145689 -2.020800 2.060986  
 C 3.616684 -1.603576 0.613196  
 H 4.059089 -0.657225 0.330410  
 C -2.747311 1.329553 -0.744985  
 C -3.083022 -0.028351 -0.659917  
 C -4.286904 -0.433742 -1.252065  
 H -4.578255 -1.477656 -1.211573  
 C -5.099465 0.490764 -1.908396  
 H -6.026544 0.162565 -2.369951  
 C -4.729537 1.834682 -1.976662  
 H -5.376612 2.536141 -2.492424  
 C -3.543060 2.283651 -1.385988  
 C -3.081681 3.743419 -1.339109  
 C -1.549844 3.740685 -1.426804  
 C -0.797934 4.734156 -2.060379  
 H -1.298265 5.539983 -2.586364  
 C 0.594959 4.710052 -2.016019  
 H 1.166976 5.492349 -2.506790  
 C 1.259882 3.690202 -1.338102  
 H 2.342409 3.693252 -1.310666  
 C 0.550859 2.656372 -0.704562  
 C -0.850701 2.714427 -0.774534  
 C -3.723939 4.585695 -2.454363  
 H -4.813866 4.587549 -2.357344  
 H -3.465728 4.207909 -3.449372  
 H -3.404257 5.629973 -2.386619  
 C -3.492323 4.345019 0.036427  
 H -4.583019 4.332174 0.145961  
 H -3.146342 5.382123 0.116950  
 H -3.059161 3.775092 0.864089  
 C -2.607879 -2.828155 -0.191249  
 C -2.160007 -3.582771 -1.288686  
 H -1.356289 -3.201162 -1.912790  
 C -2.723734 -4.833363 -1.555400  
 H -2.368054 -5.410136 -2.405472  
 C -3.726778 -5.347512 -0.732268  
 H -4.157701 -6.323780 -0.939772  
 C -4.169822 -4.606209 0.365875  
 H -4.946529 -5.002526 1.015131  
 C -3.615078 -3.354350 0.635336  
 H -3.964311 -2.788299 1.493631  
 C -2.102125 -0.940214 1.914878  
 C -3.133590 -0.167785 2.467011  
 H -3.833169 0.348653 1.816667  
 C -3.275867 -0.059383 3.852854  
 H -4.079621 0.545874 4.264577  
 C -2.396295 -0.728546 4.704230  
 H -2.510483 -0.646621 5.781977  
 C -1.365508 -1.501267 4.163628

H -0.673256 -2.023552 4.818896  
 C -1.213330 -1.599405 2.781043  
 H -0.398171 -2.191218 2.371140  
 C 3.168664 1.648288 -0.264839  
 C 3.656197 1.172239 -1.494153  
 H 3.029604 0.531999 -2.109166  
 C 4.957671 1.469939 -1.899119  
 H 5.322908 1.093879 -2.851049  
 C 5.794274 2.230100 -1.077392  
 H 6.810812 2.453538 -1.390580  
 C 5.322721 2.691678 0.152571  
 H 5.970120 3.276430 0.801050  
 C 4.015746 2.406298 0.556446  
 H 3.658020 2.776197 1.512008  
 C 1.300772 1.754077 1.948809  
 C 1.629985 0.794946 2.920471  
 H 1.913098 -0.207506 2.612684  
 C 1.599869 1.121880 4.276203  
 H 1.861898 0.369967 5.015723  
 C 1.223183 2.403887 4.682219  
 H 1.191017 2.654616 5.739310  
 C 0.883120 3.360510 3.724492  
 H 0.585633 4.359737 4.032297  
 C 0.926130 3.040356 2.365812  
 H 0.668871 3.796199 1.630310  
 O 0.541820 -2.296580 -2.240410  
 C 1.682772 -2.470011 -2.805739  
 N 2.801446 -2.106265 -2.239126  
 C 1.657664 -3.147622 -4.172150  
 H 0.635601 -3.185893 -4.552725  
 H 2.293945 -2.619959 -4.891588  
 H 2.041711 -4.172709 -4.090037  
 C 4.094716 -2.441414 -2.788597  
 H 4.348586 -1.842704 -3.679963  
 H 4.854951 -2.228069 -2.027488  
 H 4.198997 -3.503241 -3.064927

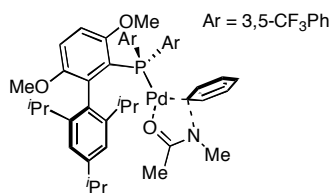

Transition State **15-TS**

C -4.307280 1.306351 0.682707  
 C -4.881447 0.075269 1.008154  
 C -4.407111 -1.058059 0.347975  
 C -3.395888 -0.997795 -0.618210  
 C -2.822379 0.263351 -0.928499  
 C -3.293797 1.430483 -0.270849  
 H -4.660728 2.203063 1.184000  
 H -4.840307 -2.024253 0.595001  
 C -1.897146 0.406590 -2.111475  
 C -0.488204 0.397628 -2.045120  
 C -2.517173 0.598663 -3.373832

C 0.276307 0.599360 -3.226711  
 C -1.751073 0.768085 -4.524413  
 C -0.357464 0.772264 -4.453343  
 H -2.223150 0.910309 -5.489228  
 H 0.215611 0.922128 -5.360440  
 P 0.373132 0.084910 -0.436577  
 C -2.770535 2.825546 -0.607212  
 H -1.951118 2.713722 -1.323868  
 C -6.001788 -0.035092 2.032434  
 H -6.132987 -1.104679 2.246838  
 C -7.333127 0.488906 1.458088  
 H -7.262200 1.556512 1.216337  
 H -7.608815 -0.043322 0.540589  
 H -8.145727 0.363040 2.184082  
 C -5.654940 0.662530 3.360279  
 H -6.417667 0.443180 4.117588  
 H -4.679149 0.328948 3.724968  
 H -5.617607 1.752539 3.243144  
 C -2.999633 -2.276624 -1.355675  
 H -2.144042 -2.037670 -1.997711  
 C -2.565879 -3.407602 -0.402466  
 H -2.162669 -4.253177 -0.972533  
 H -1.798736 -3.068044 0.303099  
 H -3.411823 -3.779705 0.187321  
 C -4.134906 -2.756526 -2.283455  
 H -3.812893 -3.629132 -2.864817  
 H -5.017748 -3.049379 -1.702852  
 H -4.436598 -1.966520 -2.977768  
 C -2.200704 3.554880 0.624980  
 H -1.712301 4.487595 0.320480  
 H -2.988463 3.807541 1.344355  
 H -1.462836 2.935704 1.146223  
 C -3.855668 3.676799 -1.297312  
 H -4.700185 3.862281 -0.623198  
 H -3.447772 4.649532 -1.597817  
 H -4.243680 3.172049 -2.188187  
 O -3.885659 0.609704 -3.372884  
 O 1.630929 0.635925 -3.072115  
 C -4.561300 0.816860 -4.603652  
 H -4.335378 0.022849 -5.327791  
 H -5.625548 0.793912 -4.364085  
 H -4.309092 1.790894 -5.043455  
 C 2.453360 0.809707 -4.216900  
 H 2.268155 1.777927 -4.699247  
 H 3.480110 0.777958 -3.849392  
 H 2.302028 0.003013 -4.945184  
 C 1.619868 -1.203177 -0.910527  
 C 2.999394 -1.074002 -0.719598  
 C 1.120410 -2.415428 -1.398835  
 C 3.854563 -2.139999 -1.005480  
 H 3.420127 -0.145157 -0.353830  
 C 1.981781 -3.471960 -1.703011  
 H 0.052393 -2.548137 -1.538033  
 C 3.354956 -3.344592 -1.502543  
 H 4.022970 -4.166717 -1.728353  
 C 1.328113 1.634804 -0.106599

C 2.189299 1.707972 1.000651  
C 1.114133 2.791642 -0.867866  
C 2.844389 2.906251 1.304668  
H 2.353332 0.840457 1.631346  
C 1.745842 3.989819 -0.537038  
H 0.452184 2.766763 -1.724302  
C 2.622603 4.053747 0.545061  
H 3.129204 4.979502 0.788353  
Pd -0.988811 -0.550679 1.349924  
C 0.479132 -1.051046 2.720747  
C 1.611378 -1.796850 2.347993  
C 0.594886 -0.104911 3.760909  
C 2.846848 -1.553356 2.958013  
H 1.527067 -2.561241 1.582751  
C 1.831948 0.117111 4.366875  
H -0.281778 0.446189 4.087094  
C 2.969594 -0.595283 3.967613  
H 3.718924 -2.110606 2.622539  
H 1.908269 0.866326 5.151043  
H 3.931175 -0.404747 4.434167  
O -2.458566 -0.828898 2.974061  
C -2.114027 -1.903809 3.568017  
N -0.968773 -2.482778 3.282435  
C -0.460620 -3.627730 4.005684  
H 0.593901 -3.755710 3.737650  
H -0.511069 -3.516355 5.099733  
H -0.986053 -4.554921 3.731953  
C -3.052928 -2.472561 4.619486  
H -2.628475 -2.320312 5.620105  
H -4.019891 -1.970151 4.569115  
H -3.195430 -3.550545 4.487598  
C 3.766624 2.965414 2.497615  
C 1.426645 5.231291 -1.326593  
C 5.324742 -2.009678 -0.704908  
C 1.392477 -4.742149 -2.258641  
F 2.418147 6.143766 -1.260059  
F 0.302884 5.834899 -0.868420  
F 1.212919 4.953600 -2.632681  
F 4.572846 1.885316 2.556693  
F 4.558757 4.060596 2.462917  
F 3.076886 3.013820 3.658362  
F 6.073204 -2.805145 -1.499207  
F 5.760440 -0.742199 -0.869006  
F 5.599426 -2.359696 0.574136  
F 2.313663 -5.717114 -2.393951  
F 0.838936 -4.535834 -3.475975  
F 0.408216 -5.219660 -1.462351



**Reference 32:** Gaussian 03, Revision D.01, Frisch, M. J.; Trucks, G. W.; Schlegel, H. B.; Scuseria, G. E.; Robb, M. A.; Cheeseman, J. R.; Montgomery, Jr., J. A.; Vreven, T.; Kudin, K. N.; Burant, J. C.; Millam, J. M.; Iyengar, S. S.; Tomasi, J.; Barone, V.; Mennucci, B.; Cossi, M.; Scalmani, G.; Rega, N.; Petersson, G. A.; Nakatsuji, H.; Hada, M.; Ehara, M.; Toyota, K.; Fukuda, R.; Hasegawa, J.; Ishida, M.; Nakajima, T.; Honda, Y.; Kitao, O.; Nakai, H.; Klene, M.; Li, X.; Knox, J. E.; Hratchian, H. P.; Cross, J. B.; Bakken, V.; Adamo, C.; Jaramillo, J.; Gomperts, R.; Stratmann, R. E.; Yazyev, O.; Austin, A. J.; Cammi, R.; Pomelli, C.; Ochterski, J. W.; Ayala, P. Y.; Morokuma, K.; Voth, G. A.; Salvador, P.; Dannenberg, J. J.; Zakrzewski, V. G.; Dapprich, S.; Daniels, A. D.; Strain, M. C.; Farkas, O.; Malick, D. K.; Rabuck, A. D.; Raghavachari, K.; Foresman, J. B.; Ortiz, J. V.; Cui, Q.; Baboul, A. G.; Clifford, S.; Cioslowski, J.; Stefanov, B. B.; Liu, G.; Liashenko, A.; Piskorz, P.; Komaromi, I.; Martin, R. L.; Fox, D. J.; Keith, T.; Al-Laham, M. A.; Peng, C. Y.; Nanayakkara, A.; Challacombe, M.; Gill, P. M. W.; Johnson, B.; Chen, W.; Wong, M. W.; Gonzalez, C.; and Pople, J. A.; Gaussian, Inc., Wallingford CT, 2004.

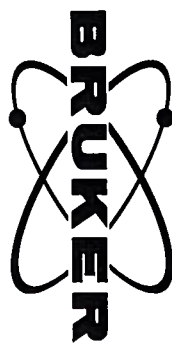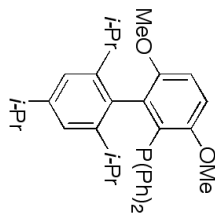

Current Data Parameters  
NAME jdh-2-282  
EXPNO 1  
PROCNO 1

F2 - Acquisition Parameters  
Date\_ 20080930  
Time 20.01  
INSTRUM spect  
PROBHD 5 mm QNP 1H/13  
PULPROG zg30  
TD 65536  
SOLVENT CDCl3  
NS 16  
DS 2  
SMH 8278.146 Hz  
FIDRES 0.126314 Hz  
AQ 3.9584243 sec  
RG 256  
DW 60.400 usec  
DE 6.00 usec  
TE 291.2 K  
D1 1.00000000 sec  
TD0 1

==== CHANNEL f1 =====  
NUC1 1H  
P1 13.88 usec  
PL1 0.00 dB  
SF01 400.1324710 MHz  
F2 - Processing parameters  
SI 65536  
SF 400.1300094 MHz  
WDW no  
SSB 0  
LB 0.00 Hz  
GB 0  
PC 1.00

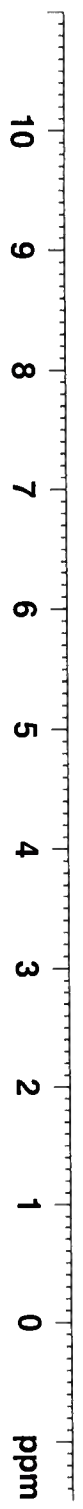

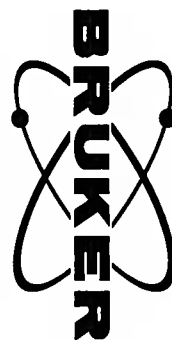

Current Data Parameters  
 NAME jdh-2-282-C13  
 EXPNO 1  
 PROCNO 1

F2 - Acquisition Parameters

Date\_ 20080929  
 Time 16.34  
 INSTRUM spect  
 PROBHD 5 mm BBO BB-1H  
 PULPROG zgpg30  
 TD 65536  
 SOLVENT CDCl3  
 NS 129  
 DS 2  
 SMH 23980.814 Hz  
 FIDRES 0.365918 Hz  
 AQ 1.3664756 sec  
 RG 5160.6  
 DW 20.850 usec  
 DE 6.00 usec  
 TE 300.0 K  
 D1 2.00000000 sec  
 d11 0.03000000 sec  
 DELTA 1.89999998 sec  
 TD0 1

==== CHANNEL f1 =====  
 NUC1 13C  
 P1 8.75 usec  
 PL1 -3.00 dB  
 SFO1 100.6228298 MHz

==== CHANNEL f2 =====  
 CPDPRG2 waltz16  
 NUC2 1H  
 PCPD2 90.00 usec  
 PL2 -1.00 dB  
 PL12 14.52 dB  
 PL13 18.00 dB  
 SFO2 400.1316005 MHz

F2 - Processing parameters  
 SI 65536  
 SF 100.612768 MHz  
 WDW no  
 SSB 0  
 LB 0.00 Hz  
 GB 0  
 PC 1.40

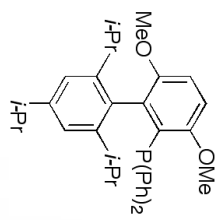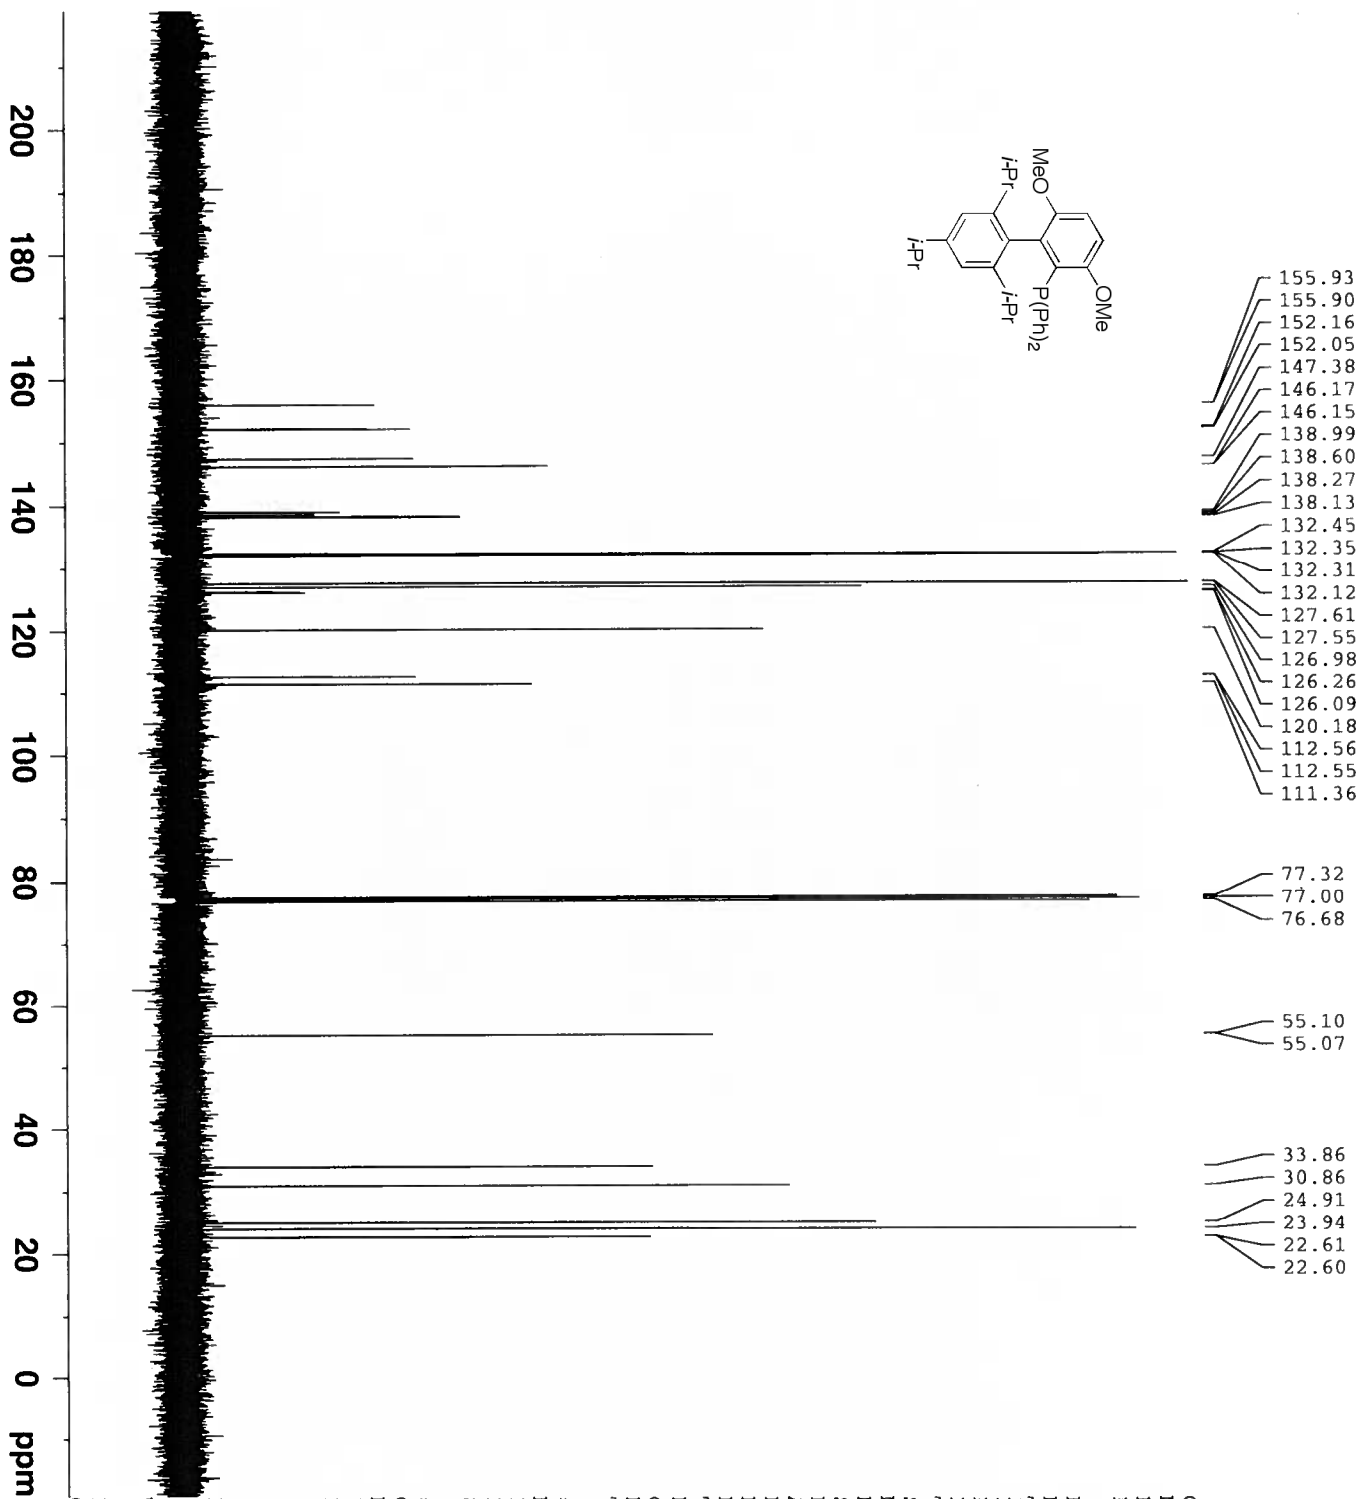

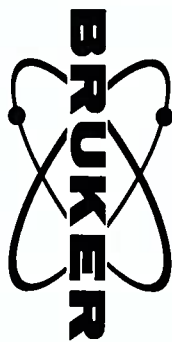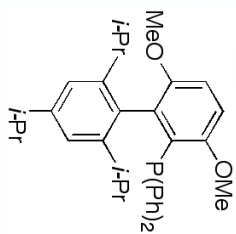

9.000  
8.999  
8.998  
8.997  
8.996  
8.995  
8.994  
8.993  
8.992  
8.991  
8.990  
8.989  
8.988  
8.987  
8.986  
8.985  
8.984  
8.983  
8.982  
8.981  
8.980

Current Data Parameters  
 NAME jdh-2-282-p31  
 EXPNO 1  
 PROCNO 1

F2 - Acquisition Parameters  
 Date\_ 20080930  
 Time 20.03  
 INSTRUM spect  
 PROBHD 5 mm QNP 1H/13  
 PULPROG zgpg30  
 TD 65536  
 SOLVENT Acetone  
 NS 16  
 DS 4  
 SWH 64935.066 Hz  
 FIDRES 0.990830 Hz  
 AQ 0.5046772 sec  
 RG 6502  
 DW 7.700 usec  
 DE 6.00 usec  
 TE 291.2 K  
 D1 2.00000000 sec  
 d11 0.03000000 sec  
 DELTA 1.899999998 sec  
 TD0 1

==== CHANNEL f1 =====  
 NUC1 31P  
 P1 9.25 usec  
 PL1 3.00 dB  
 SFO1 161.9674940 MHz

==== CHANNEL f2 =====  
 CPDPRG2 waitz16  
 NUC2 1H  
 PCPDD2 90.00 usec  
 PL2 0.00 dB  
 PL12 16.10 dB  
 PL13 19.00 dB  
 SFO2 400.1316000 MHz

F2 - Processing parameters  
 SI 65536  
 SF 161.9755024 MHz  
 WDW no  
 SSB 0  
 LB 0.00 Hz  
 GB 0  
 PC 1.40

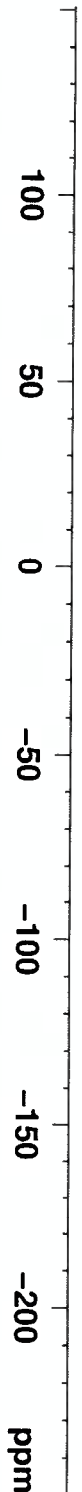

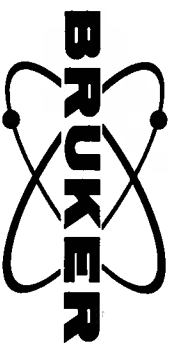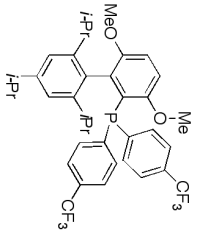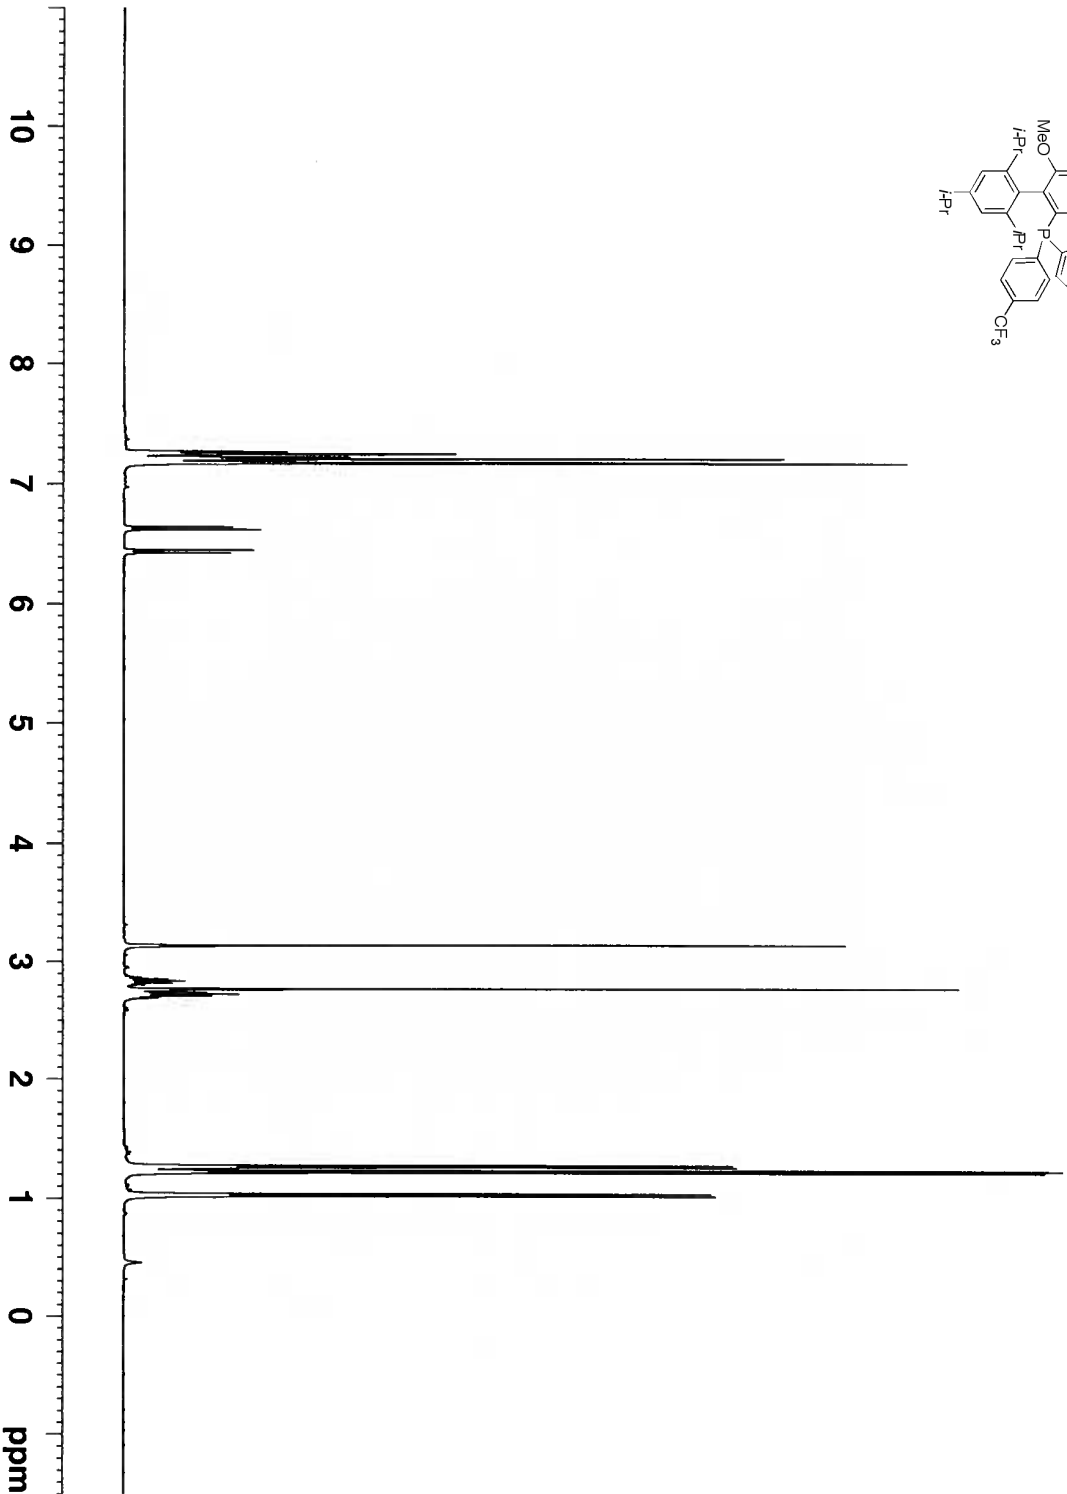

Current Data Parameters  
 NAME jdh-1-183  
 EXPNO 1  
 PROCNO 1

F2 - Acquisition Parameters  
 Date\_ 20080909  
 Time 19.41  
 INSTRUM spect  
 PROBHD 5 mm QNP 1H/13  
 PULPROG zg30  
 TD 65536  
 SOLVENT CDC13  
 NS 16  
 DS 2  
 SMH 8278.146 Hz  
 FIDRES 0.126314 Hz  
 AQ 3.9584243 sec  
 RG 181  
 DW 60.400 usec  
 DE 6.00 usec  
 TE 291.2 K  
 D1 1.00000000 sec  
 TD0 1

==== CHANNEL f1 =====  
 NUC1 1H  
 P1 13.88 usec  
 PL1 0.00 dB  
 SFO1 400.1324710 MHz  
 F2 - Processing parameters  
 SI 65536  
 SF 400.1300220 MHz  
 WDW no  
 SSB 0  
 LB 0.00 Hz  
 GB 0  
 PC 1.00

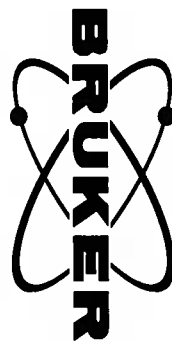

Current Data Parameters  
 NAME jdh-2-183-C13  
 EXPNO 1  
 PROCNO 1

F2 - Acquisition Parameters

Date\_ 20080909  
 Time 22.05  
 INSTRUM spect  
 PROBHD 5 mm QNP 1H/13  
 PULPROG zgpg30  
 TD 65536  
 SOLVENT C6D6  
 NS 1024  
 DS 4  
 SWH 23980.814 Hz  
 FIDRES 0.365918 Hz  
 AQ 1.3664756 sec  
 RG 1625.5  
 DW 20.850 usec  
 DE 6.00 usec  
 TE 293.2 K  
 D1 2.00000000 sec  
 d11 0.03000000 sec  
 DELTA 1.89999998 sec  
 TD0 1

==== CHANNEL f1 =====

NUC1 13C  
 P1 9.38 usec  
 PL1 0.00 dB  
 SFO1 100.6228298 MHz

==== CHANNEL f2 =====

CPDPRG2 waltz16  
 NUC2 1H  
 PCPD2 90.00 usec  
 PL2 0.00 dB  
 PL12 16.10 dB  
 PL13 19.00 dB  
 SFO2 400.1316005 MHz

F2 - Processing parameters

SI 32768  
 SF 100.6127690 MHz  
 WDW no  
 SSB 0  
 LB 0.00 Hz  
 GB 0  
 PC 1.40

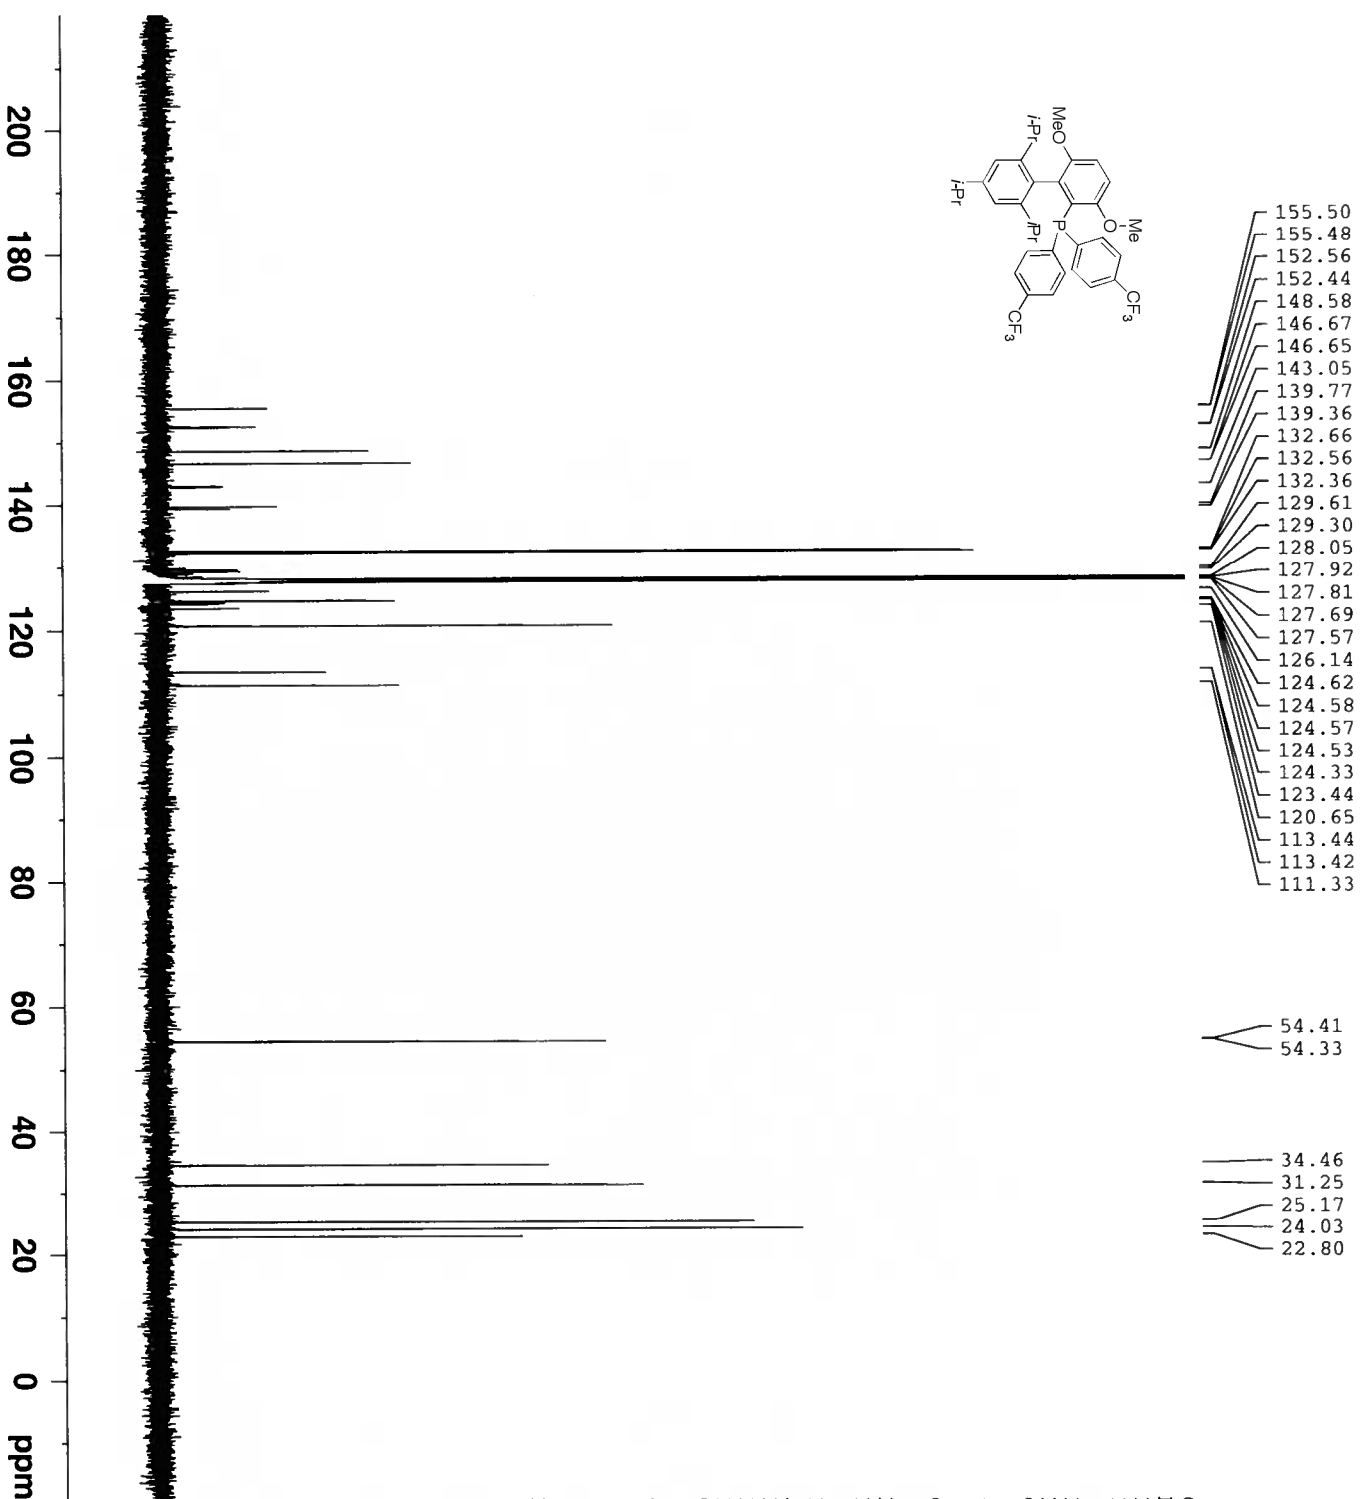

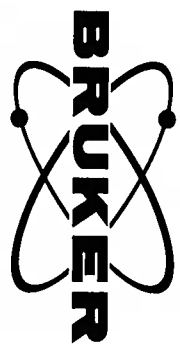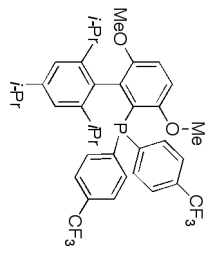

16.96  
16.97  
16.98

Current Data Parameters  
 NAME jdh-1-183-p31  
 EXFNO 1  
 PROCNO 1

F2 - Acquisition Parameters  
 Date\_ 20080909  
 Time 19.43

INSTRUM spect  
 PROBHID 5 mm QNP 1H/13  
 PULPROG zgpg30  
 TD 65536  
 SOLVENT Acetone  
 NS 16  
 DS 4

SWH 64935.066 Hz  
 FIDRES 0.990830 Hz  
 AQ 0.5046772 sec  
 RG 3649.1  
 DW 7.700 usec  
 DE 6.00 usec  
 TE 291.2 K

D1 2.00000000 sec  
 d11 0.03000000 sec  
 DELTA 1.89999998 sec  
 TD0 1

==== CHANNEL f1 =====  
 NUC1 31P  
 P1 9.25 usec  
 PL1 3.00 dB  
 SF01 161.9674940 MHz

==== CHANNEL f2 =====  
 CPDPRG2 waltz16  
 NUC2 1H  
 PCPD2 90.00 usec  
 PL2 0.00 dB  
 PL12 16.10 dB  
 PL13 19.00 dB  
 SF02 400.1316000 MHz

F2 - Processing parameters  
 SI 65536  
 SF 161.9755024 MHz  
 MDM no  
 SSB 0  
 LB 0.00 Hz  
 GB 0  
 PC 1.40

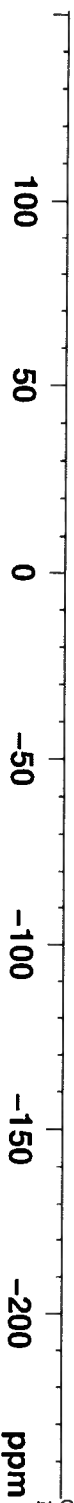

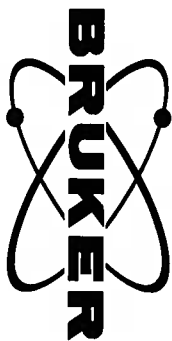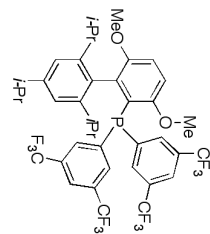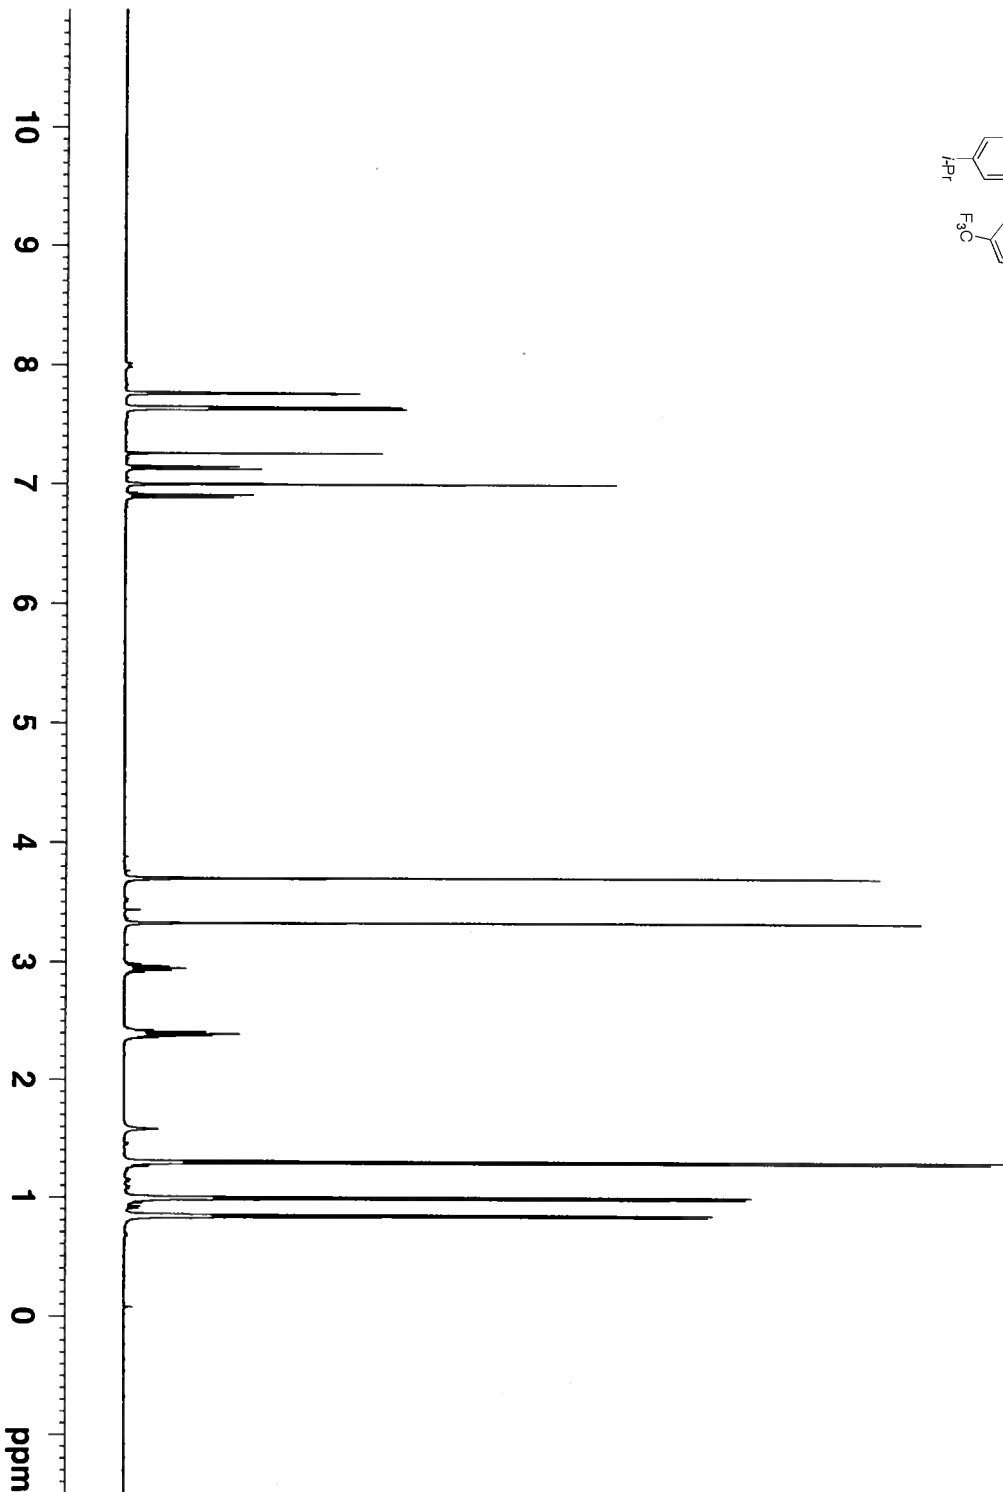

Current Data Parameters  
 NAME jdh-2-233-H1  
 EXPNO 1  
 PROCNO 1

F2 - Acquisition Parameters  
 Date\_ 20080906  
 Time 17.02

INSTRUM spect  
 PROBHD 5 mm QNP 1H/13  
 PULPROG zg30  
 TD 65536  
 SOLVENT CDCl3  
 NS 16  
 DS 2

SWH 8278.146 Hz  
 FIDRES 0.126314 Hz  
 AQ 3.9584243 sec  
 RG 287.4  
 DW 60.400 usec  
 DE 6.00 usec  
 TE 292.2 K  
 D1 1.00000000 sec  
 TD0 1

==== CHANNEL f1 =====  
 NUC1 1H  
 P1 13.88 usec  
 PL1 0.00 dB  
 SF01 400.1324710 MHz

F2 - Processing parameters  
 SI 65536  
 SF 400.1300095 MHz  
 WDW no  
 SSB 0  
 LB 0.00 Hz  
 GB 0  
 PC 1.00



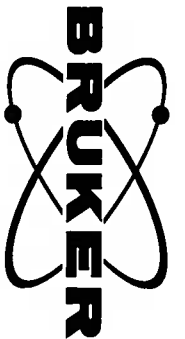

Current Data Parameters  
 NAME jdh-2-233-C13  
 EXPNO 1  
 PROCNO 1

F2 - Acquisition Parameters  
 Date\_ 20080906  
 Time 14.23  
 INSTRUM spect  
 PROBHD 5 mm QNP 1H/13  
 PULPROG zgpg30  
 TD 65536  
 SOLVENT CDCl3  
 NS 256  
 DS 4  
 SWH 23980.814 Hz  
 FIDRES 0.365918 Hz  
 AQ 1.3664756 sec  
 RG 1625.5  
 DW 20.850 usec  
 DE 6.00 usec  
 TE 293.2 K  
 D1 2.00000000 sec  
 d11 0.03000000 sec  
 DELTA 1.89999998 sec  
 TD0 1

==== CHANNEL f1 =====  
 NUC1 13C  
 P1 9.38 usec  
 PL1 0.00 dB  
 SFO1 100.6228298 MHz

==== CHANNEL f2 =====  
 CPDPRG2 waltz16  
 NUC2 1H  
 PCPD2 90.00 usec  
 PL2 0.00 dB  
 PL12 16.10 dB  
 PL13 19.00 dB  
 SFO2 400.1316005 MHz

F2 - Processing parameters  
 SI 32768  
 SF 100.6127701 MHz  
 WDW no  
 SSB 0  
 LB 0.00 Hz  
 GB 0  
 PC 1.40

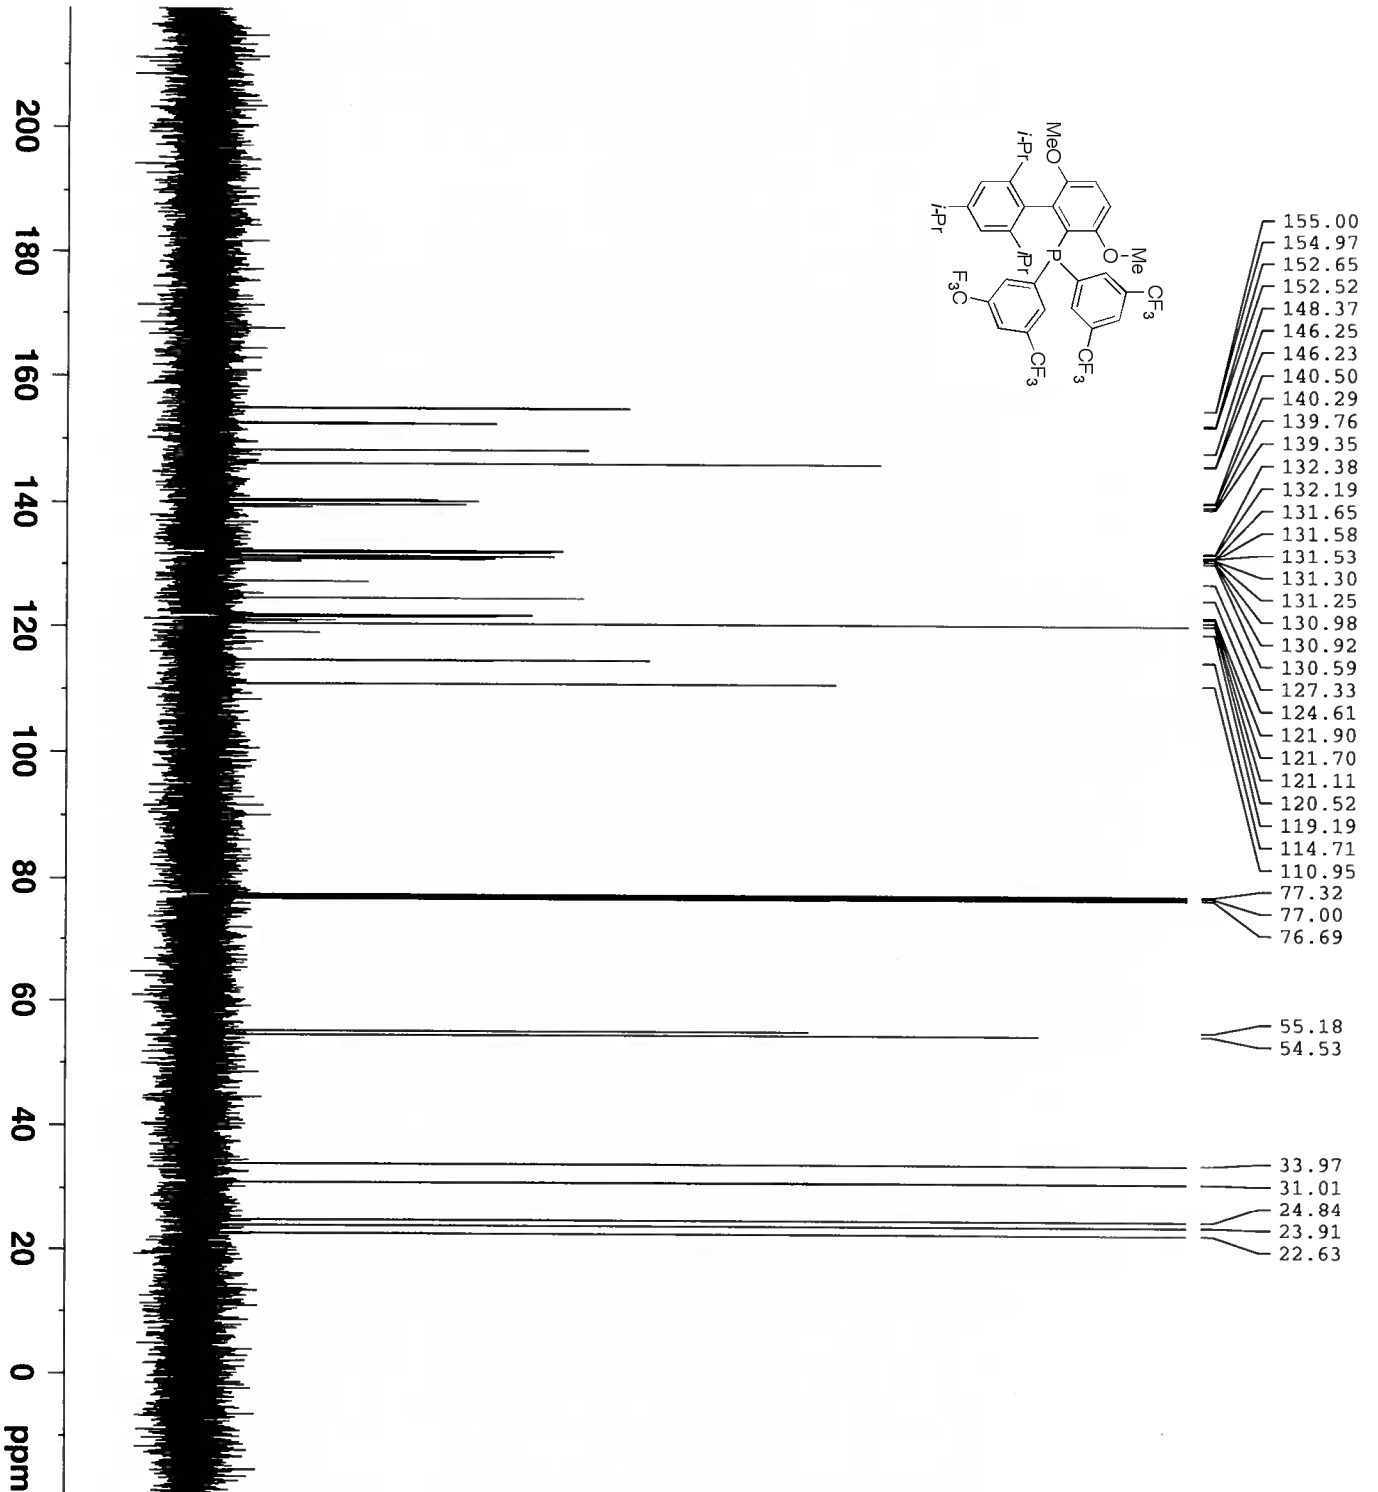

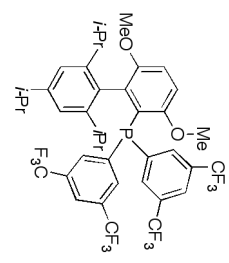

15.54

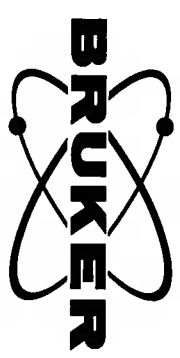

Current Data Parameters  
 NAME jdh-2-233-p31  
 EXPNO 1  
 PROCNO 1

F2 - Acquisition Parameters  
 Date\_ 20080906  
 Time 14.07  
 INSTRUM spect  
 PROBHD 5 mm QNP 1H/13  
 PULPROG zgpg30  
 TD 65536  
 SOLVENT Acetone  
 NS 16  
 DS 4  
 SWH 64935.066 Hz  
 FIDRES 0.990830 Hz  
 AQ 0.5046772 sec  
 RG 3251  
 DW 7.700 usec  
 DE 6.00 usec  
 TE 292.2 K  
 D1 2.00000000 sec  
 d11 0.03000000 sec  
 DELTA 1.89999998 sec  
 TD0 1

==== CHANNEL f1 =====  
 NUC1 31P  
 P1 9.25 usec  
 PL1 3.00 dB  
 SFO1 161.9674940 MHz

==== CHANNEL f2 =====  
 CPDPRG2 waltz16  
 NUC2 1H  
 PCPD2 90.00 usec  
 PL2 0.00 dB  
 PL12 16.10 dB  
 PL13 19.00 dB  
 SFO2 400.1316000 MHz

F2 - Processing parameters  
 SI 65536  
 SF 161.9755024 MHz  
 WDW no  
 SSB 0  
 LB 0.00 Hz  
 GB 0  
 PC 1.40

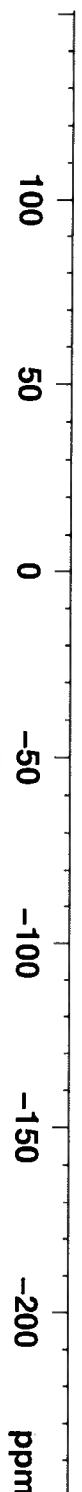

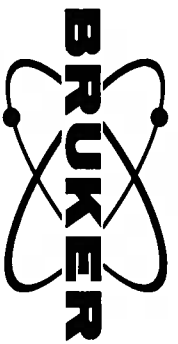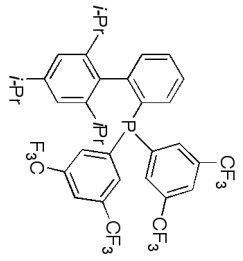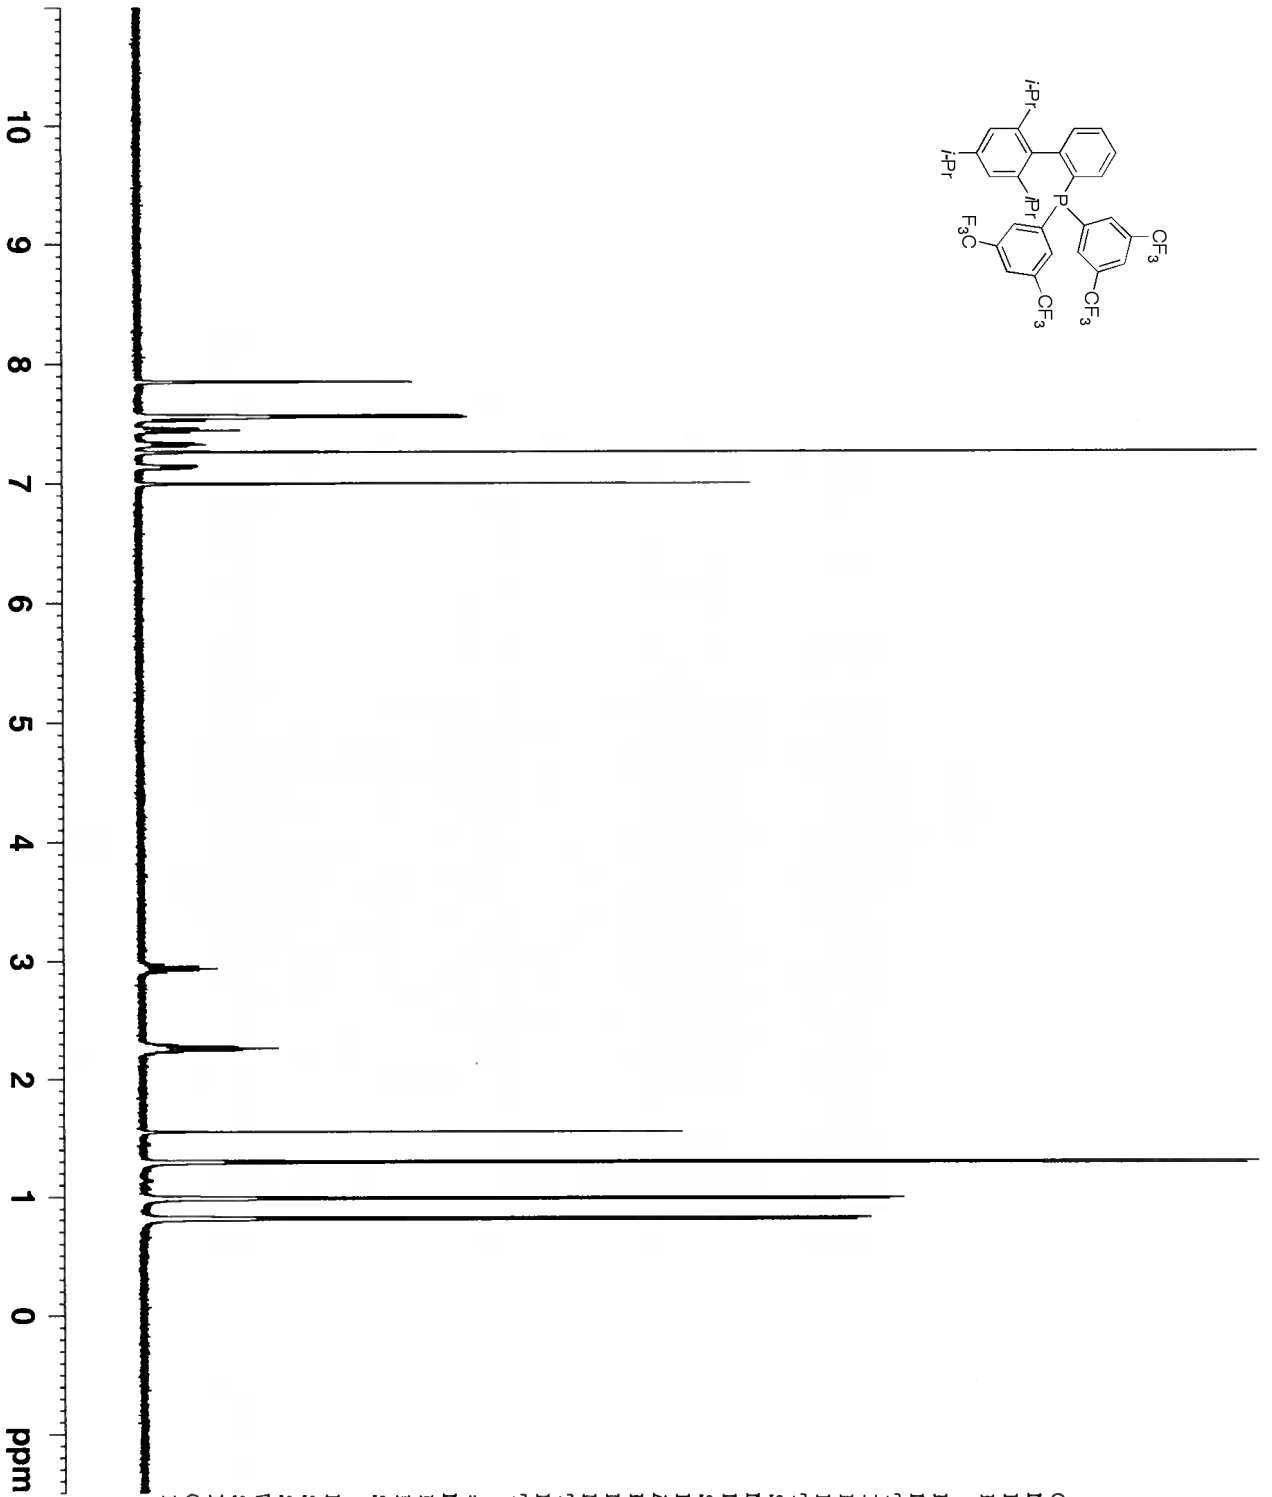

Current Data Parameters  
 NAME jdh-1-253  
 EXPNO 1  
 PROCNO 1

F2 - Acquisition Parameters  
 Date\_ 20080923  
 Time 12.19  
 INSTRUM spect  
 PROBHD 5 mm QNP 1H/13  
 PULPROG zg30  
 TD 65536  
 SOLVENT CDCl3  
 NS 16  
 DS 2  
 SWH 8278.146 Hz  
 FIDRES 0.126314 Hz  
 AQ 3.9584243 sec  
 RG 287.4  
 DW 60.400 usec  
 DE 6.00 usec  
 TE 292.2 K  
 D1 1.00000000 sec  
 TD0 1

==== CHANNEL f1 =====  
 NUC1 1H  
 P1 13.88 usec  
 PL1 0.00 dB  
 SFO1 400.1324710 MHz  
 F2 - Processing parameters  
 SI 65536  
 SF 400.1300093 MHz  
 WDW no  
 SSB 0  
 LB 0.00 Hz  
 GB 0  
 PC 1.00

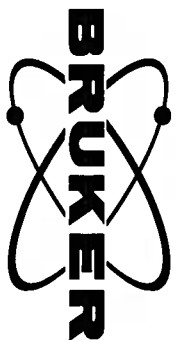

Current Data Parameters  
 NAME jdh-2-253  
 EXPNO 1  
 PROCNO 1

F2 - Acquisition Parameters

Date\_ 20080923  
 Time 17.21  
 INSTRUM spect  
 PROBHD 5 mm BBO BB-1H  
 PULPROG zgpg30  
 TD 65536  
 SOLVENT CDC13  
 NS 256  
 DS 2  
 SWH 23980.814 Hz  
 FIDRES 0.365918 Hz  
 AQ 1.3664756 sec  
 RG 16384  
 DW 20.850 usec  
 DE 6.00 usec  
 TE 293.2 K  
 D1 2.00000000 sec  
 d11 0.03000000 sec  
 DELTA 1.89999998 sec  
 TD0 1

==== CHANNEL f1 =====

NUC1 13C  
 P1 8.75 usec  
 PL1 -3.00 dB  
 SFO1 100.6228298 MHz

==== CHANNEL f2 =====

CPDPRG2 waltz16  
 NUC2 1H  
 PCPD2 90.00 usec  
 PL2 -1.00 dB  
 PL12 14.52 dB  
 PL13 18.00 dB  
 SFO2 400.1316005 MHz

F2 - Processing parameters

SI 65536  
 SF 100.6127719 MHz  
 WDW no  
 SSB 0  
 LB 0.00 Hz  
 GB 0  
 PC 1.40

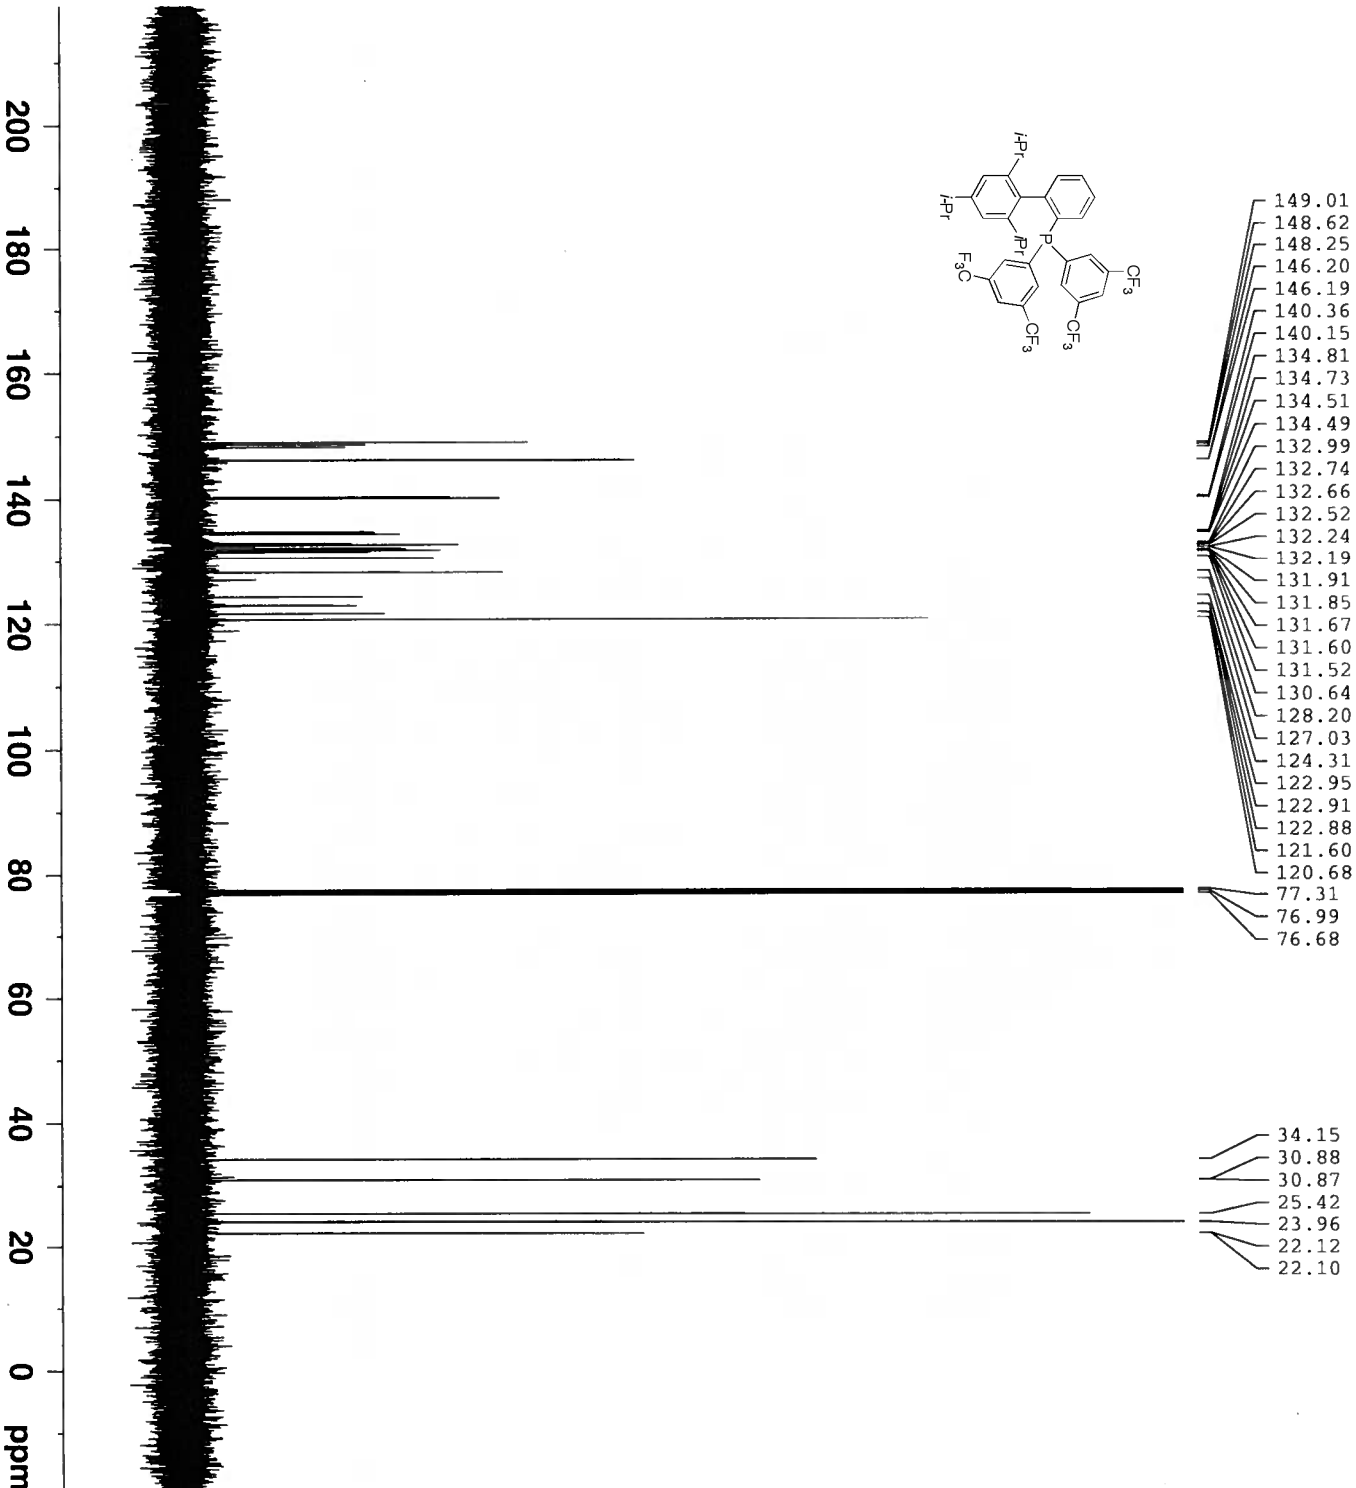

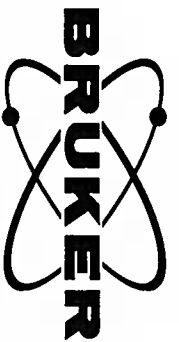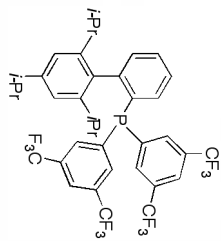

Current Data Parameters  
 NAME jdh-2-253-p31  
 EXPNO 1  
 PROCNO 1

F2 - Acquisition Parameters  
 Date\_ 20080923  
 Time 17.26  
 INSTRUM spect  
 PROBHD 5 mm BBO BB-1H  
 PULPROG zgpg30  
 TD 65536  
 SOLVENT Acetone  
 NS 16  
 DS 4  
 SWH 64935.066 Hz  
 FIDRES 0.990830 Hz  
 AQ 0.5046772 sec  
 RG 22800  
 DW 7.700 usec  
 DE 6.00 usec  
 TE 293.2 K  
 D1 2.00000000 sec  
 d11 0.03000000 sec  
 DELTA 1.89999998 sec  
 TD0 1

==== CHANNEL f1 =====  
 NUC1 31P  
 P1 10.00 usec  
 PL1 0.00 dB  
 SF01 161.9674942 MHz

==== CHANNEL f2 =====  
 CPDPRG2 waltz16  
 NUC2 1H  
 PCPD2 90.00 usec  
 PL2 -1.00 dB  
 PL12 14.52 dB  
 PL13 18.00 dB  
 SF02 400.1316005 MHz

F2 - Processing parameters  
 SI 32768  
 SF 161.9755930 MHz  
 WDW mc  
 SSB 0  
 LB 0.00 Hz  
 GB 0  
 PC 1.40

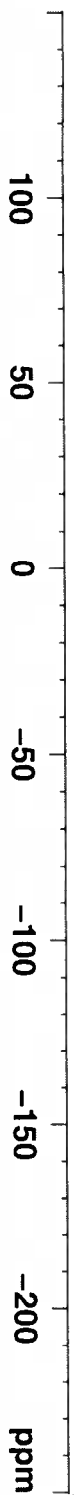

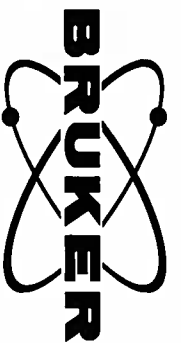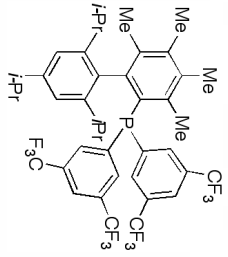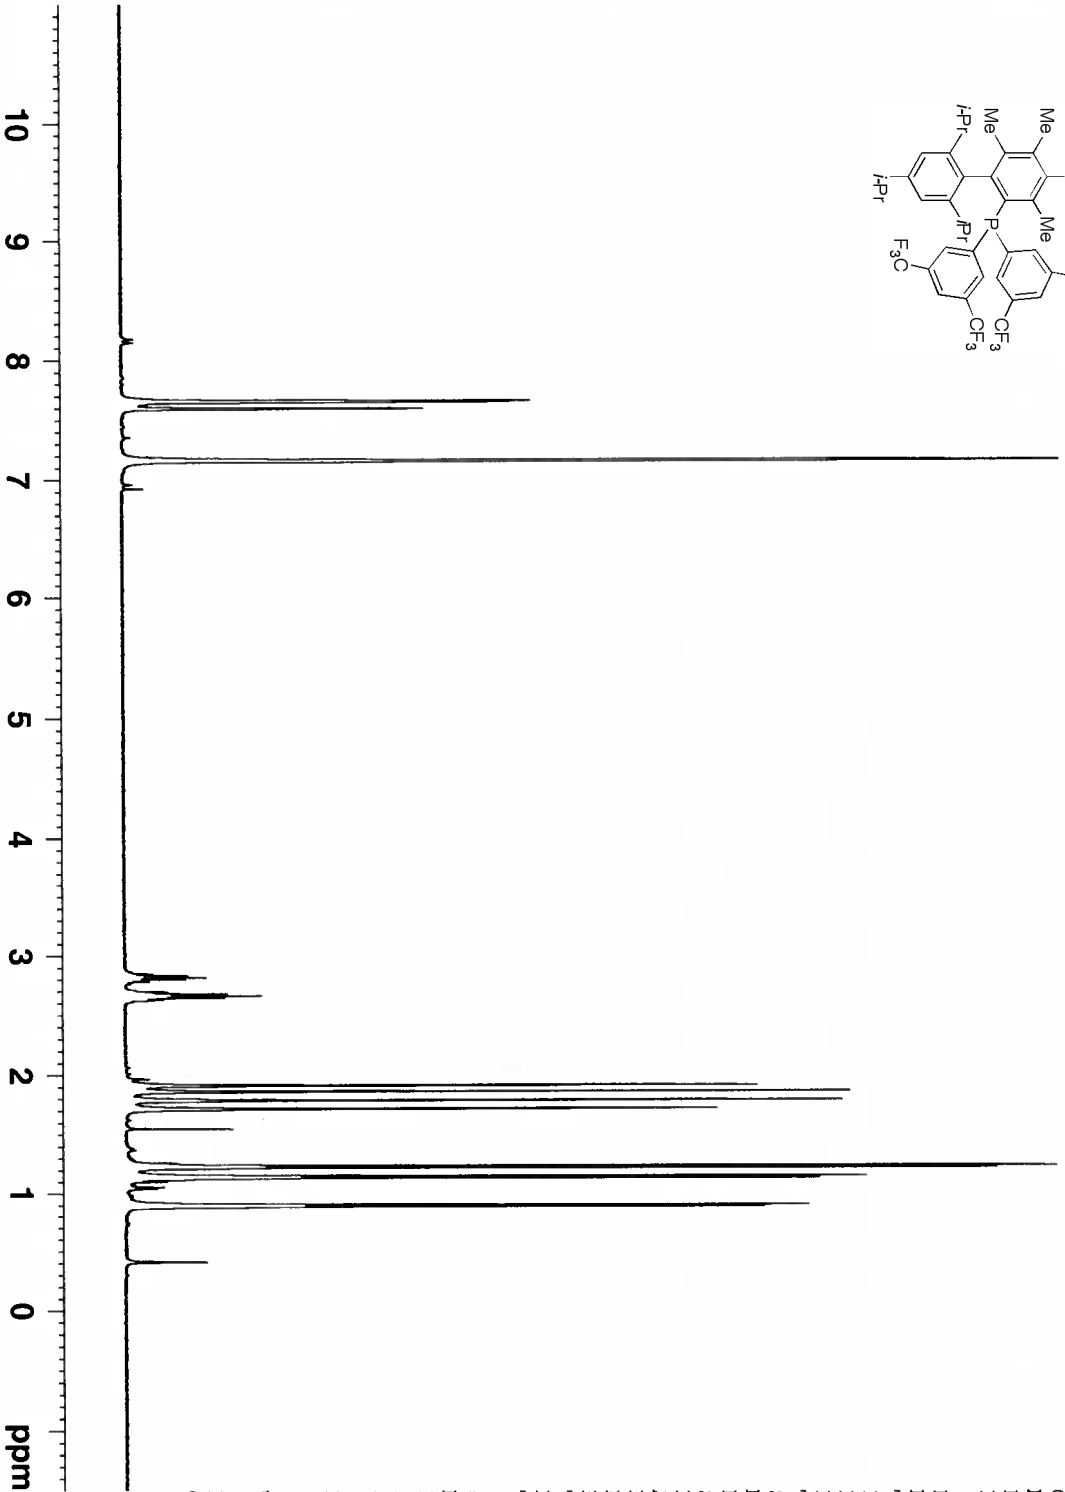

Current Data Parameters  
 NAME jdh-2-286-6  
 EXPNO 1  
 PROCNO 1

F2 - Acquisition Parameters  
 Date\_ 20081008  
 Time 13.09  
 INSTRUM spect  
 PROBHD 5 mm QNP 1H/13  
 PULPROG zg30  
 TD 65536  
 SOLVENT CDCl3  
 NS 16  
 DS 2  
 SWH 8278.146 Hz  
 FIDRES 0.126314 Hz  
 AQ 3.9584243 sec  
 RG 256  
 DW 60.400 usec  
 DE 6.00 usec  
 TE 292.2 K  
 D1 1.00000000 sec  
 TD0 1

==== CHANNEL f1 =====  
 NUC1 1H  
 P1 13.88 usec  
 PL1 0.00 dB  
 SFO1 400.1324710 MHz  
 F2 - Processing parameters  
 SI 65536  
 SF 400.1300282 MHz  
 WDW no  
 SSB 0  
 LB 0.00 Hz  
 GB 0  
 PC 1.00

13C-dcif parameter set

- 148.22
- 147.88
- 147.44
- 145.85
- 145.82
- 141.31
- 141.03
- 140.82
- 138.88
- 138.85
- 136.91
- 136.79
- 135.09
- 134.99
- 131.88
- 131.84
- 131.54
- 131.51
- 130.41
- 130.26
- 126.41
- 126.35
- 124.52
- 121.81
- 121.35
- 120.95

- 77.32
- 77.00
- 76.69

- 33.96
- 30.68
- 24.75
- 23.98
- 23.21
- 22.90
- 19.70
- 19.66
- 17.55
- 17.05

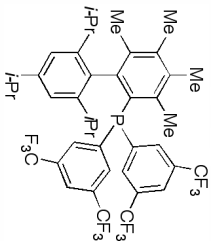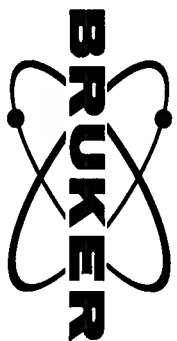

Current Data Parameters  
 NAME jdh-2-286-cl3  
 EXPRNO 1  
 PROCNO 1

F2 - Acquisition Parameters

Date\_ 20081006  
 Time 21.03  
 INSTRUM spect  
 PROBD 5 mm BBO BB-1H  
 PULPROG zgpg30  
 TD 65536  
 SOLVENT CDCl3  
 NS 512  
 DS 2  
 SWH 23980.814 Hz  
 FIDRES 0.365918 Hz  
 AQ 1.3664756 sec  
 RG 8192  
 DW 20.850 usec  
 DE 6.00 usec  
 TE 298.2 K  
 D1 2.00000000 sec  
 d11 0.03000000 sec  
 DELTA 1.89999998 sec  
 TDO 1

==== CHANNEL F1 =====

NUC1 13C  
 P1 8.75 usec  
 PL1 -3.00 dB  
 SFO1 100.6228298 MHz

==== CHANNEL F2 =====

CPDPRG2 waltz16  
 NUC2 1H  
 PCPD2 90.00 usec  
 PL2 -1.00 dB  
 PL12 14.52 dB  
 PL13 18.00 dB  
 SFO2 400.1316005 MHz

F2 - Processing Parameters

SI 65536  
 SF 100.6127681 MHz  
 WDW no  
 SSB 0  
 LB 0.00 Hz  
 GB 0  
 PC 1.40

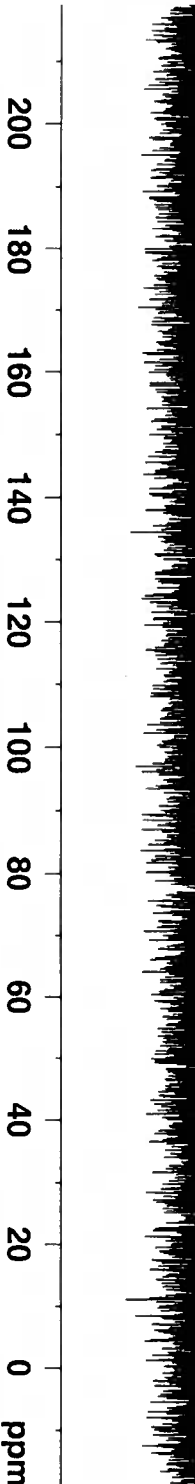

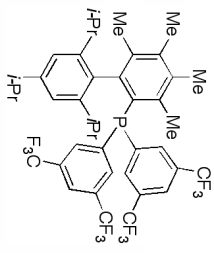

9.50

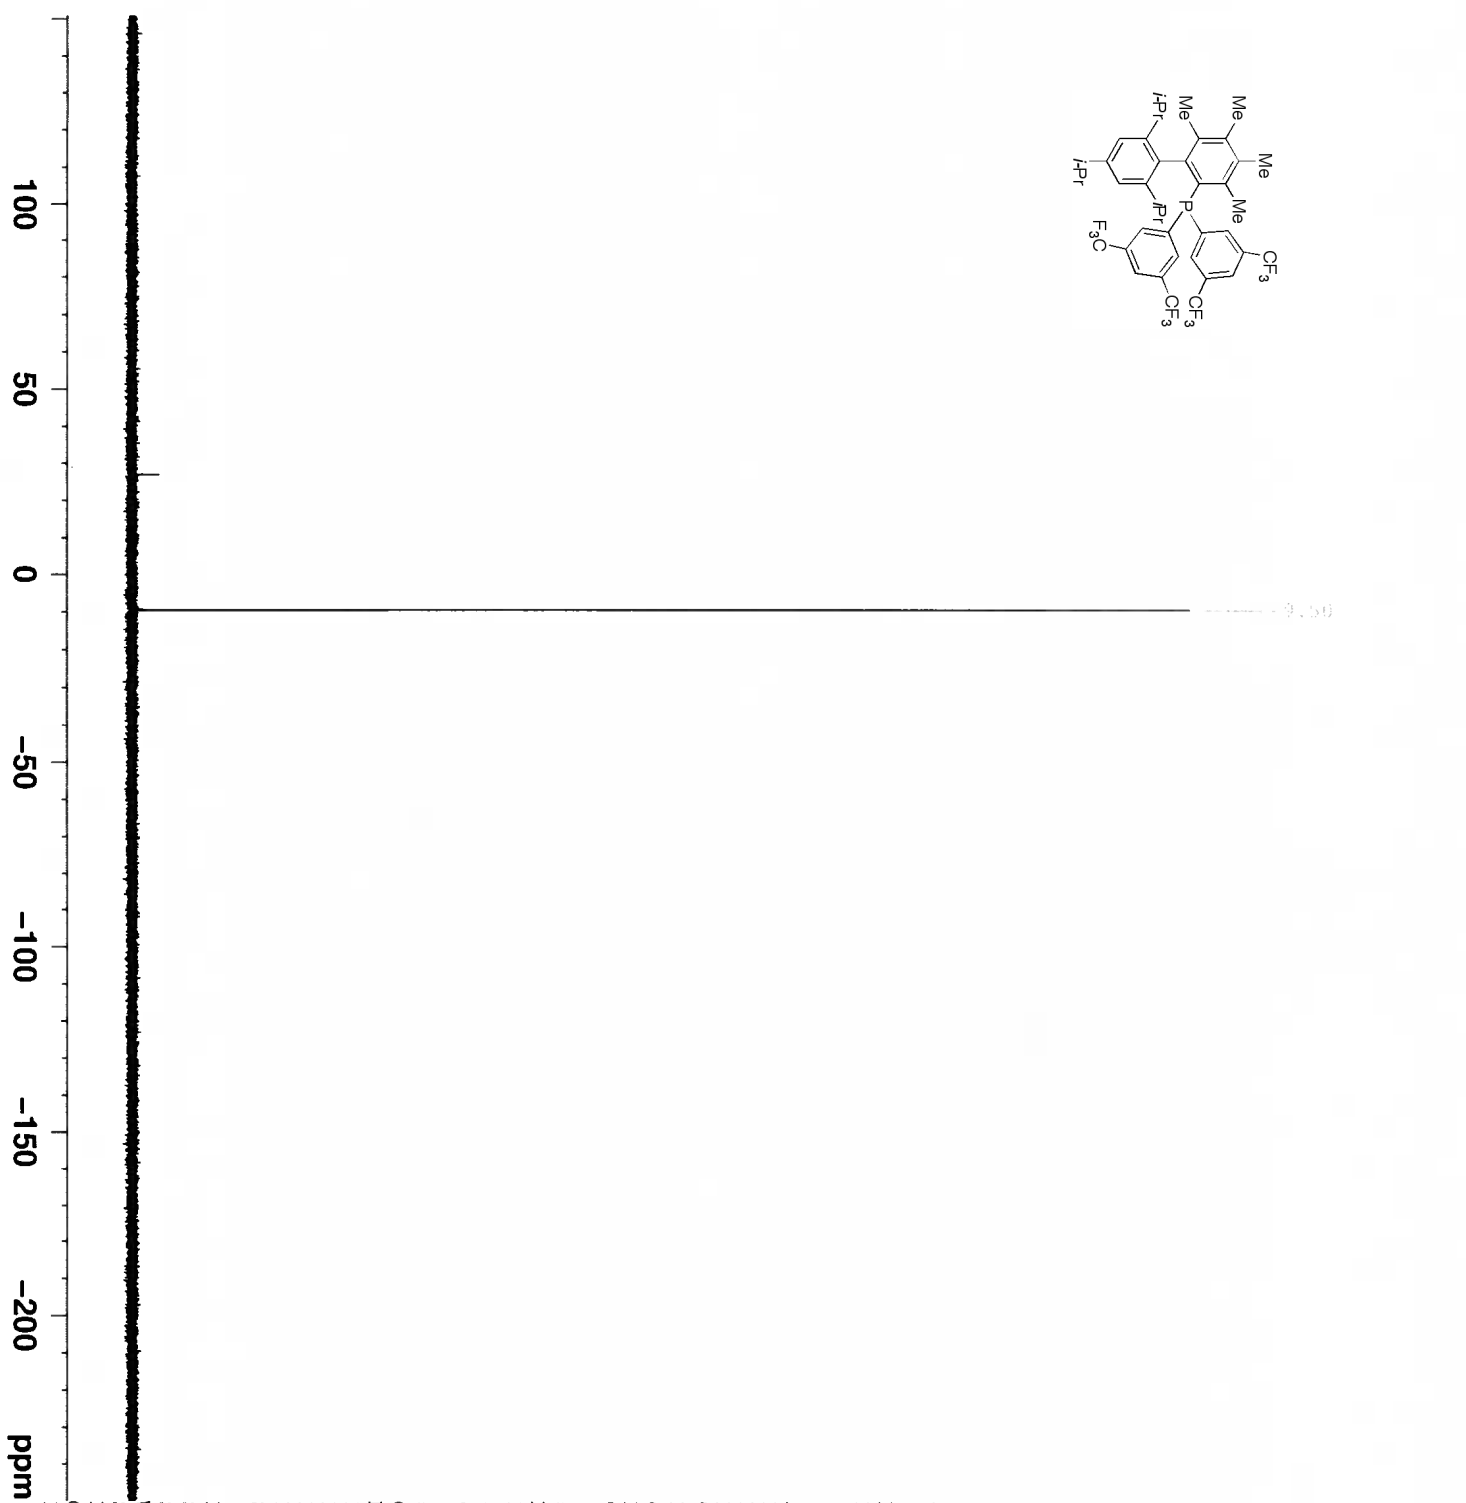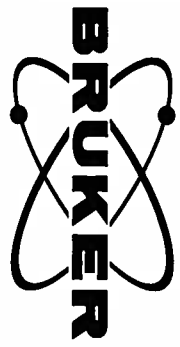

Current Data Parameters  
 NAME jdh-2-286-4-p31  
 EXPNO 1  
 PROCNO 1

F2 - Acquisition Parameters

Date\_ 20081006  
 Time 14.10  
 INSTRUM spect  
 PROBHD 5 mm QNP 1H/13  
 PULPROG zgpg30  
 TD 65536  
 SOLVENT Acetone  
 NS 16  
 DS 4  
 SMH 64935.066 Hz  
 FIDRES 0.990830 Hz  
 AQ 0.5046772 sec  
 RG 7298.2  
 DW 7.700 usec  
 DE 6.00 usec  
 TE 291.2 K  
 D1 2.00000000 sec  
 d11 0.03000000 sec  
 DELTA 1.89999998 sec  
 TD0 1

==== CHANNEL f1 =====

NUC1 31P  
 P1 9.25 usec  
 PL1 3.00 dB  
 SF01 161.9674940 MHz

==== CHANNEL f2 =====

CPDPRG2 waltz16  
 NUC2 1H  
 PCPD2 90.00 usec  
 PL2 0.00 dB  
 PL12 16.10 dB  
 PL13 19.00 dB  
 SF02 400.1316000 MHz

F2 - Processing parameters

SI 65536  
 SF 161.9755024 MHz  
 WDW no  
 SSB 0  
 LB 0.00 Hz  
 GB 0  
 PC 1.40



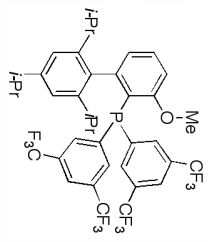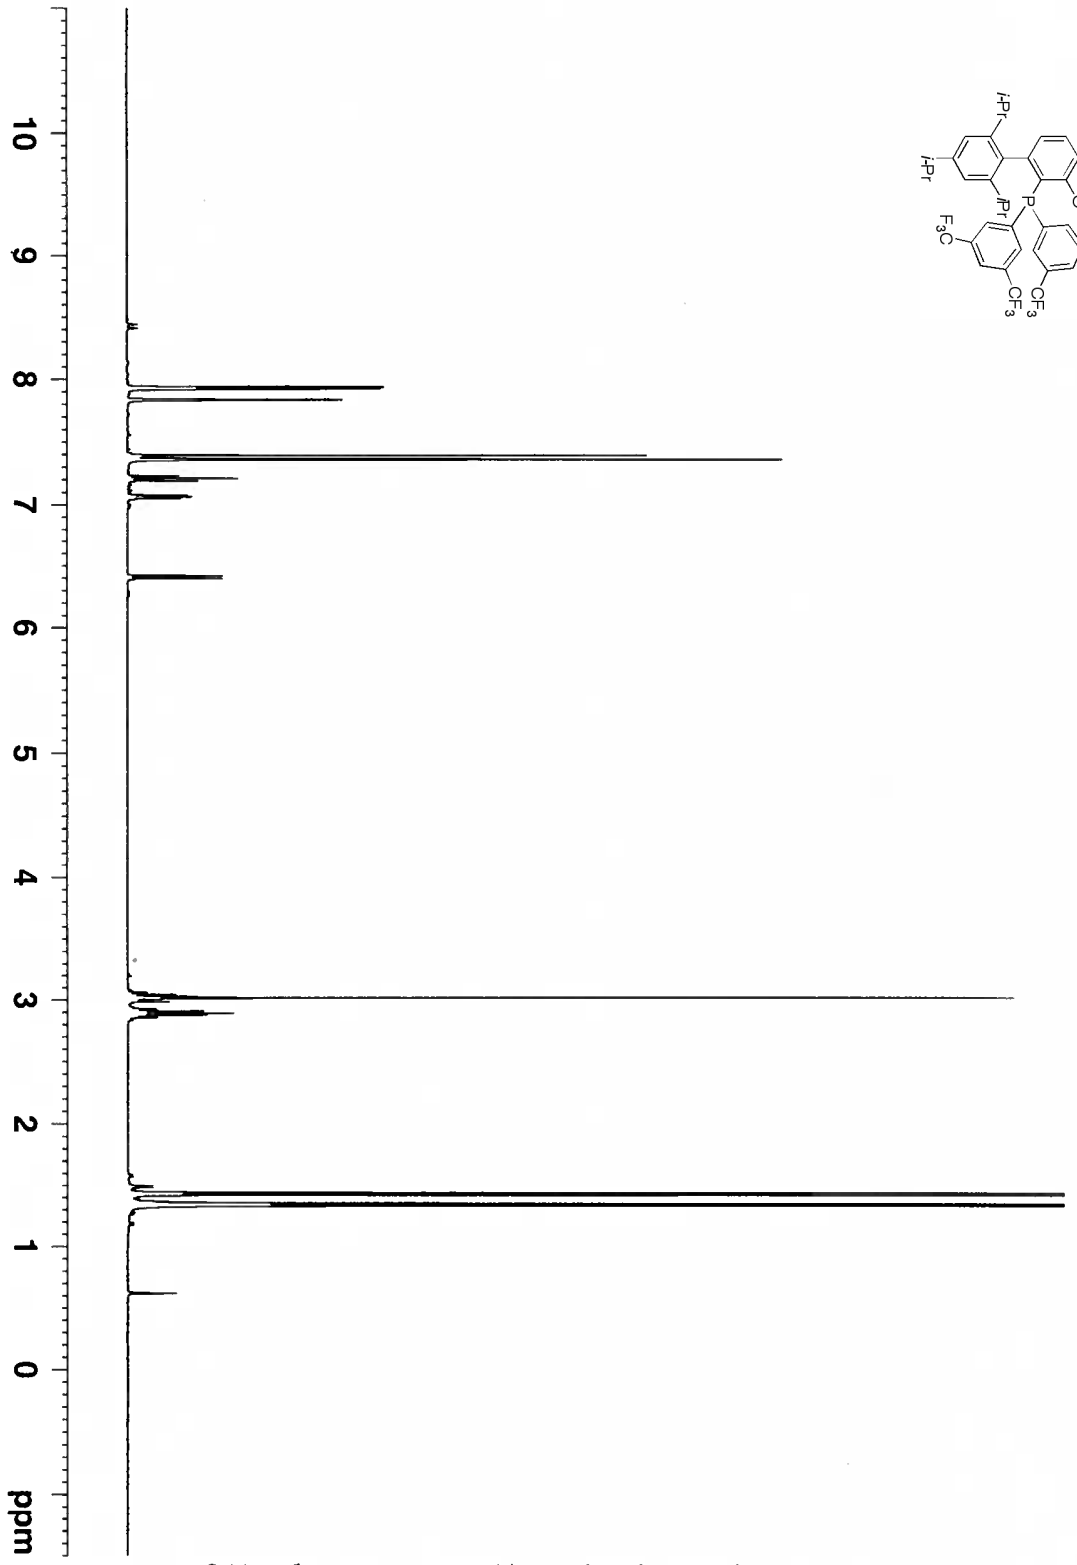

Current Data Parameters  
 NAME jdh-2-216  
 EXPNO 1  
 PROCNO 1

F2 - Acquisition Parameters  
 Date\_ 20080924  
 Time\_ 17.06

INSTRUM spect  
 PROBHD 5 mm BBO BB-1H  
 PULPROG zg30

TD 65536  
 SOLVENT C6D6

NS 16  
 DS 2

SWH 8278.146  
 FIDRES 0.126314

AQ 3.9584243  
 RG 128

DW 60.400  
 DE 6.00

TE 293.2  
 D1 1.00000000

TD0 1  
 S

==== CHANNEL F1 =====  
 NUCL 1H  
 P1 15.07  
 PL1 0.00  
 SFO1 400.1324710

F2 - Processing parameters  
 SI 65536  
 SF 400.1299644  
 WDW no  
 SSB 0  
 LB 0.00  
 GB 0  
 PC 1.00

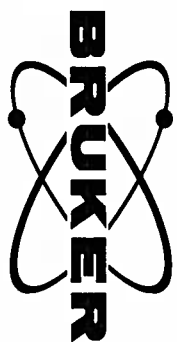

Current Data Parameters  
 NAME jdh-2-216-c13  
 EXPNO 1  
 PROCNO 1

F2 - Acquisition Parameters  
 Date\_ 20080924  
 Time 17.23

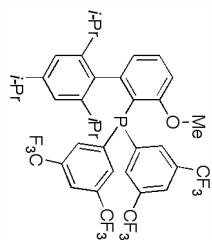

- 161.71
- 161.68
- 151.96
- 151.55
- 149.33
- 146.48
- 146.46
- 140.91
- 140.70
- 136.73
- 136.63
- 133.39
- 132.43
- 131.63
- 131.58
- 131.30
- 131.25
- 128.34
- 128.23
- 128.11
- 127.99
- 127.87
- 127.75
- 125.10
- 124.73
- 122.39
- 121.03
- 110.56

54.08

- 34.70
- 31.27
- 25.66
- 24.24
- 22.90

200 180 160 140 120 100 80 60 40 20 0 ppm

```

===== CHANNEL f1 =====
NUC1      13C
P1        8.75 usec
PL1       -3.00 dB
SF01      100.6228298 MHz

===== CHANNEL f2 =====
CPDPRG2   waltz16
NUC2      1H
PCPD2     90.00 usec
PL2       -1.00 dB
PL12      14.52 dB
PL13      18.00 dB
SF02      400.1316005 MHz

F2 - Processing Parameters
SI        65536
SF        100.6127513 MHz
WDW       no
SSB       0
LB        0.00 Hz
GB        0
PC        1.40
  
```

```

===== CHANNEL f1 =====
NUC1      13C
P1        8.75 usec
PL1       -3.00 dB
SF01      100.6228298 MHz

===== CHANNEL f2 =====
CPDPRG2   waltz16
NUC2      1H
PCPD2     90.00 usec
PL2       -1.00 dB
PL12      14.52 dB
PL13      18.00 dB
SF02      400.1316005 MHz

F2 - Acquisition Parameters
Date_     20080924
Time      17.23
INSTRUM   spect
PROBHD    5 mm BBO BB-1H
PULPROG   zgpg30
TD        65536
SOLVENT   CDC13
NS        256
DS        2
SWH        23980.814 Hz
FIDRES    0.365918 Hz
AQ        1.3664756 sec
RG        8192
DE        20.850 usec
TE        293.2 K
D1        2.00000000 sec
d11       0.03000000 sec
DELTA     1.89999998 sec
TD0       1
  
```

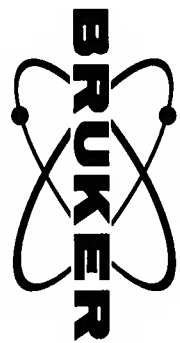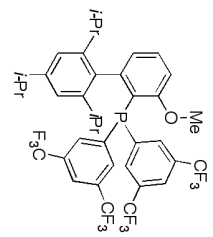

Current Data Parameters  
 NAME jdh-2-216-p31  
 EXPNO 1  
 PROCNO 1

F2 - Acquisition Parameters  
 Date\_ 20080901  
 Time 14.29  
 INSTRUM spect  
 PROBHD 5 mm QNP 1H/13  
 PULPROG zgpg30  
 TD 65536  
 SOLVENT Acetone  
 NS 16  
 DS 4  
 SWH 64935.066 Hz  
 FIDRES 0.990830 Hz  
 AQ 0.5046772 sec  
 RG 6502  
 DW 7.700 usec  
 DE 6.00 usec  
 TE 291.2 K  
 D1 2.00000000 sec  
 d11 0.03000000 sec  
 DELTA 1.89999998 sec  
 TD0 1

==== CHANNEL f1 =====  
 NUC1 31P  
 P1 9.25 usec  
 PL1 3.00 dB  
 SFO1 161.9674940 MHz

==== CHANNEL f2 =====  
 CPDPRG2 waltz16  
 NUC2 1H  
 PCPD2 90.00 usec  
 PL2 0.00 dB  
 PL12 16.10 dB  
 PL13 19.00 dB  
 SFO2 400.1316000 MHz

F2 - Processing parameters  
 SI 65536  
 SF 161.9755024 MHz  
 MDW no  
 SSB 0  
 LB 0.00 Hz  
 GB 0  
 PC 1.40

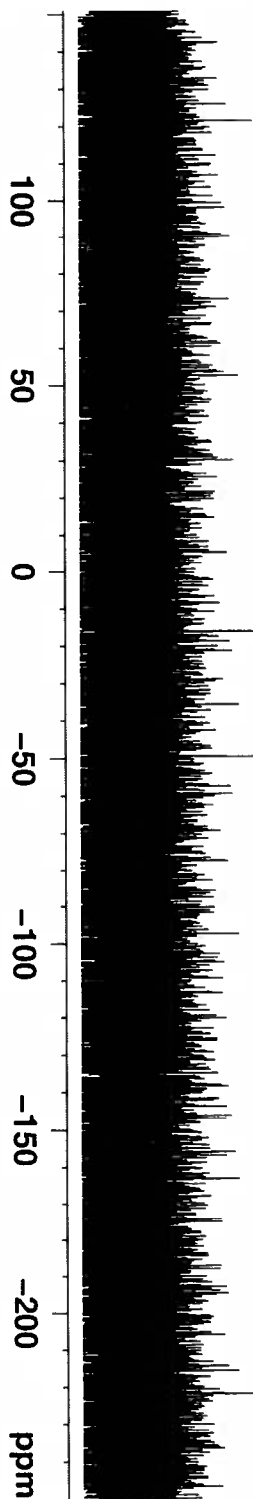

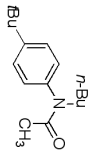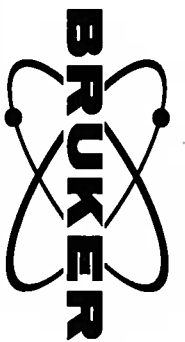

Current Data Parameters  
 NAME jdh-2-229  
 EXPNO 1  
 PROCNO 1

F2 - Acquisition Parameters  
 Date\_ 20080905  
 Time 11.10  
 INSTRUM spect  
 PROBHD 5 mm QNP 1H/13  
 PULPROG zg30  
 TD 65536  
 SOLVENT CDCl3  
 NS 16  
 DS 2  
 SMH 8278.146 Hz  
 FIDRES 0.126314 Hz  
 AQ 3.9584243 sec  
 RG 256  
 DW 60.400 usec  
 DE 6.00 usec  
 TE 292.2 K  
 D1 1.00000000 sec  
 TD0 1

==== CHANNEL f1 =====  
 NUC1 1H  
 P1 13.88 usec  
 PL1 0.00 dB  
 SFO1 400.1324710 MHz

F2 - Processing parameters  
 SI 65536  
 SF 400.1300098 MHz  
 WDW no  
 SSB 0  
 LB 0.00 Hz  
 GB 0  
 PC 1.00

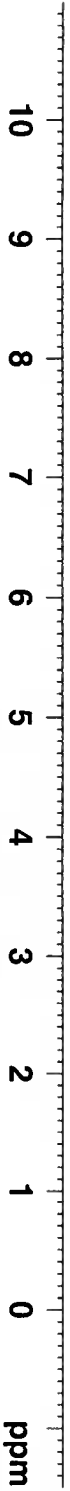

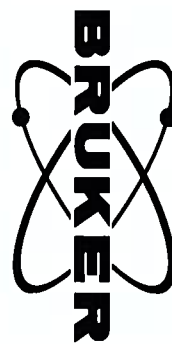

Current Data Parameters  
 NAME jdh-2-229-Carbon  
 EXPNO 1  
 PROCNO 1

F2 - Acquisition Parameters

Date\_ 20080905  
 Time 15.08  
 INSTRUM spect  
 PROBHD 5 mm QNP 1H/13  
 PULPROG zgpg30  
 TD 65536  
 SOLVENT CDCl3  
 NS 128  
 DS 4  
 SWH 23980.814 Hz  
 FIDRES 0.365918 Hz  
 AQ 1.3664756 sec  
 RG 1625.5  
 DW 20.850 usec  
 DE 6.00 usec  
 TE 292.2 K  
 D1 2.00000000 sec  
 d11 0.03000000 sec  
 DELTA 1.89999998 sec  
 TD0 1

==== CHANNEL f1 =====  
 NUC1 13C  
 P1 9.38 usec  
 PL1 0.00 dB  
 SFO1 100.6228298 MHz

==== CHANNEL f2 =====  
 CPDPRG2 waltz16  
 NUC2 1H  
 PCPD2 90.00 usec  
 PL2 0.00 dB  
 PL12 16.10 dB  
 PL13 19.00 dB  
 SFO2 400.1316005 MHz

F2 - Processing parameters  
 SI 32768  
 SF 100.6127776 MHz  
 WDW no  
 SSB 0  
 LB 0.00 Hz  
 GB 0  
 PC 1.40

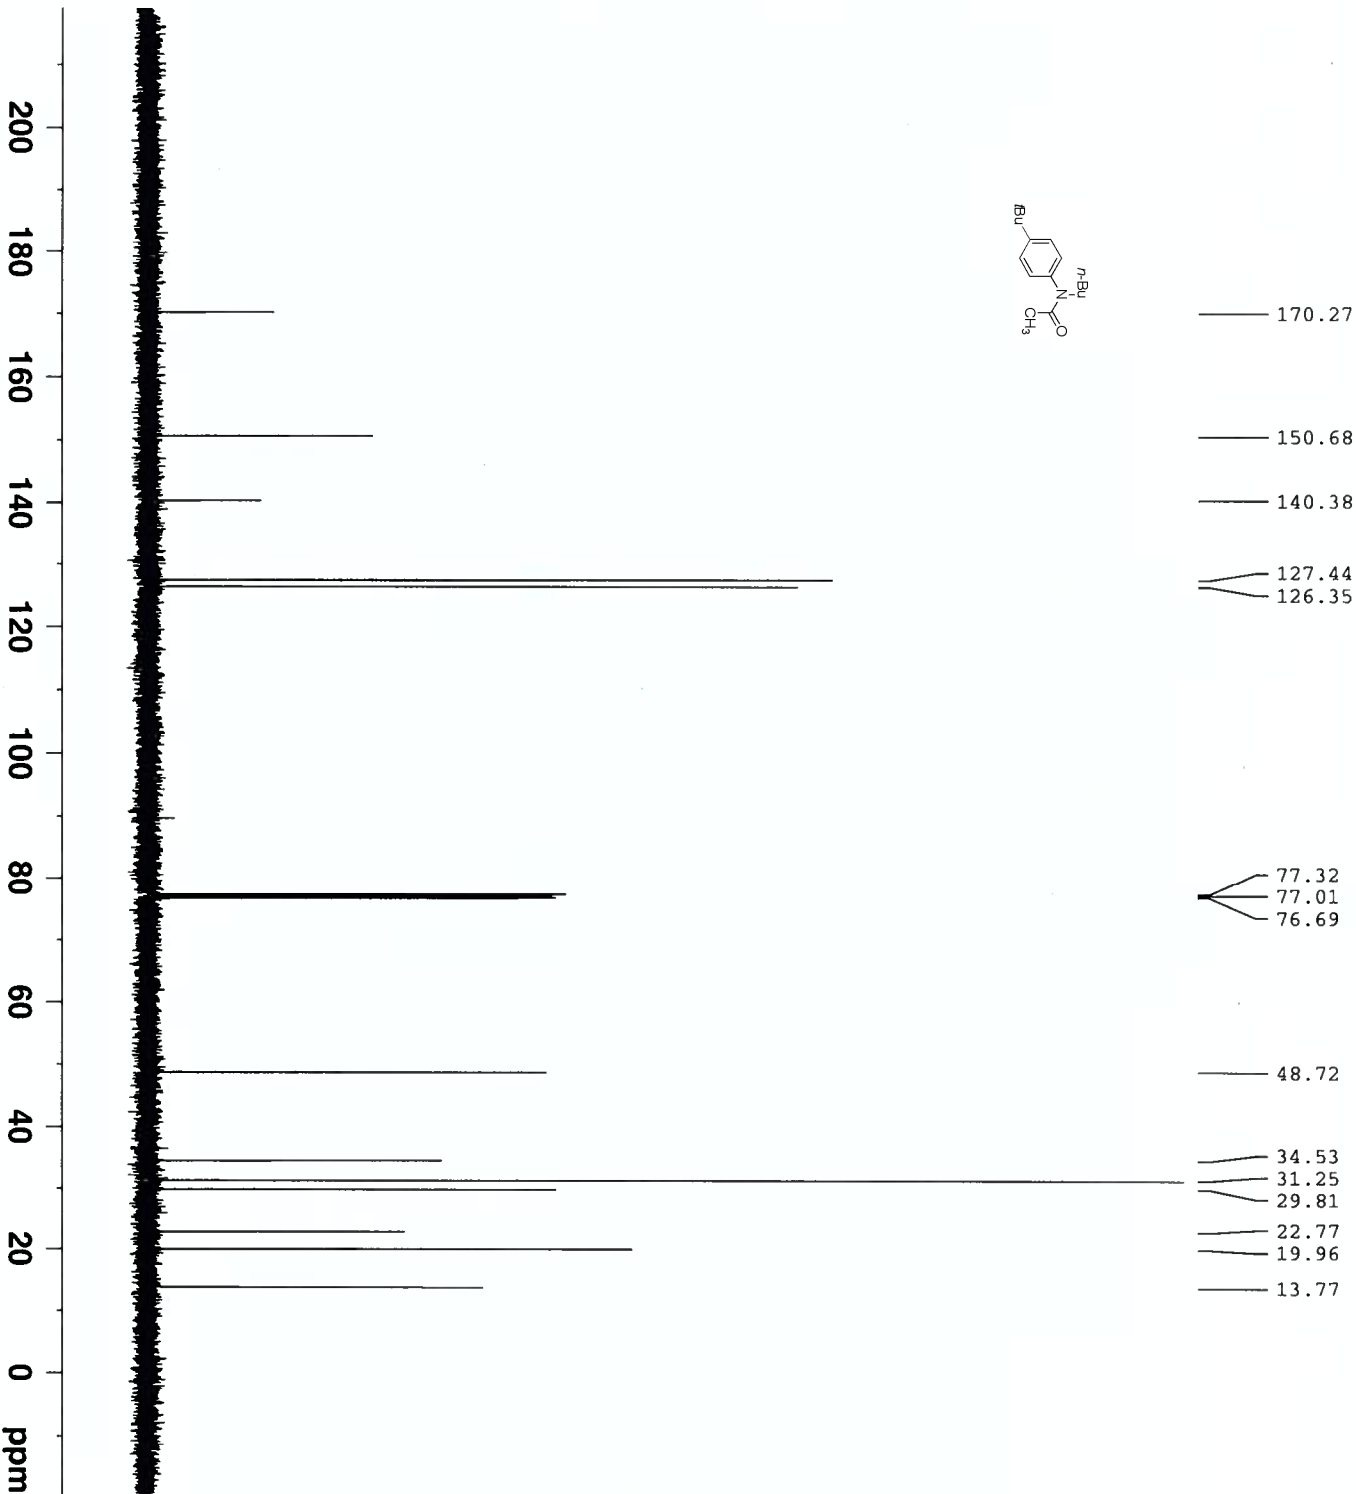

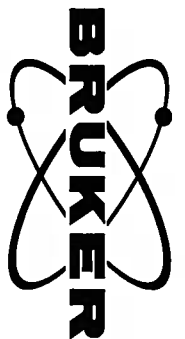

Current Data Parameters  
 NAME jdh-2-237  
 EXPNO 1  
 PROCNO 1

F2 - Acquisition Parameters  
 Date\_ 20080908  
 Time 18.34  
 INSTRUM spect  
 PROBHD 5 mm QNP 1H/13  
 PULPROG zg30  
 TD 65536  
 SOLVENT CDCl3  
 NS 16  
 DS 2  
 SWH 8278.146 Hz  
 FIDRES 0.126314 Hz  
 AQ 3.9584243 sec  
 RG 406.4  
 DW 60.400 usec  
 DE 6.00 usec  
 TE 291.2 K  
 D1 1.00000000 sec  
 TD0 1

==== CHANNEL f1 =====  
 NUC1 1H  
 P1 13.88 usec  
 PL1 0.00 dB  
 SF01 400.1324710 MHz  
 F2 - Processing parameters  
 SI 65536  
 SF 400.1300096 MHz  
 WDW no  
 SSB 0  
 LB 0.00 Hz  
 GB 0  
 PC 1.00

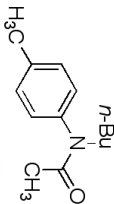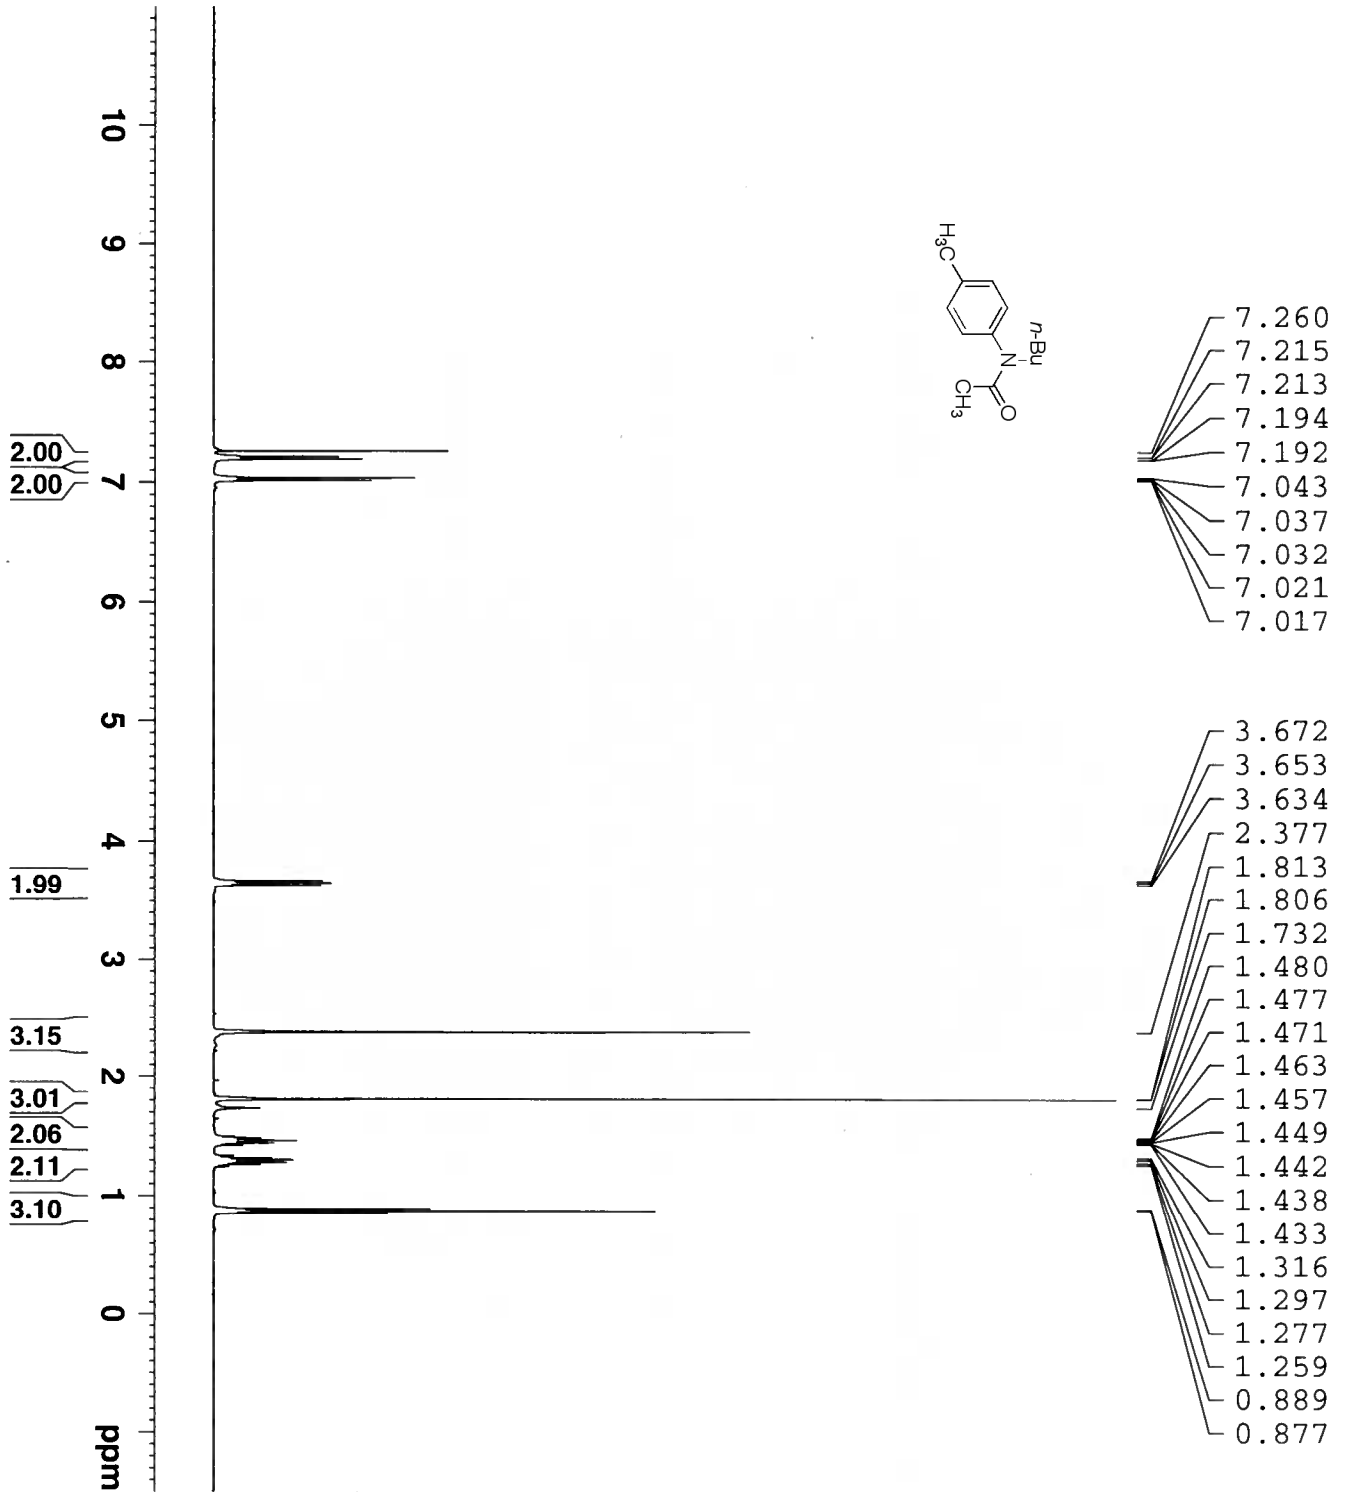

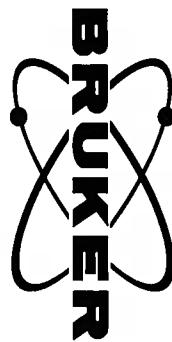

Current Data Parameters  
NAME jdh-2-237-C13  
EXPNO 1  
PROCNO 1

F2 - Acquisition Parameters

Date\_ 20080908  
Time 19.01  
INSTRUM spect  
PROBHD 5 mm QNP 1H/13  
PULPROG zgpg30  
TD 65536  
SOLVENT CDCl3  
NS 256  
DS 4  
SMH 23980.814 Hz  
FIDRES 0.365918 Hz  
AQ 1.3664756 sec  
RG 2896.3  
DW 20.850 usec  
DE 6.00 usec  
TE 293.2 K  
D1 2.0000000 sec  
d11 0.0300000 sec  
DELTA 1.89999998 sec  
TD0 1

==== CHANNEL f1 =====  
NUC1 13C  
P1 9.38 usec  
PL1 0.00 dB  
SFO1 100.6228298 MHz

==== CHANNEL f2 =====  
CPDPRG2 waltz16  
NUC2 1H  
PCPD2 90.00 usec  
PL2 0.00 dB  
PL12 16.10 dB  
PL13 19.00 dB  
SFO2 400.1316005 MHz

F2 - Processing parameters  
SI 32768  
SF 100.6127782 MHz  
WDW hc  
SSB 0  
LB 0.00 Hz  
GB 0  
PC 1.40

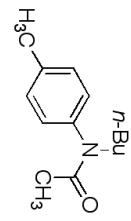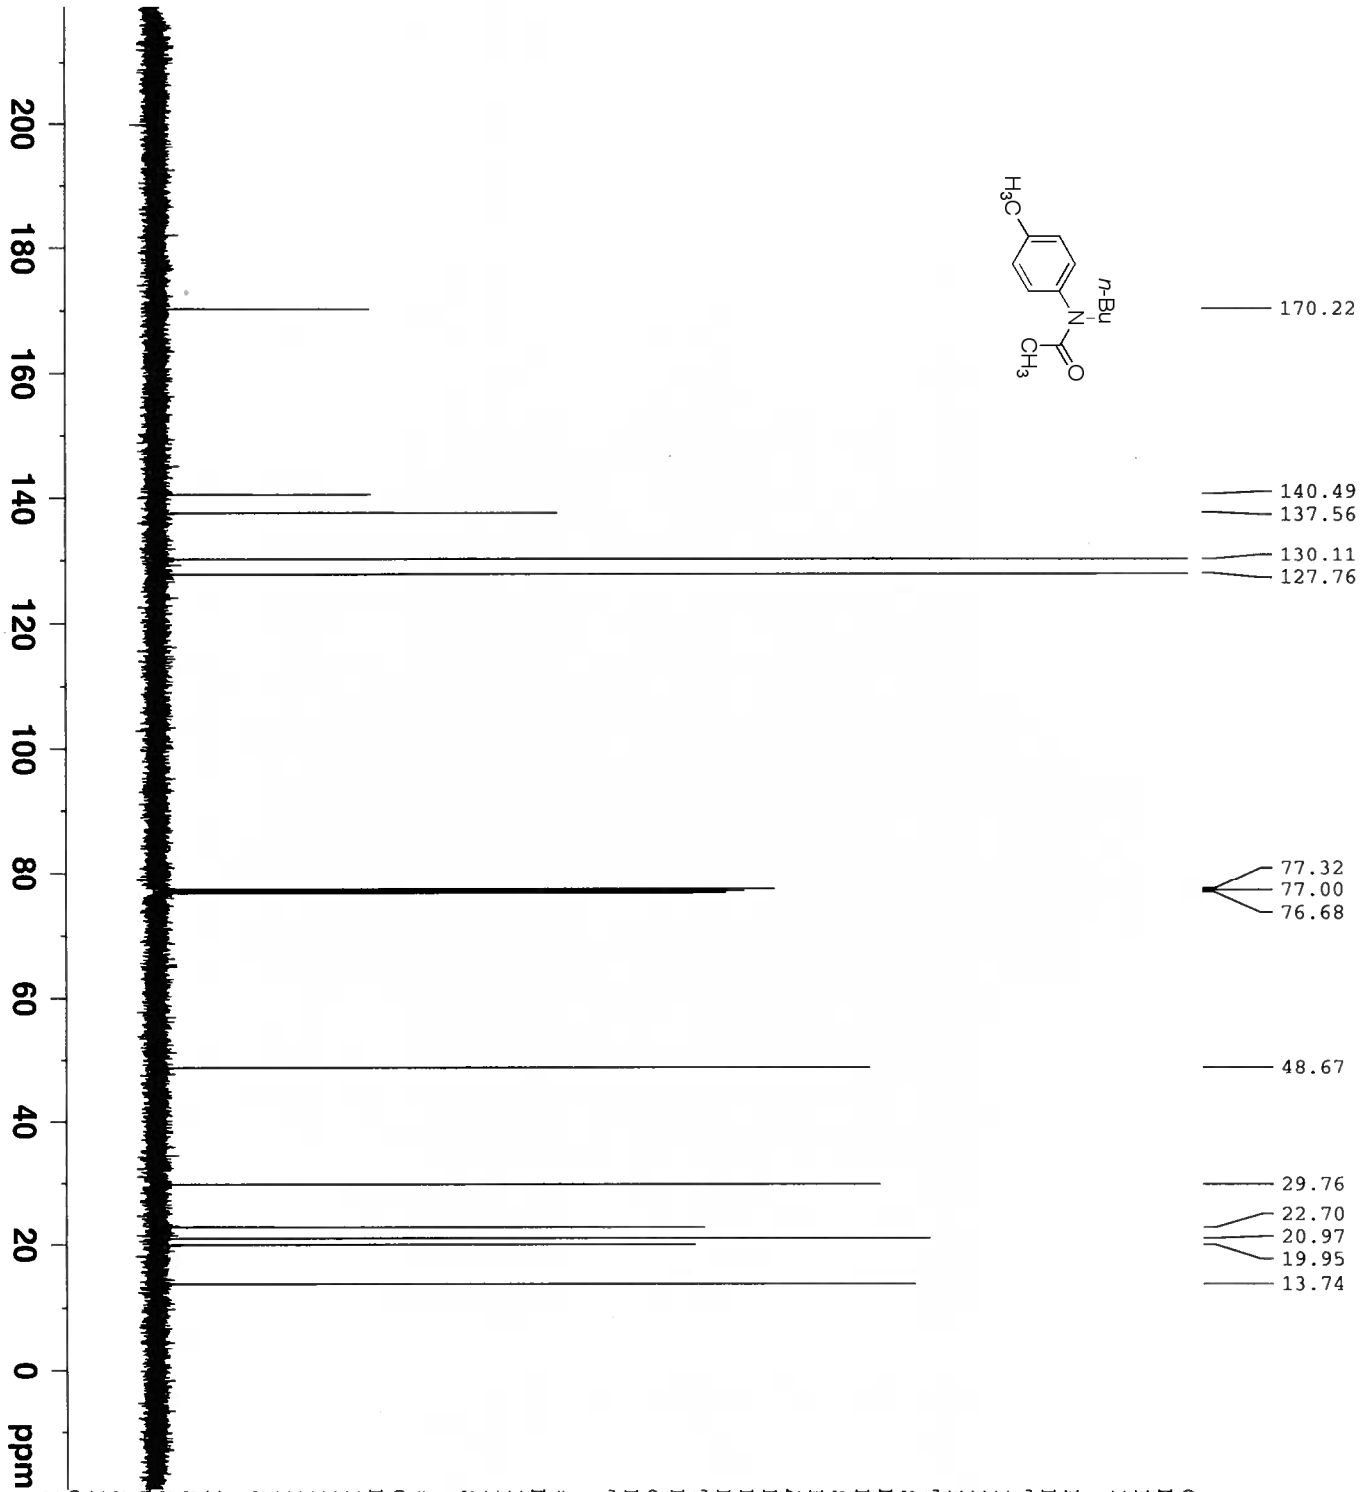

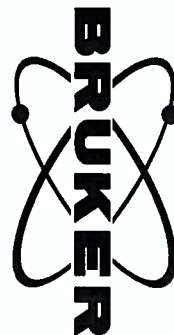

Current Data Parameters  
 NAME jdh-2-241  
 EXPNO 1  
 PROCNO 1

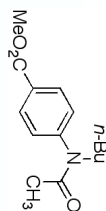

8.102  
 8.081  
 7.260  
 7.250  
 7.229

3.937  
 3.730  
 3.711  
 3.692  
 1.851  
 1.650  
 1.480  
 1.460  
 1.441  
 1.422  
 1.319  
 1.301  
 1.282  
 1.263  
 0.888  
 0.870  
 0.852

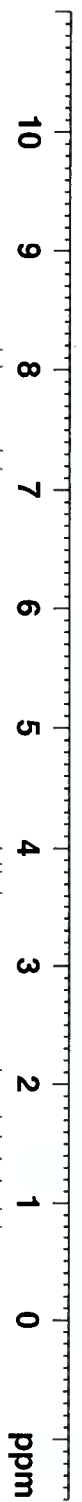

F2 - Acquisition Parameters  
 Date\_ 20080909  
 Time 12.25  
 INSTRUM spect  
 PROBHD 5 mm QNP 1H/13  
 PULPROG zg30  
 TD 65536  
 SOLVENT CDCl3  
 NS 16  
 DS 2  
 SWH 8278.146 Hz  
 FIDRES 0.126314 Hz  
 AQ 3.9584243 sec  
 RG 406.4  
 DW 60.400 usec  
 DE 6.00 usec  
 TE 292.2 K  
 D1 1.0000000 sec  
 TD0 1

==== CHANNEL f1 =====  
 NUC1 1H  
 P1 13.88 usec  
 PL1 0.00 dB  
 SFO1 400.1324710 MHz  
 F2 - Processing parameters  
 SI 65536  
 SF 400.1300096 MHz  
 WDW no  
 SSB 0  
 LB 0.00 Hz  
 GB 0  
 PC 1.00



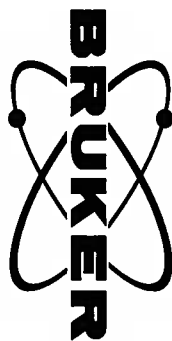

Current Data Parameters  
 NAME jdh-2-241-c13  
 EXPNO 1  
 PROCNO 1

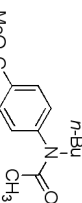

- 169.54
- 166.07
- 147.15
- 130.93
- 129.30
- 127.90
- 77.32
- 77.00
- 76.68
- 52.23
- 48.71
- 29.82
- 22.75
- 19.87
- 13.64

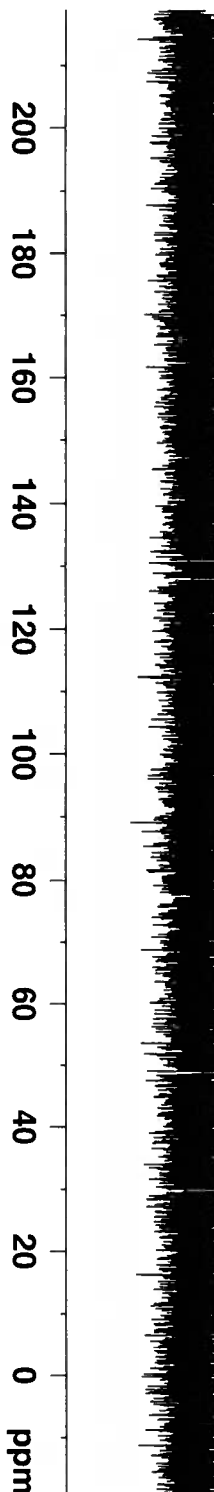

F2 - Acquisition Parameters

Date\_ 20080909  
 Time 14.24  
 INSTRUM spect  
 PROBHD 5 mm QNP 1H/13  
 PULPROG zgpg30  
 TD 65536  
 SOLVENT CDCl3  
 NS 128  
 DS 4  
 SWH 23980.814 Hz  
 FIDRES 0.365918 Hz  
 AQ 1.3664756 sec  
 RG 1625.5  
 DW 20.850 usec  
 DE 6.00 usec  
 TE 292.2 K  
 D1 2.00000000 sec  
 d11 0.03000000 sec  
 DELTA 1.89999998 sec  
 TD0 1

==== CHANNEL f1 =====

NUC1 13C  
 P1 9.38 usec  
 PL1 0.00 dB  
 SFO1 100.6228298 MHz

==== CHANNEL f2 =====

CPDPRG2 waltz16  
 NUC2 1H  
 PCPDP2 90.00 usec  
 PL2 0.00 dB  
 PL12 16.10 dB  
 PL13 19.00 dB  
 SFO2 400.1316005 MHz

F2 - Processing parameters

SI 32768  
 SF 100.6127797 MHz  
 WDW no  
 SSB 0  
 LB 0.00 Hz  
 GB 0  
 PC 1.40

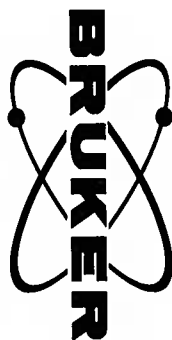

Current Data Parameters  
 NAME jdh-2-232  
 EXPNO 1  
 PROCNO 1

F2 - Acquisition Parameters  
 Date\_ 20080906  
 Time 11.51  
 INSTRUM spect  
 PROBHD 5 mm QNP 1H/13  
 PULPROG zg30  
 TD 65536  
 SOLVENT CDCl3  
 NS 16  
 DS 2  
 SMH 8278.146 Hz  
 FIDRES 0.126314 Hz  
 AQ 3.9584243 sec  
 RG 322.5  
 DW 60.400 usec  
 DE 6.00 usec  
 TE 292.2 K  
 D1 1.00000000 sec  
 TD0 1

==== CHANNEL f1 =====  
 NUC1 1H  
 P1 13.88 usec  
 PL1 0.00 dB  
 SF01 400.1324710 MHz  
 F2 - Processing parameters  
 SI 65536  
 SF 400.1300100 MHz  
 WDW no  
 SSB 0  
 LB 0.00 Hz  
 GB 0  
 PC 1.00

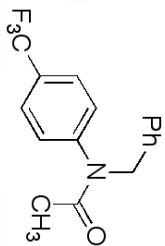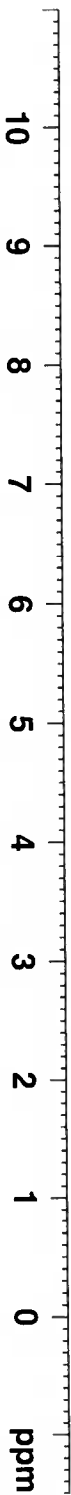

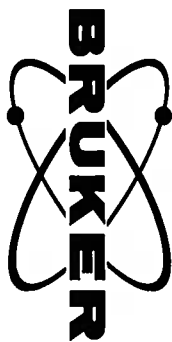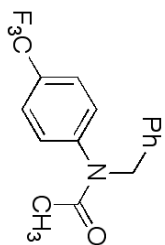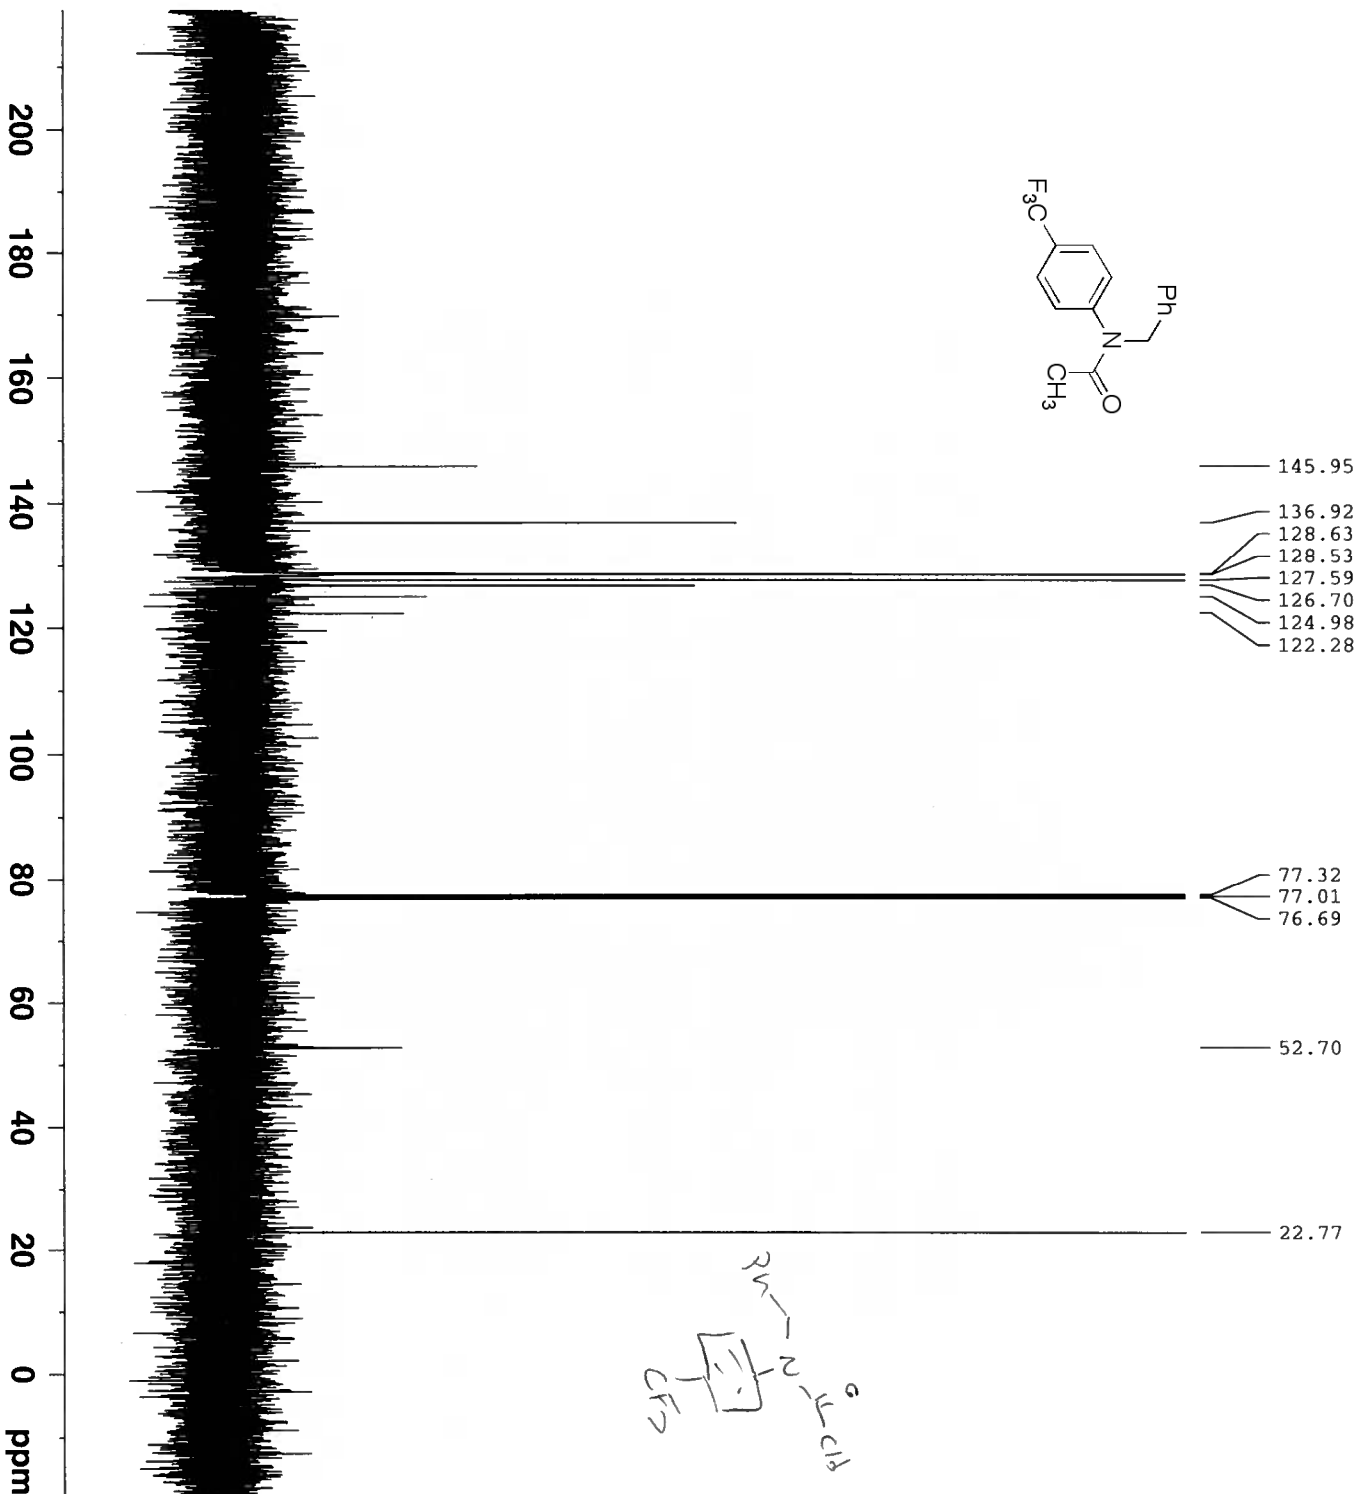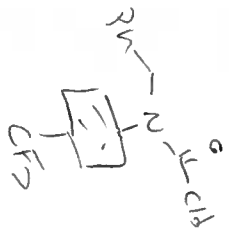

Current Data Parameters  
 NAME jdn-2-232-c13  
 EXPNO 1  
 PROCNO 1

F2 - Acquisition Parameters

Date\_ 20080906  
 Time 13.11  
 INSTRUM spect  
 PROBHD 5 mm QNP 1H/13  
 PULPROG zgpg30  
 TD 65536  
 SOLVENT CDCl3  
 NS 256  
 DS 4  
 SWH 23980.814 Hz  
 FIDRES 0.365918 Hz  
 AQ 1.3664756 sec  
 RG 2298.8  
 DW 20.850 usec  
 DE 6.00 usec  
 TE 293.2 K  
 D1 2.00000000 sec  
 d11 0.03000000 sec  
 DELTA 1.89999998 sec  
 TD0 1

CHANNEL f1 =====

NUC1 13C  
 P1 9.38 usec  
 PL1 0.00 dB  
 SF01 100.6228298 MHz

CHANNEL f2 =====

CPDPRG2 waltz216  
 NUC2 1H  
 PCPD2 90.00 usec  
 PL2 0.00 dB  
 PL12 16.10 dB  
 PL13 19.00 dB  
 SF02 400.1316005 MHz

F2 - Processing parameters

SI 32768  
 SF 100.6127740 MHz  
 WDW no  
 SSB 0  
 LB 0.00 Hz  
 GB 0  
 PC 1.40

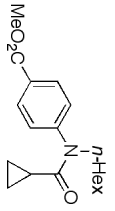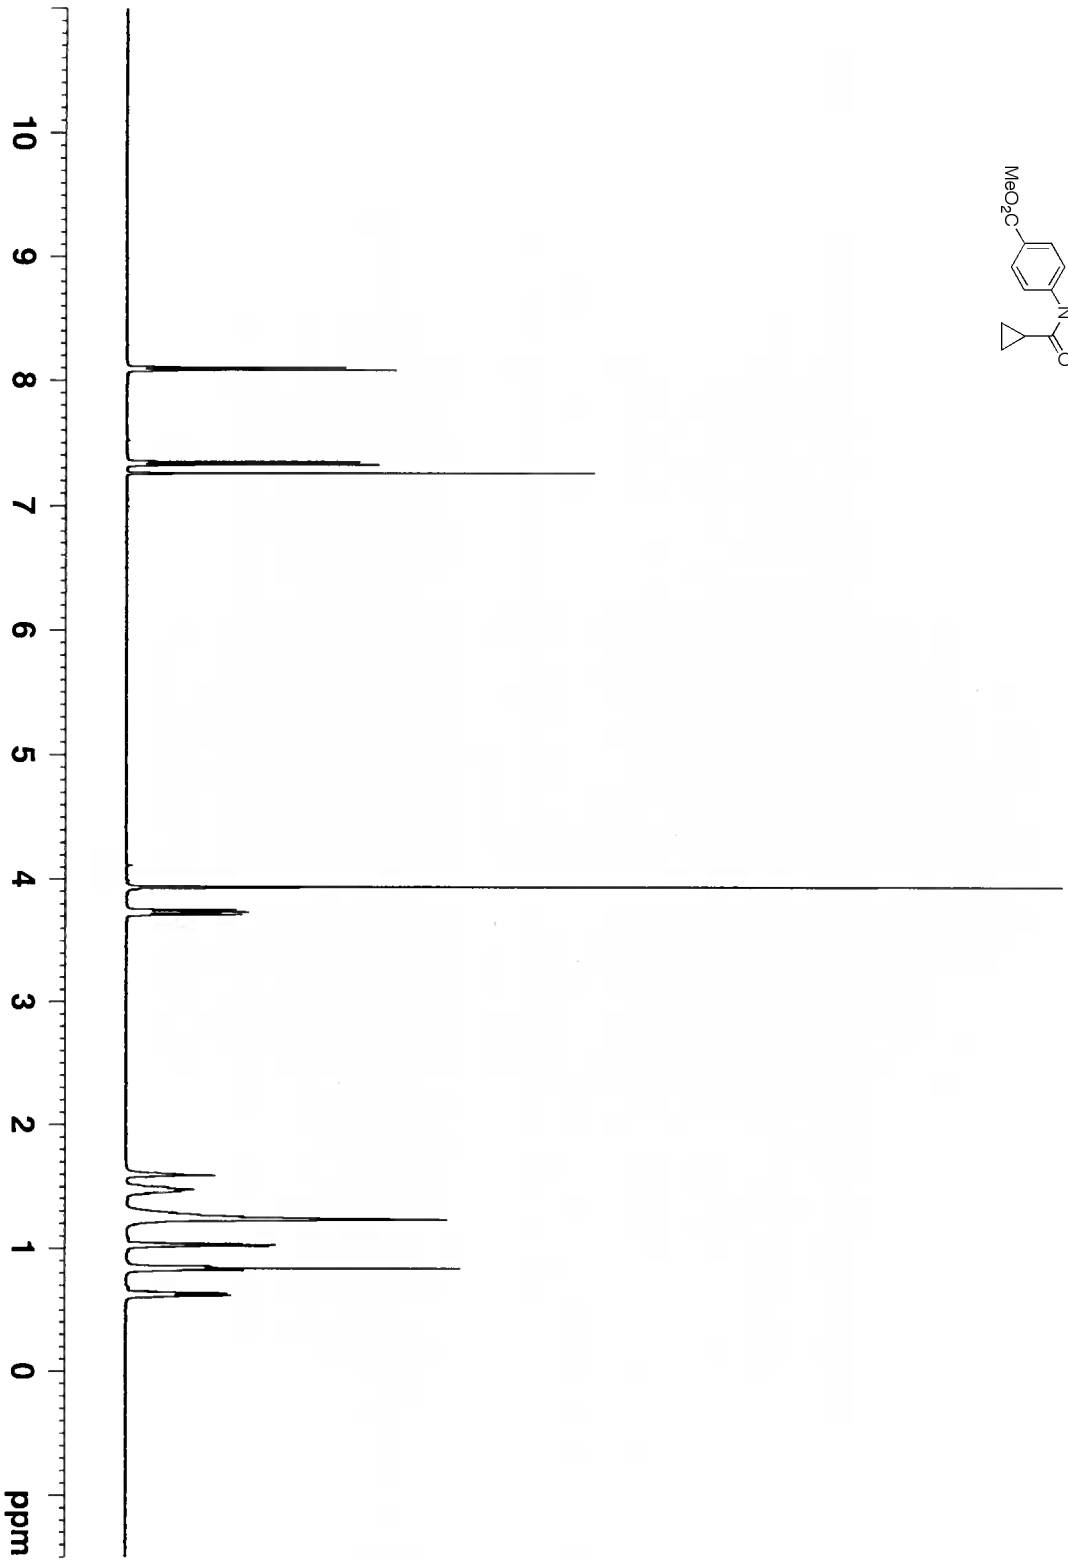

Current Data Parameters  
 Name jdh-2-243  
 EXPNO 1  
 PROCNO 1

F2 - Acquisition Parameters

Date\_ 20080911  
 Time 17.31  
 INSTRUM spect  
 PROBHD 5 mm BBO BB-1H  
 PULPROG zg30  
 TD 65536  
 SOLVENT CDCl3  
 NS 16  
 DS 2  
 SWH 8278.146  
 FIDRES 0.126314  
 AQ 3.9584243  
 RG 181  
 DW 60.400  
 DE 6.00  
 TE 293.2  
 D1 1.00000000  
 TD0 1

==== CHANNEL F1 =====  
 NUCL1 1H  
 P1 15.07  
 PL1 0.00  
 SFO1 400.1324710

F2 - Processing Parameters  
 SI 65536  
 SF 400.1300102  
 WDW no  
 SSB 0  
 LB 0.00  
 GB 0  
 PC 1.00

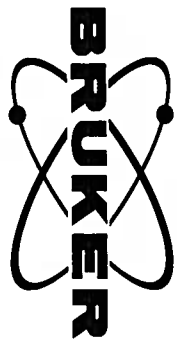

Current Data Parameters  
 NAME fdh-2-243-C13  
 EXPNO 1  
 PROCNO 1

F2 - Acquisition Parameters

Date\_ 20080911  
 Time 17.48  
 INSTRUM spect  
 PROBHD 5 mm BBO BB-1H  
 PULPROG zgpg30  
 TD 65536  
 SOLVENT CDCl3  
 NS 129  
 DS 2  
 SWH 23980.814 Hz  
 FIDRES 0.365918 Hz  
 AQ 1.3664756 sec  
 RG 8192  
 DW 20.850 usec  
 DE 6.00 usec  
 TE 293.2 K  
 D1 2.00000000 sec  
 d11 0.03000000 sec  
 DELTA 1.89999998 sec  
 TD0 1

==== CHANNEL f1 =====  
 NUC1 13C  
 P1 8.75 usec  
 PL1 -3.00 dB  
 SFO1 100.6228298 MHz

==== CHANNEL f2 =====  
 CPDPRG2 waltz16  
 NUC2 1H  
 PCPD2 90.00 usec  
 PL2 -1.00 dB  
 PL12 14.52 dB  
 PL13 18.00 dB  
 SFO2 400.1316005 MHz

F2 - Processing Parameters  
 SI 65536  
 SF 100.6127773 MHz  
 MDMW no  
 SSB no  
 LB 0.00 Hz  
 GB 0  
 PC 1.40

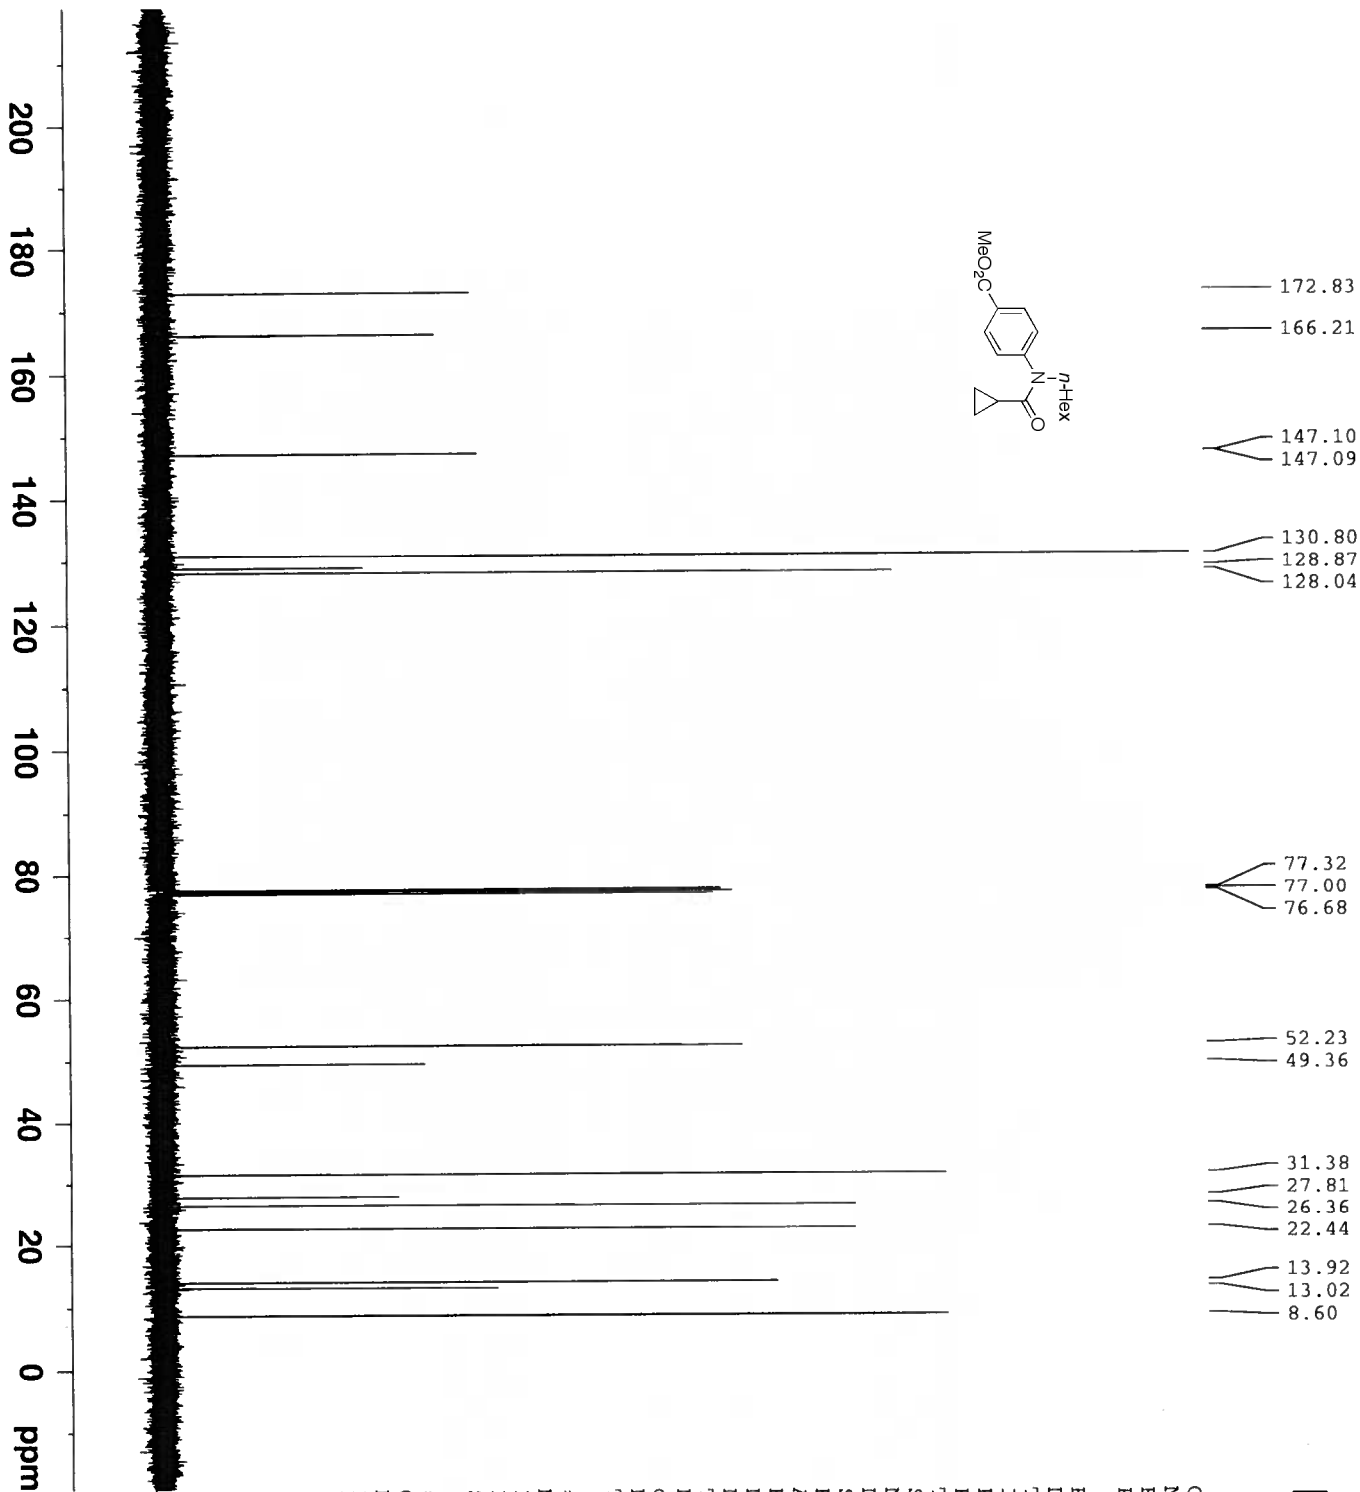

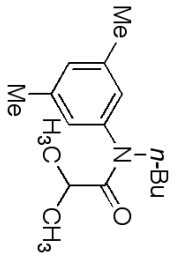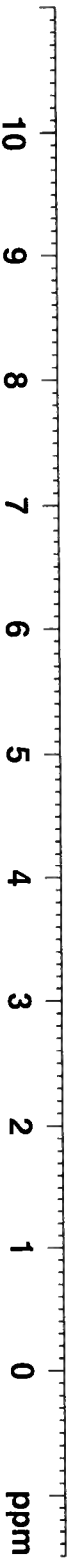

Current Data Parameters  
 NAME jdh-2-244  
 EXPNO 1  
 PROCNO 1

F2 - Acquisition Parameters  
 Date\_ 20080911  
 Time 17.35  
 INSTRUM spect  
 PROBHD 5 mm BBO BB-1H  
 PULPROG zg30  
 TD 65536  
 SOLVENT CDCl3  
 NS 16  
 DS 2  
 SWH 8278.146  
 FIDRES 0.126314  
 AQ 3.9584243  
 RG 128  
 DW 60.400  
 DE 6.00  
 TE 293.2  
 D1 1.00000000  
 TD0 1  
 1  
 1  
 0

==== CHANNEL f1 ====

NUC1 1H  
 P1 15.07  
 PL1 0.00  
 SFO1 400.1324710

F2 - Processing Parameters  
 SI 65536  
 SF 400.1300096  
 WDW no  
 SSB 0  
 LB 0.00  
 GB 0  
 PC 1.00

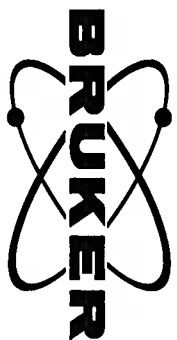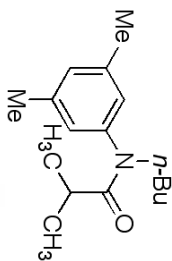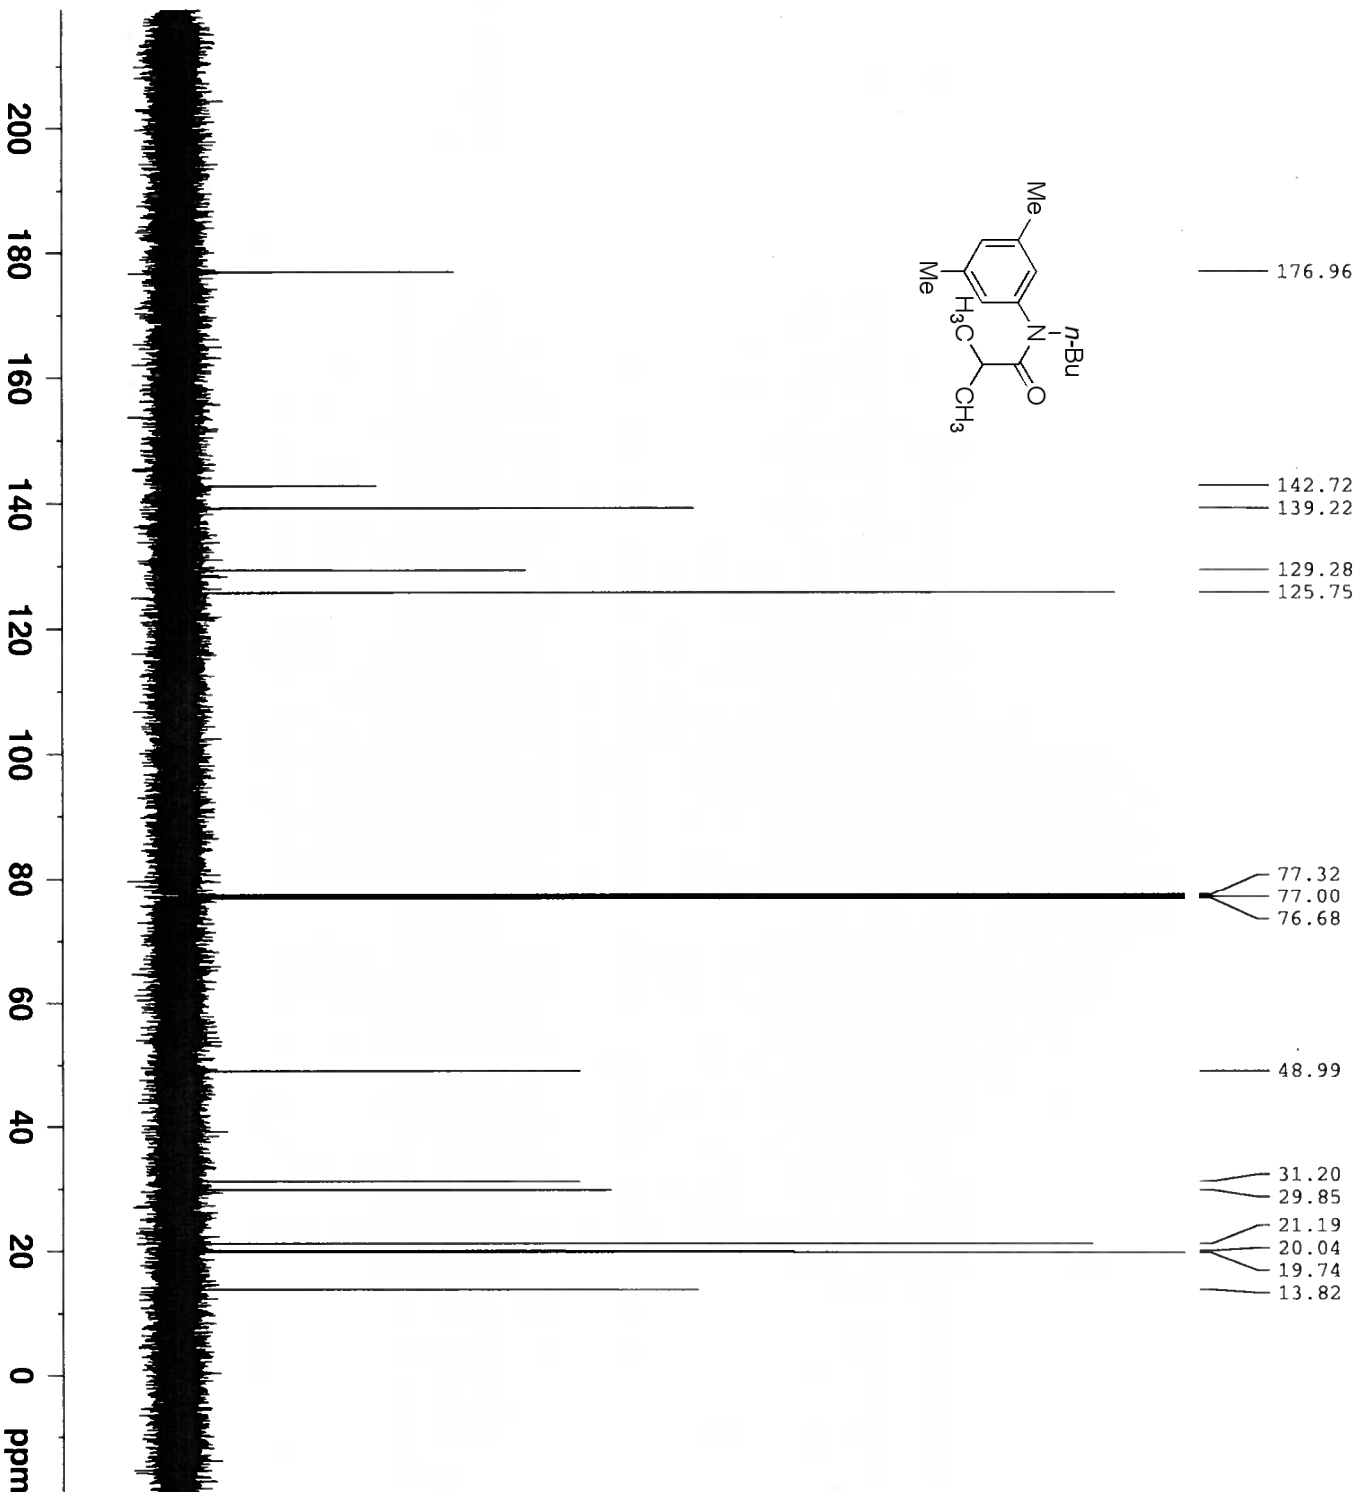

Current Data Parameters  
 NAME jdh-2-244-C13  
 EXPNO 1  
 PROCNO 1

F2 - Acquisition Parameters

Date\_ 20080911  
 Time 17.59  
 INSTRUM spect  
 PROBD 5 mm BBO BB-1H  
 PULPROG zgpg30  
 TD 65536  
 SOLVENT CDCl3  
 NS 129  
 DS 2  
 SWH 23980.814 Hz  
 FIDRES 0.365918 Hz  
 AQ 1.3664756 sec  
 RG 8192  
 DW 20.850 usec  
 DE 6.00 usec  
 TE 293.2 K  
 D1 2.00000000 sec  
 d11 0.03000000 sec  
 DELTA 1.89999998 sec  
 TD0 1

==== CHANNEL f1 =====  
 NUC1 13C  
 P1 8.75 usec  
 PL1 -3.00 dB  
 SFO1 100.6228298 MHz

==== CHANNEL f2 =====  
 CPDPRG2 waltz16  
 NUC2 1H  
 PCPDP2 90.00 usec  
 PL2 -1.00 dB  
 PL12 14.52 dB  
 PL13 18.00 dB  
 SFO2 400.1316005 MHz

F2 - Processing parameters  
 SI 65536  
 SF 100.6127743 MHz  
 WDW no  
 SSB no  
 LB 0.00 Hz  
 GB 0  
 PC 1.40

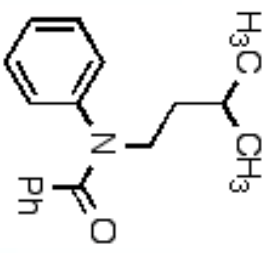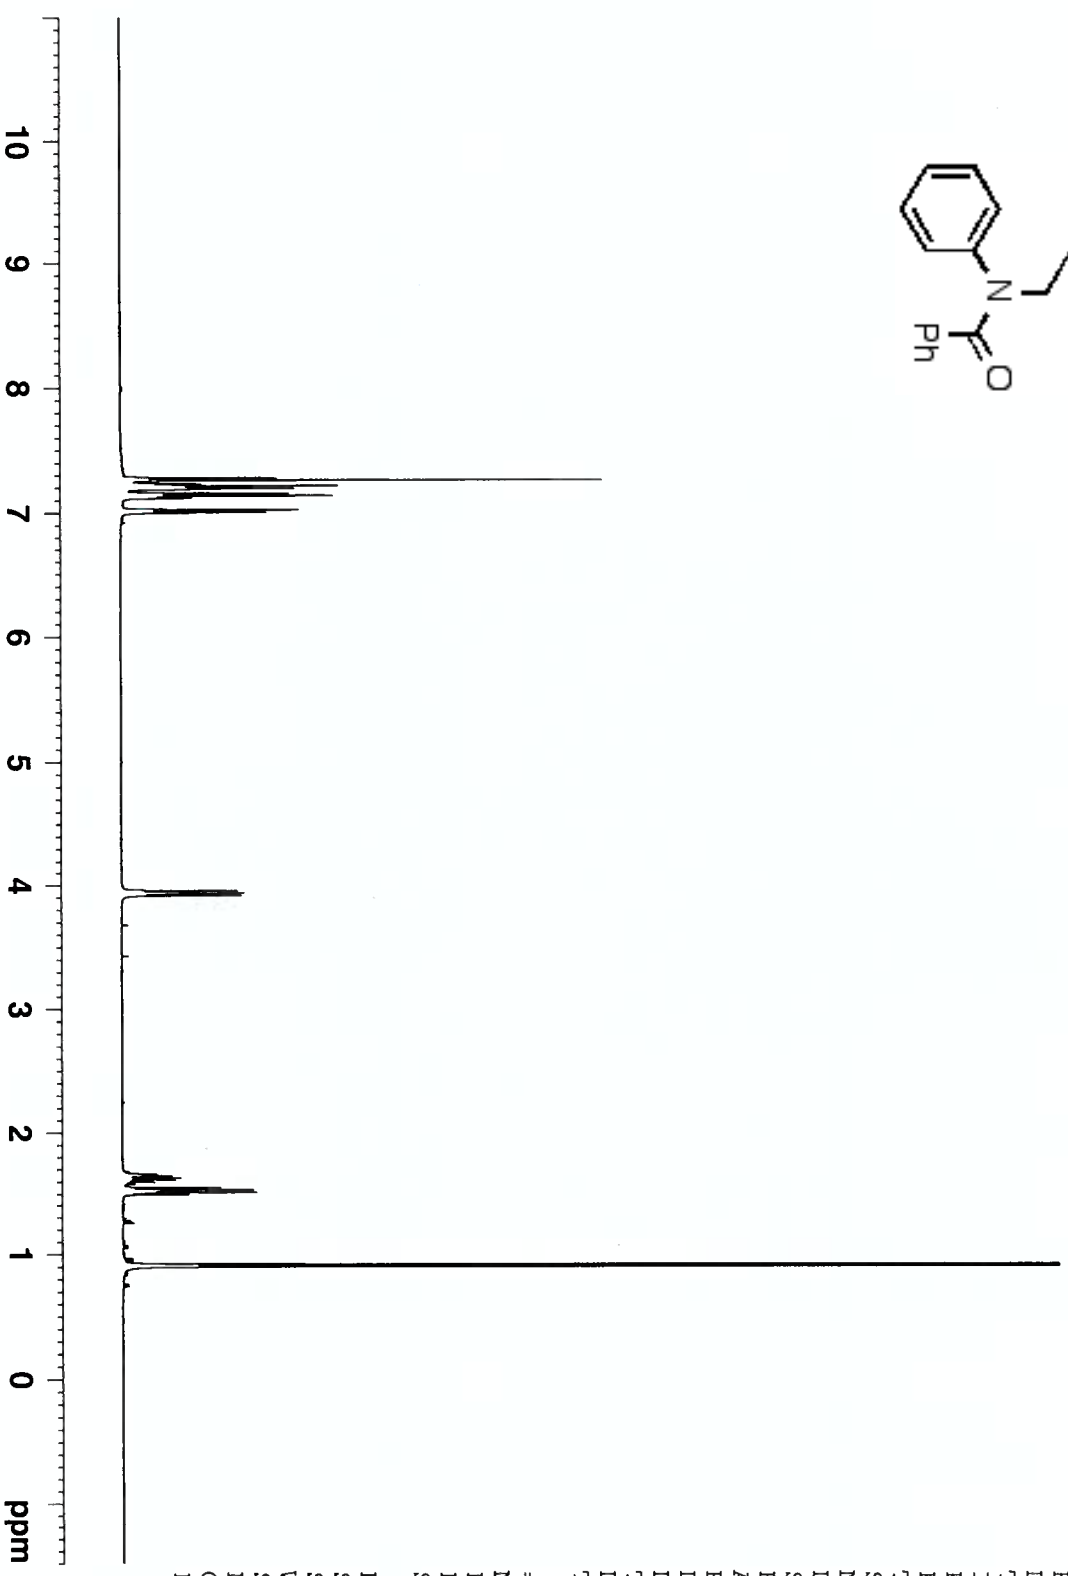

Current Data Parameters  
 NAME jdh-2-248-2  
 EXPNO 1  
 PROCNO 1

F2 - Acquisition Parameters  
 Date\_ 20080917  
 Time 12.01

INSTRUM spect  
 PROBHD 5 mm BBO BB-1H  
 PULPROG zg30  
 TD 65536  
 SOLVENT CDCl3  
 NS 16  
 DS 2

SWH 8278.146  
 FIDRES 0.126314  
 AQ 3.9584243  
 RG 128  
 DW 60.400  
 DE 6.00  
 TE 293.2  
 D1 1.00000000  
 TD0 1

==== CHANNEL f1 ====  
 NUC1 1H  
 P1 15.07  
 PL1 0.00  
 SFO1 400.1324710

F2 - Processing parameters  
 SI 65536  
 SF 400.1300098  
 WDW no  
 SSB 0  
 LB 0.00  
 GB 0  
 PC 1.00



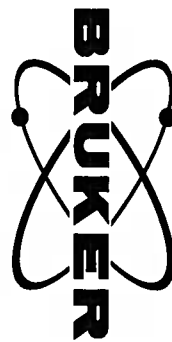

Current Data Parameters  
 NAME jdh-2-248-c13  
 EXPNO 1  
 PROCNO 1

F2 - Acquisition Parameters  
 Date\_ 20080917  
 Time 12.34

INSTRUM spect  
 PROBHD 5 mm BBO BB-1H  
 PULPROG zgpg30  
 TD 65536  
 SOLVENT CDCl3  
 NS 129  
 DS 2

SWH 23980.814 Hz  
 FIDRES 0.365918 Hz  
 AQ 1.3664756 sec  
 RG 8192  
 DW 20.850 usec  
 DE 6.00 usec  
 TE 293.2 K

D1 2.00000000 sec  
 d11 0.03000000 sec  
 DELTA 1.89999998 sec  
 TD0 1

==== CHANNEL f1 =====  
 NUC1 13C  
 P1 8.75 usec  
 PL1 -3.00 dB  
 SFO1 100.6228298 MHz

==== CHANNEL f2 =====  
 CPDPRG2 waltz16  
 NUC2 1H  
 PCPD2 90.00 usec  
 PL2 -1.00 dB  
 PL12 14.52 dB  
 PL13 18.00 dB  
 SFO2 400.1316005 MHz

F2 - Processing Parameters  
 SI 65536  
 SF 100.6127811 MHz  
 WDW no  
 SSB 0  
 LB 0.00 Hz  
 GB 0  
 PC 1.40

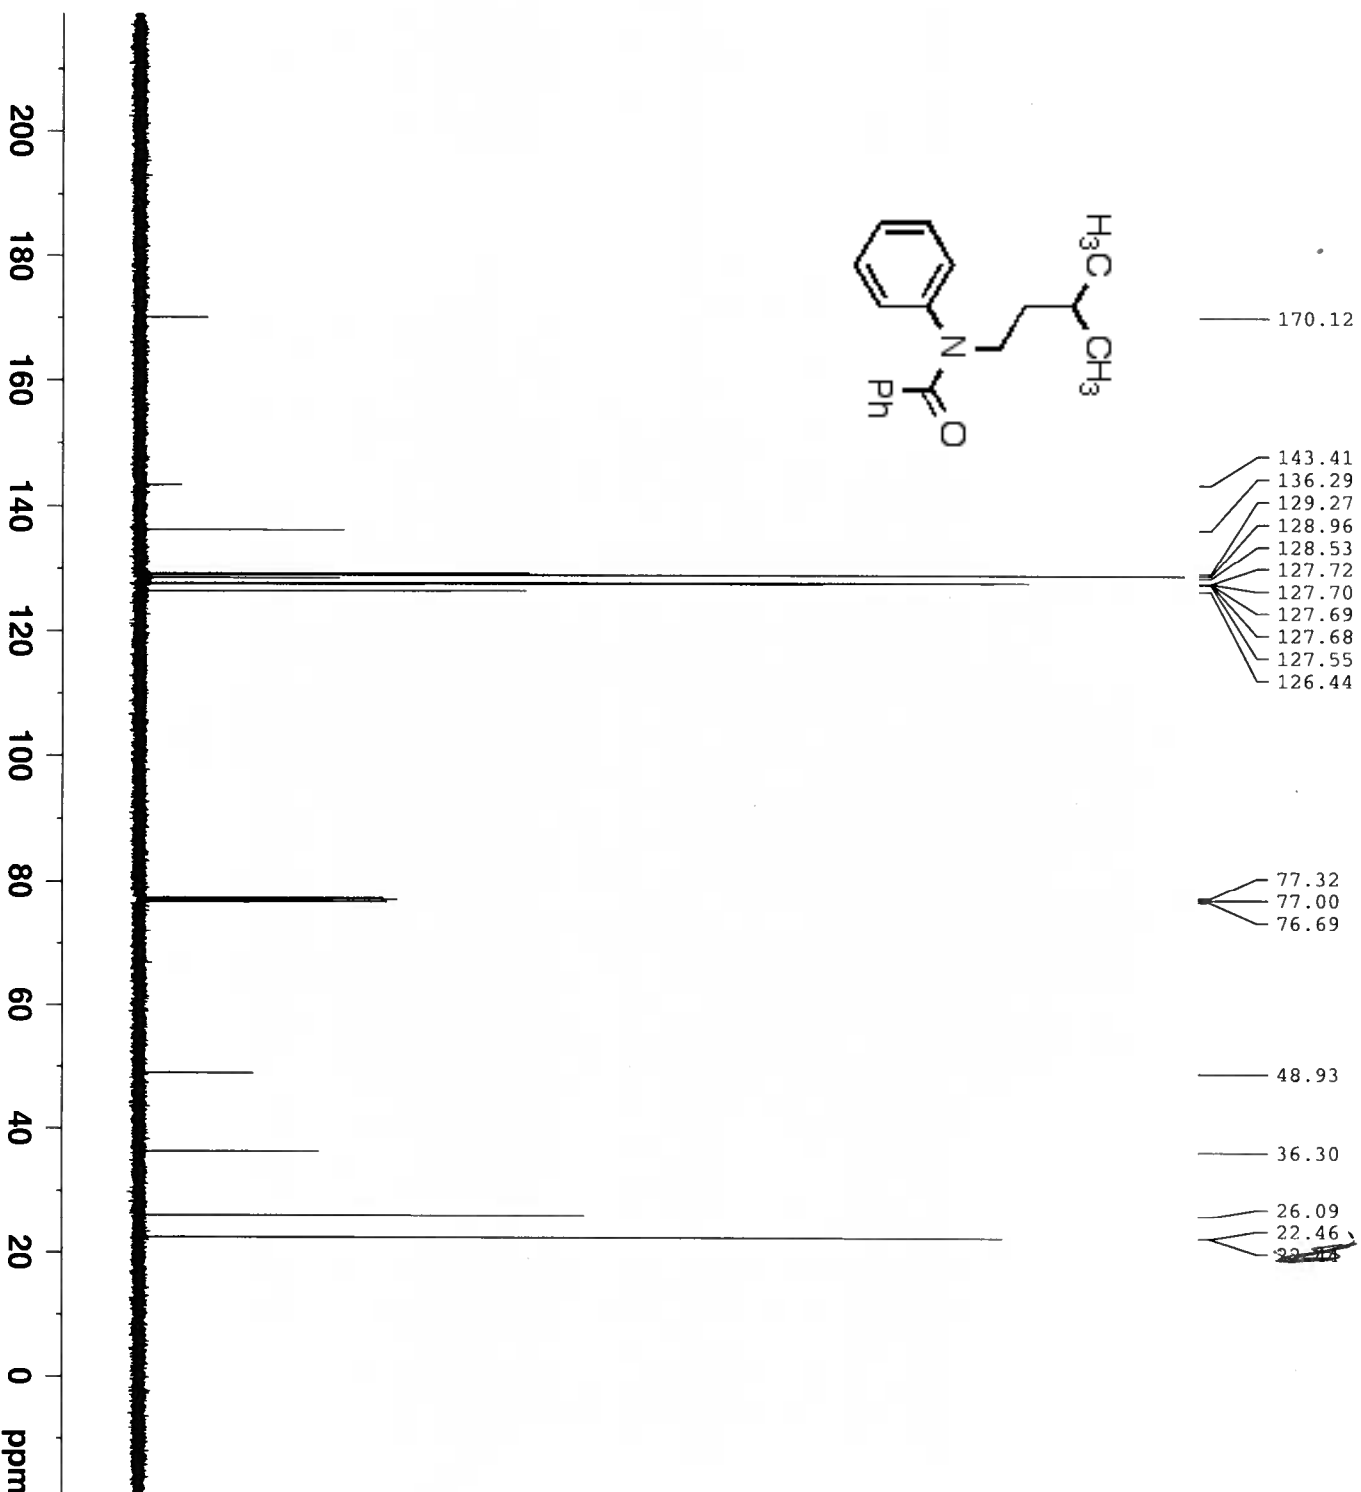

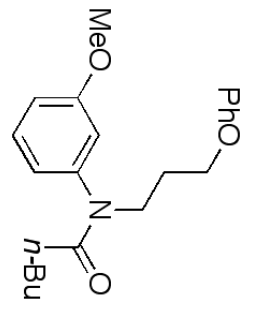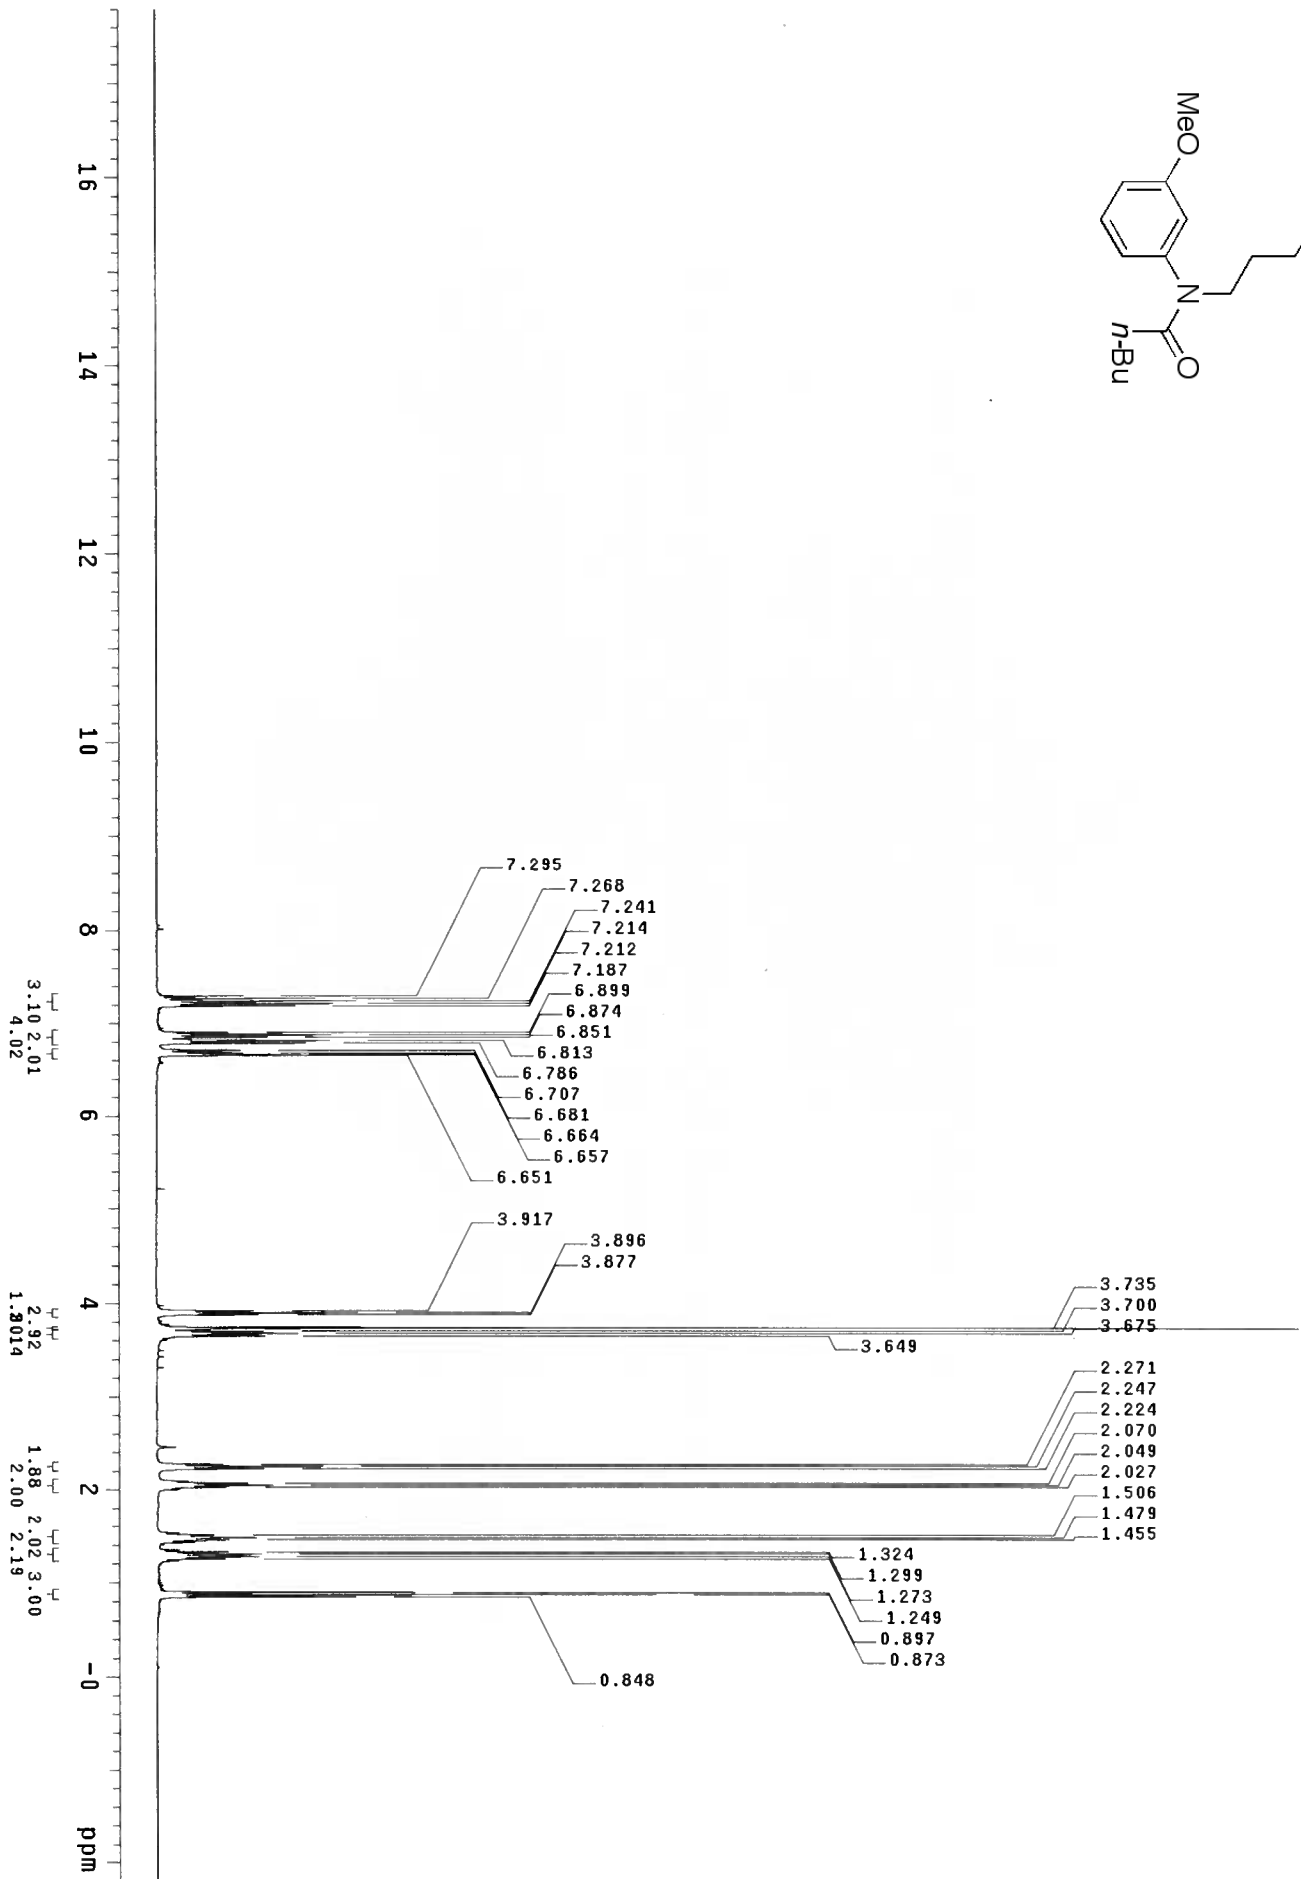

albl-62-c

exptl std13c

SAMPLE

DEC. & VT

date Jul 30 2008 dfrq 300.107

solvent CDCl3 dn H1

file /data/export/~ dpwr 39

home /\$lbuach/bcacie~ dof 0

/mthat/albl-62-c:ft~ dm yyy

dm w

dm 11000

dm 20.0

temp 11000

PROCESsing

sb -1.500

sbs -1.500

wtfile ft

proc 262144

ft

ACQUISITION

sfrq 75.471

tn C13

at 1.500

np 67874

sw 22624.4

fb 12400

bs 8

tpwr 55

pw 10.0

dl 0.500

tof 2264.0

nt 1000

ct 128

atlock n

gain not used

FLAGS

il n

in n

dp y

DISPLAY

sp -1533.2

wp 22624.3

vs 46

sc 0

wc 250

hzm 90.50

is 500.00

rfl 7343.9

rfd 5810.5

th 9

ins 77.000

dl no ph

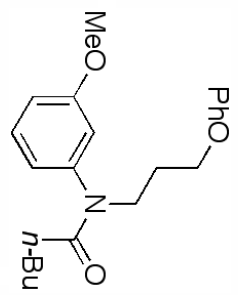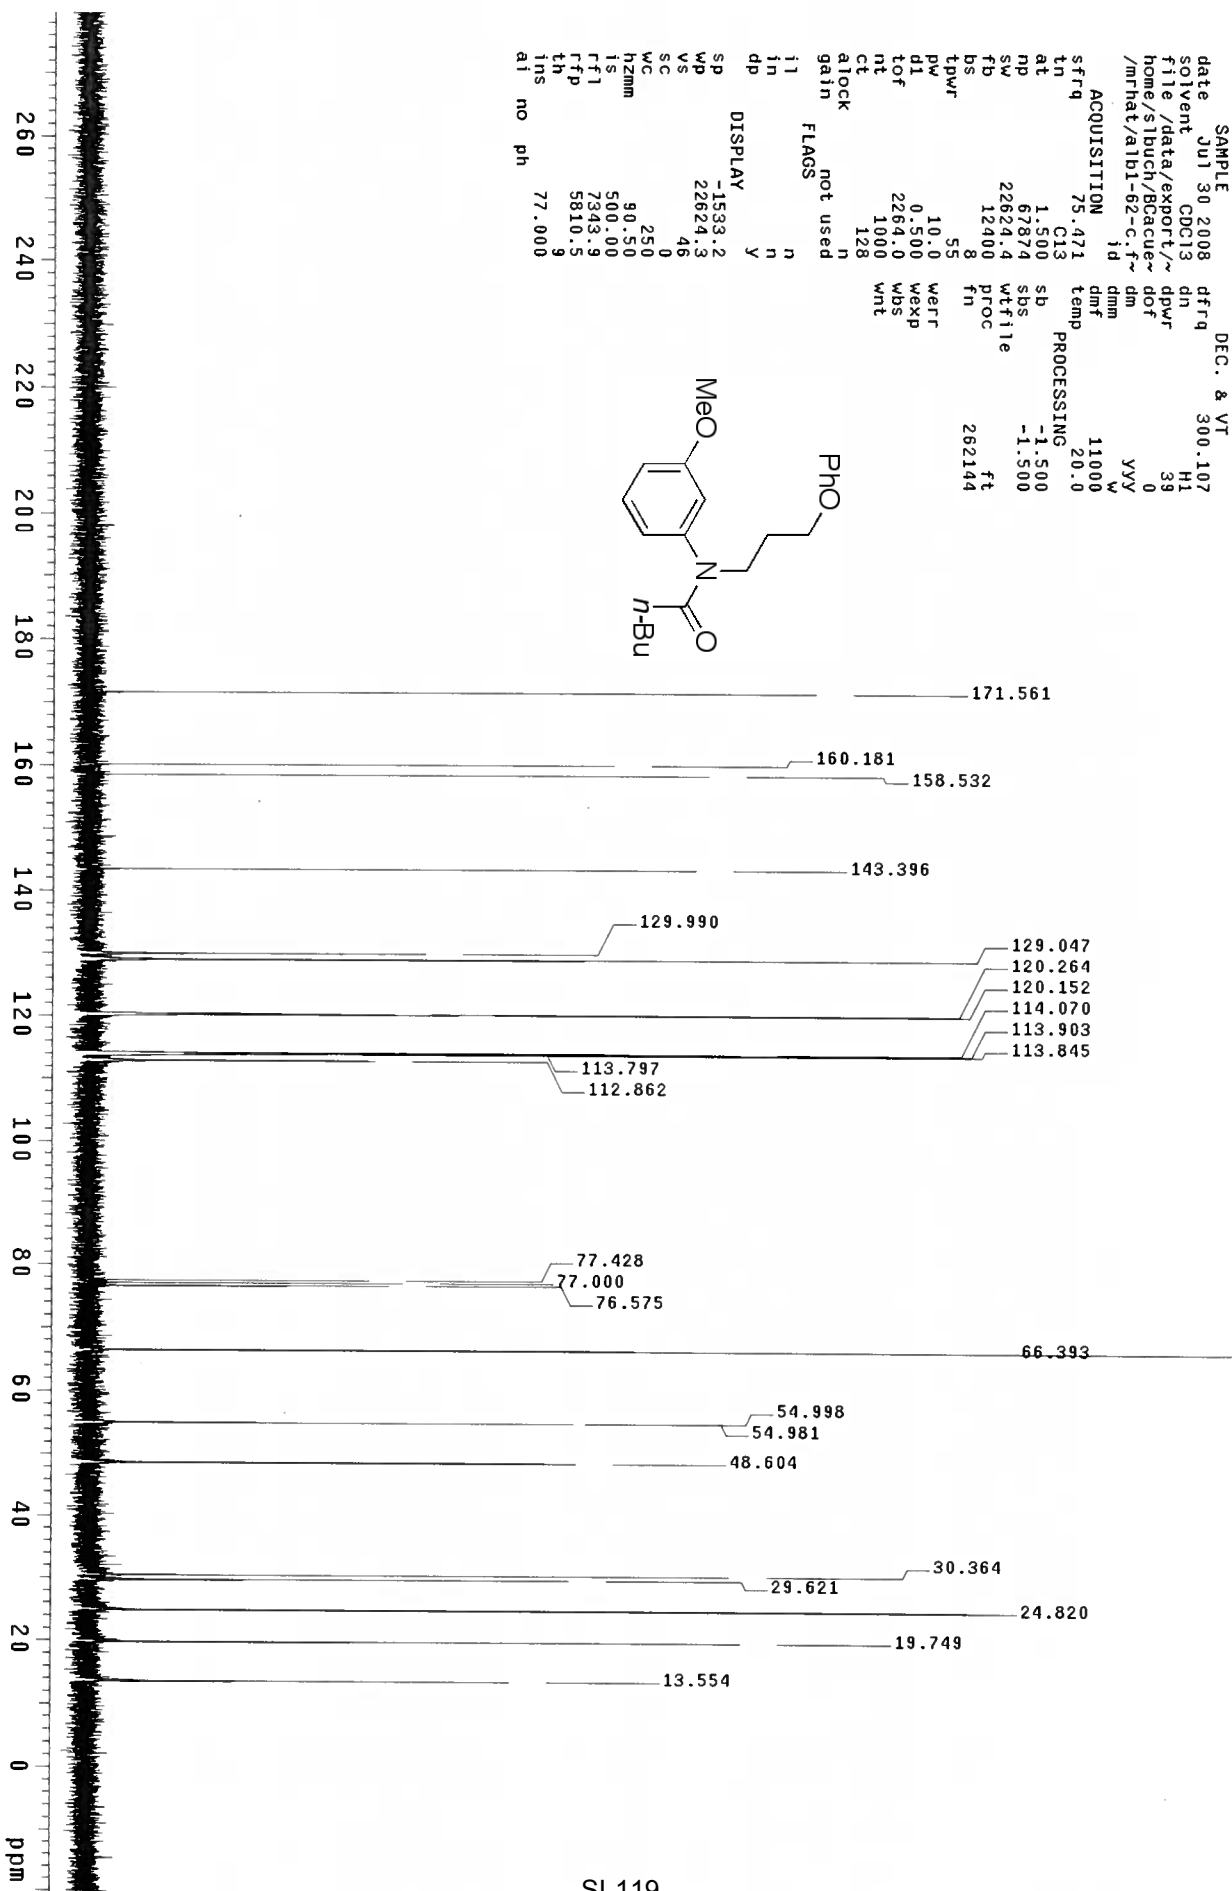

albl-126-n

expt std1h

SAMPLE DEC. & VT 300.107  
date Sep 8 2008 dfrq 300.107  
solvent CDC13 dn H1  
file /data/export/~ dpwr 30  
home/slbuch/Beacue~ dof 0  
/mhat/albl-126-n~ dm mm  
f1d c  
ACQUISITION 300.108 temp 20.0  
ft  
PROCCESSING 131072

INSTRUMENT  
sfrq 300.108  
tn H1  
at 4.003 wffile  
np 48052 proc  
sw 6002.4 fn  
fb not used  
bs 16 werr  
tpwr 54 wexp  
pw 3.0 wbs  
d1 0.050 wnt  
tof 867.7  
nt 8  
ct 8  
atlock not used  
gain n  
flags not used  
i1 n  
in n  
dp y  
DISPLAY -660.9  
sp 6002.3  
wp 151  
vs 0  
sc 250  
wc hzmm 24.01  
is 500.00  
rfi 661.0  
rfp 0  
th 6  
tms 3.000  
ph

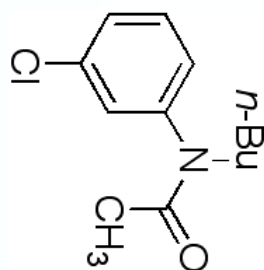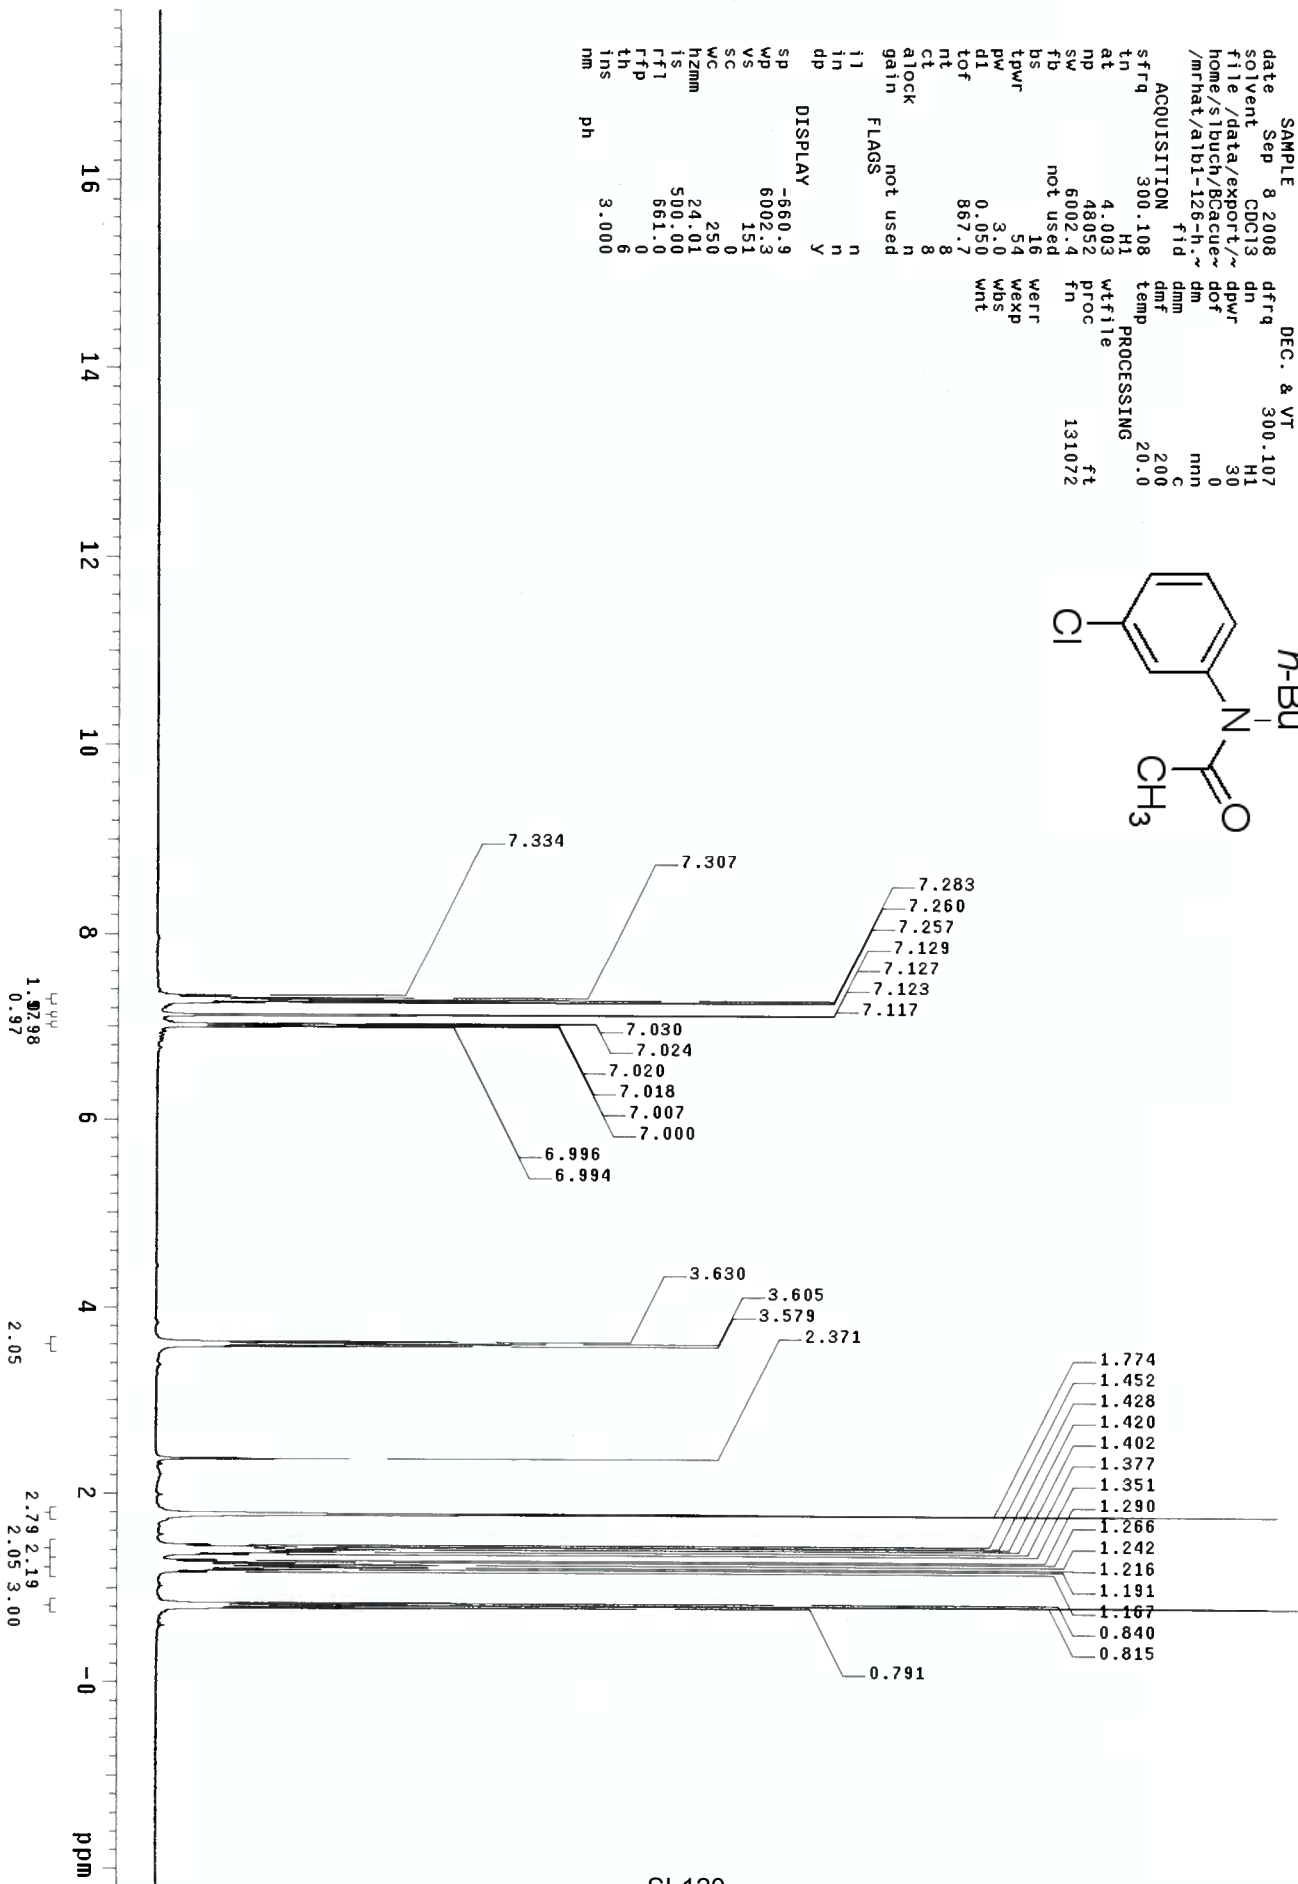

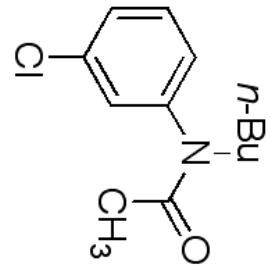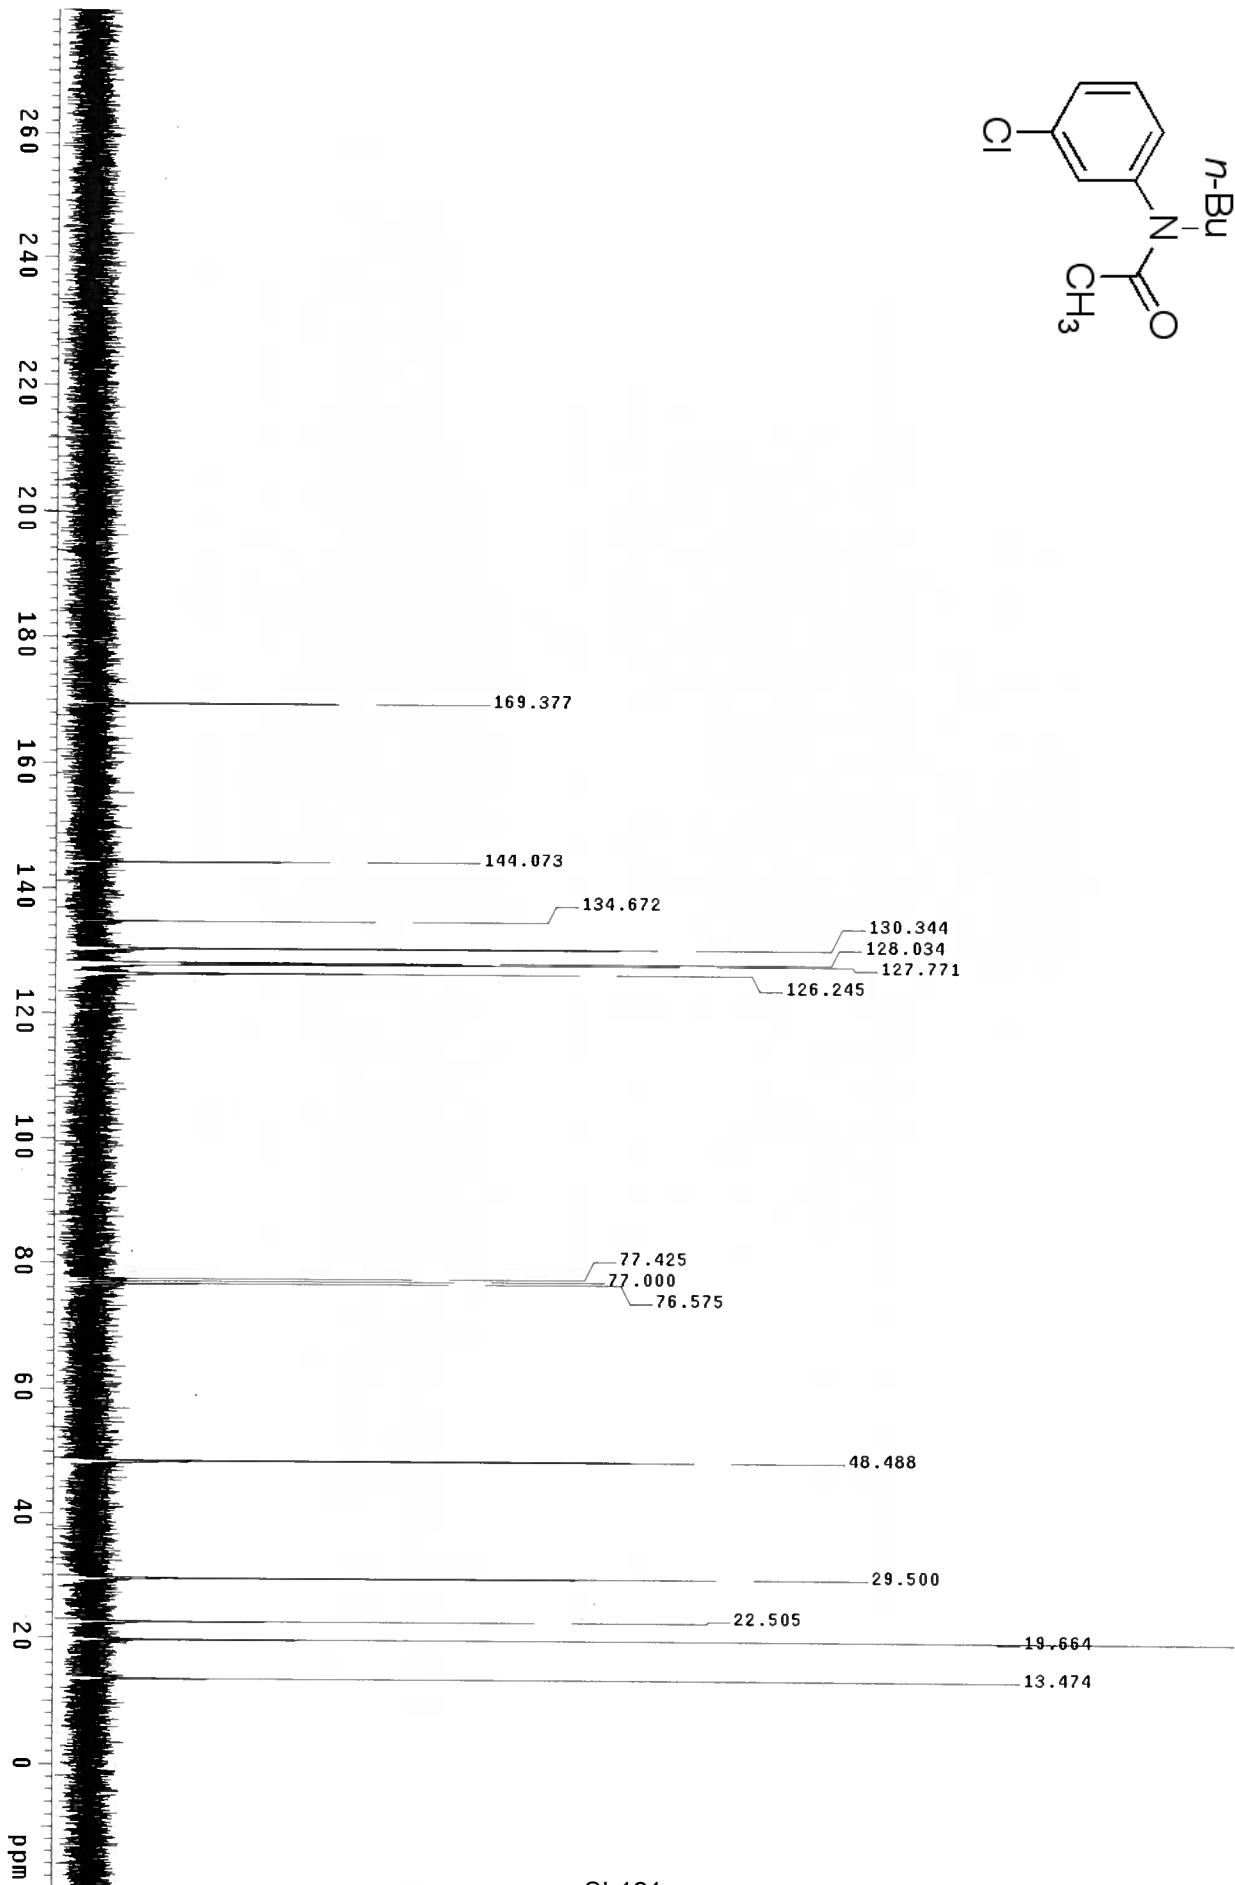

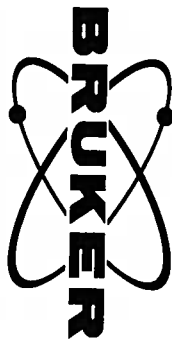

Current Data Parameters  
 NAME jdh-3-38  
 EXPNO 1  
 PROCNO 1

F2 - Acquisition Parameters  
 Date\_ 20081031  
 Time 18.23  
 INSTRUM spect  
 PROBHD 5 mm QNP 1H/13  
 PULPROG zg30  
 TD 65536  
 SOLVENT CDCl3  
 NS 16  
 DS 2  
 SFW 8278.146 Hz  
 FTDRS 0.126314 Hz  
 AQ 3.9584243 sec  
 RG 362  
 DW 60.400 usec  
 DE 6.00 usec  
 TE 291.2 K  
 D1 1.00000000 sec  
 TD0 1

==== CHANNEL f1 =====  
 NUC1 1H  
 P1 13.88 usec  
 PL1 0.00 dB  
 SFO1 400.1324710 MHz  
 F2 - Processing parameters  
 SI 65536  
 SF 400.1300096 MHz  
 WDW no  
 SSB 0  
 LB 0.00 Hz  
 GB 0  
 PC 1.00

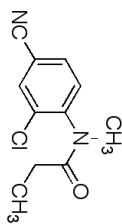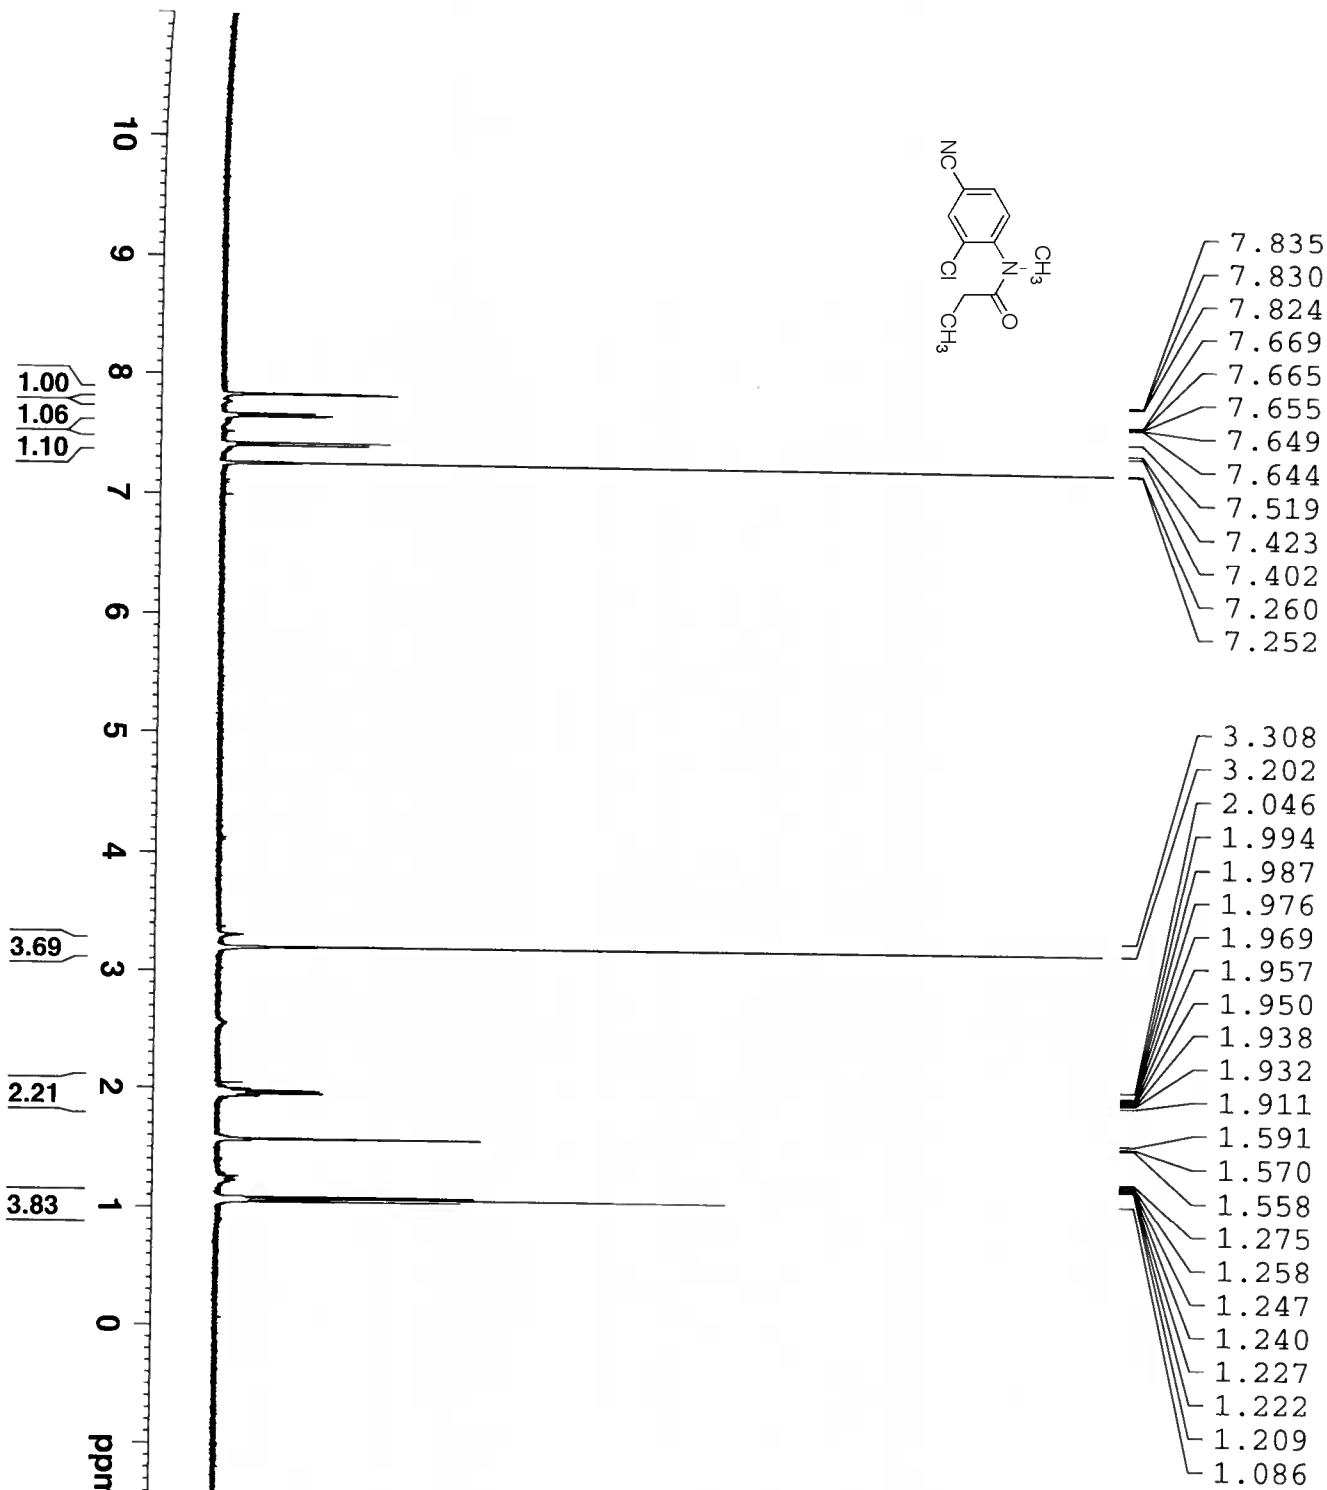

- 7.835
- 7.830
- 7.824
- 7.669
- 7.665
- 7.655
- 7.649
- 7.644
- 7.519
- 7.423
- 7.402
- 7.260
- 7.252

- 3.308
- 3.202
- 2.046
- 1.994
- 1.987
- 1.976
- 1.969
- 1.957
- 1.950
- 1.938
- 1.932
- 1.911
- 1.591
- 1.570
- 1.558
- 1.275
- 1.258
- 1.247
- 1.240
- 1.227
- 1.222
- 1.209
- 1.086

1.00  
1.06  
1.10

3.69

2.21

3.83

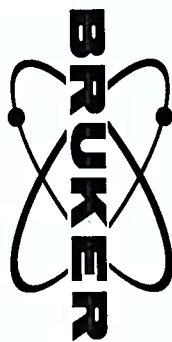

Current Data Parameters  
 NAME jdh-3-257-2-c13  
 EXPNO 1  
 PROCNO 1

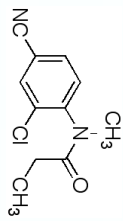

- 172.90
- 145.55
- 134.47
- 134.16
- 131.99
- 130.92
- 116.58
- 113.53
- 77.32
- 77.20
- 77.00
- 76.69
- 35.59
- 30.20
- 27.37
- 9.20

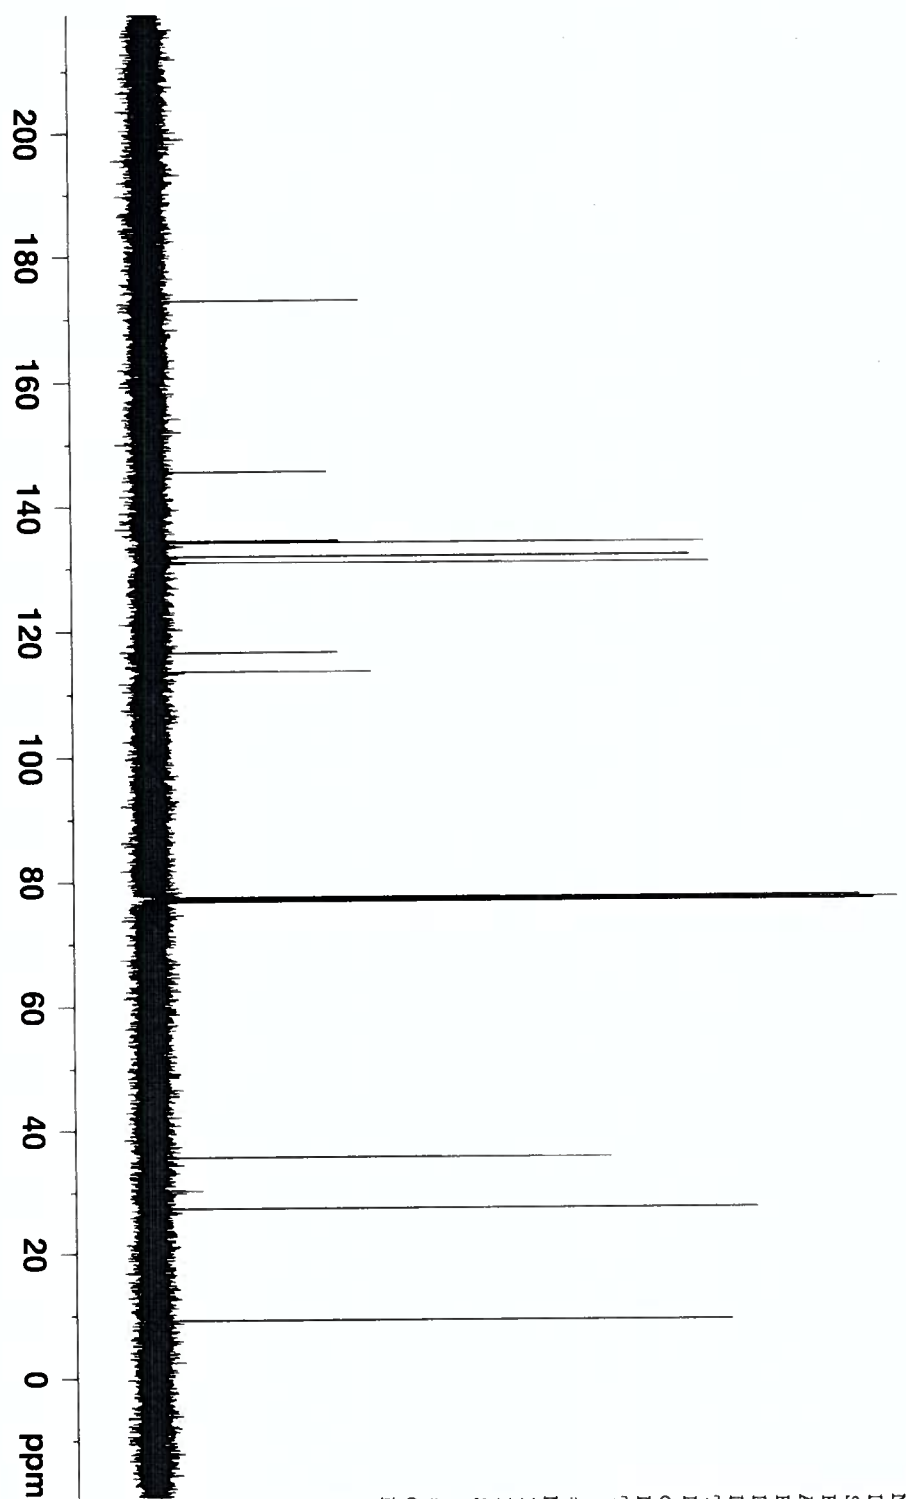

F2 - Acquisition Parameters  
 Date\_ 20090416  
 Time 18.43  
 INSTRUM spect  
 PROBHD 5 mm BBO BB-1H  
 PULPROG zgpg30  
 TD 65536  
 SOLVENT CDCl3  
 NS 256  
 DS 2  
 SWH 23980.814 Hz  
 FIDRES 0.365918 Hz  
 AQ 1.3664756 sec  
 RG 16384  
 DW 20.850 usec  
 DE 6.00 usec  
 TE 293.2 K  
 DI 2.0000000 sec  
 D1 0.0300000 sec  
 DELTA 1.89999998 sec  
 TD0 1

==== CHANNEL f1 =====  
 NUC1 13C  
 P1 8.75 usec  
 PL1 -3.00 dB  
 SFO1 100.6228298 MHz

==== CHANNEL f2 =====  
 CPDPRG2 waltz16  
 NUC2 1H  
 PCPD2 90.00 usec  
 PL2 -1.00 dB  
 PL12 14.52 dB  
 PL13 18.00 dB  
 SFO2 400.1316005 MHz

F2 - Processing parameters  
 SI 65536  
 SF 100.6127792 MHz  
 WDW no  
 SSB 0  
 LB 0.00 Hz  
 GB 0  
 PC 1.40

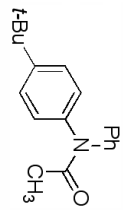

- 7.367
- 7.349
- 7.289
- 7.286
- 7.268
- 7.260
- 7.259
- 7.201
- 7.194
- 7.189
- 7.178
- 7.172

- 2.056
- 1.332
- 1.302

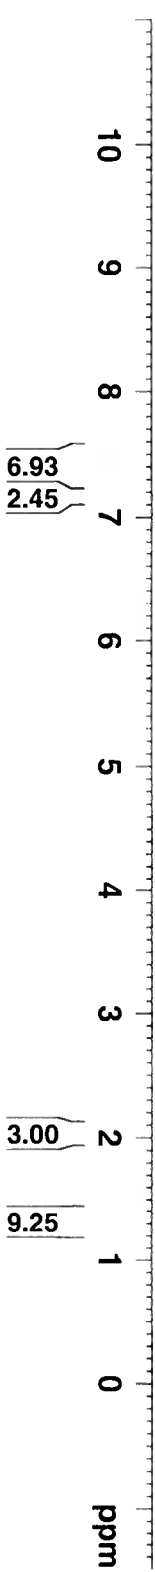

```

Current Data Parameters
NAME          jdh-3-260-2
EXPNO         1
PROCNO        1

F2 - Acquisition Parameters
Date_         20090416
Time          11.34
INSTRUM       spect
PROBHD        5 mm BBO BB-1H
PULPROG       zg30
TD            65536
SOLVENT       CDCl3
NS            16
DS            2
SWH           8278.146
FIDRES        0.126314
AQ            3.9584243
RG            128
DE            60.400
TE            293.2
D1            1.00000000
TD0           1

===== CHANNEL f1 =====
NUC1          1H
P1            15.07
PL1           0.00
SF01         400.1324710

F2 - Processing parameters
SI            65536
SF            400.1300096
WDW           no
SSB           0
LB            0.00
GB            0
PC            1.00
  
```



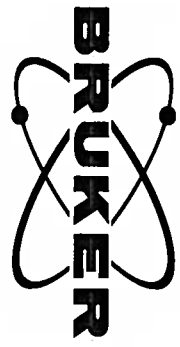

Current Data Parameters  
 NAME jdh-3-260-cl3-2  
 EXPNO 1  
 PROCNO 1

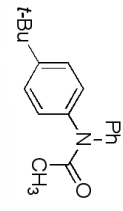

170.26  
 129.41  
 128.64  
 128.24  
 127.63  
 126.29  
 125.64

77.31  
 76.99  
 76.68

34.29  
 31.25  
 31.09  
 23.63  
 23.61

F2 - Acquisition Parameters

Date\_ 20090416  
 Time 11.57  
 INSTRUM spect  
 PROBHD 5 mm BBO BB-1H  
 PULPROG zgpg30  
 TD 65536  
 SOLVENT CDCl3  
 NS 257  
 DS 2  
 SWH 23980.814 Hz  
 FIDRES 0.365918 Hz  
 AQ 1.3664756 sec  
 RG 8192  
 DW 20.850 usec  
 DE 6.00 usec  
 TE 293.2 K  
 D1 2.00000000 sec  
 d11 0.03000000 sec  
 DELTA 1.89999998 sec  
 TD0 1

==== CHANNEL f1 =====

NUC1 13C  
 P1 8.75 usec  
 PL1 -3.00 dB  
 SFO1 100.6228298 MHz

==== CHANNEL f2 =====

CPDPRG2 waltz16  
 NUC2 1H  
 PCPD2 90.00 usec  
 PL2 -1.00 dB  
 PL12 14.52 dB  
 PL13 18.00 dB  
 SFO2 400.1316005 MHz

F2 - Processing parameters

SI 65536  
 SF 100.6127980 MHz  
 MDW no  
 SSB 0  
 LB 0.00 Hz  
 GB 0  
 PC 1.40

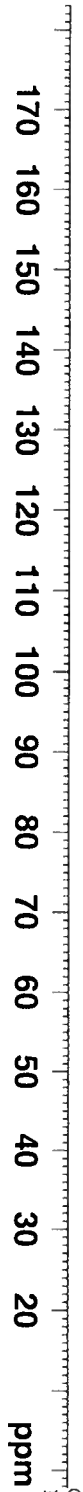

Current Data Parameters  
 NAME jdh-2-249-2  
 EXPNO 1  
 PROCNO 1

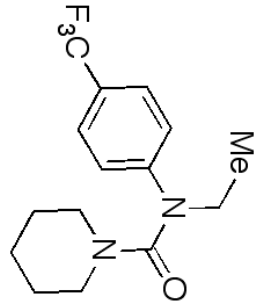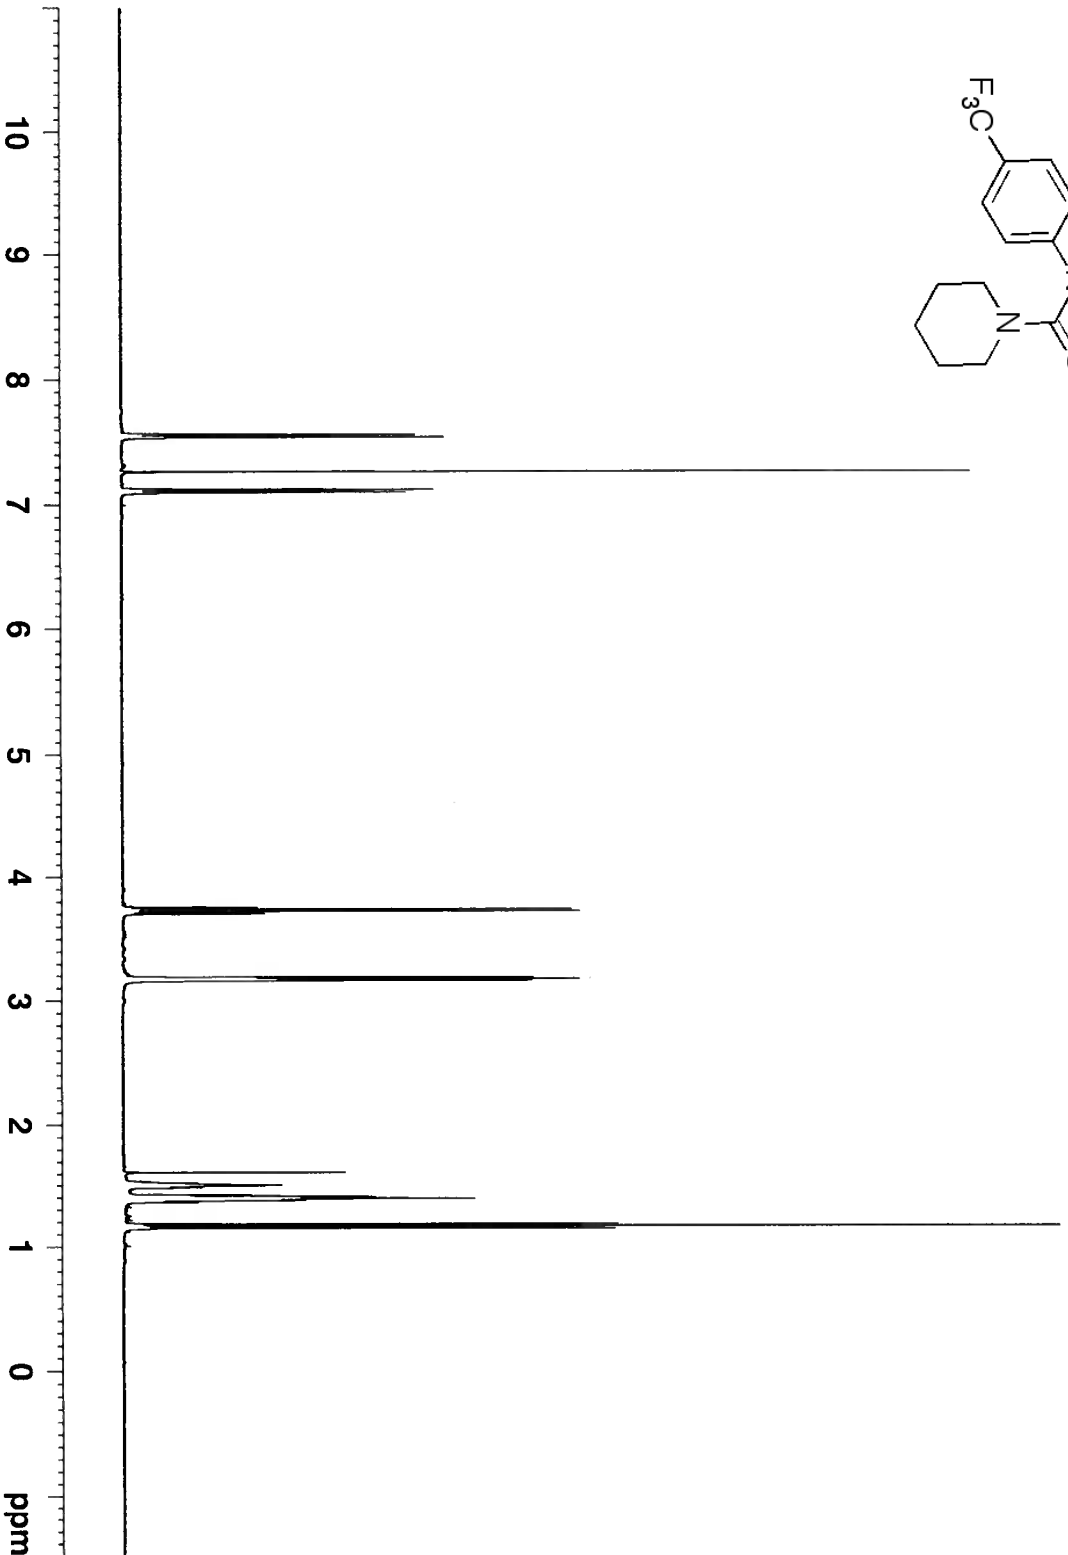

F2 - Acquisition Parameters  
 Date\_ 20080917  
 Time 12.05  
 INSTRUM spect  
 PROBHD 5 mm BBO BB-1H  
 PULPROG zg30  
 TD 65536  
 SOLVENT CDCl3  
 NS 16  
 DS 2  
 SWH 8278.146  
 FIDRES 0.126314  
 AQ 3.9584243  
 RG 181  
 DW 60.400  
 DE 6.00  
 TE 293.2  
 D1 1.00000000  
 TD0 1

==== CHANNEL f1 ====

NUC1 1H  
 P1 15.07  
 PL1 0.00  
 SFO1 400.1324710

F2 - Processing parameters  
 SI 65536  
 SF 400.1300097  
 WDW no  
 SSB 0  
 LB 0.00  
 GB 0  
 PC 1.00

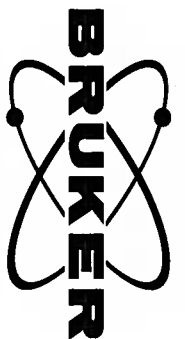

Current Data Parameters  
NAME jdh-2-249-cl3  
EXENO 1  
PROCNO 1

F2 - Acquisition Parameters  
Date\_ 20080917  
Time 12.23

INSTRUM spect  
PROBHD 5 mm BBO BB-1H  
PULPROG zgpg30  
TD 65536  
SOLVENT CDCl3  
NS 256  
DS 2  
SWH 23980.814 Hz  
FIDRES 0.365918 Hz  
AQ 1.3664756 sec  
RG 8192  
DW 20.850 usec  
DE 6.00 usec  
TE 293.2 K  
DI 2.00000000 sec  
d11 0.03000000 sec  
DELTA 1.89999998 sec  
TD0 1

==== CHANNEL F1 =====  
NUC1 13C  
P1 8.75 usec  
PL1 -3.00 dB  
SFO1 100.6228298 MHz

==== CHANNEL F2 =====  
CPDPRG2 waltz16  
NUC2 1H  
PCPD2 90.00 usec  
PL2 -1.00 dB  
PL12 14.52 dB  
PL13 18.00 dB  
SFO2 400.1316005 MHz

F2 - Processing parameters  
SI 65536  
SF 100.6127741 MHz  
WDW no  
SSB 0  
LB 0.00 Hz  
GB 0  
PC 1.40

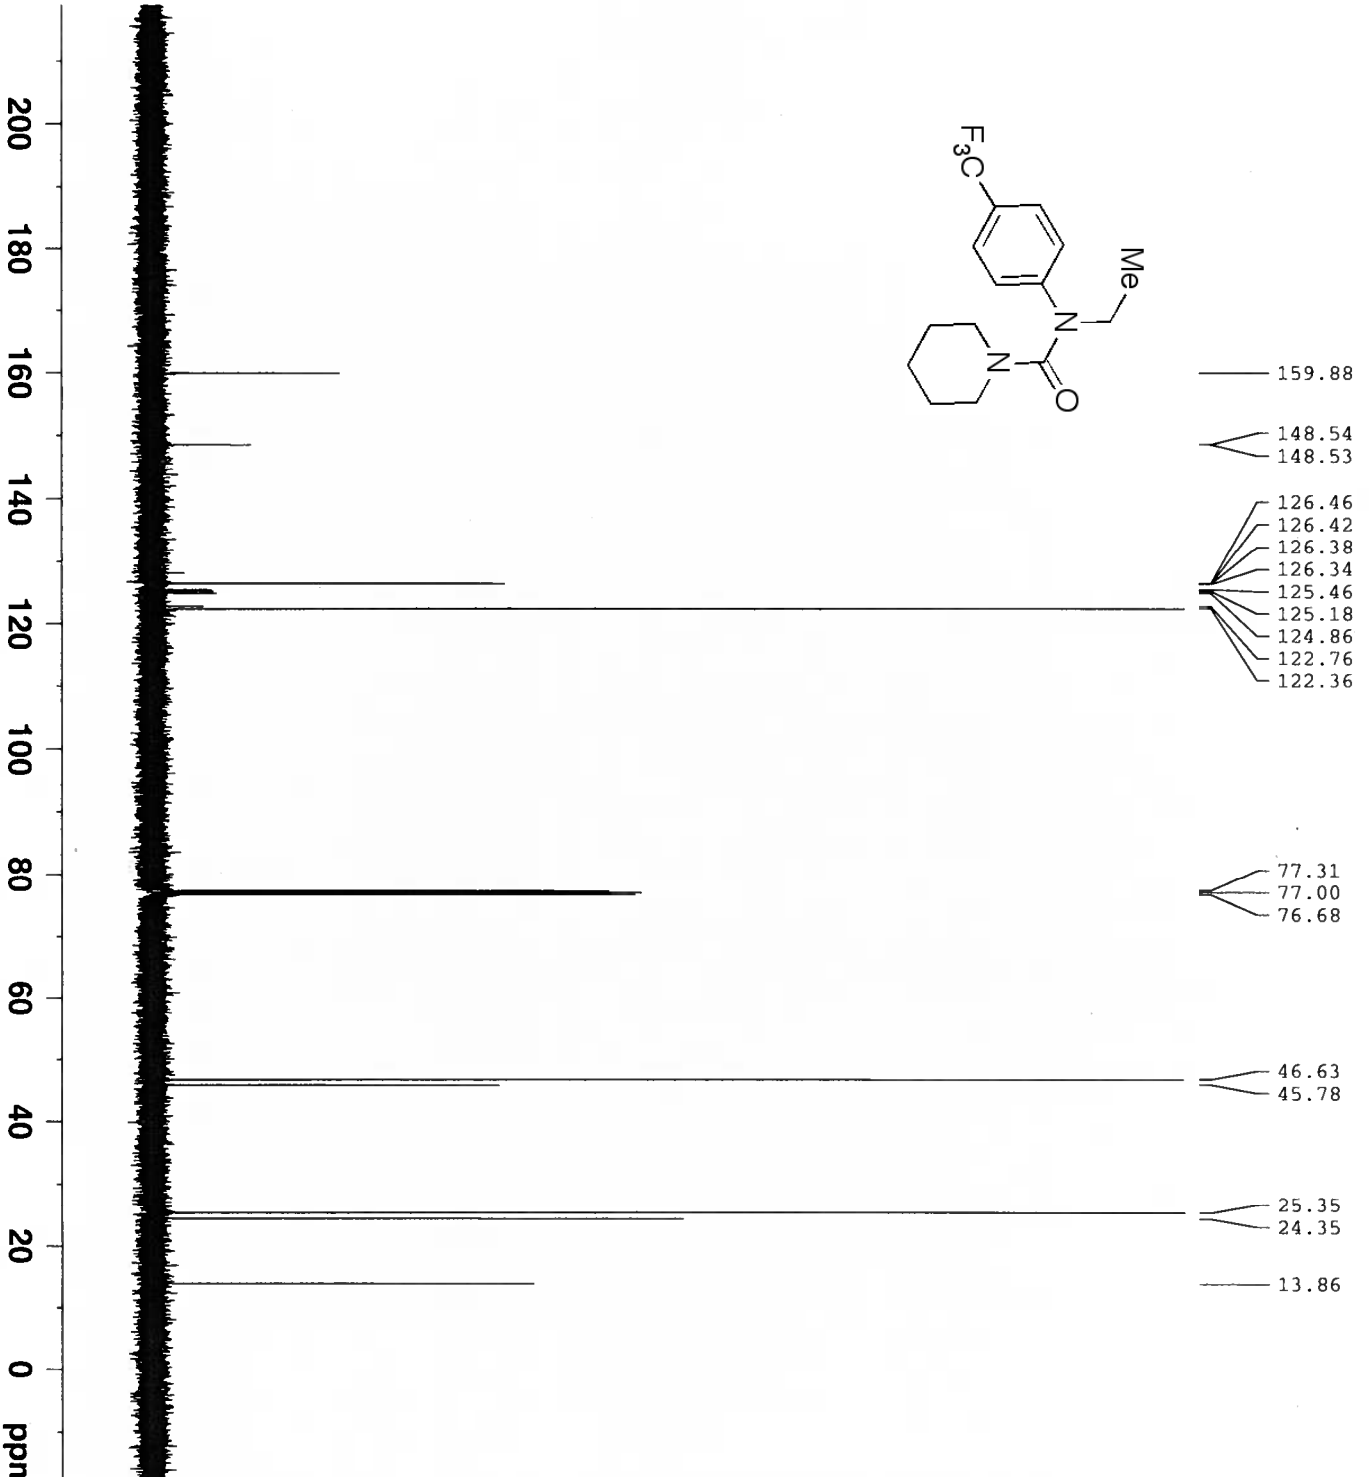

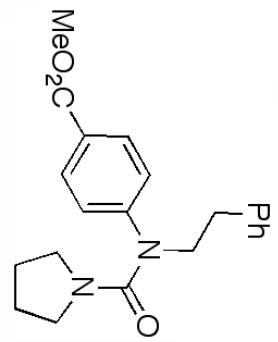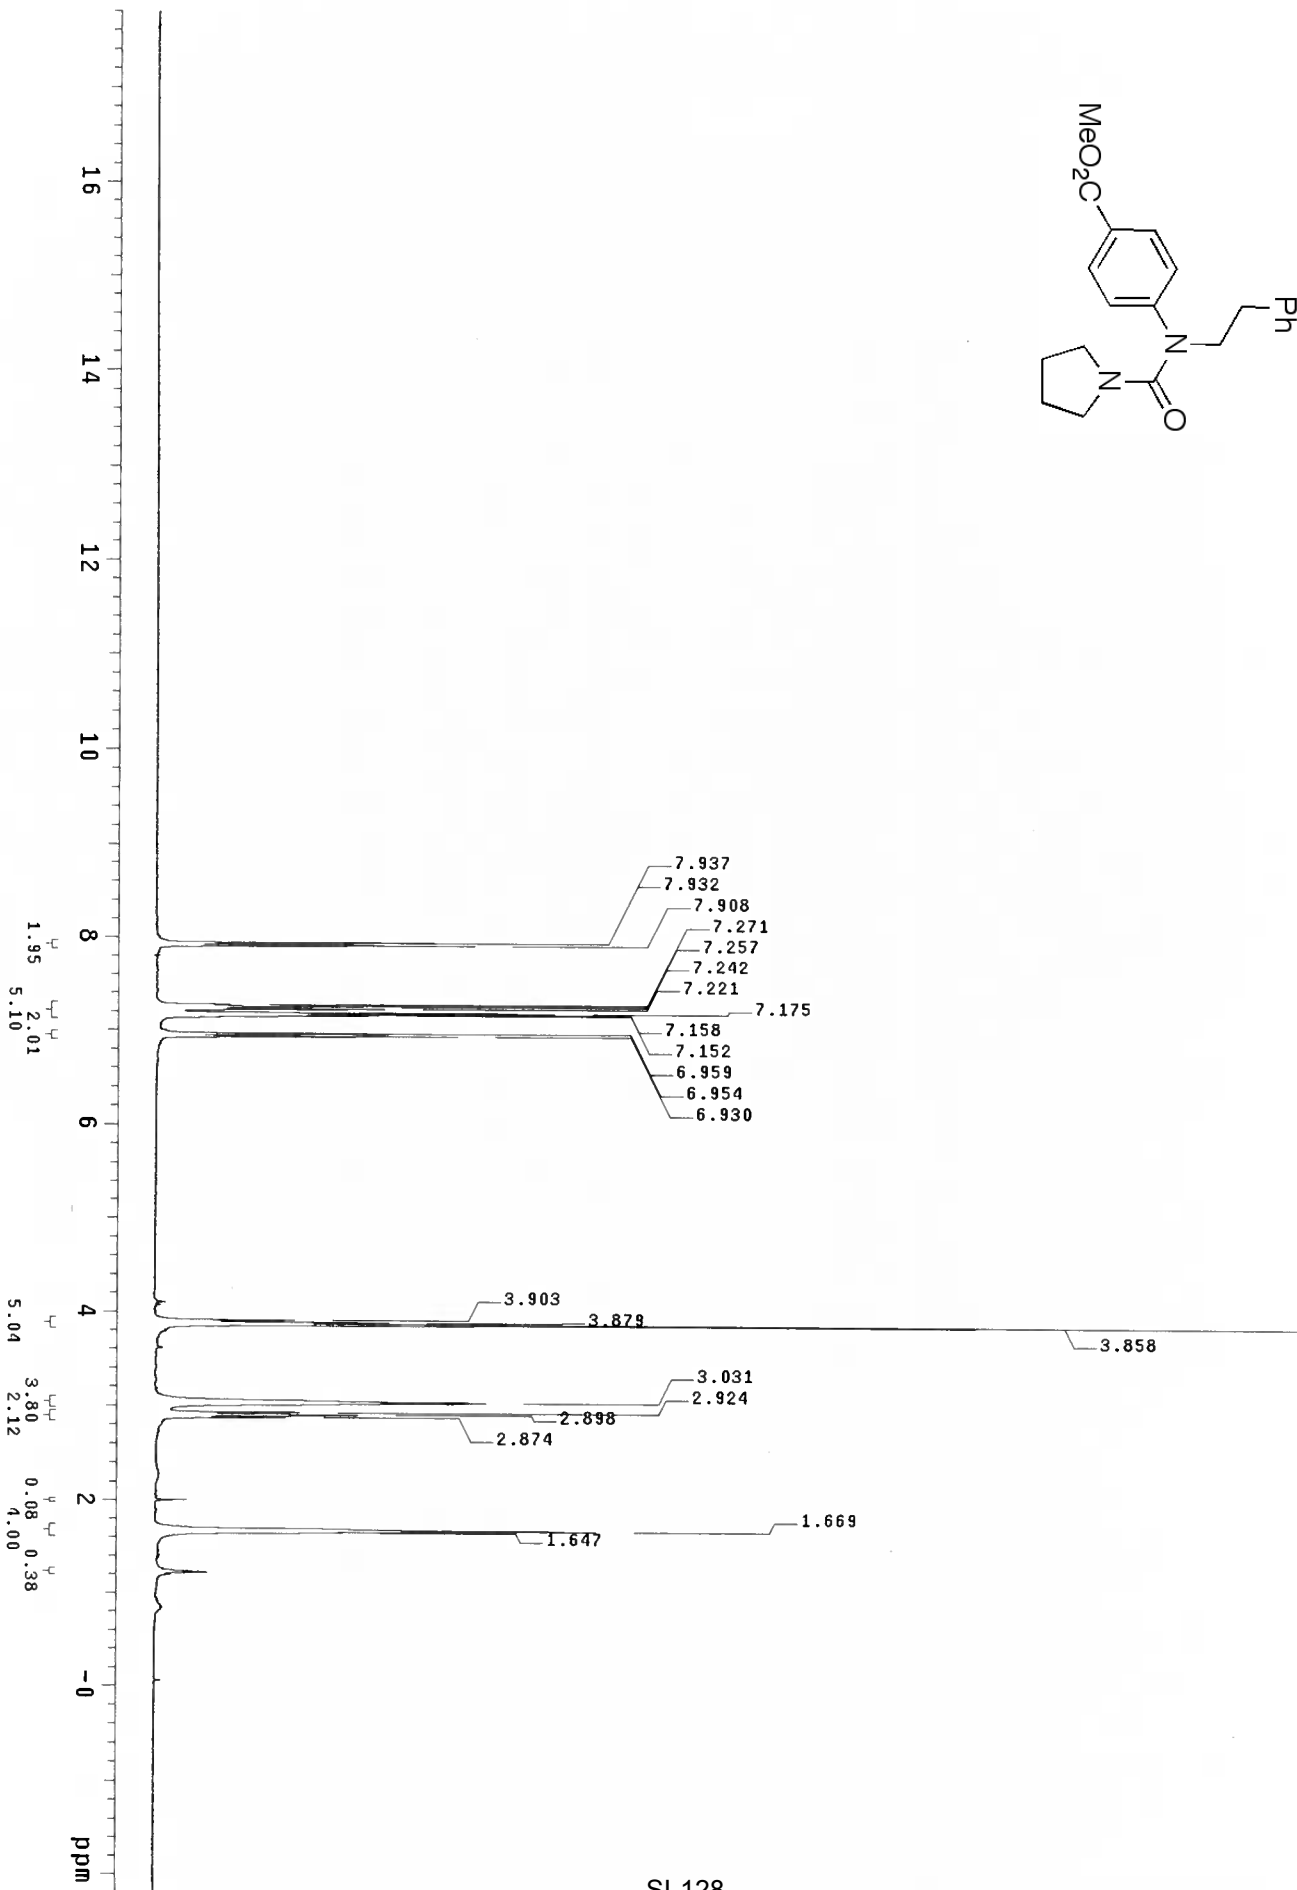

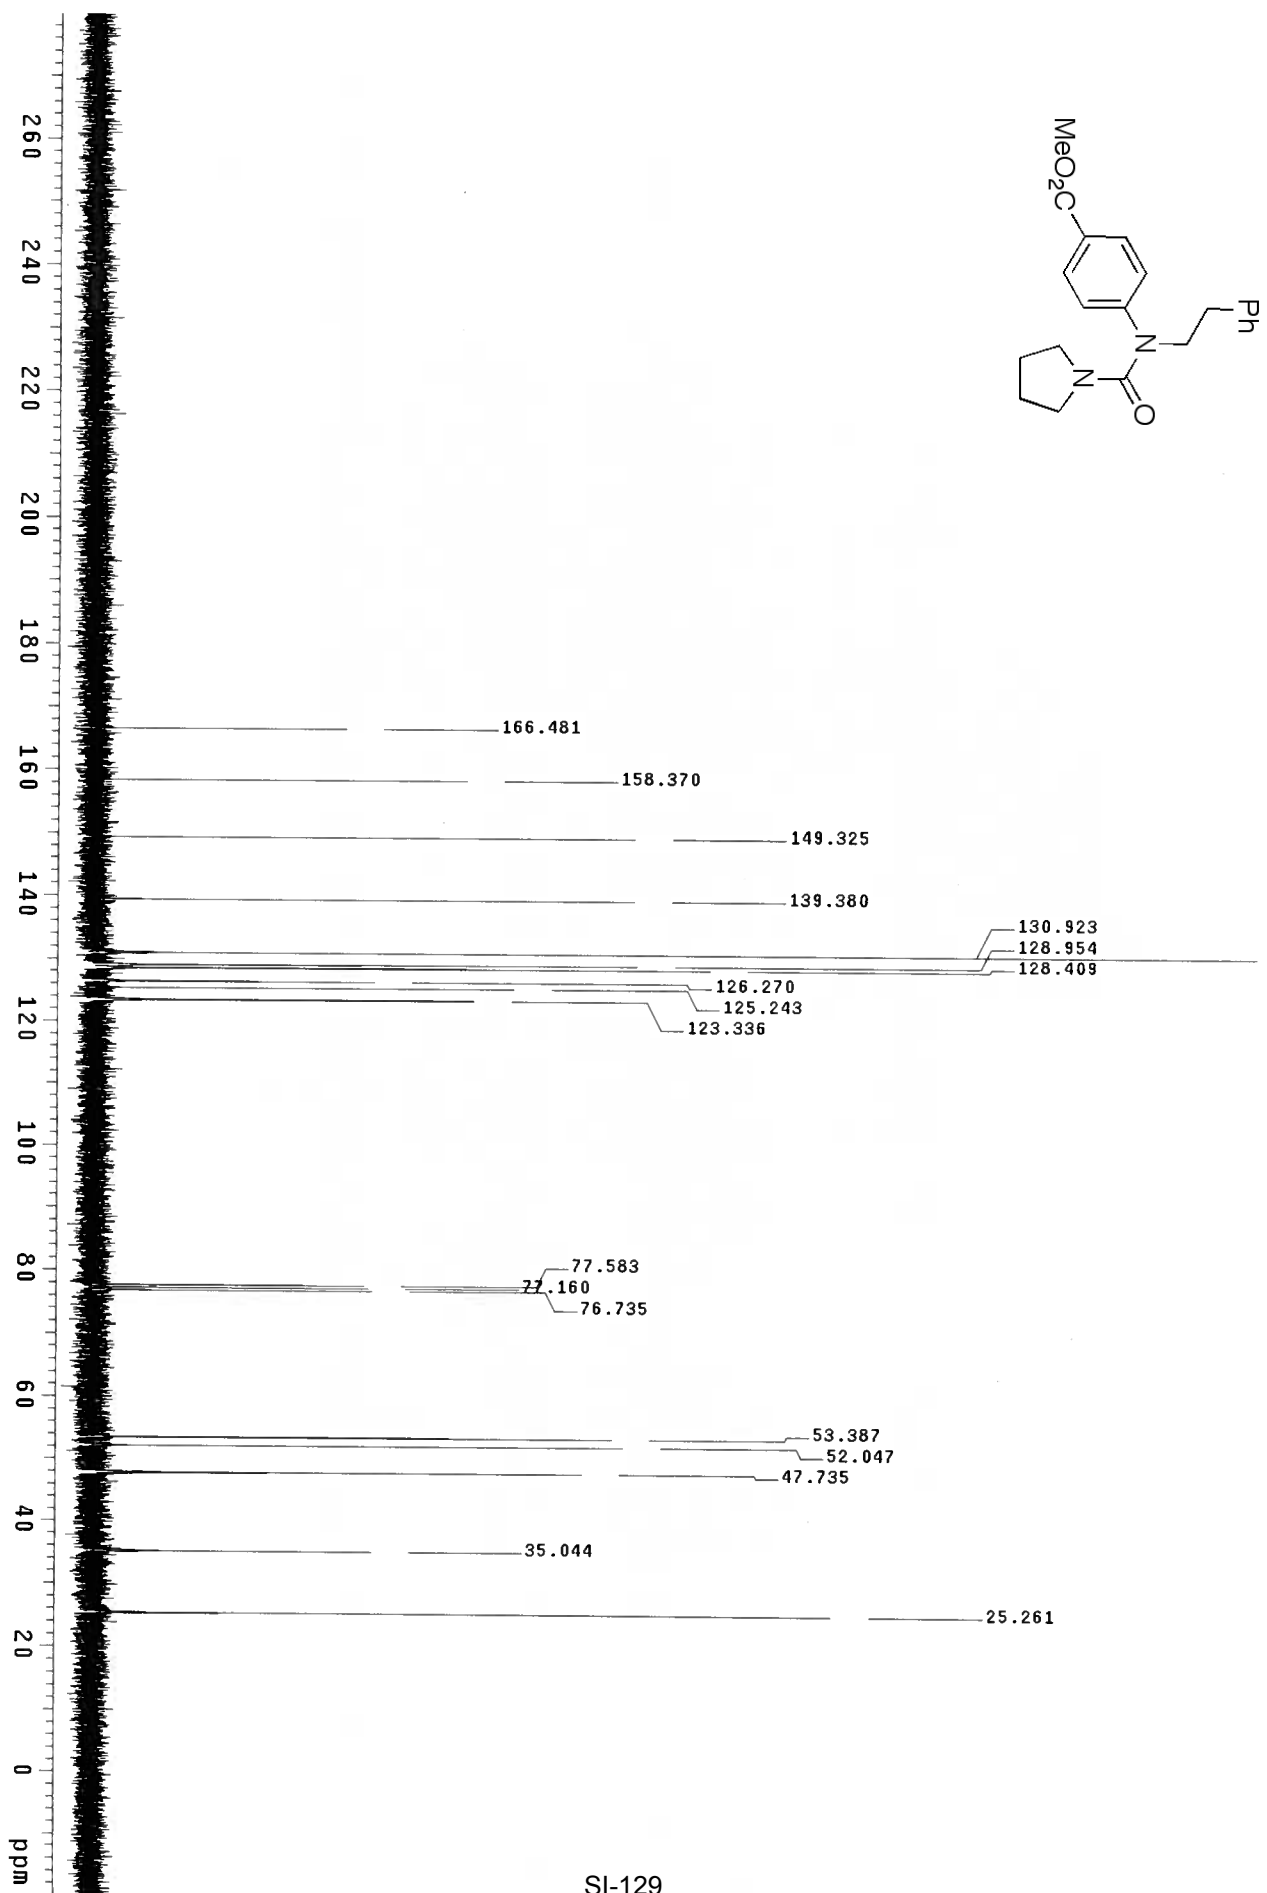

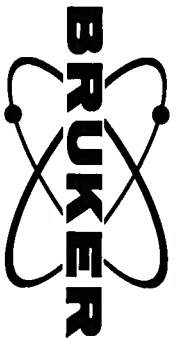

Current Data Parameters  
 NAME jdh-2-278  
 EXPNO 1  
 PROCNO 1

F2 - Acquisition Parameters  
 Date\_ 20080927  
 Time 17.32  
 INSTRUM spect  
 PROBHID 5 mm QNP 1H/13  
 PULPROG zg30  
 TD 65536  
 SOLVENT CDCl3  
 NS 16  
 DS 2  
 SWH 8278.146 Hz  
 FIDRES 0.126314 Hz  
 AQ 3.9584243 sec  
 RG 362  
 DW 60.400 usec  
 DE 6.00 usec  
 TE 291.2 K  
 D1 1.00000000 sec  
 TD0 1

==== CHANNEL f1 =====  
 NUC1 1H  
 P1 13.88 usec  
 PL1 0.00 dB  
 SF01 400.1324710 MHz  
 F2 - Processing parameters  
 SI 65536  
 SF 400.1300093 MHz  
 WDW no  
 SSB 0  
 LB 0.00 Hz  
 GB 0  
 PC 1.00

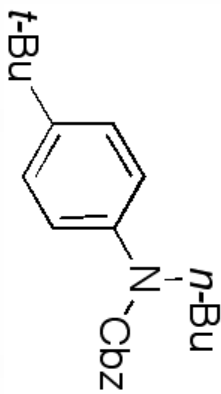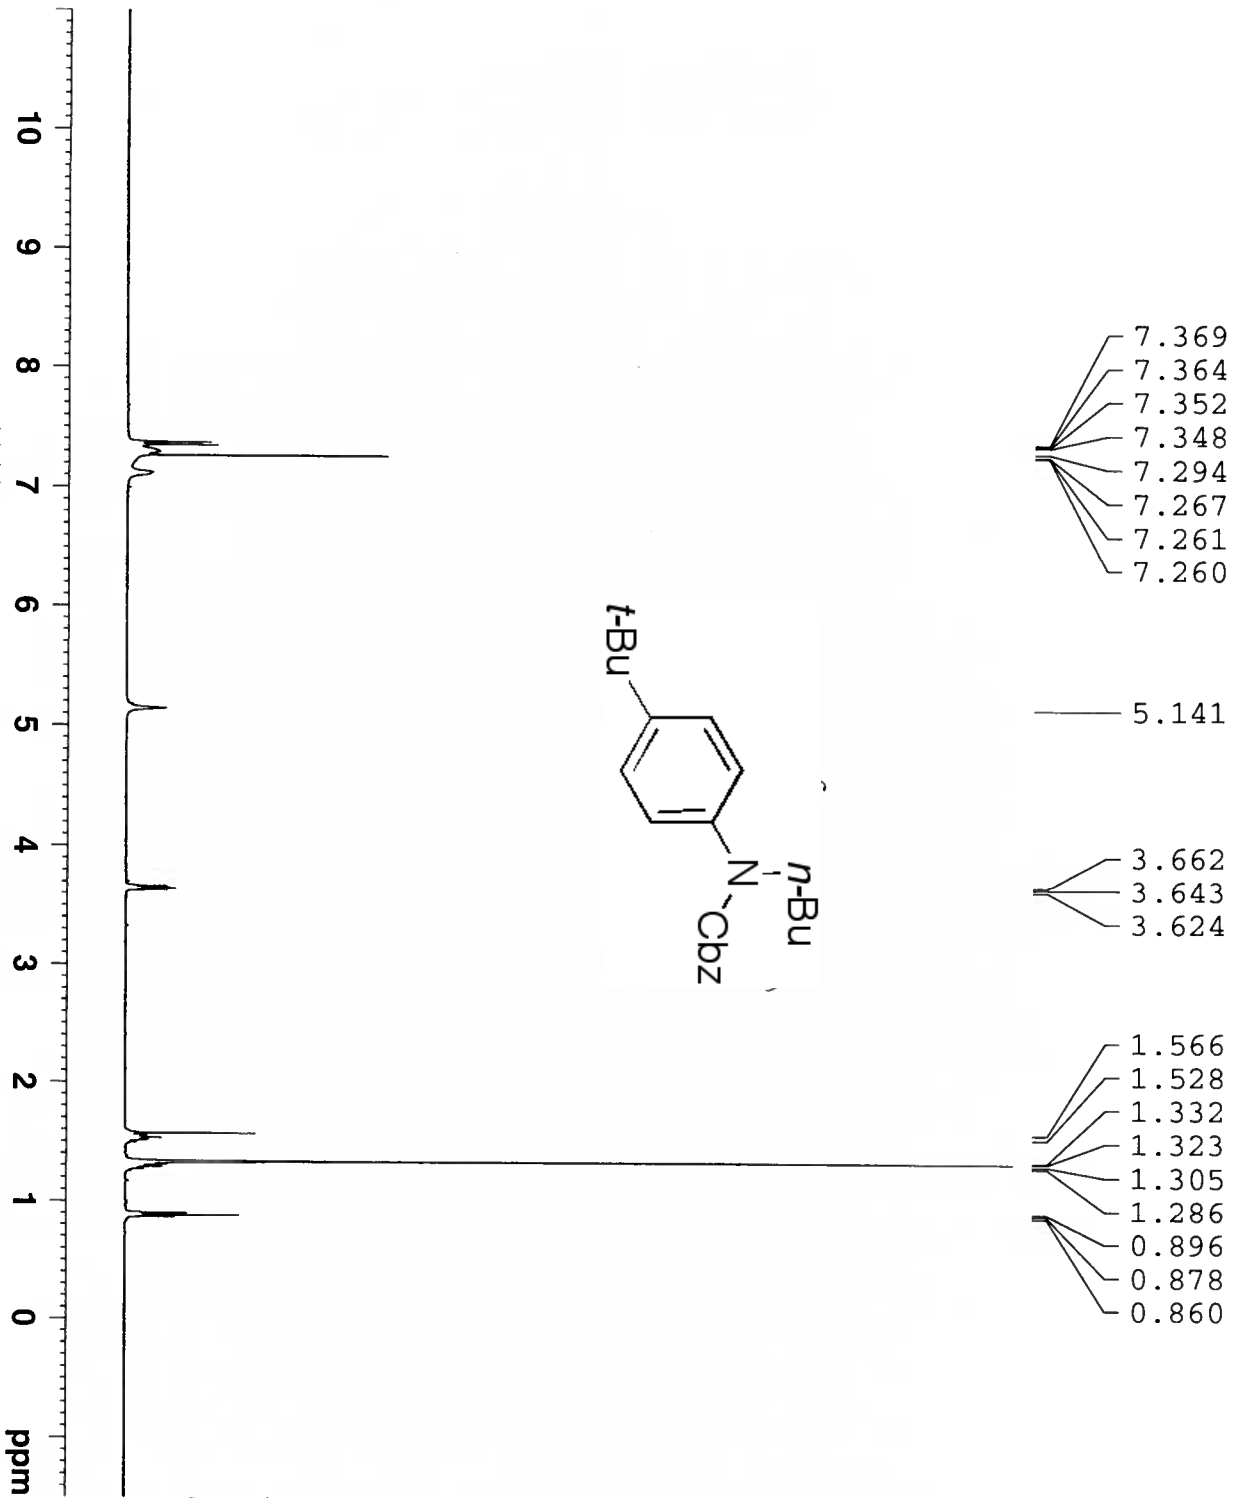

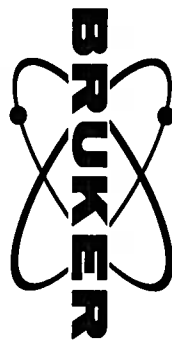

Current Data Parameters  
 NAME jdh-2-278-2-c13  
 EXPNO 1  
 PROCNO 1

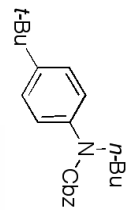

- 155.40
- 136.80
- 128.43
- 128.18
- 127.55
- 127.26
- 126.61
- 125.68
- 77.32
- 77.00
- 76.68
- 66.73
- 50.16
- 34.35
- 34.34
- 31.23
- 30.30
- 19.74
- 13.68

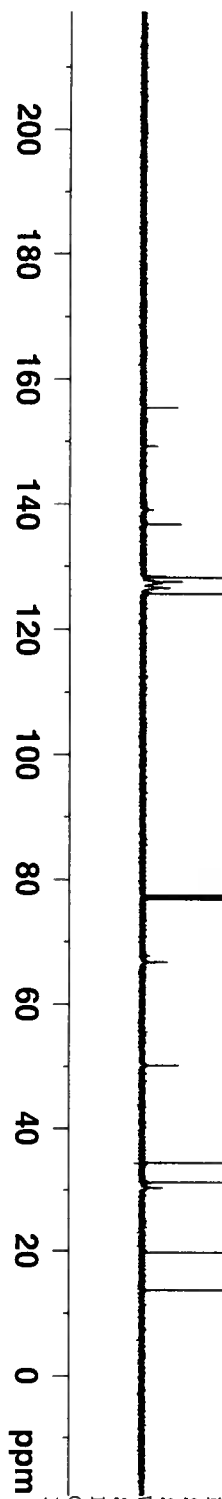

F2 - Acquisition Parameters

Date\_ 20080929  
 Time 16.48  
 INSTRUM spect  
 PROBHID 5 mm BBO BB-1H  
 PULPROG zgpg30  
 TD 65536  
 SOLVENT CDCl3  
 NS 184  
 DS 2  
 SWH 23980.814 Hz  
 FIDRES 0.365918 Hz  
 AQ 1.3664756 sec  
 RG 5792.6  
 DW 20.850 usec  
 DE 6.00 usec  
 TE 293.2 K  
 D1 2.00000000 sec  
 d11 0.03000000 sec  
 DELTA 1.89999998 sec  
 TD0 1

==== CHANNEL f1 =====

NUC1 13C  
 P1 8.75 usec  
 PL1 -3.00 dB  
 SFO1 100.6228298 MHz

==== CHANNEL f2 =====

CPDPRG2 waltz16  
 NUC2 1H  
 PCPD2 90.00 usec  
 PL2 -1.00 dB  
 PL12 14.52 dB  
 PL13 18.00 dB  
 SFO2 400.1316005 MHz

F2 - Processing parameters

SI 65536  
 SF 100.6127905 MHz  
 MDM no  
 SSB 0  
 LB 0.00 Hz  
 GB 0  
 PC 1.40

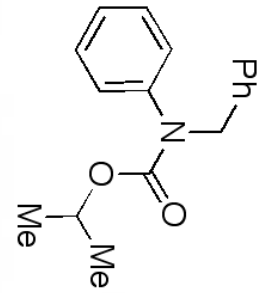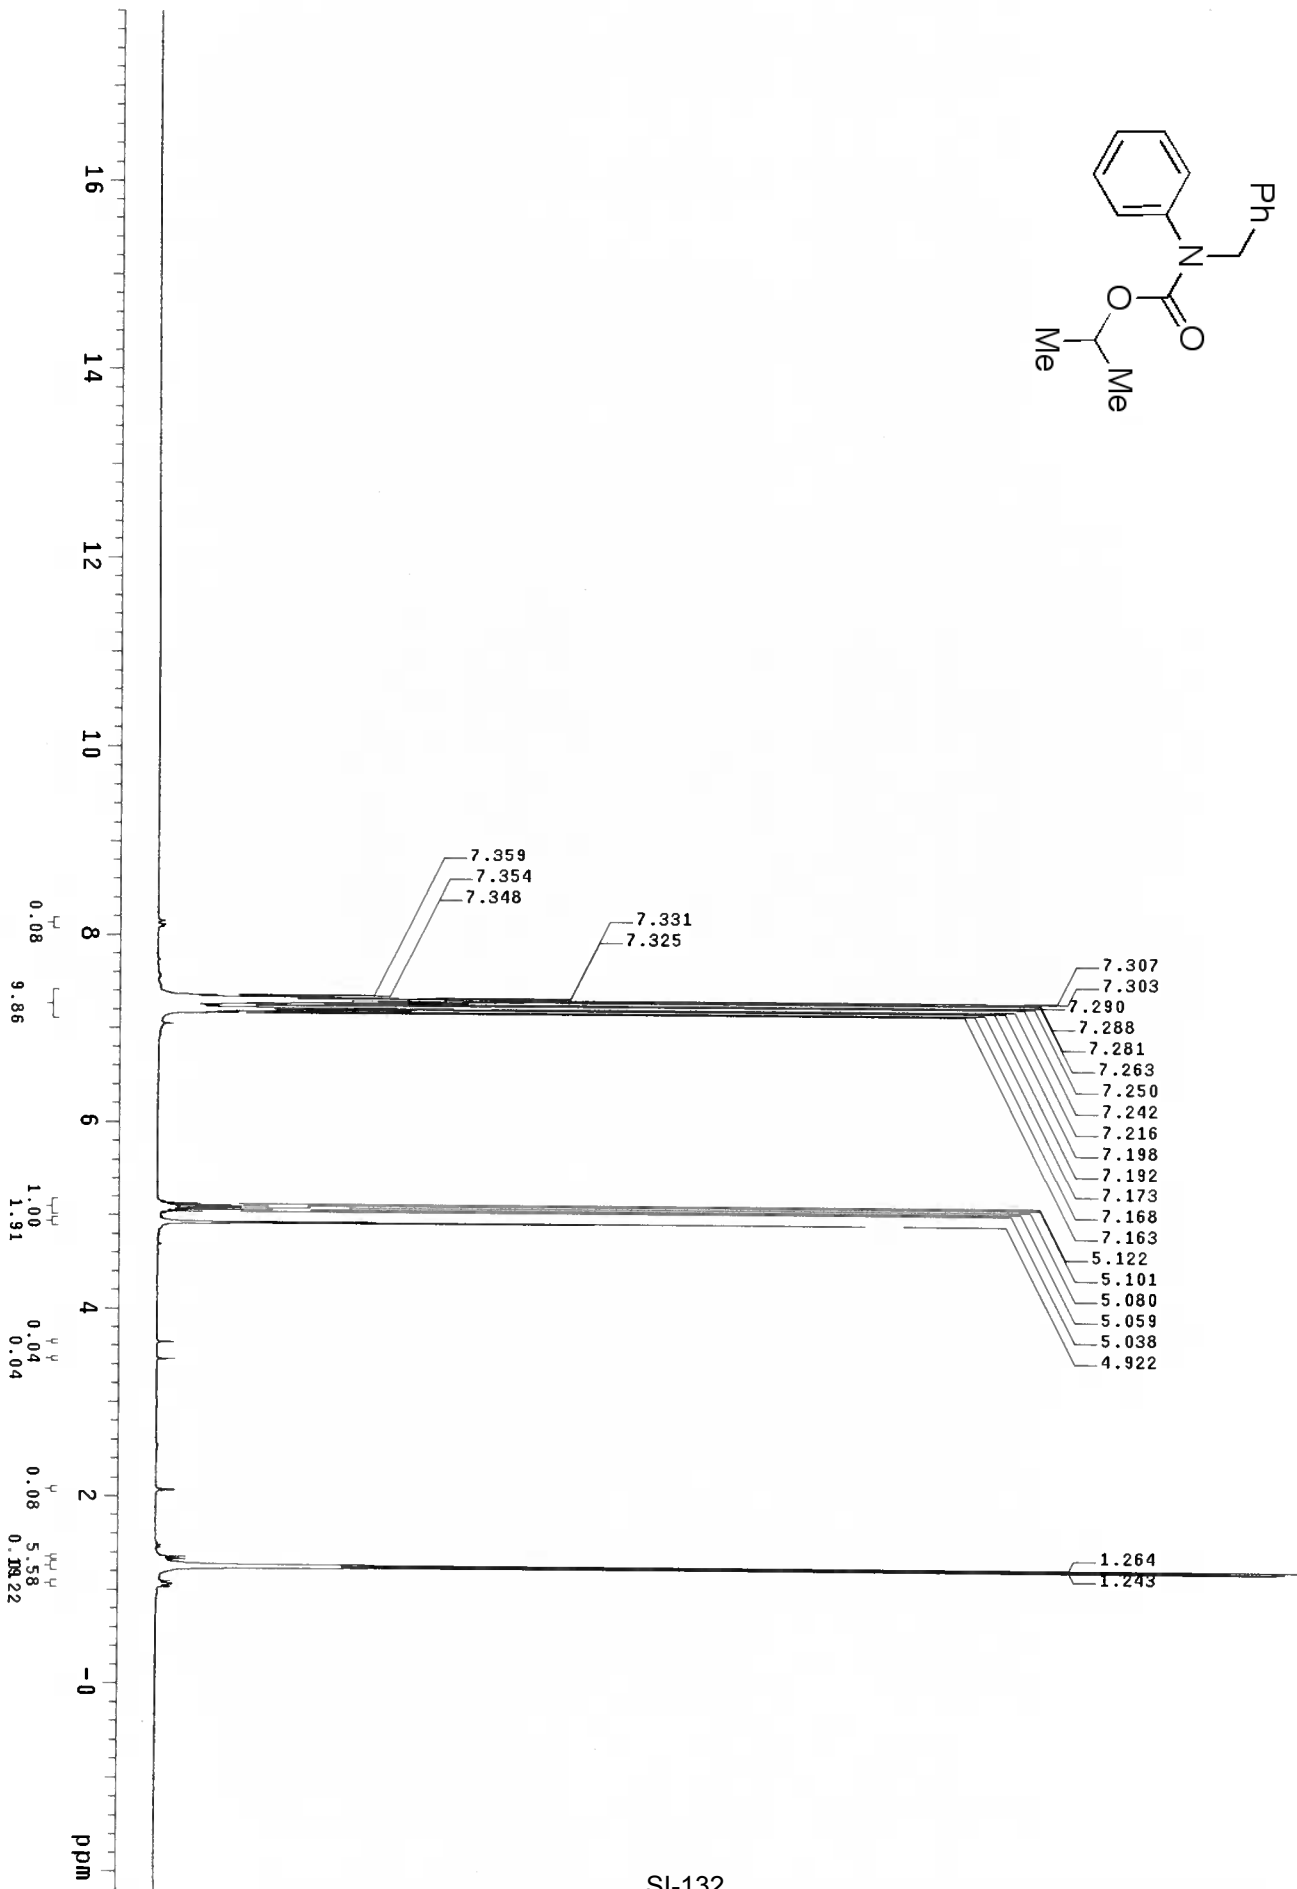



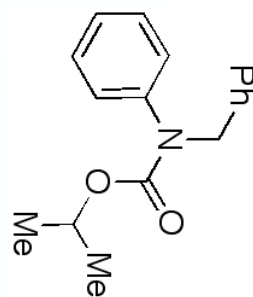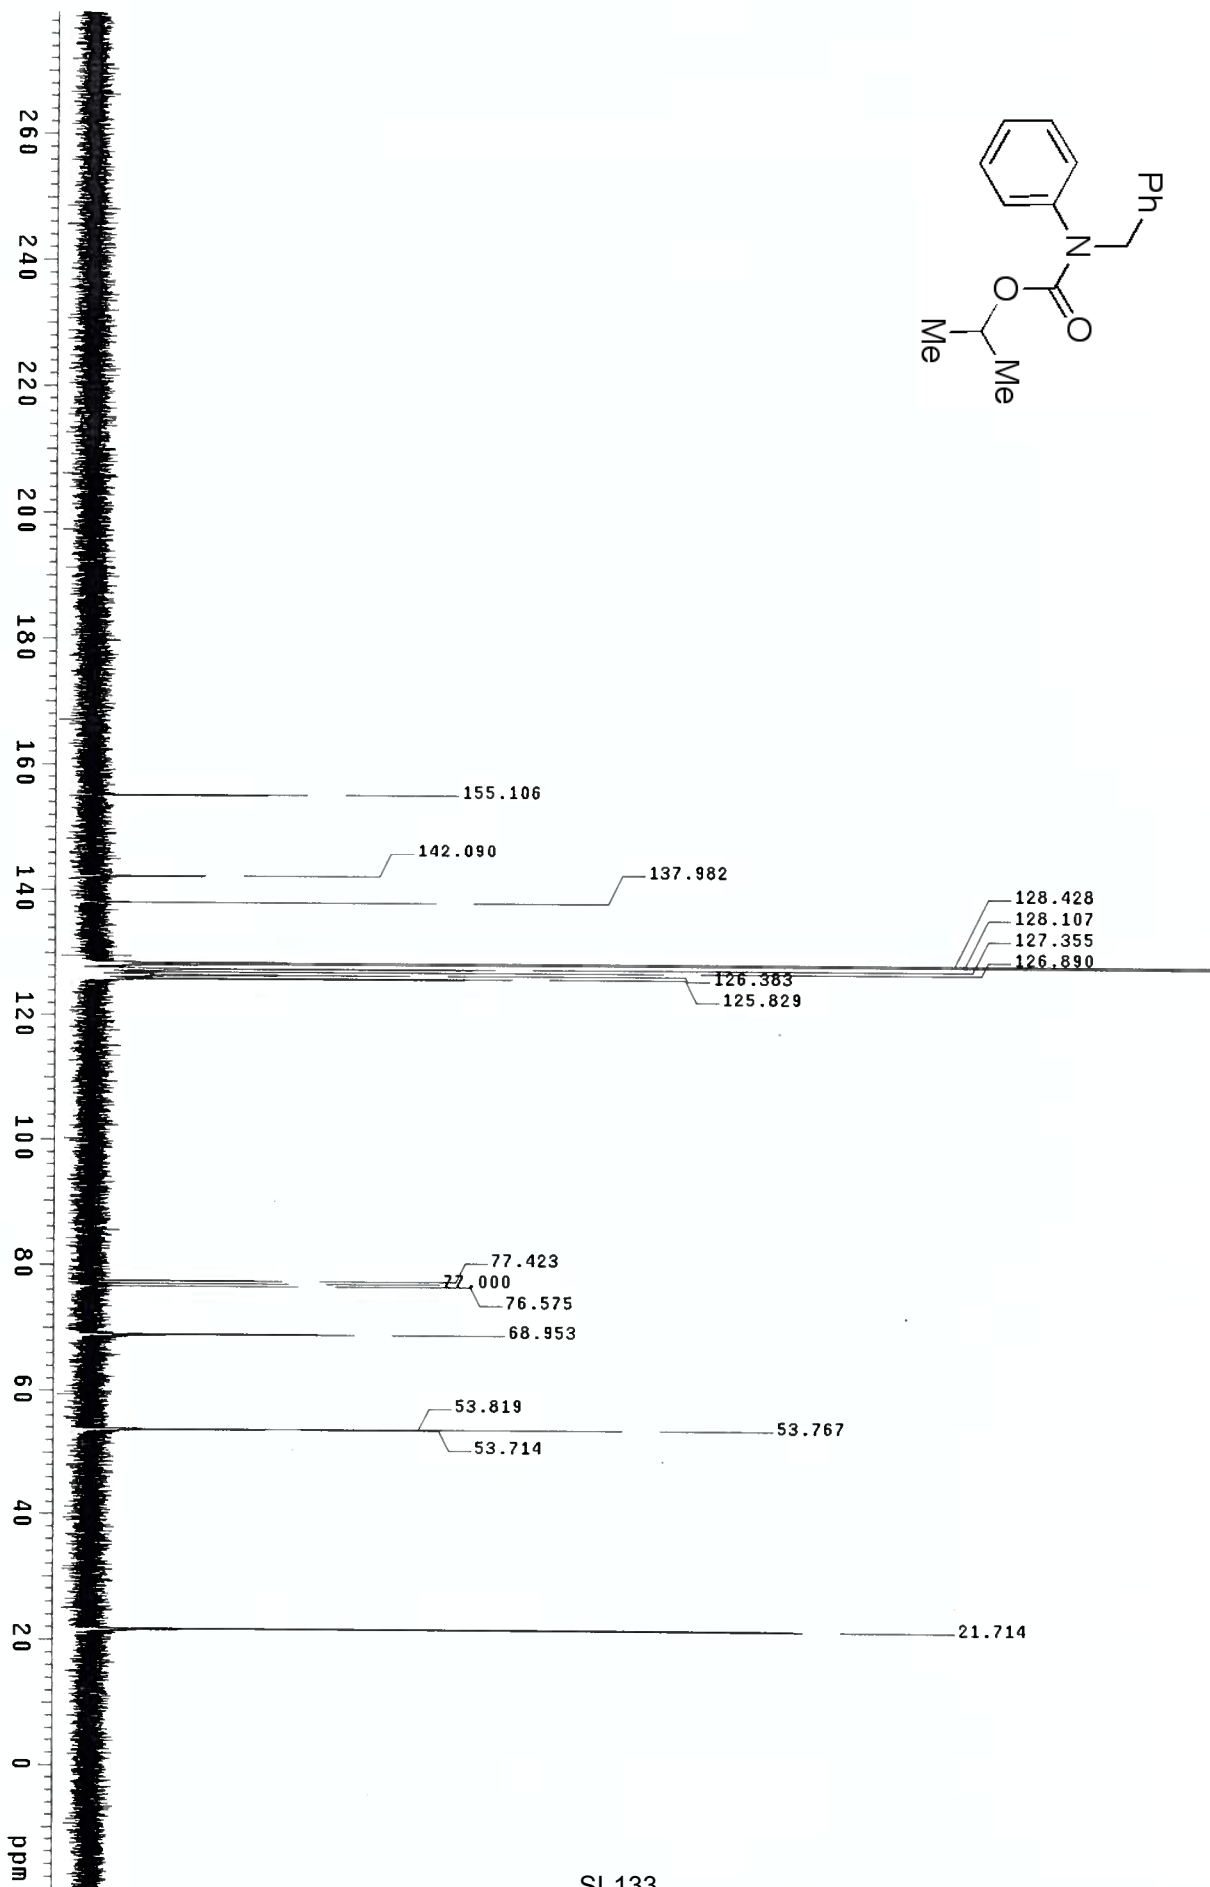

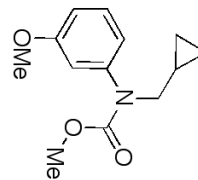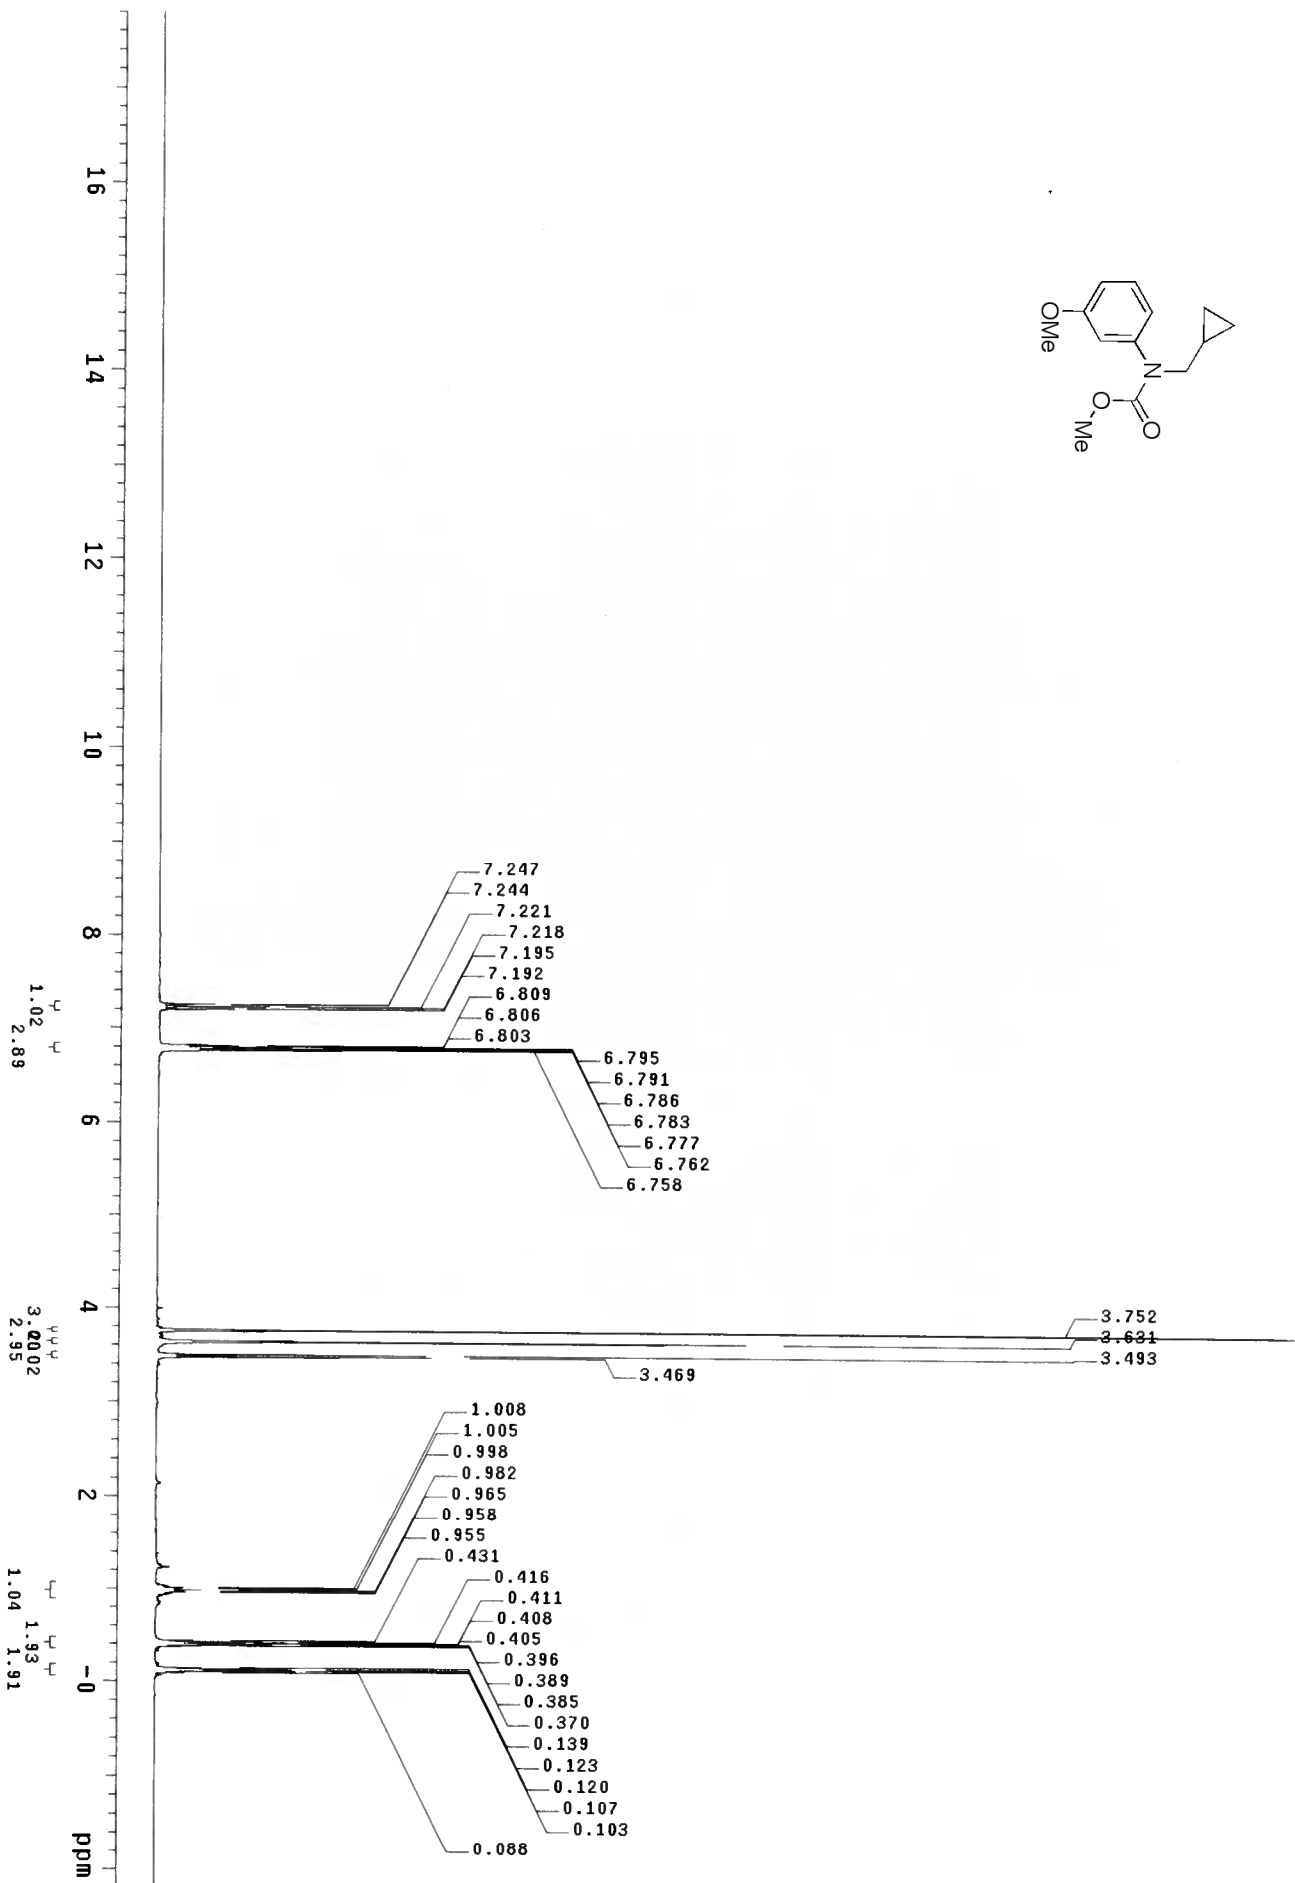

albl-50-c

expi std13c

SAMPLE DEC. & VI

date Jul 23 2008 dfrq 300.107

solvent CDCl3 dn H1

file /data/export/~ dpr 39

home/s1buch/Bacue~ dof 0

/mhat/albl-50-c.r~ dm YYY

dm W

dmf 11000

temp 20.0

PROCESSING

sfreq 75.471

tn C13

at 1.500 sb -1.500

np 67874 sbs -1.500

sw 22824.4 wtf1e ft

fb 12400 proc 262144

bs 8

tpwr 55

pw 10.0 weff

dl 0.500 wexp

tof 2264.0 wbs

nt 256 wnt

ct 224

atlock n

gain not used

flags n

i1 n

in n

dp y

DISPLAY

sp -1526.1

wp 22624.3

vs 22

sc 0

wc 250

hzmm 90.50

is 500.00

rfl 7336.8

rfp 5810.5

tn 100.000

ins

at ph

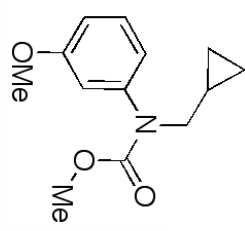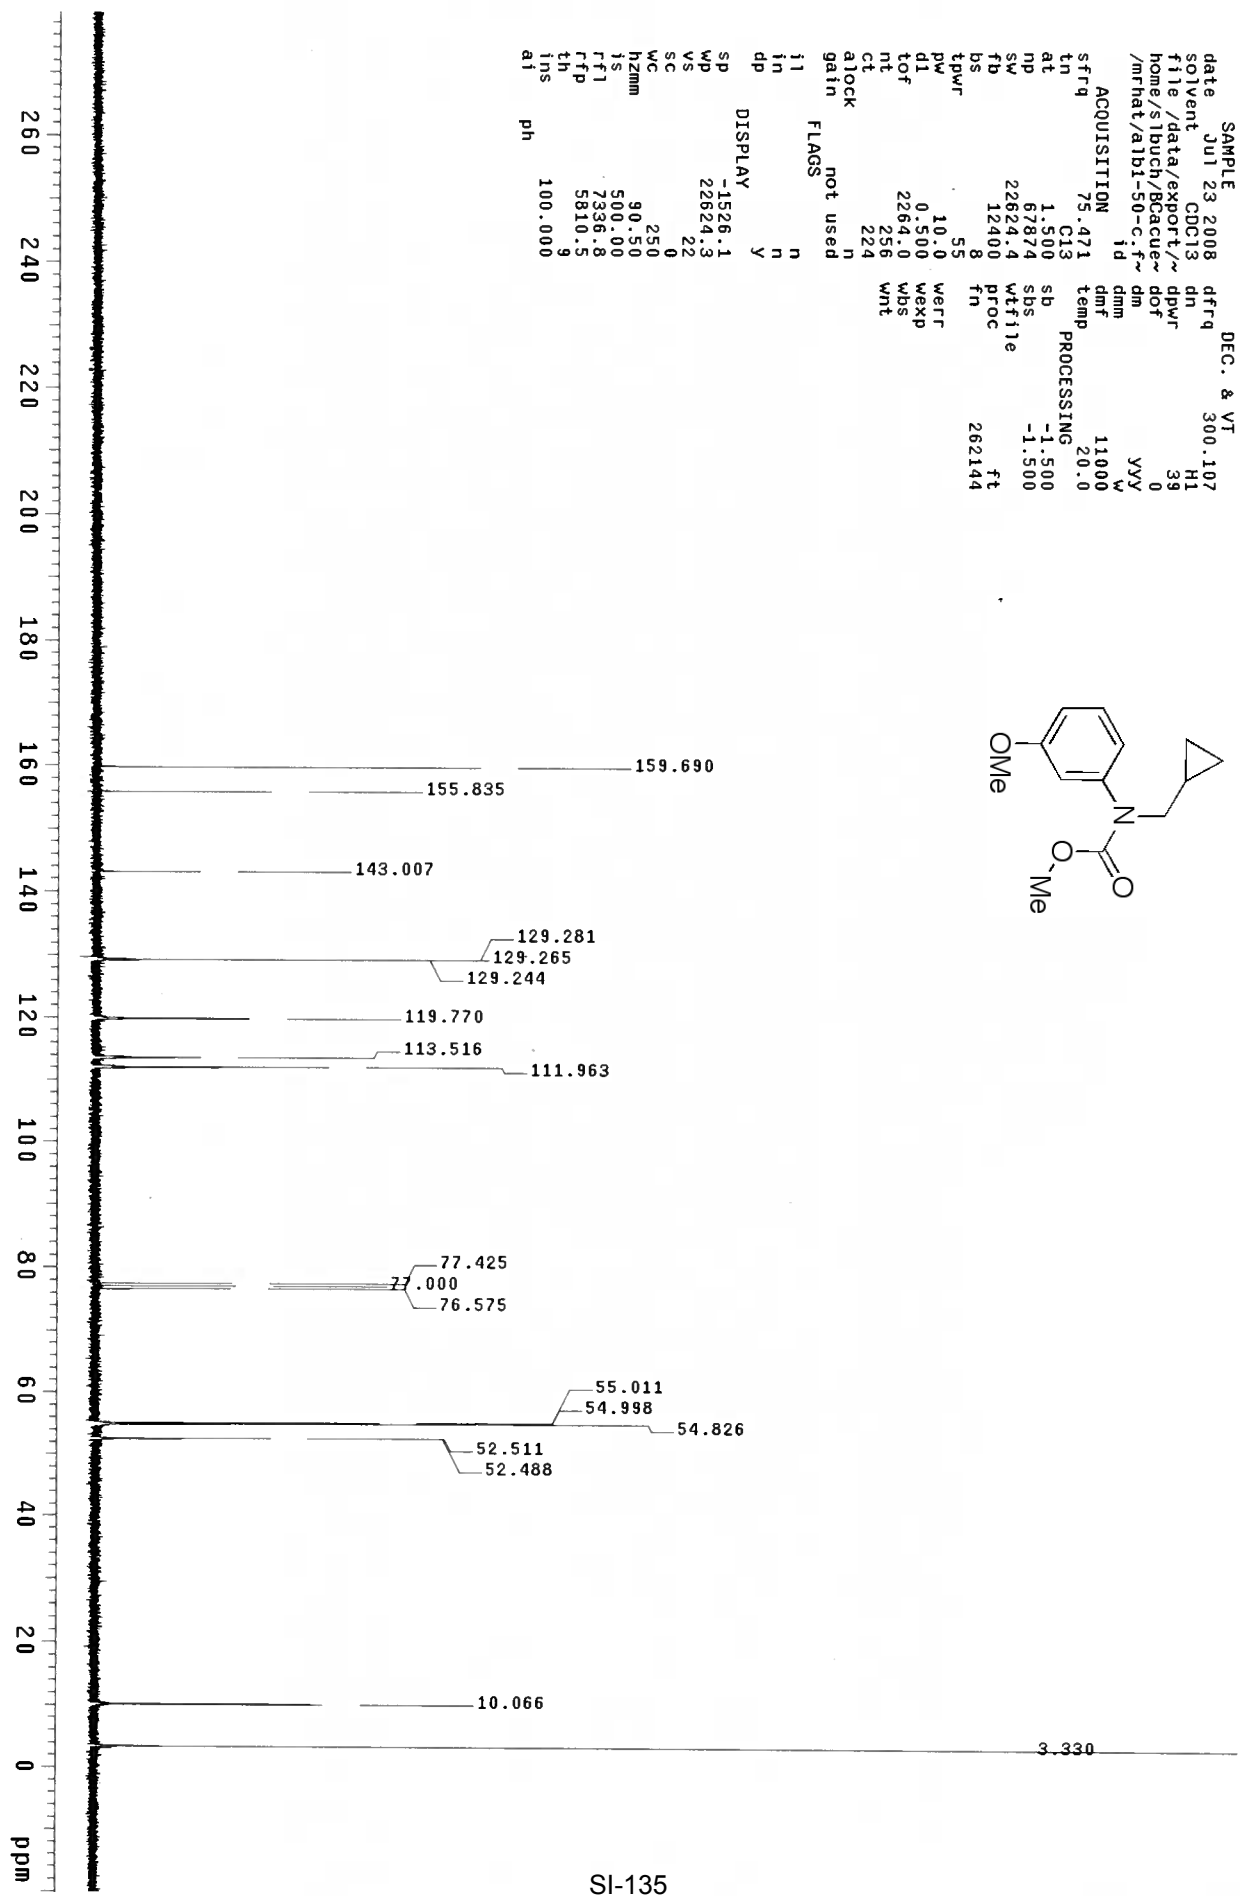

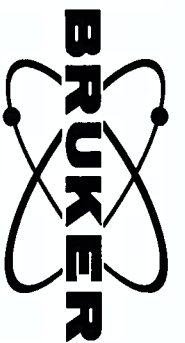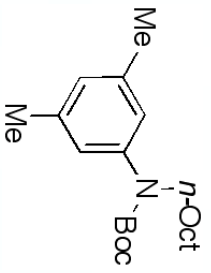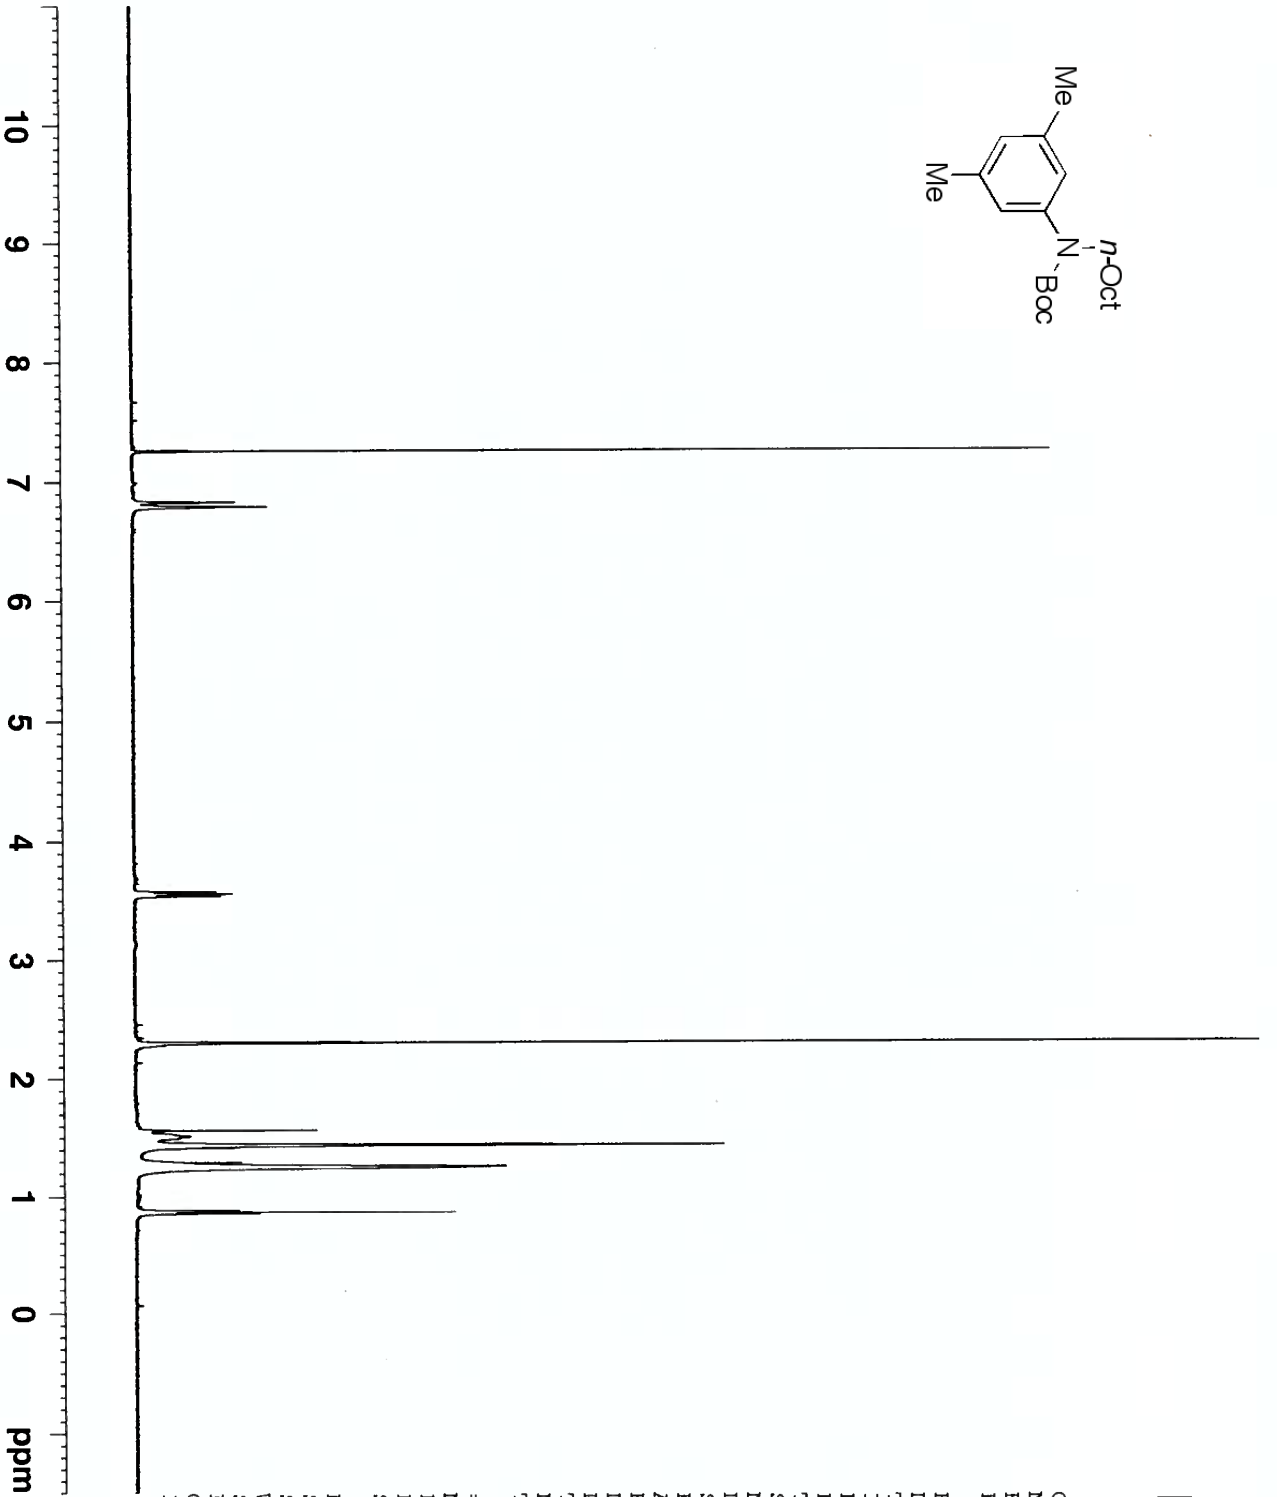

Current Data Parameters  
NAME jdh-2-221  
EXPNO 1  
PROCNO 1

F2 - Acquisition Parameters  
Date\_ 20080902  
Time 11.06  
INSTRUM spect  
PROBHD 5 mm QNP 1H/13  
PULPROG zg30  
TD 65536  
SOLVENT CDC13  
NS 16  
DS 2  
SWH 8278.146 Hz  
FIDRES 0.126314 Hz  
AQ 3.9584243 sec  
RG 406.4  
DW 60.400 usec  
DE 6.00 usec  
TE 291.2 K  
D1 1.00000000 sec  
TD0 1

SI-136

==== CHANNEL f1 =====  
NUC1 1H  
P1 13.88 usec  
PL1 0.00 dB  
SFO1 400.1324710 MHz  
F2 - Processing parameters  
SI 65536  
SF 400.1300097 MHz  
WDW no  
SSB 0  
LB 0.00 Hz  
GB 0  
PC 1.00

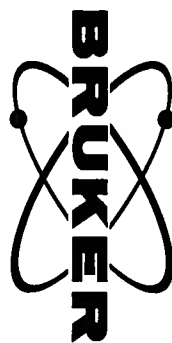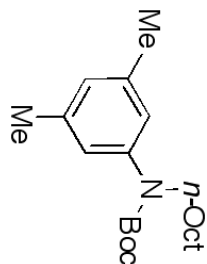

Current Data Parameters  
NAME jdh-2-267-c13  
EXPNO 1  
PROCNO 1

F2 - Acquisition Parameters

Date\_ 20080923  
Time 12.15  
INSTRUM spect  
PROBHD 5 mm QNP 1H/13  
PULPROG zgpg30  
TD 65536  
SOLVENT CDCl3  
NS 128  
DS 2  
SWH 23980.814 Hz  
FIDRES 0.365918 Hz  
AQ 1.3664756 sec  
RG 2896.3  
DW 20.850 usec  
DE 6.00 usec  
TE 292.2 K  
D1 2.00000000 sec  
d11 0.03000000 sec  
DELTA 1.89999998 sec  
TD0 1

==== CHANNEL f1 =====  
NUC1 13C  
P1 9.38 usec  
PL1 0.00 dB  
SFO1 100.6228298 MHz

==== CHANNEL f2 =====  
CPDPRG2 waltz16  
NUC2 1H  
PCPD2 90.00 usec  
PL2 0.00 dB  
PL12 16.10 dB  
PL13 19.00 dB  
SFO2 400.1316005 MHz

F2 - Processing parameters  
SI 65536  
SF 100.6127751 MHz  
WDW no  
SSB 0  
LB 0.00 Hz  
GB 0  
PC 1.40

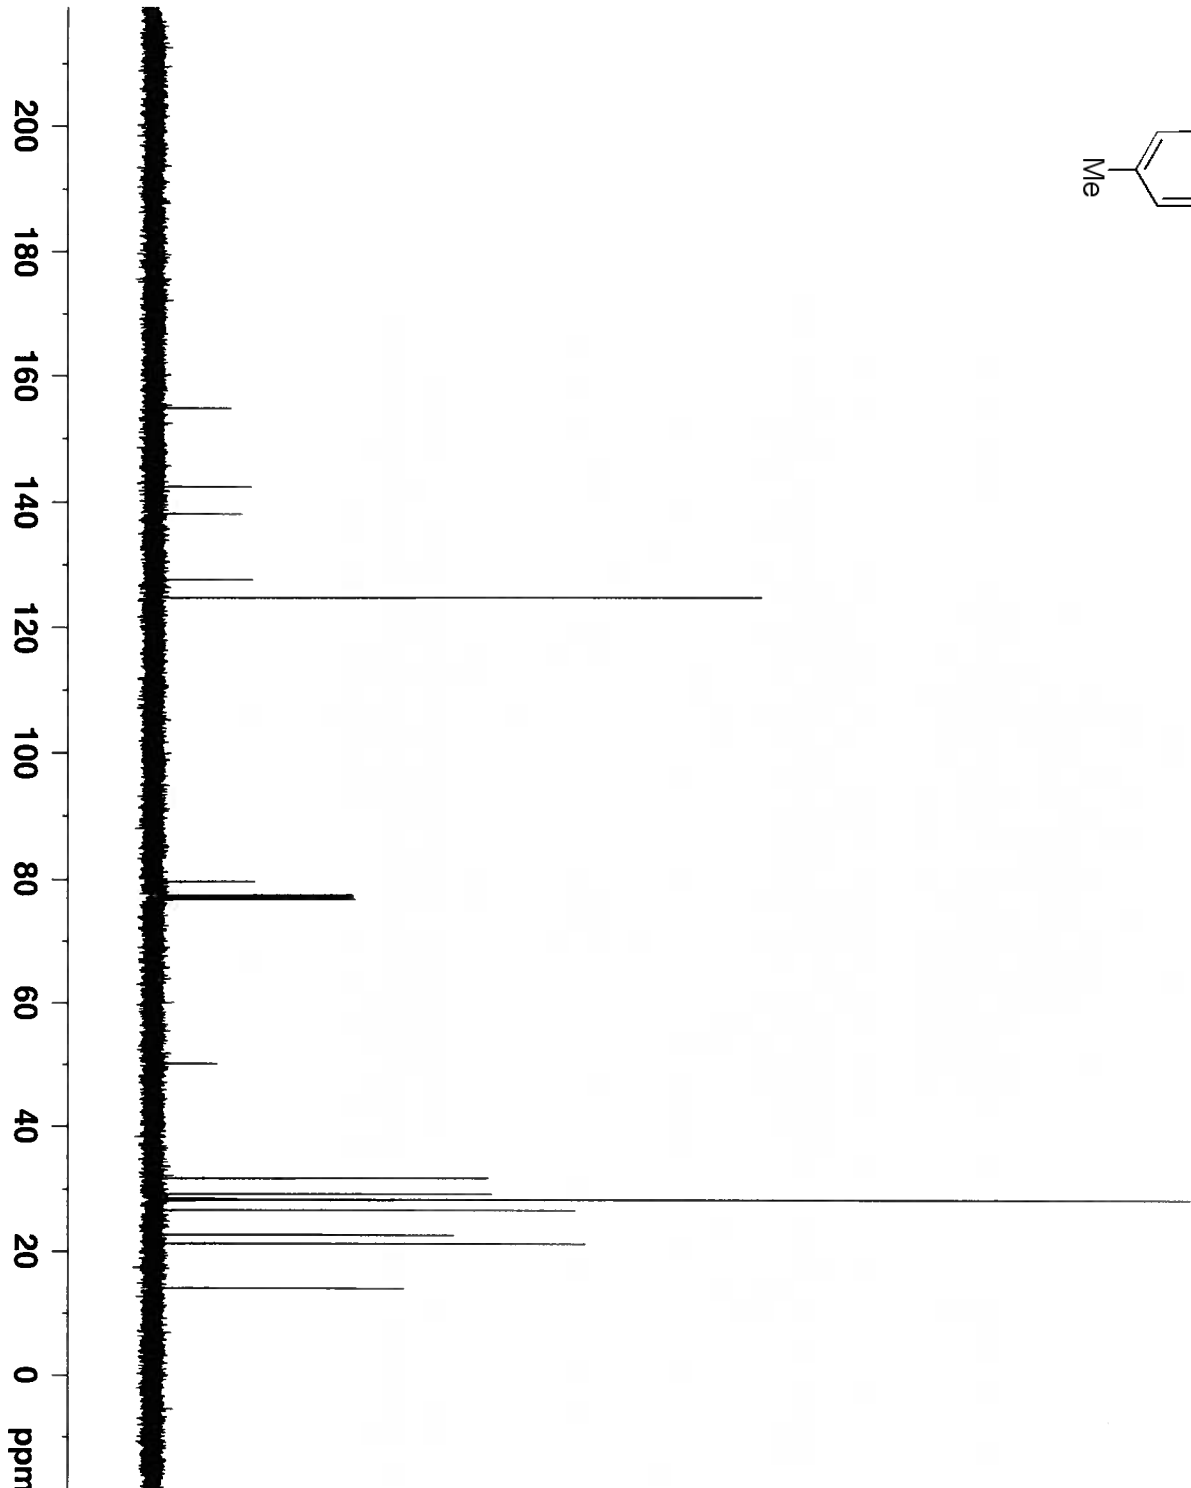

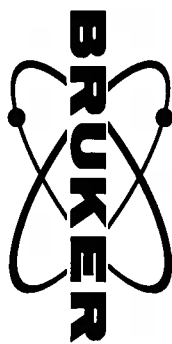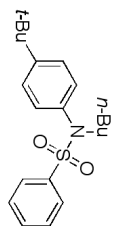

Current Data Parameters  
 NAME jdh-2-238  
 EXPNO 1  
 PROCNO 1

F2 - Acquisition Parameters  
 Date\_ 20080908  
 Time 20.19  
 INSTRUM spect  
 PROBHD 5 mm QNP 1H/13  
 PULPROG zg30  
 TD 65536  
 SOLVENT CDCl3  
 NS 16  
 DS 2  
 SMH 8278.146 Hz  
 FIDRES 0.126314 Hz  
 AQ 3.9584243 sec  
 RG 256  
 DW 60.400 usec  
 DE 6.00 usec  
 TE 291.2 K  
 D1 1.00000000 sec  
 TD0 1

88-138 S

==== CHANNEL f1 =====  
 NUC1 1H  
 P1 13.88 usec  
 Pl1 0.00 dB  
 SF01 400.1324710 MHz  
 F2 - Processing parameters  
 SI 65536  
 SF 400.1300094 MHz  
 WDW no  
 SSB 0  
 LB 0.00 Hz  
 GB 0  
 PC 1.00

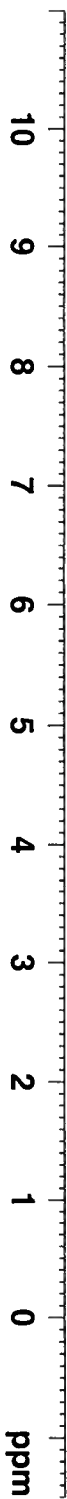

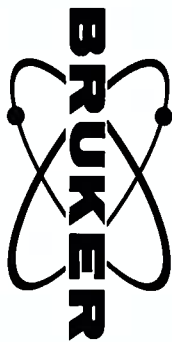

Current Data Parameters  
NAME jdh-2-238-C13  
EXPNO 1  
PROCNO 1

F2 - Acquisition Parameters  
Date\_ 20080908  
Time 20.37  
INSTRUM spect  
PROBHD 5 mm QNP 1H/13  
PULPROG zgpg30  
TD 65536  
SOLVENT CDC13  
NS 256  
DS 4  
SWH 23980.814 Hz  
FIDRES 0.365918 Hz  
AQ 1.3664756 sec  
RG 2580.3  
DW 20.850 usec  
DE 6.00 usec  
TE 293.2 K  
D1 2.00000000 sec  
d11 0.03000000 sec  
DELTA 1.89999998 sec  
TD0 1

==== CHANNEL f1 =====  
NUC1 13C  
P1 9.38 usec  
PL1 0.00 dB  
SF01 100.6228298 MHz  
  
==== CHANNEL f2 =====  
CPDPRG2 waltz16  
NUC2 1H  
PCPD2 90.00 usec  
PL2 0.00 dB  
PL12 16.10 dB  
PL13 19.00 dB  
SF02 400.1316005 MHz

F2 - Processing parameters  
SI 32768  
SF 100.6127760 MHz  
WDW no  
SSB 0  
LB 0.00 Hz  
GB 0  
PC 1.40

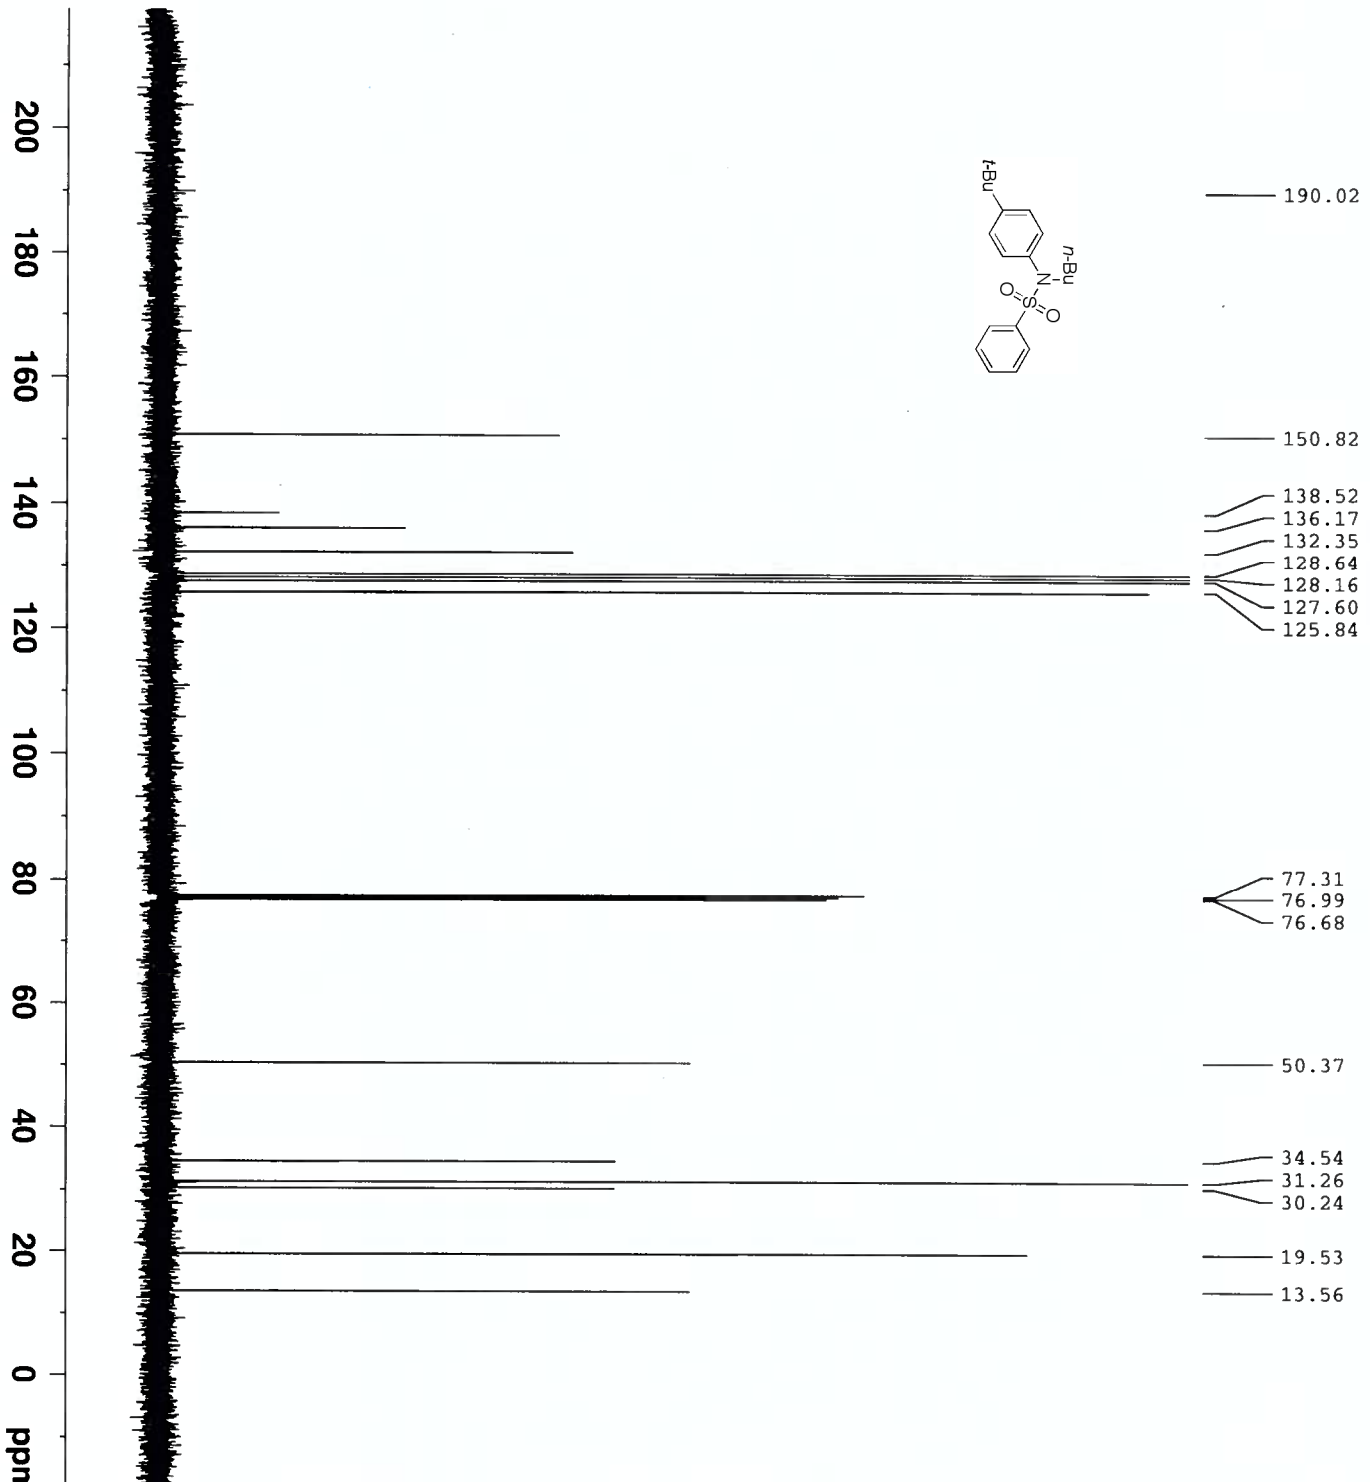

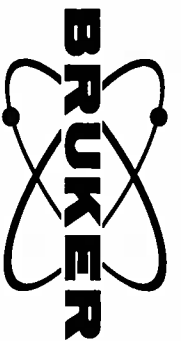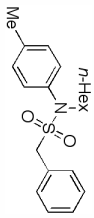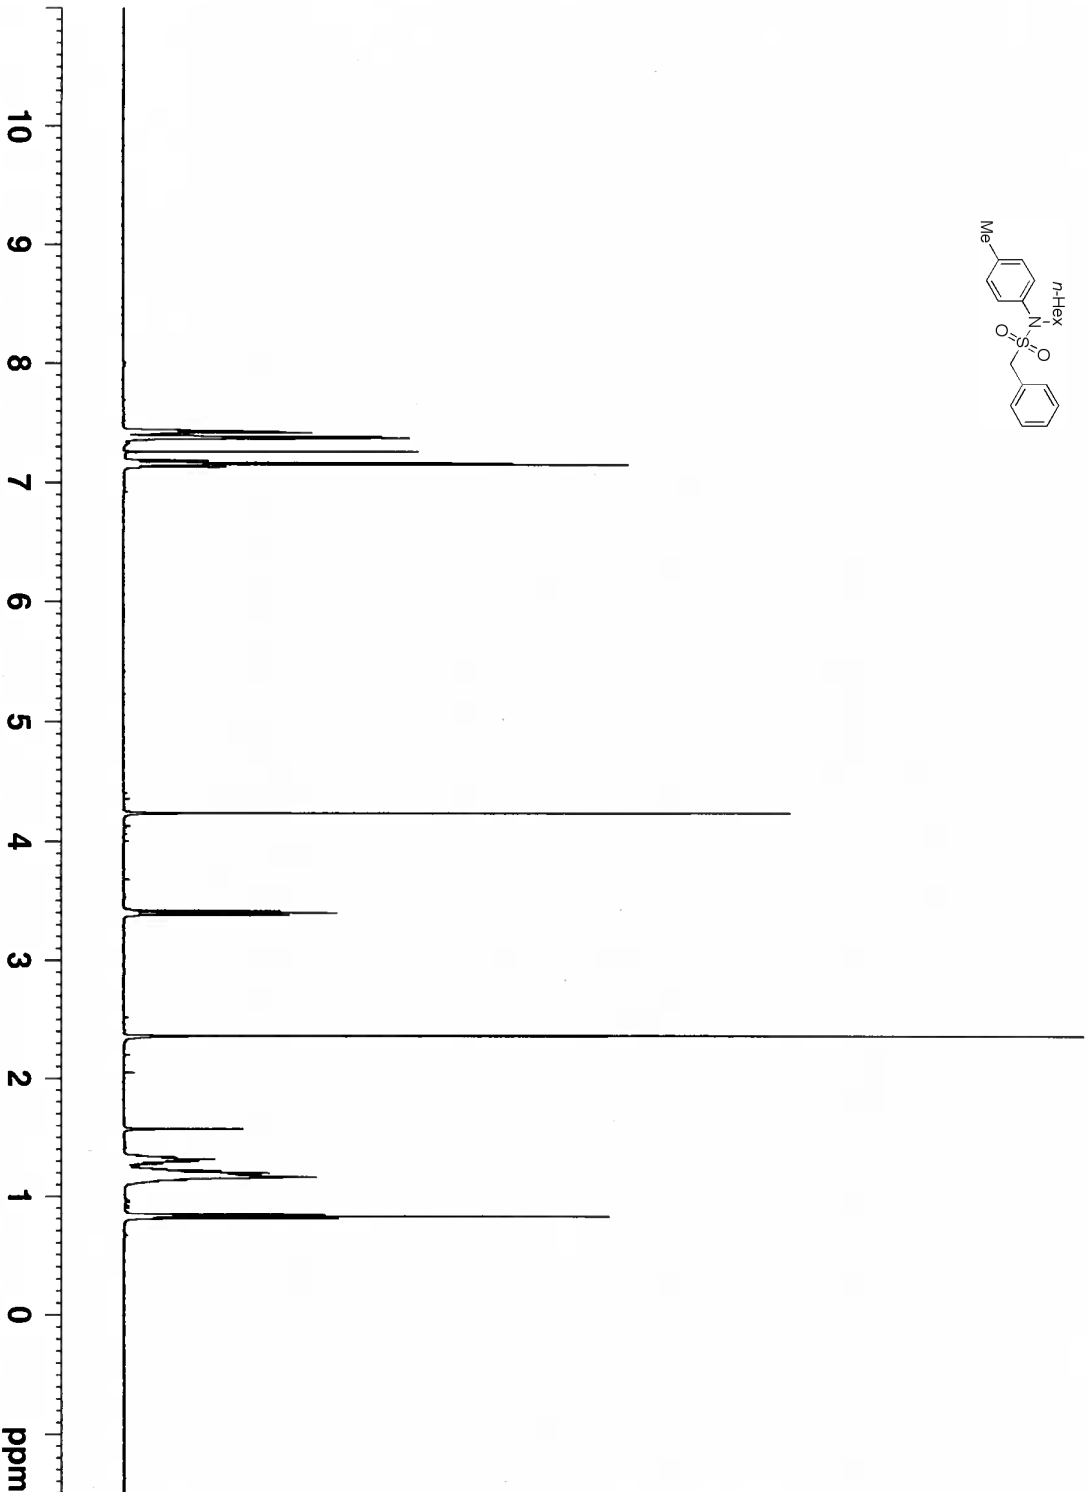

Current Data Parameters  
NAME jdh-2-240  
EXPNO 1  
PROCNO 1

F2 - Acquisition Parameters  
Date\_ 20080909  
Time 12.11  
INSTRUM spect  
PROBHD 5 mm QNP 1H/13  
PULPROG zg30  
TD 65536  
SOLVENT CDC13  
NS 16  
DS 2  
SWH 8278.146 Hz  
FIDRES 0.126314 Hz  
AQ 3.9584243 sec  
RG 287.4  
DW 60.400 usec  
DE 6.00 usec  
TE 291.2 K  
D1 1.00000000 sec  
TD0 1

==== CHANNEL f1 =====  
NUC1 1H  
P1 13.88 usec  
PL1 0.00 dB  
SFO1 400.1324710 MHz  
F2 - Processing parameters  
SI 65536  
SF 400.1300097 MHz  
WDW no  
SSB 0  
LB 0.00 Hz  
GB 0  
PC 1.00



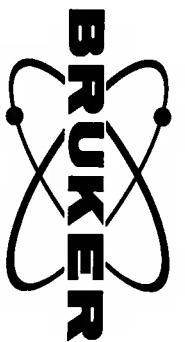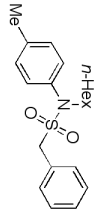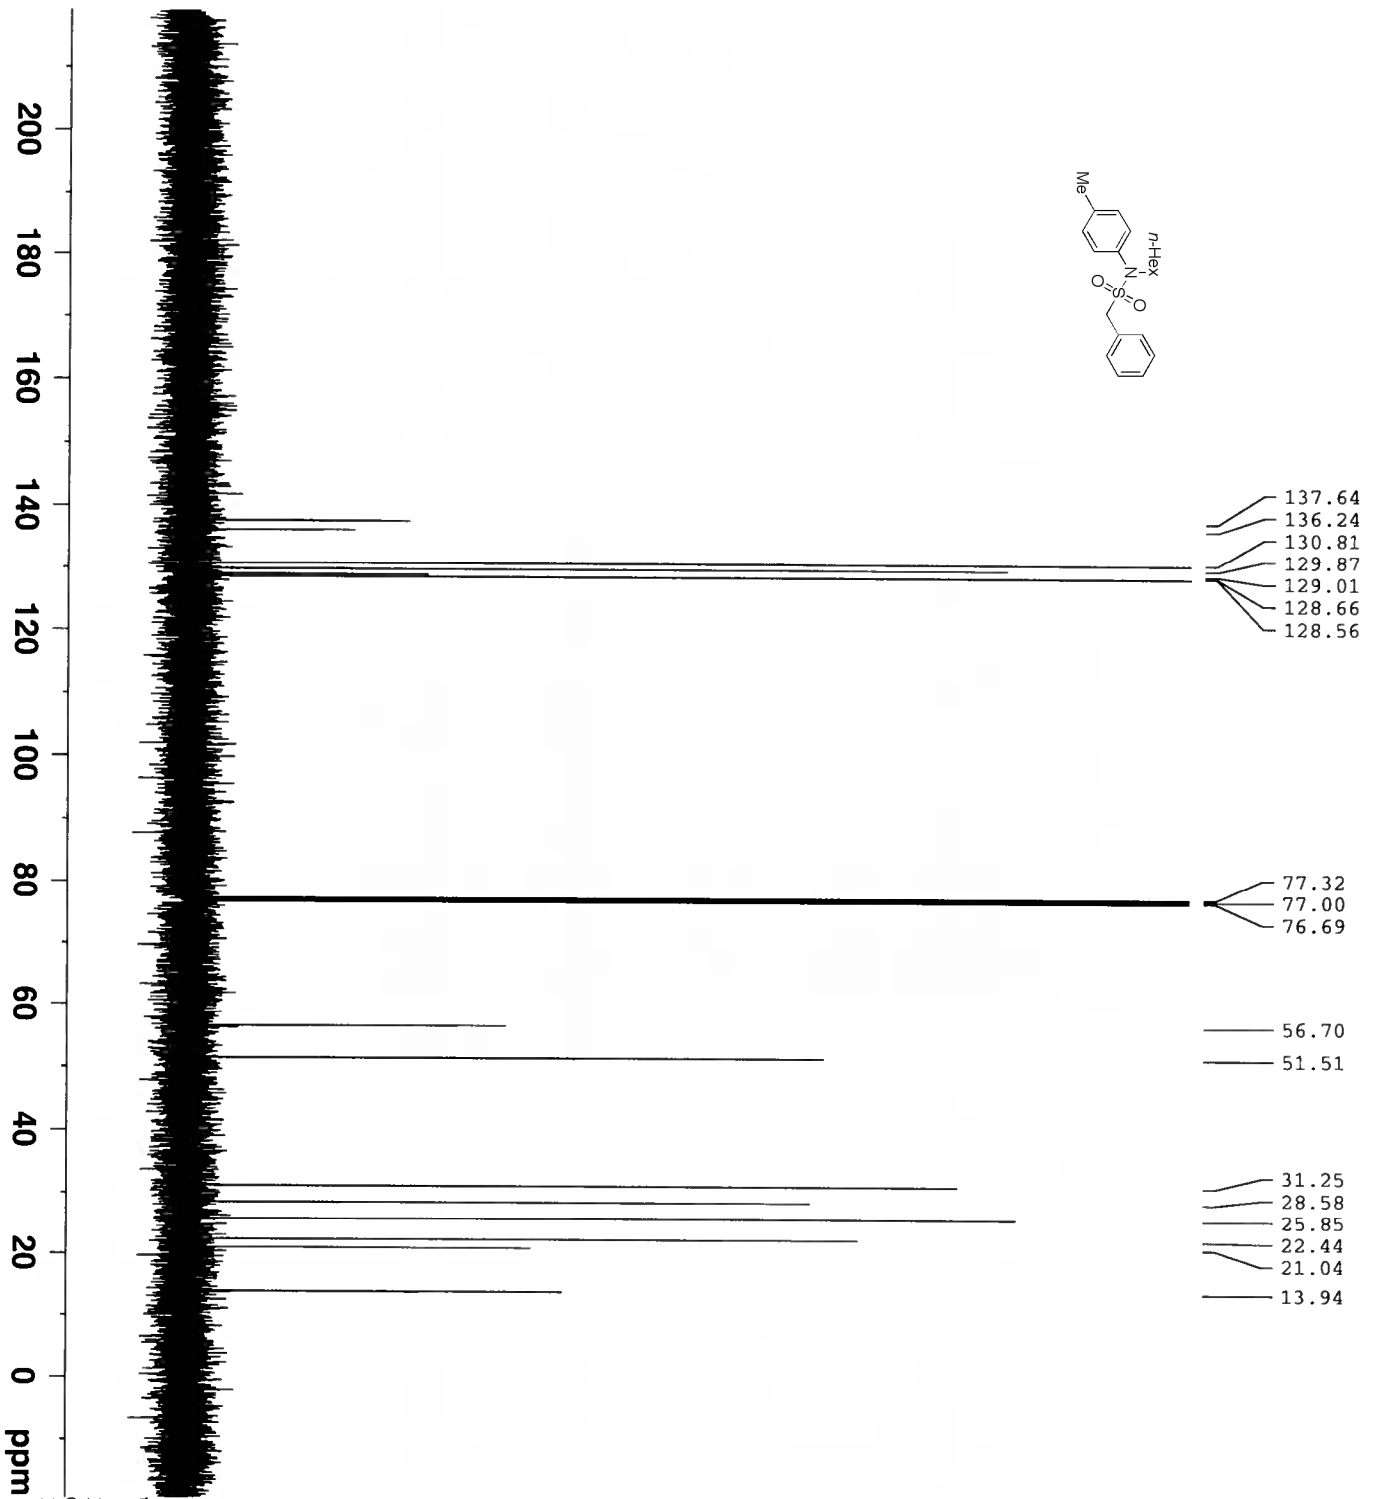

Current Data Parameters  
 NAME jdh-2-240-c13  
 EXPRNO 1  
 PROCNO 1

F2 - Acquisition Parameters  
 Date\_ 20080909  
 Time 12.21  
 INSTRUM spect  
 PROBHD 5 mm QNP 1H/13  
 PULPROG zgpg30  
 TD 65536  
 SOLVENT CDCl3  
 NS 128  
 DS 4  
 SWH 23980.814 Hz  
 FIDRES 0.365918 Hz  
 AQ 1.3664756 sec  
 RG 1625.5  
 DW 20.850 usec  
 DE 6.00 usec  
 TE 292.2 K  
 D1 2.00000000 sec  
 d11 0.03000000 sec  
 DELTA 1.89999998 sec  
 TD0 1

==== CHANNEL f1 =====  
 NUC1 13C  
 P1 9.38 usec  
 PL1 0.00 dB  
 SFO1 100.6228298 MHz

==== CHANNEL f2 =====  
 CPDPRG2 waltz16  
 NUC2 1H  
 PCPD2 90.00 usec  
 PL2 0.00 dB  
 PL12 16.10 dB  
 PL13 19.00 dB  
 SFO2 400.1316005 MHz

F2 - Processing parameters  
 SI 32768  
 SF 100.6127756 MHz  
 WDW no  
 SSB 0  
 LB 0.00 Hz  
 GB 0  
 PC 1.40

albi-108-h

expi stdin

SAMPLE DEC. & VT  
 date Aug 28 2008 dfrq 300.107  
 solvent CDCl3 dh H1  
 file /data/export/~ home/stibuch/BCacue~ dof 30  
 /mrhat/albi-108-h-~ dm 0  
 /mrhat/albi-108-h-~ dnm nnn  
 fid dm C

ACQUISITION  
 sfrq 300.108 dnr 200  
 in H1 temp 20.0  
 at 4.003 wf file ft  
 np 48052 proc 131072  
 sw 6002.4 fn  
 fb not used  
 bs not used  
 tpwr 16 wert  
 pw 3.0 wexp  
 di 0.050 wbs  
 tof 867.7 wnt

ct 8  
 nt 8  
 alock not used  
 gain n  
 fl n  
 in n  
 dp y  
 DISPLAY  
 sp -660.9  
 wp 6002.3  
 vs 151  
 sc 0  
 WC 250  
 hzmm 24.01  
 is 500.00  
 rfp 661.0  
 th 0  
 ins 5  
 nm 3.000  
 ph

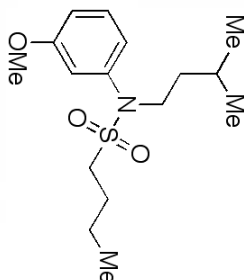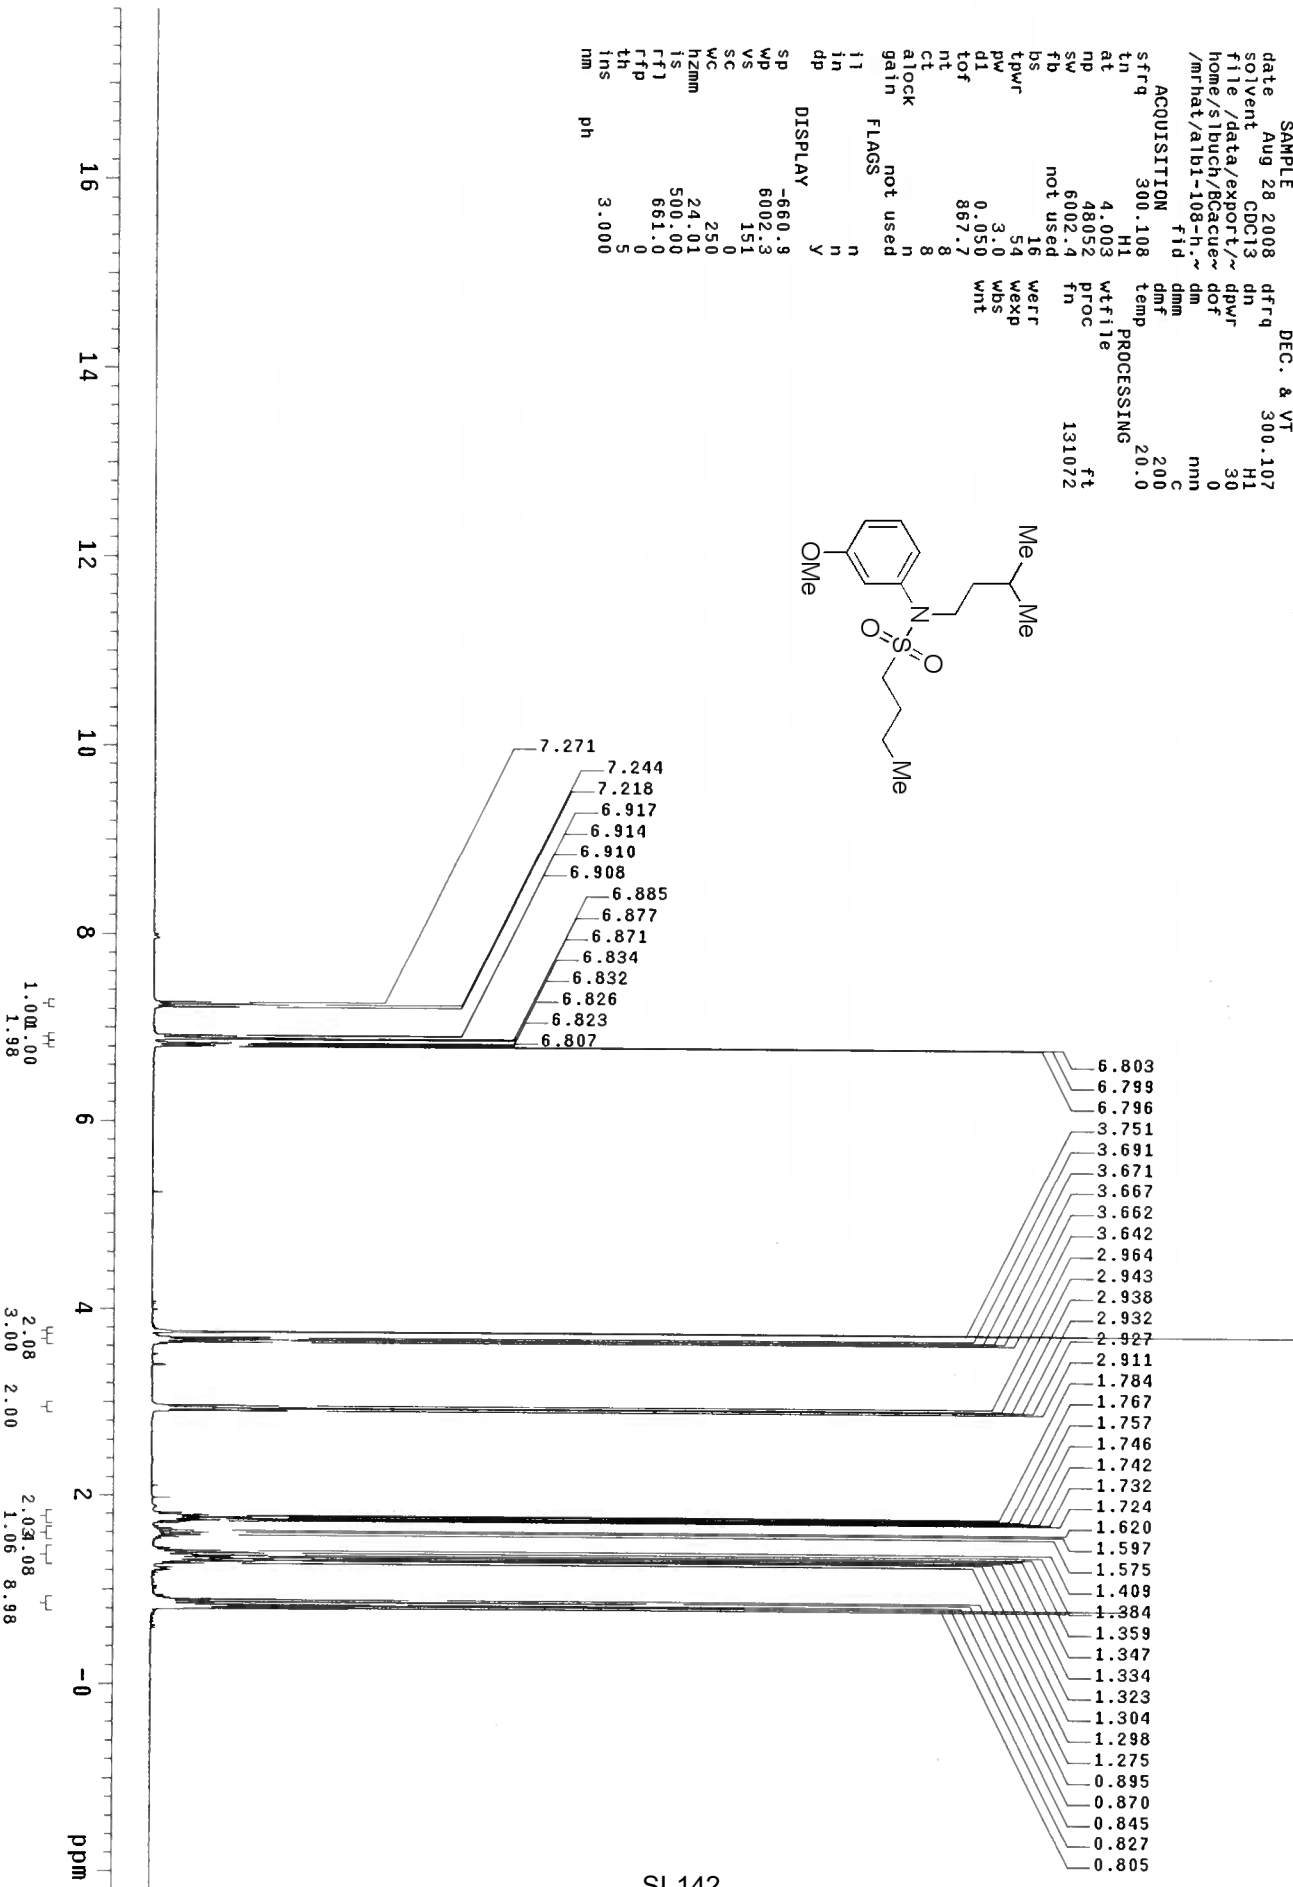

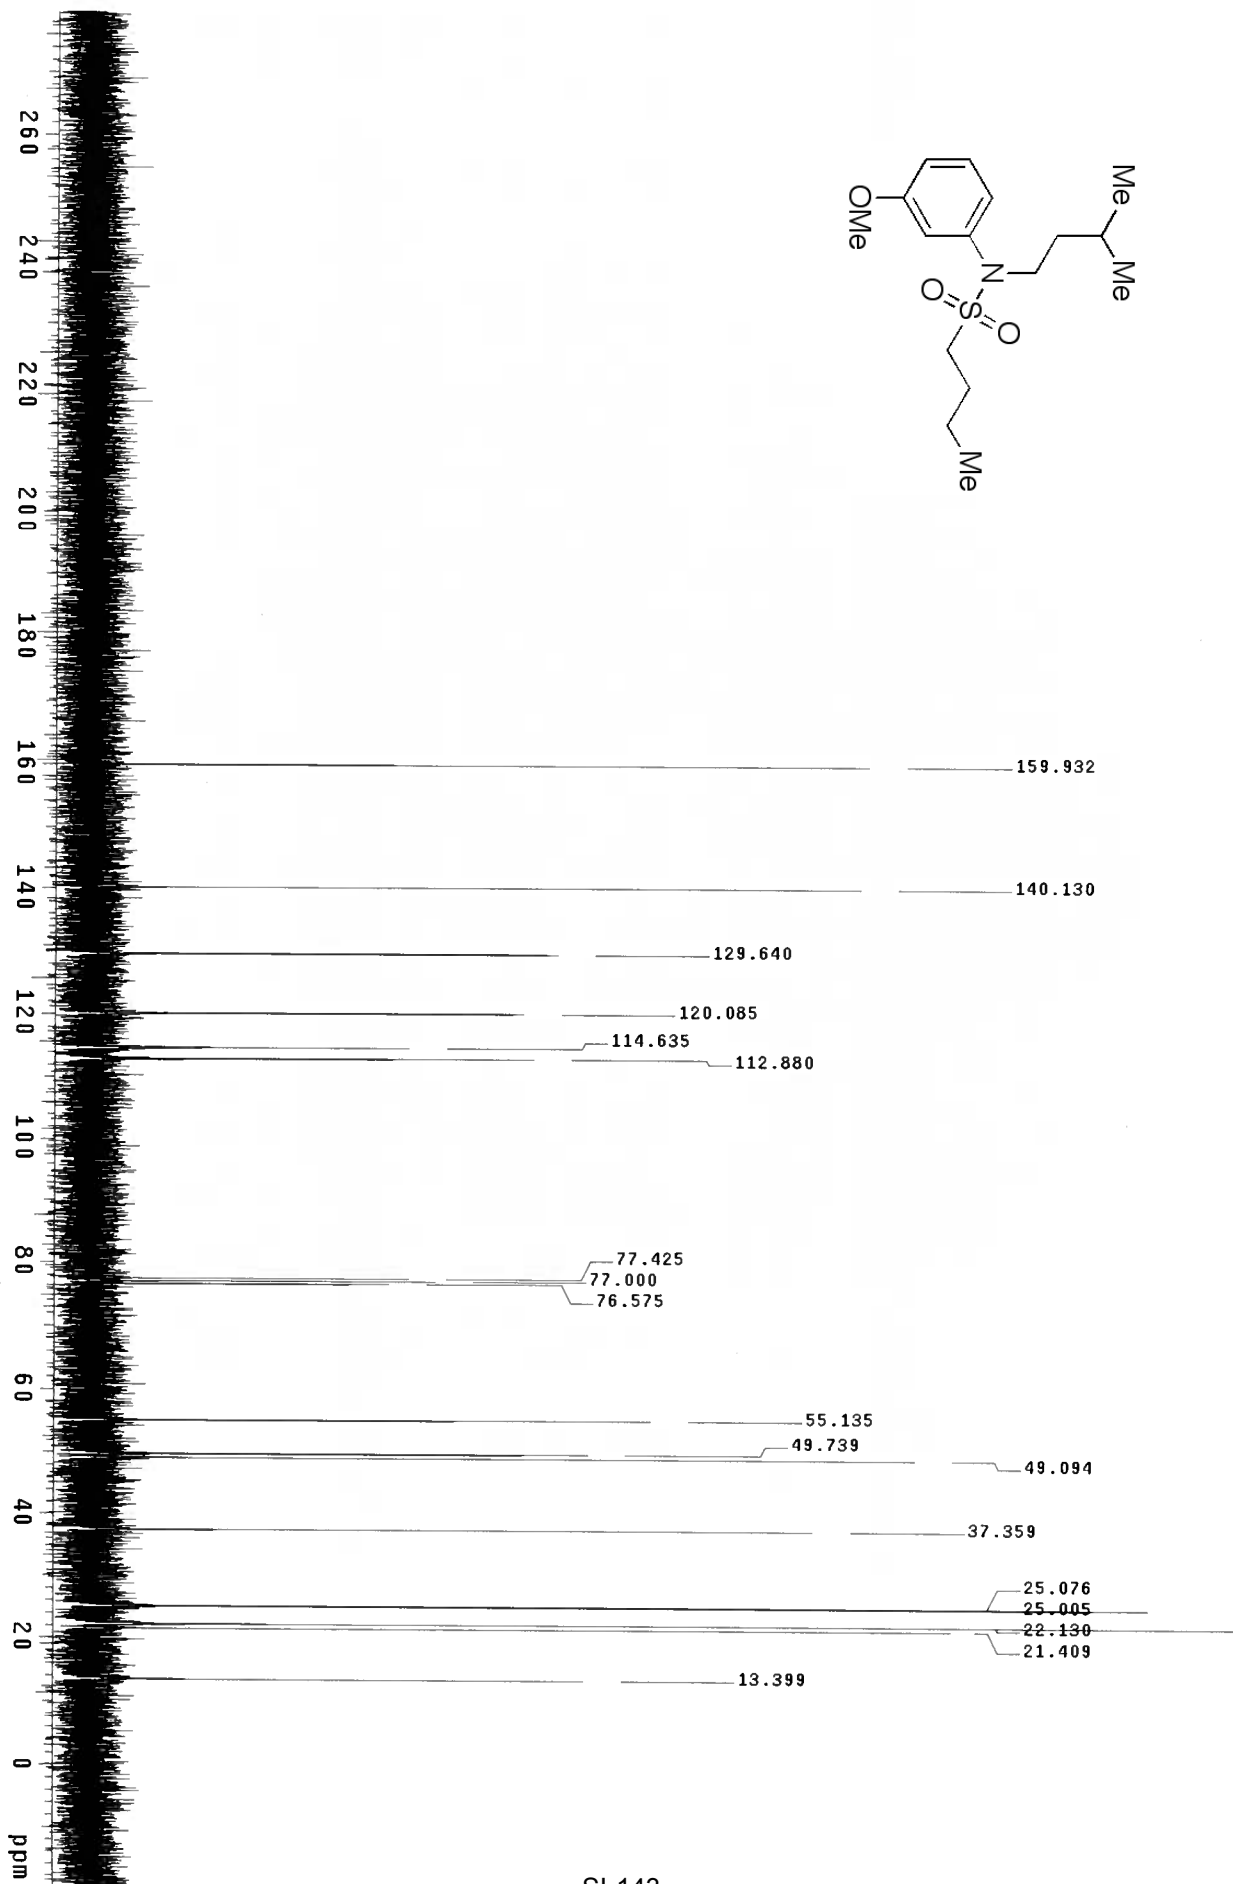

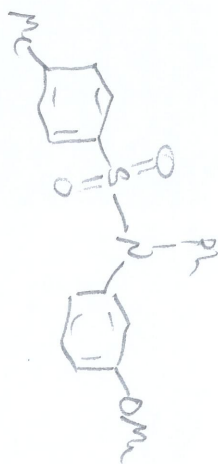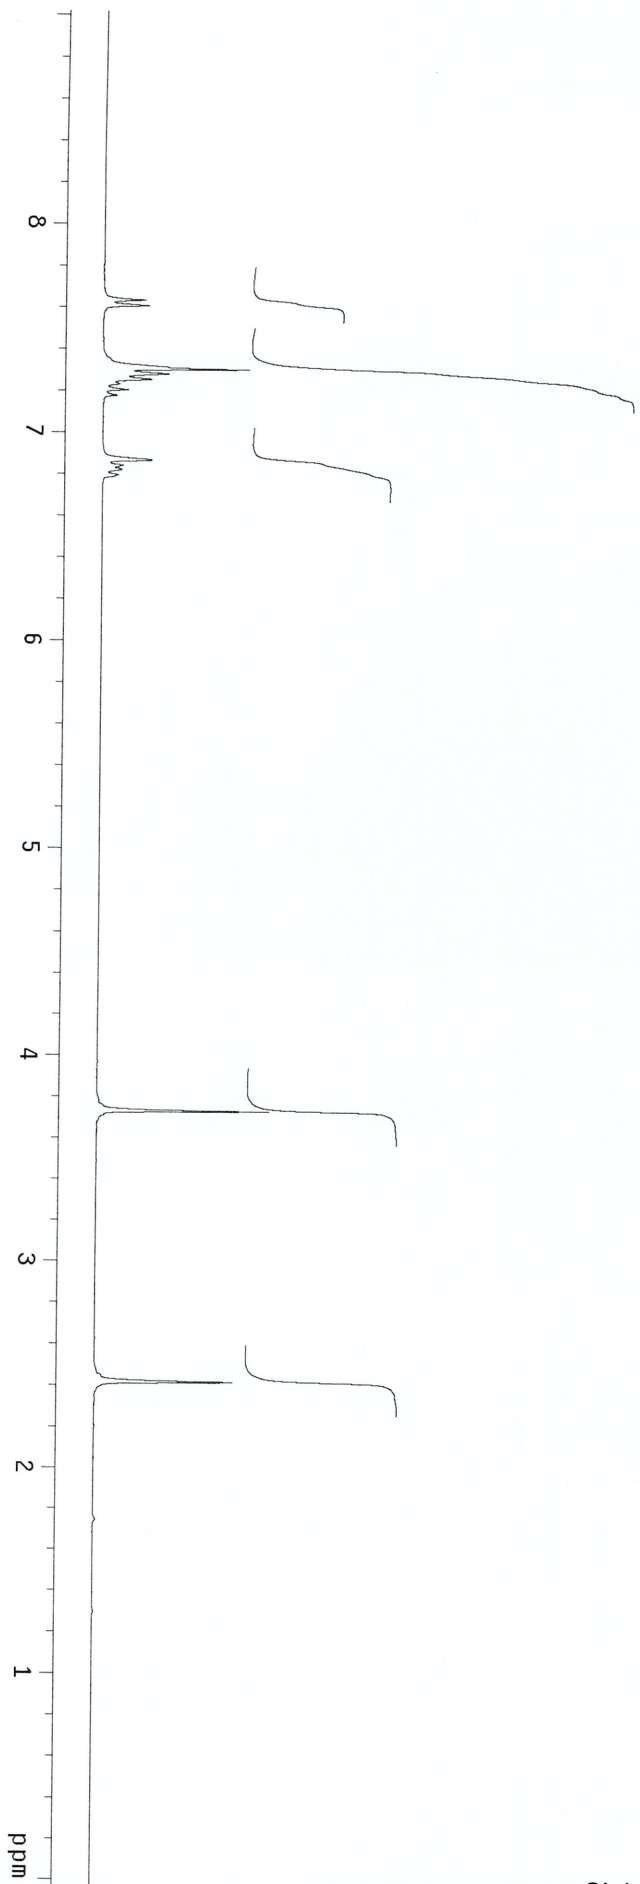

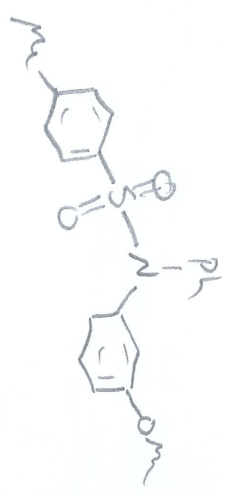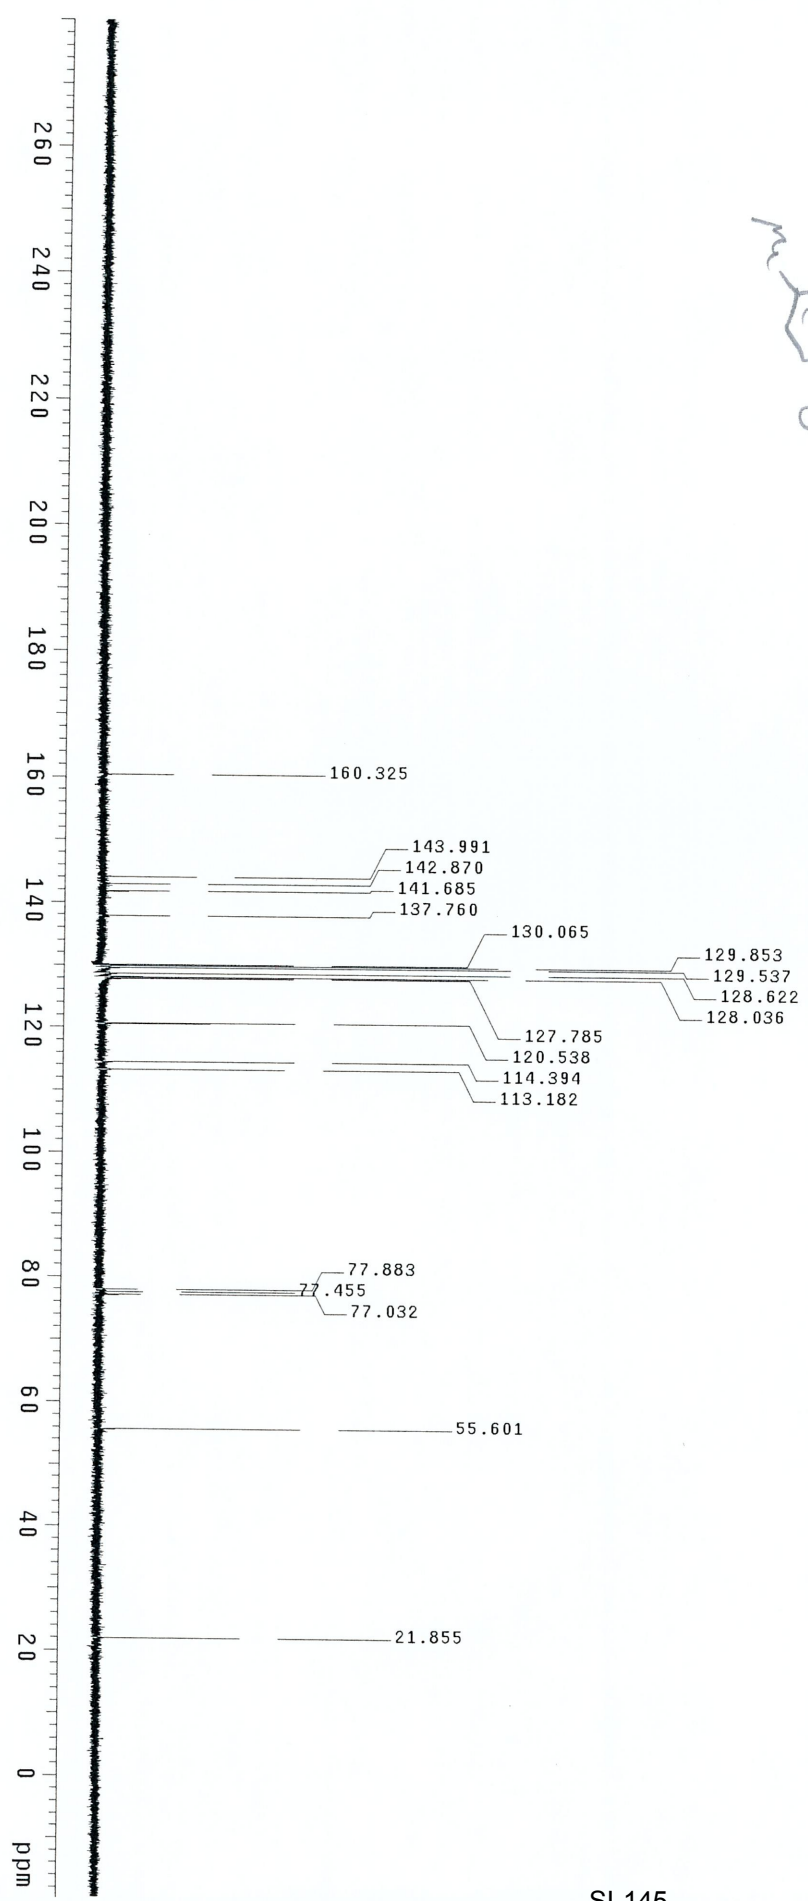

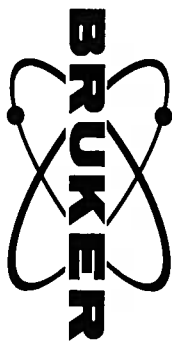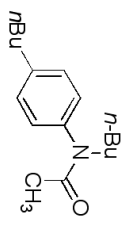

Current Data Parameters  
 NAME jdh-2-264  
 EXPNO 1  
 PROCNO 1

F2 - Acquisition Parameters  
 Date\_ 20080922  
 Time 12.29  
 INSTRUM spect  
 PROBHD 5 mm QNP 1H/13  
 PULPROG zg30  
 TD 65536  
 SOLVENT CDCl3  
 NS 16  
 DS 2  
 SWH 8278.146 Hz  
 FIDRES 0.126314 Hz  
 AQ 3.9584243 sec  
 RG 287.4  
 DW 60.400 usec  
 DE 6.00 usec  
 TE 291.2 K  
 D1 1.00000000 sec  
 TD0 1

==== CHANNEL f1 =====  
 NUC1 1H  
 P1 13.88 usec  
 PL1 0.00 dB  
 SF01 400.1324710 MHz

F2 - Processing parameters  
 SI 65536  
 SF 400.1300098 MHz  
 WDW no  
 SSB 0  
 LB 0.00 Hz  
 GB 0  
 PC 1.00

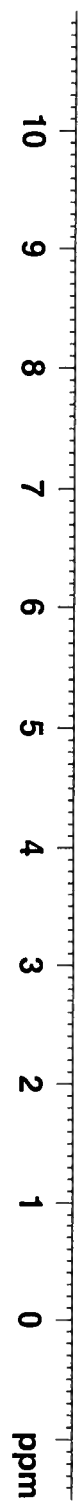

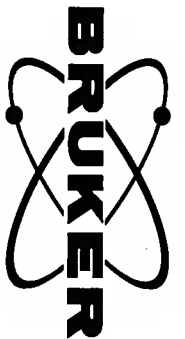

Current Data Parameters  
 NAME jdh-2-264-cl3  
 EXENO 1  
 PROCNO 1

F2 - Acquisition Parameters  
 Date\_ 20080922  
 Time 12.40

INSTRUM spect  
 PROBHID 5 mm QNP 1H/13  
 PULPROG zgpg30

TD 65536  
 SOLVENT CDCl3

NS 129  
 DS 2

SWH 23980.814 Hz  
 FIDRES 0.365918 Hz

AQ 1.3664756 sec  
 RG 1149.4

DW 20.850 usec  
 DE 6.00 usec

TE 292.2 K  
 D1 2.00000000 sec

d11 0.03000000 sec  
 DELTA 1.89999998 sec

TD0 1

===== CHANNEL f1 =====  
 NUC1 13C

P1 9.38 usec  
 PL1 0.00 dB

SFO1 100.6228298 MHz

===== CHANNEL f2 =====  
 CPDPRG2 waltz16

NUC2 1H  
 PCPD2 90.00 usec

PL2 0.00 dB  
 PL12 16.10 dB

PL13 19.00 dB  
 SFO2 400.1316005 MHz

F2 - Processing parameters

SI 65536  
 SF 100.6127798 MHz

WDW no  
 SSB 0

LB 0.00 Hz  
 GB 0

PC 1.40

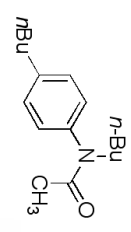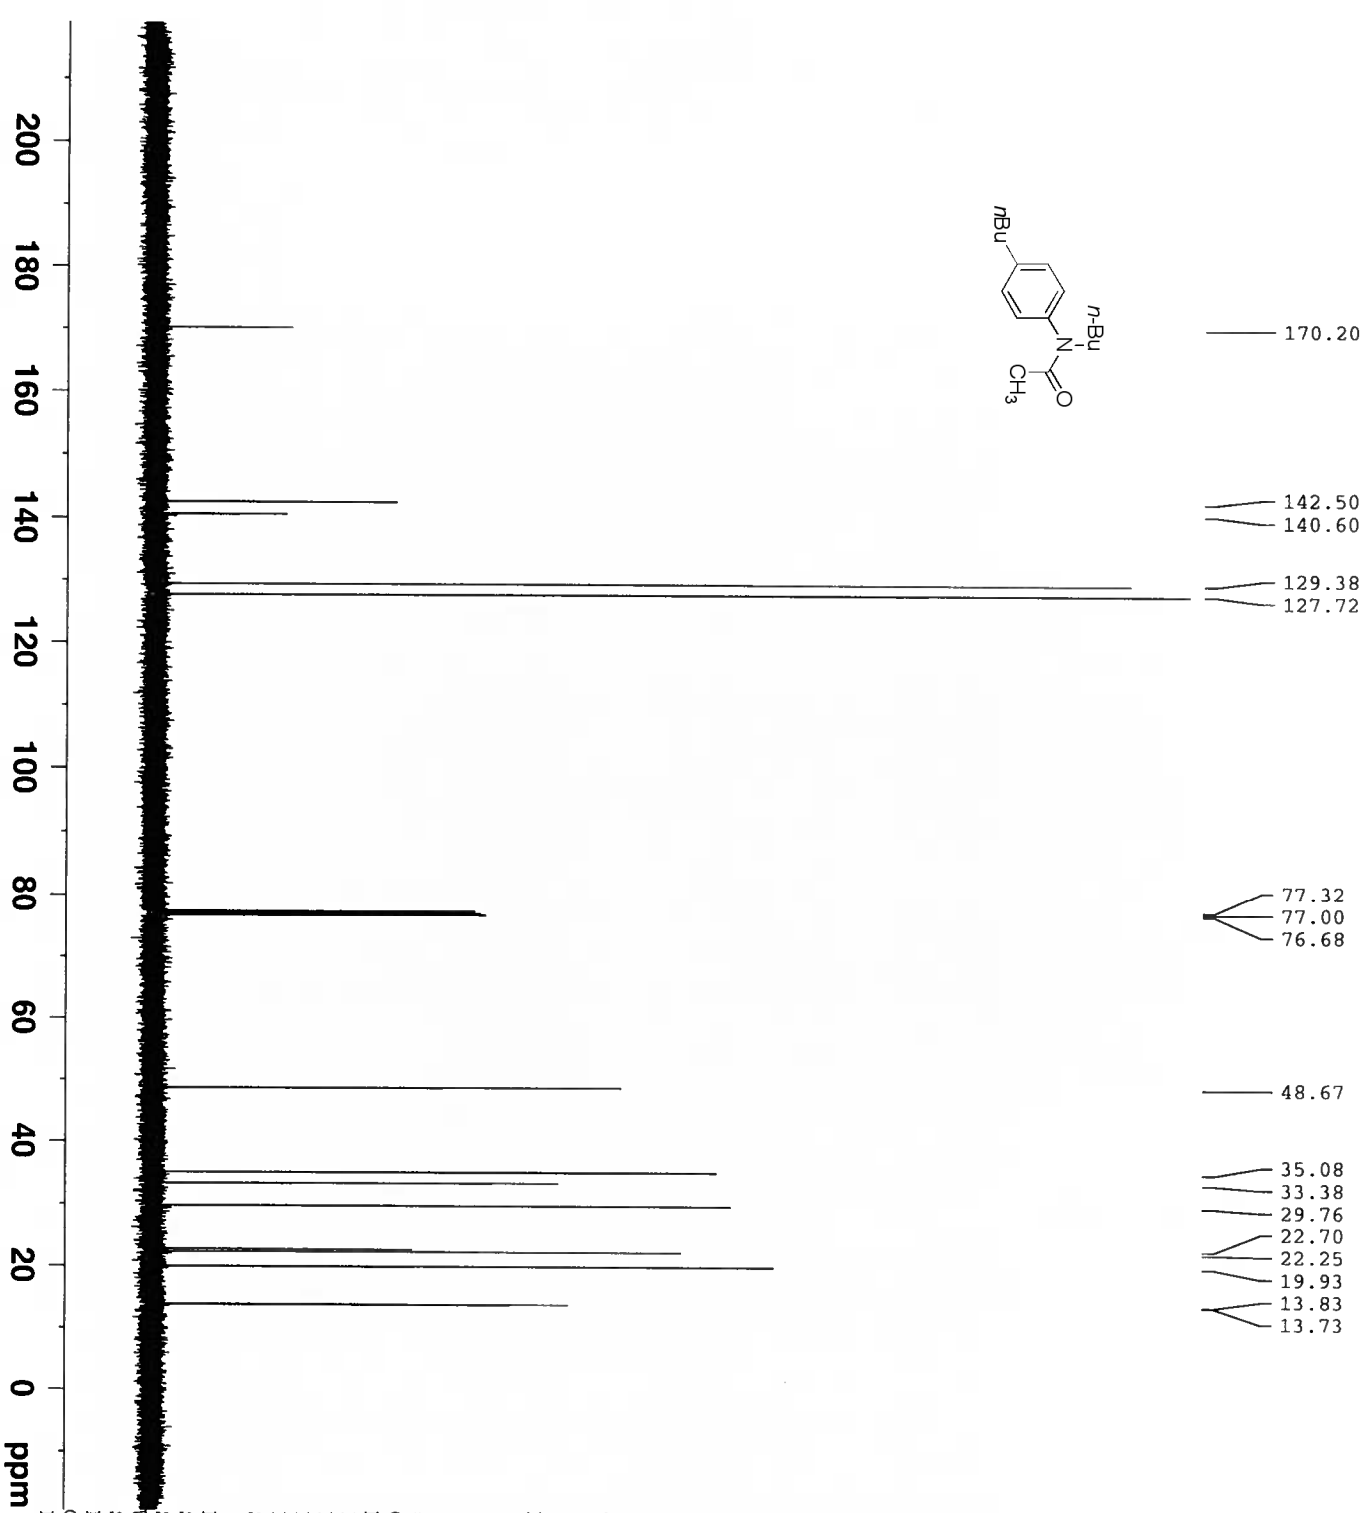

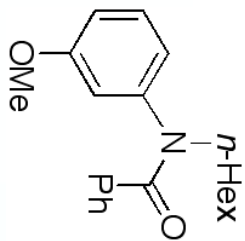

Current Data Parameters  
 NAME jdh-2-273  
 EXPNO 1  
 PROCNO 1

F2 - Acquisition Parameters  
 Date\_ 20080924  
 Time 17.52  
 INSTRUM spect  
 PROBHD 5 mm BBO BB-1H  
 PULPROG zg30  
 TD 65536  
 SOLVENT CDCl3  
 NS 16  
 DS 2  
 SMH 8278.146  
 FIDRES 0.126314  
 AQ 3.9584243  
 RG 181  
 DW 60.400  
 DE 6.00  
 TE 293.2  
 D1 1.00000000  
 TD0 1

==== CHANNEL f1 =====  
 NUC1 1H  
 P1 15.07  
 PL1 0.00  
 SFO1 400.1324710

F2 - Processing parameters  
 SI 65536  
 SF 400.1300095  
 WDW no  
 SSB 0  
 LB 0.00  
 GB 0  
 PC 1.00

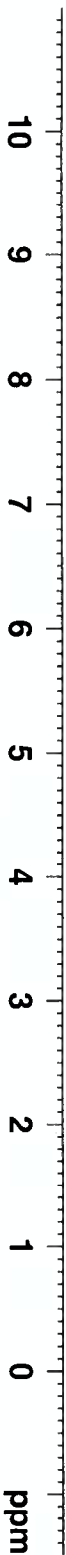



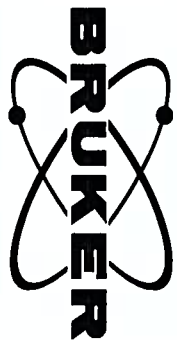

Current Data Parameters  
 NAME jdh-2-273-c13  
 EXPNO 1  
 PROCNO 1

F2 - Acquisition Parameters  
 Date\_ 20080924  
 Time 18.02

INSTRUM spect  
 PROBHD 5 mm BBO BB-1H  
 PULPROG zgpg30  
 TD 65536  
 SOLVENT CDCl3  
 NS 128  
 DS 2

SWH 23980.814 Hz  
 FIDRES 0.365918 Hz  
 AQ 1.3664756 sec  
 RG 13004  
 DW 20.850 usec  
 DE 6.00 usec  
 TE 293.2 K

D1 2.00000000 sec  
 d11 0.03000000 sec  
 DELTA 1.89999998 sec  
 TD0 1

==== CHANNEL f1 =====  
 NUC1 13C  
 P1 8.75 usec  
 PL1 -3.00 dB  
 SF01 100.6228298 MHz

==== CHANNEL f2 =====  
 CPDPRG2 waltz16  
 NUC2 1H  
 PCPD2 90.00 usec  
 PL2 -1.00 dB  
 PL12 14.52 dB  
 PL13 18.00 dB  
 SF02 400.1316005 MHz

F2 - Processing parameters  
 SI 65536  
 SF 100.6127792 MHz  
 WDW no  
 SSB 0  
 LB 0.00 Hz  
 GB 0  
 PC 1.40

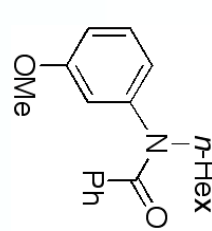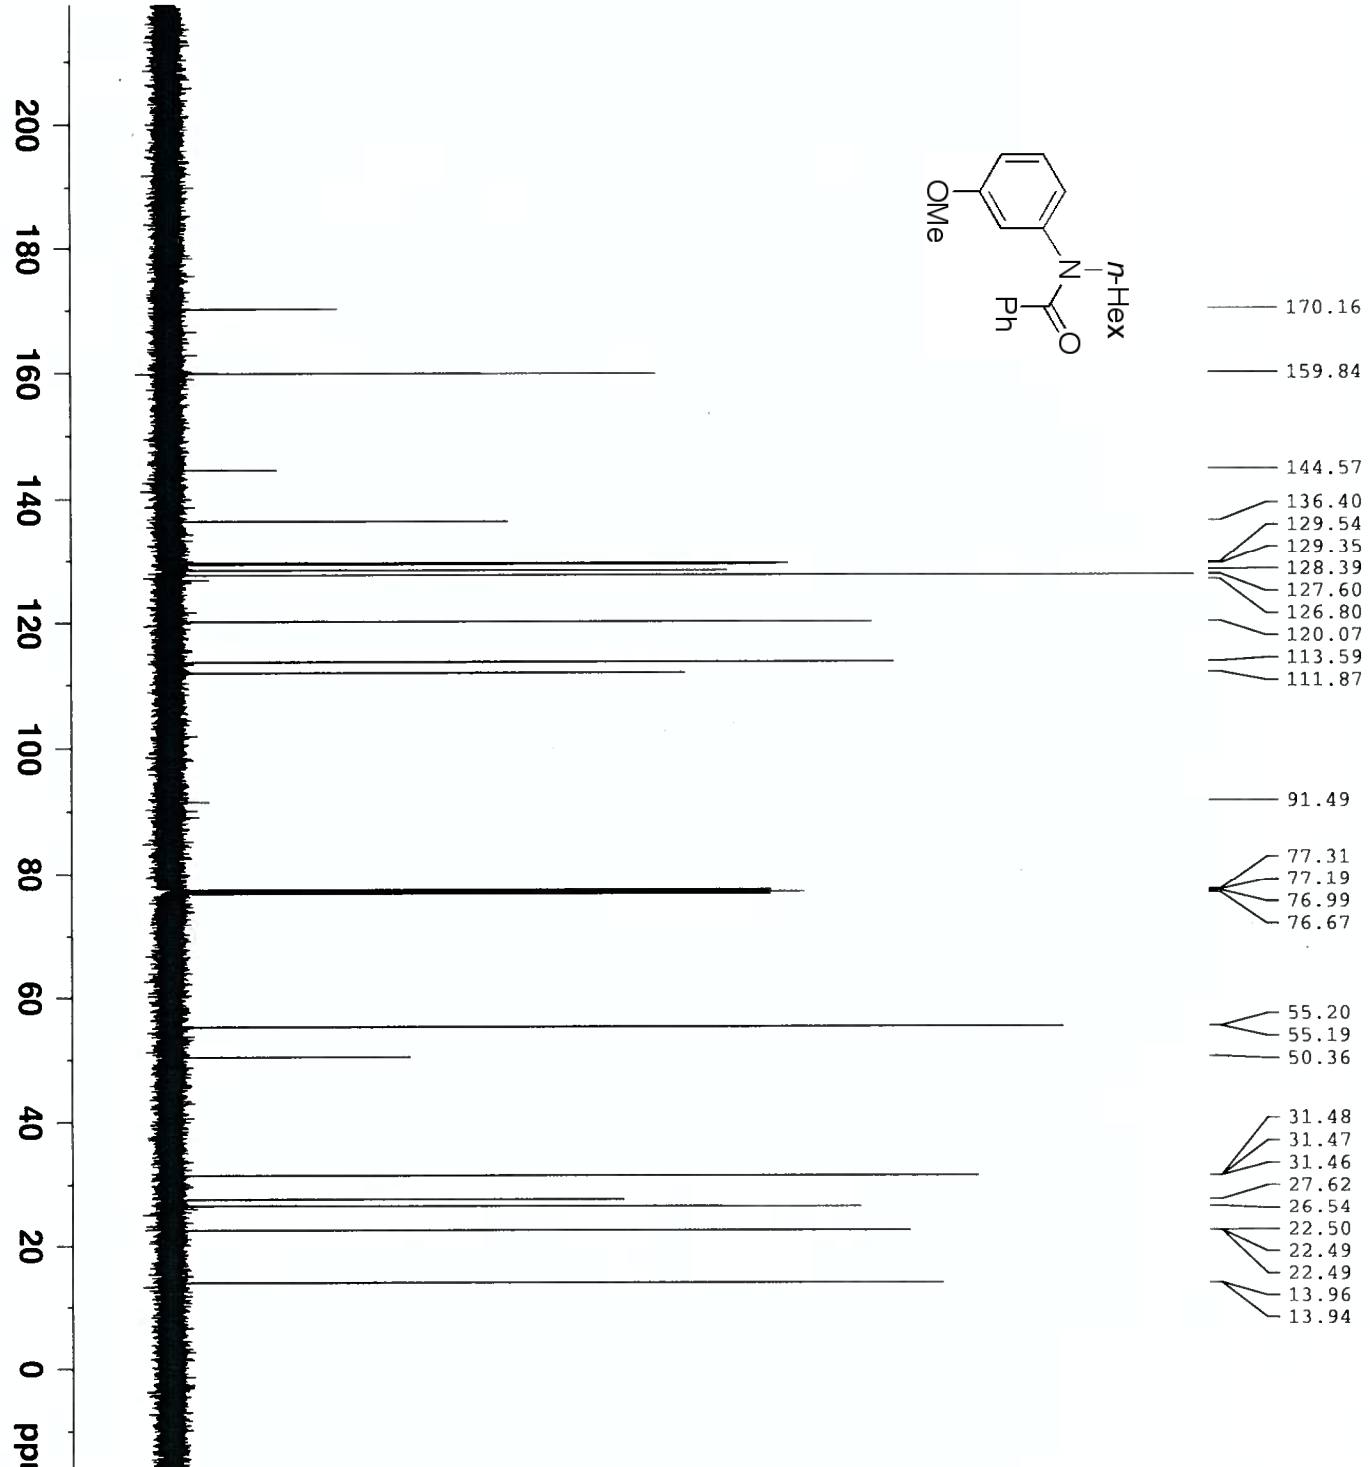

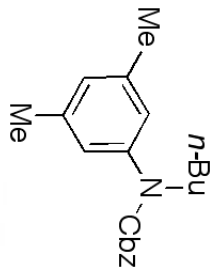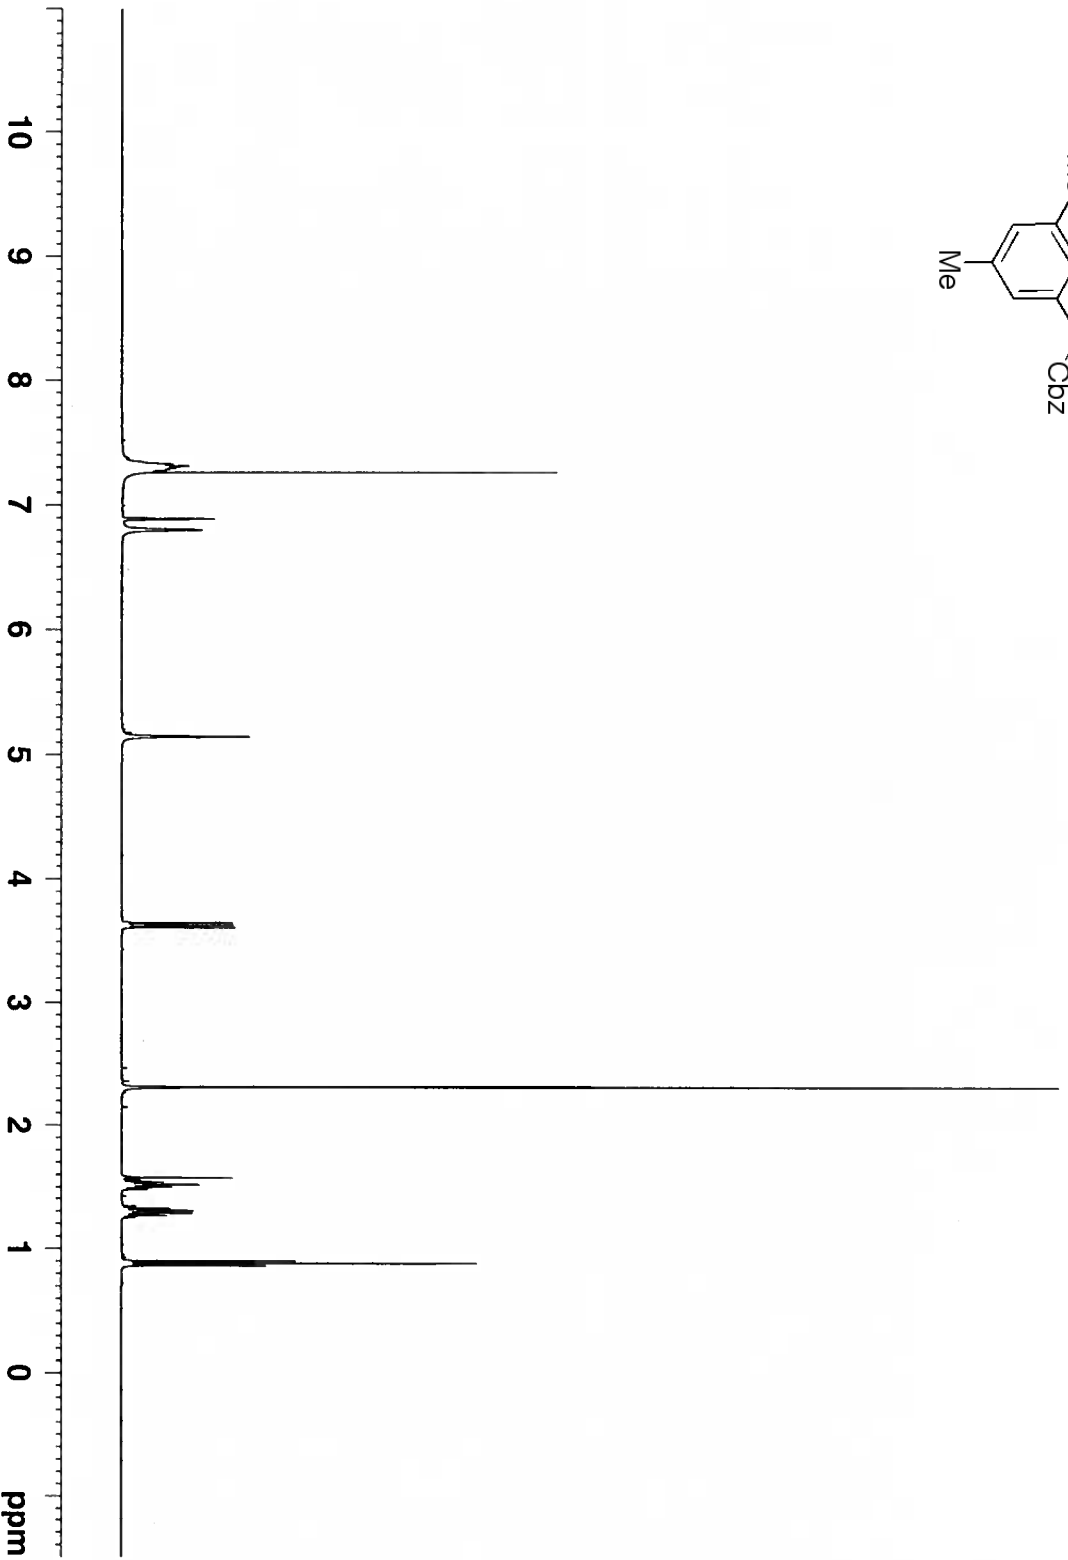

Current Data Parameters  
 NAME jdh-2-281-2  
 EXPNO 1  
 PROCNO 1

F2 - Acquisition Parameters

Date\_ 20081001  
 Time 15.02  
 INSTRUM spect  
 PROBHD 5 mm BBO BB-1H  
 PULPROG zg30  
 TD 65536  
 SOLVENT CDCl3  
 NS 16  
 DS 2  
 SWH 8278.146  
 FIDRES 0.126314  
 AQ 3.9584243  
 RG 128  
 DW 60.400  
 DE 6.00  
 TE 293.2  
 D1 1.00000000  
 TD0 1

==== CHANNEL f1 ====  
 NUCL 1H  
 P1 15.07  
 PL1 0.00  
 SF01 400.1324710

F2 - Processing parameters  
 SI 65536  
 SF 400.1300101  
 WDW no  
 SSB 0  
 LB 0.00  
 GB 0  
 PC 1.00

13C-dcif parameter set

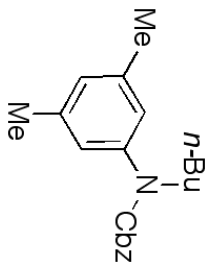

- 155.32
- 138.30
- 136.77
- 128.21
- 128.17
- 127.56
- 127.36
- 124.87
- 77.31
- 76.99
- 76.67
- 66.74
- 50.13
- 30.25
- 21.06
- 19.73
- 13.65

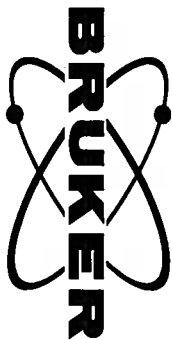

Current Data Parameters  
 NAME jdh-2-281-C13-2  
 EXPNO 1  
 PROCNO 1

F2 - Acquisition Parameters

Date\_ 20081002  
 Time 15.41  
 INSTRUM spect  
 PROBH D 5 mm BBO BB-1H  
 PULPROG zgpg30  
 TD 65536  
 SOLVENT CDCl3  
 NS 128  
 DS 2  
 SWH 23980.814 Hz  
 FIDRES 0.365918 Hz  
 A Q 1.3664756 sec  
 RG 14596.5  
 DW 20.850 usec  
 DE 6.00 usec  
 TE 293.2 K  
 D1 2.00000000 sec  
 d11 0.03000000 sec  
 DELTA 1.89999998 sec  
 TD0 1

==== CHANNEL F1 =====

NUC1 13C  
 P1 8.75 usec  
 PL1 -3.00 dB  
 SFO1 100.6228298 MHz

==== CHANNEL F2 =====

CPDPRG2 waltz16  
 NUC2 1H  
 PCPD2 90.00 usec  
 PL2 -1.00 dB  
 PL12 14.52 dB  
 PL13 18.00 dB  
 SFO2 400.1316005 MHz

F2 - Processing parameters

SI 65536  
 SF 100.6127939 MHz  
 WDW no  
 SSB 0  
 LB 0.00 Hz  
 GB 0  
 PC 1.40

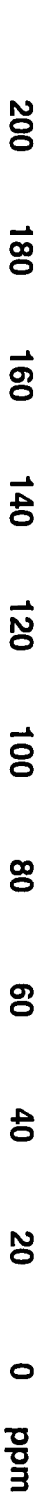

STANDARD 1H OBSERVE

expl std1h

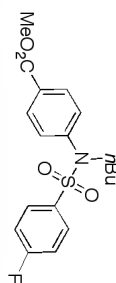

SAMPLE 2 2008 DEC. & VI 300.107  
 date Aug 2008 dfrq 300.107  
 solvent GDC13 dn H1  
 file /data/export/~ dpwr 30  
 home/s1buch/BCacue~ dof 0  
 /mrhat/1b1-66-h.f~ dm nnn  
 id C  
 ACQUISITION 300.108 dmf 200  
 temp 20.0  
 PROCESSING  
 ft  
 131072  
 at 4.003 wf file  
 np 48052 proc  
 sw 6002.4 fn  
 not used  
 fb not used  
 bs 16 wert  
 tpwr 54 wexp  
 pw 3.0 wbs  
 dl 0.050 wnt  
 tof 867.7  
 nt 8  
 ct 8  
 allock n  
 gain not used  
 flags  
 i1 n  
 in n  
 dp y  
 DISPLAY  
 sp -657.0  
 wp 6002.3  
 vs 151  
 sc 0  
 wc 250  
 hzmm 24.01  
 is 500.00  
 rfi 2838.9  
 rfp 2181.8  
 th 8  
 tns 3.000  
 nm  
 ph

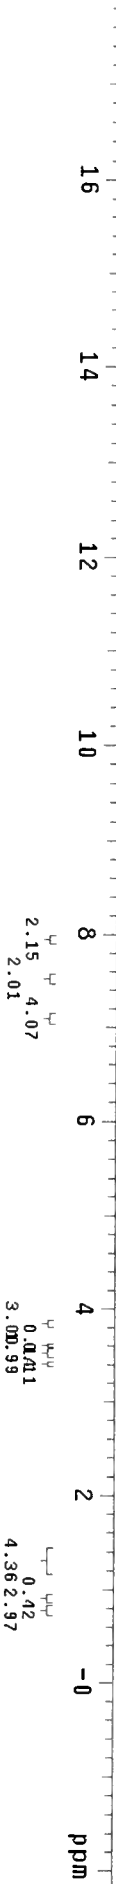

13C OBSERVE

expt std13c

SAMPLE DEC. & VT  
date Jul 29 2008 dfrq 300.107  
solvent CDC13 dn H1  
file /data/export/~ dpwr 39  
home/s/buch/Bcactu~ dof 0  
/mrhat/atbl-51-c-pr ure.fid dmm YYY  
ure.fid dmm W  
ACQUISITION temp 11000  
sfrq 75.471 dmfr 20.0  
in C13 PROCESSING  
at 1.500 sb -1.500  
np 67874 sbs -1.500  
sw 22624.4 wf file  
fb 12400 proc  
bs 12400 fn ft  
tpwr 55 262144  
pw 10.0 wefr  
dl 0.500 wexp  
tof 2264.0 wbs  
nt 1000 wnt  
ct 64  
atlock n  
gain not used  
FLAGS  
ll n  
in n  
dp Y  
DISPLAY  
SP -1522.0  
WP 22624.3  
VS 31  
SC 0  
WC 250  
hzm 90.50  
ts 500.00  
rf1 7332.7  
rfp 5810.5  
th 9  
ins 100.000  
ai ph

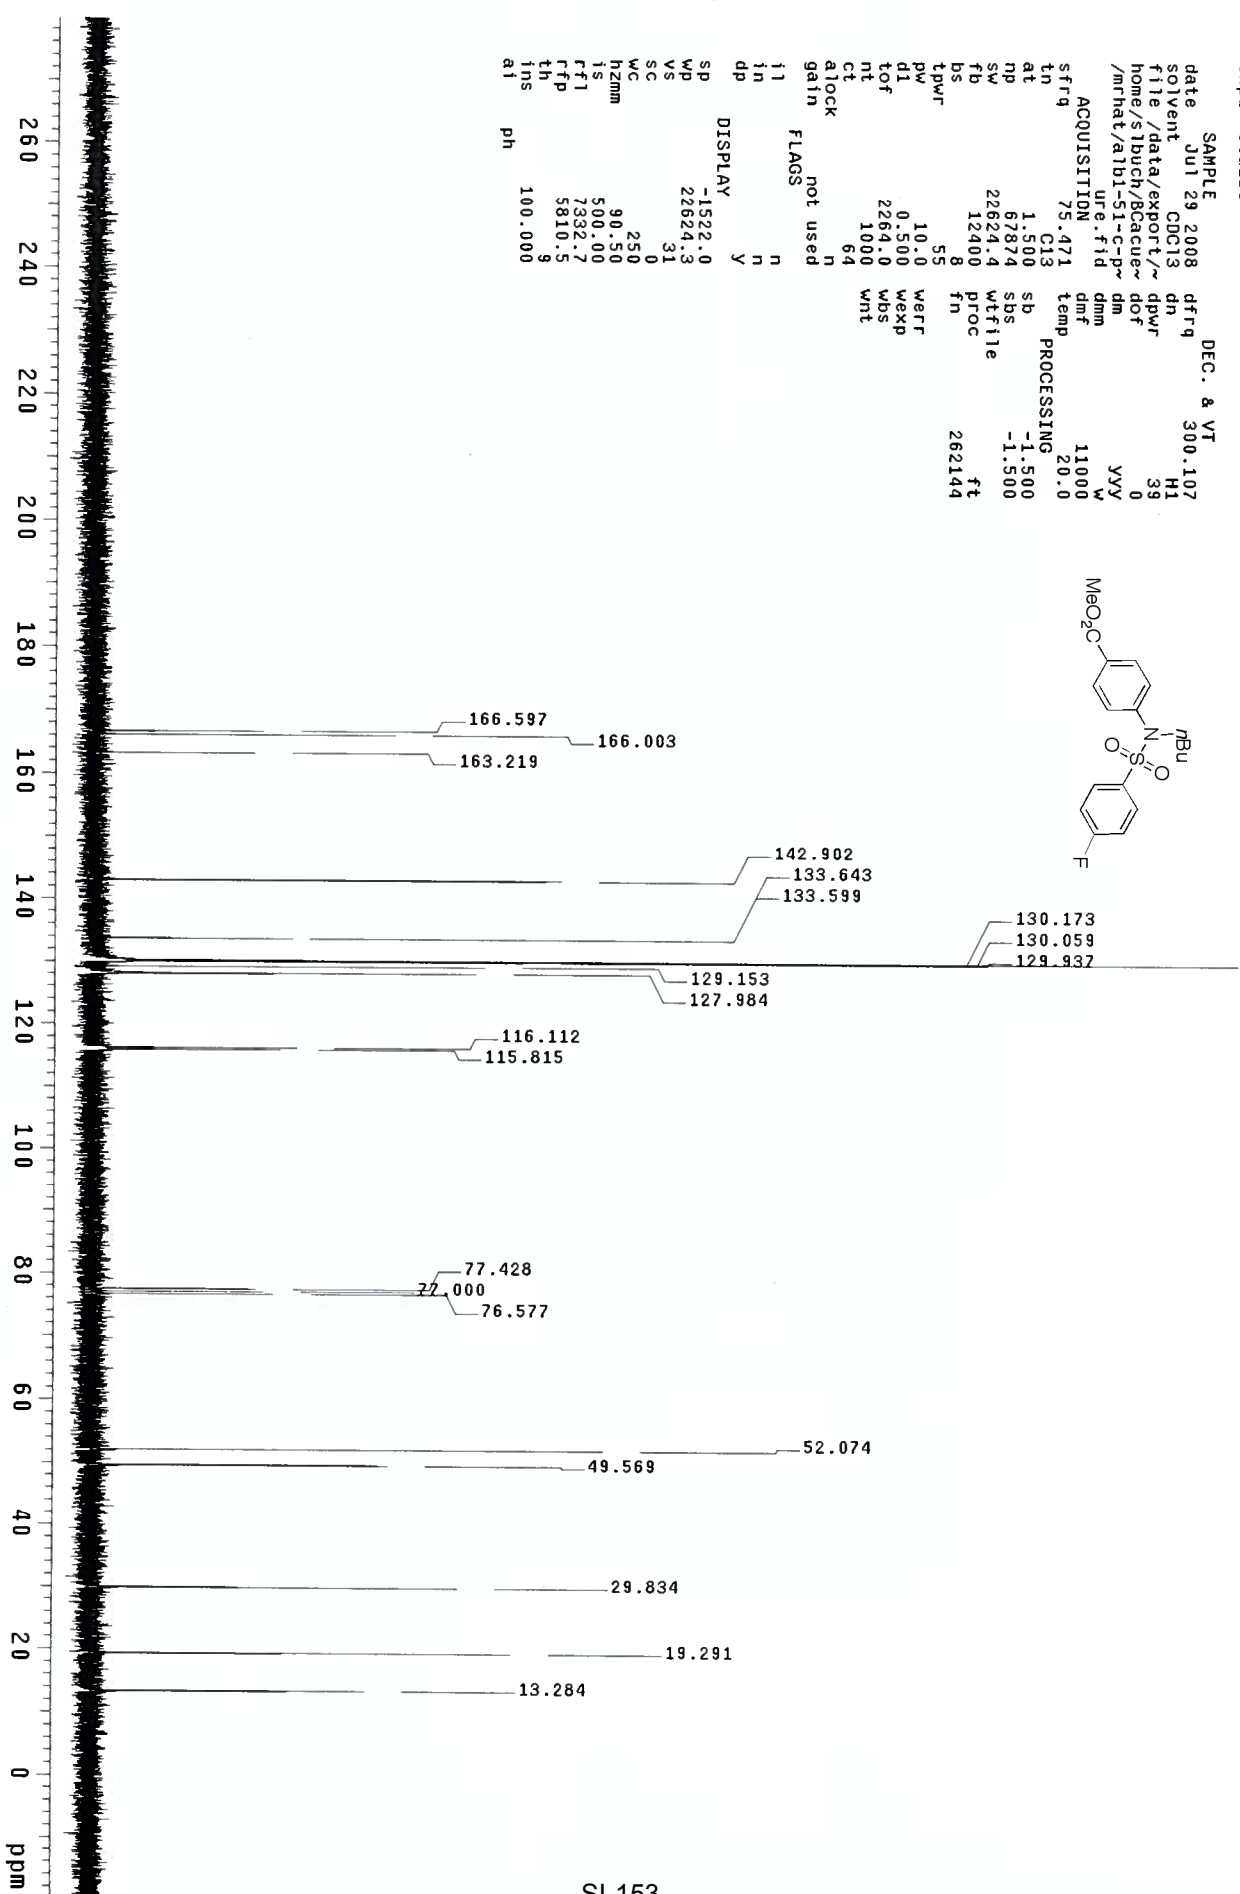

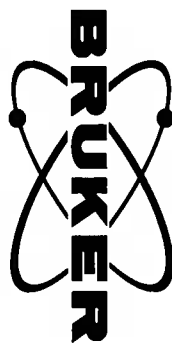

Current Data Parameters  
NAME jdh-3-258  
EXPNO 1  
PROCNO 1

F2 - Acquisition Parameters  
Date\_ 20090414  
Time 18.10  
INSTRUM spect  
PROBHD 5 mm QNP 1H/13  
PULPROG zg30  
TD 65536  
SOLVENT CDCl3  
NS 16  
DS 2  
SWH 8278.146 Hz  
FIDRES 0.126314 Hz  
AQ 3.9584243 sec  
RG 181  
DW 60.400 usec  
DE 6.00 usec  
TE 291.2 K  
D1 1.00000000 sec  
TD0 1

==== CHANNEL f1 =====  
NUC1 1H  
P1 13.88 usec  
PL1 0.00 dB  
SF01 400.1324710 MHz  
F2 - Processing parameters  
SI 65536  
SF 400.1300092 MHz  
WDW no  
SSB 0  
LB 0.00 Hz  
GB 0  
PC 1.00

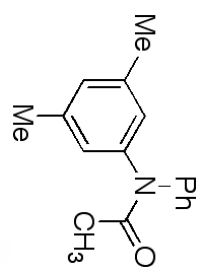

7.345  
7.291  
7.288  
7.269  
7.261  
7.259  
6.889

2.300  
2.058

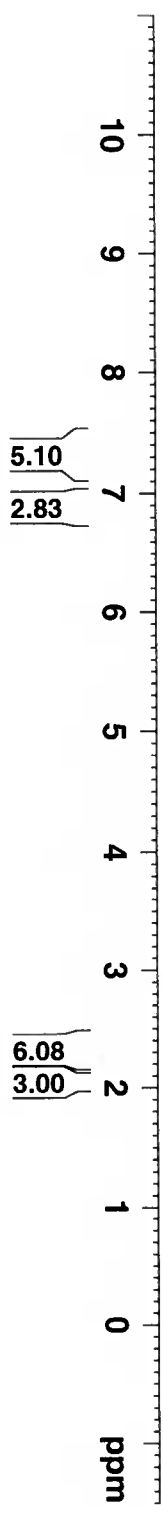

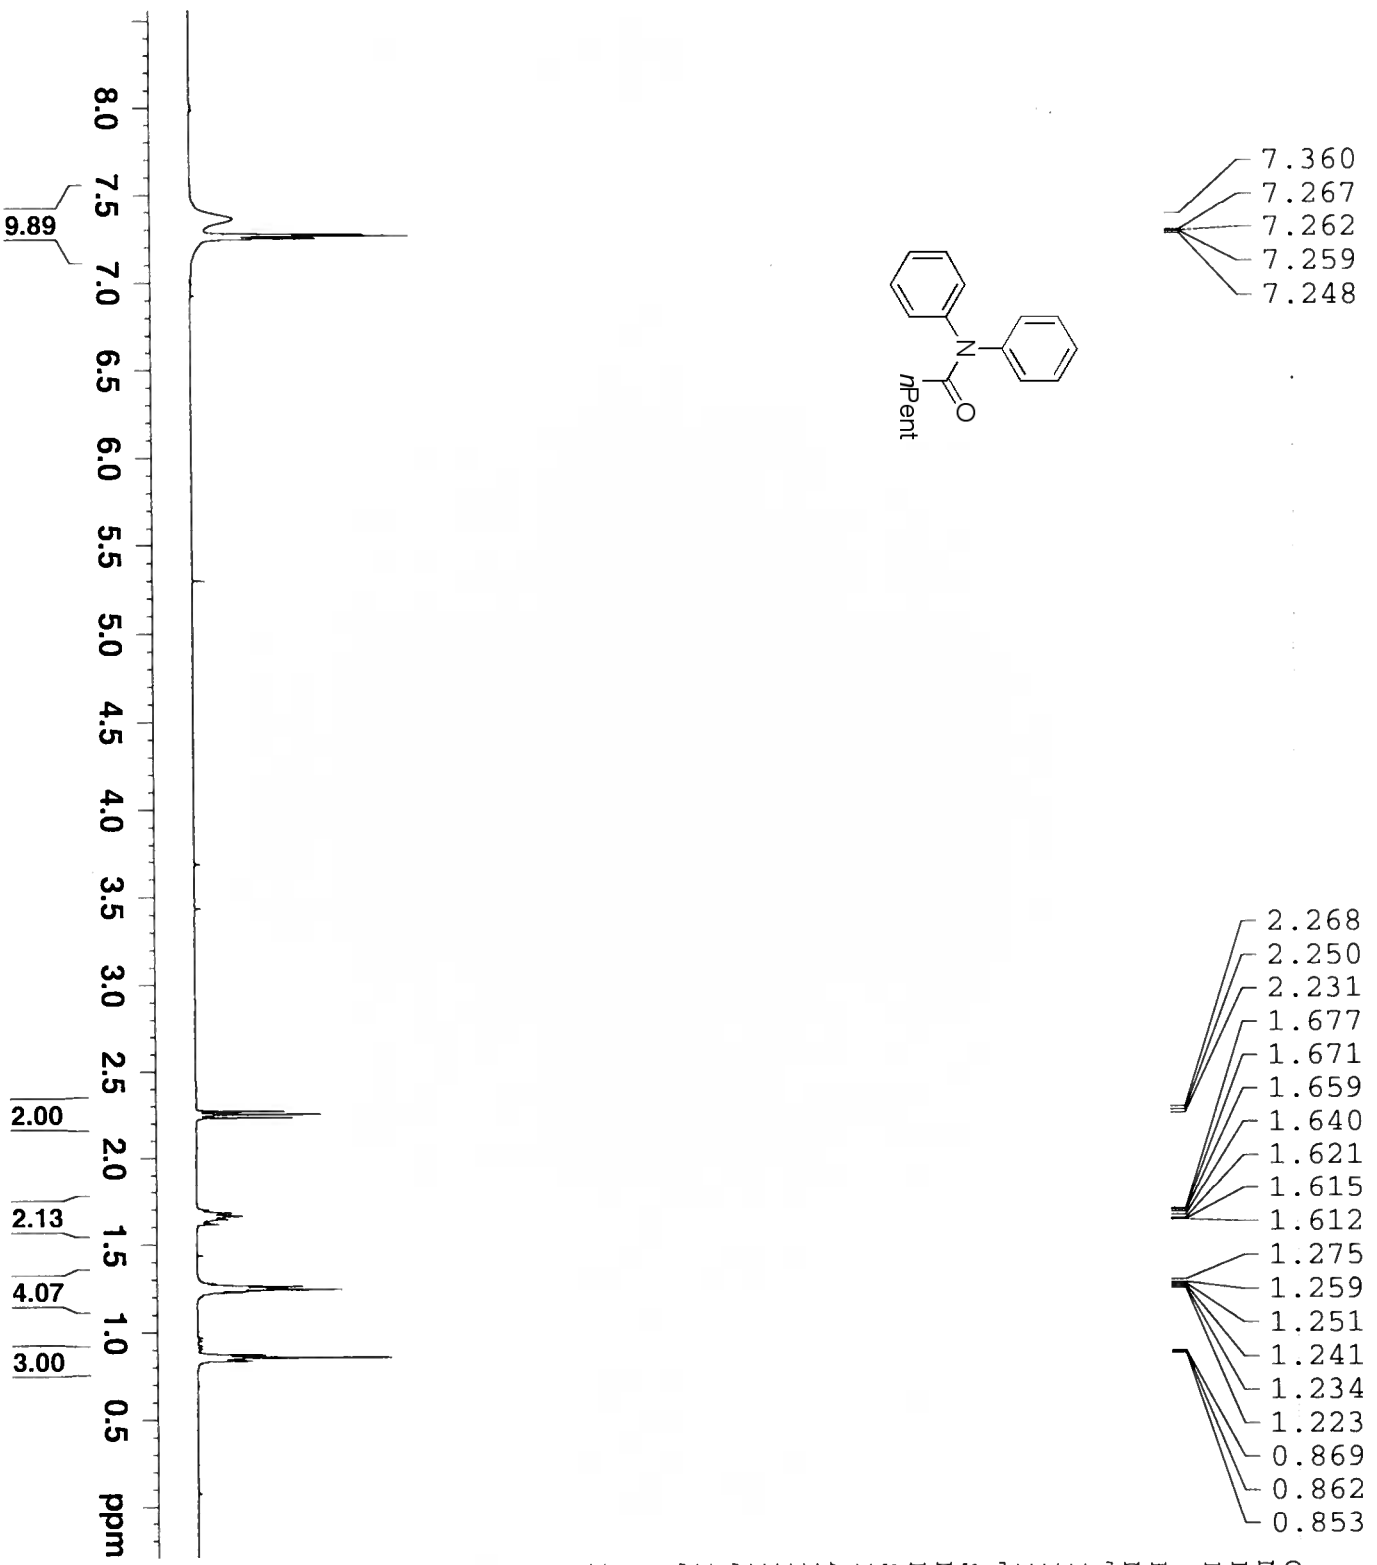

7.360  
7.267  
7.262  
7.259  
7.248

2.268  
2.250  
2.231  
1.677  
1.671  
1.659  
1.640  
1.621  
1.615  
1.612  
1.275  
1.259  
1.251  
1.241  
1.234  
1.223  
0.869  
0.862  
0.853

Current Data Parameters  
NAME jdh-3-261-2  
EXPNO 1  
PROCNO 1

F2 - Acquisition Parameters

Date\_ 20090416  
Time 11.38  
INSTRUM spect  
PROBHD 5 mm BBO BB-1H  
PULPROG zg30  
TD 65536  
SOLVENT CDCl3  
NS 16  
DS 2  
SWH 8278.146  
FIDRES 0.126314  
AQ 3.9584243  
RG 128  
DW 60.400  
DE 6.00  
TE 293.2  
D1 1.00000000  
TD0 1

==== CHANNEL f1 ====  
NUC1 1H  
P1 15.07  
PL1 0.00  
SFO1 400.1324710

F2 - Processing parameters  
SI 65536  
SF 400.1300094  
WDW no  
SSB 0  
LB 0.00  
GB 0  
PC 1.00

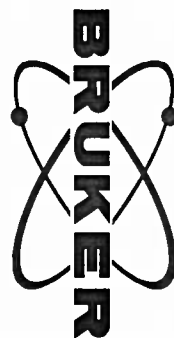

Current Data Parameters  
 NAME jdh-3-261-c13-2  
 EXPNO 1  
 PROCNO 1

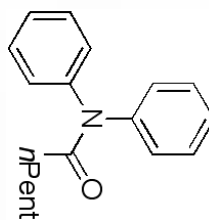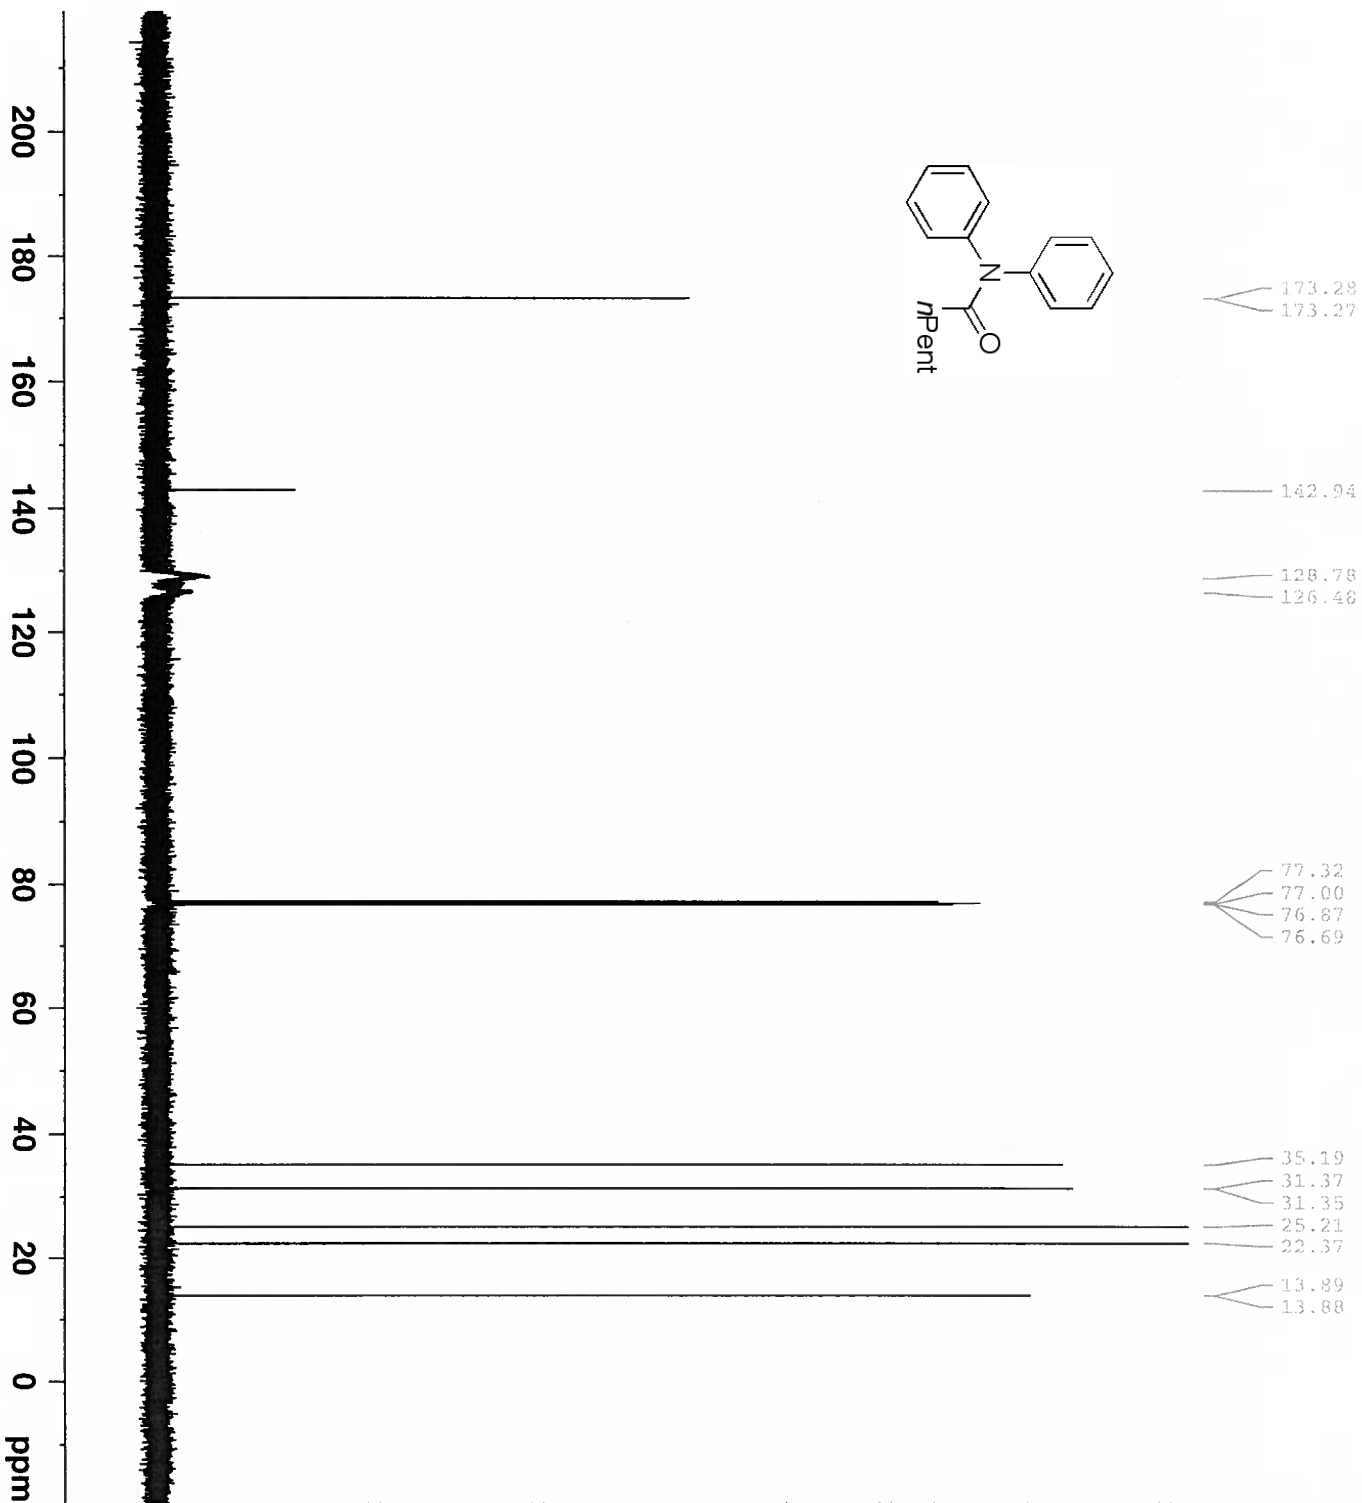

F2 - Acquisition Parameters

Date\_ 20090415  
 Time 21.58  
 INSTRUM spect  
 PROBHD 5 mm BBO BB-1H  
 PULPROG zgpg30  
 TD 65536  
 SOLVENT CDCl3  
 NS 512  
 DS 2  
 SMH 23980.814 Hz  
 FIDRES 0.365918 Hz  
 AQ 1.3664756 sec  
 RG 8192  
 DW 20.850 usec  
 DE 6.00 usec  
 TE 293.2 K  
 D1 2.00000000 sec  
 d11 0.03000000 sec  
 DELTA 1.89999998 sec  
 TDO 1

==== CHANNEL F1 =====  
 NUC1 13C  
 P1 8.75 usec  
 PL1 -3.00 dB  
 SFO1 100.6228298 MHz

==== CHANNEL F2 =====  
 CPDPRG2 waltz16  
 NUC2 1H  
 PCPD2 90.00 usec  
 PL2 -1.00 dB  
 PL12 14.52 dB  
 PL13 18.00 dB  
 SFO2 400.1316005 MHz

F2 - Processing parameters  
 SI 65536  
 SF 100.6127771 MHz  
 MIDW no  
 SSB 0  
 LB 0.00 Hz  
 GB 0  
 PC 1.40



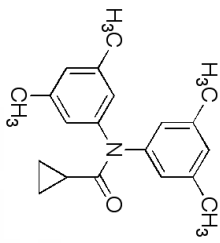

7.259  
7.258  
6.906

2.292  
1.600  
1.560  
1.552  
1.549  
1.541  
1.532  
1.529  
1.521  
1.112  
1.103  
1.100  
1.095  
1.092  
1.087  
1.084  
1.075  
0.722  
0.713  
0.705  
0.702

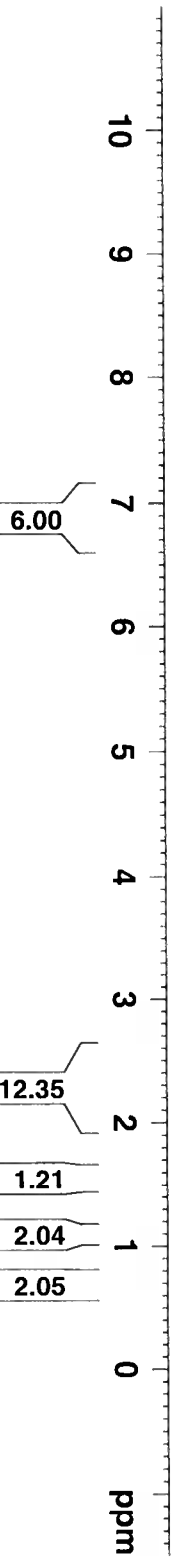

Current Data Parameters  
NAME jdh-3-262-h1-2  
EXPNO 1  
PROCNO 1

F2 - Acquisition Parameters

Date\_ 20090428  
Time 12.09  
INSTRUM spect  
PROBHD 5 mm BBO BB-1H  
PULPROG zg30  
TD 65536  
SOLVENT CDCl3  
NS 16  
DS 2  
SWH 8278.146  
FIDRES 0.126314  
AQ 3.9584243  
RG 128  
DW 60.400  
DE 6.00  
TE 293.2  
D1 1.00000000  
TD0 1

==== CHANNEL f1 ====  
NUC1 1H  
P1 15.07  
PL1 0.00  
SFO1 400.1324710  
F2 - Processing parameters  
SI 65536  
SF 400.1300100  
WDW no  
SSB 0  
LB 0.00  
GB 0  
PC 1.00

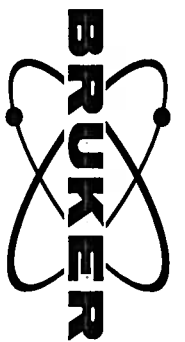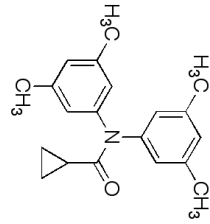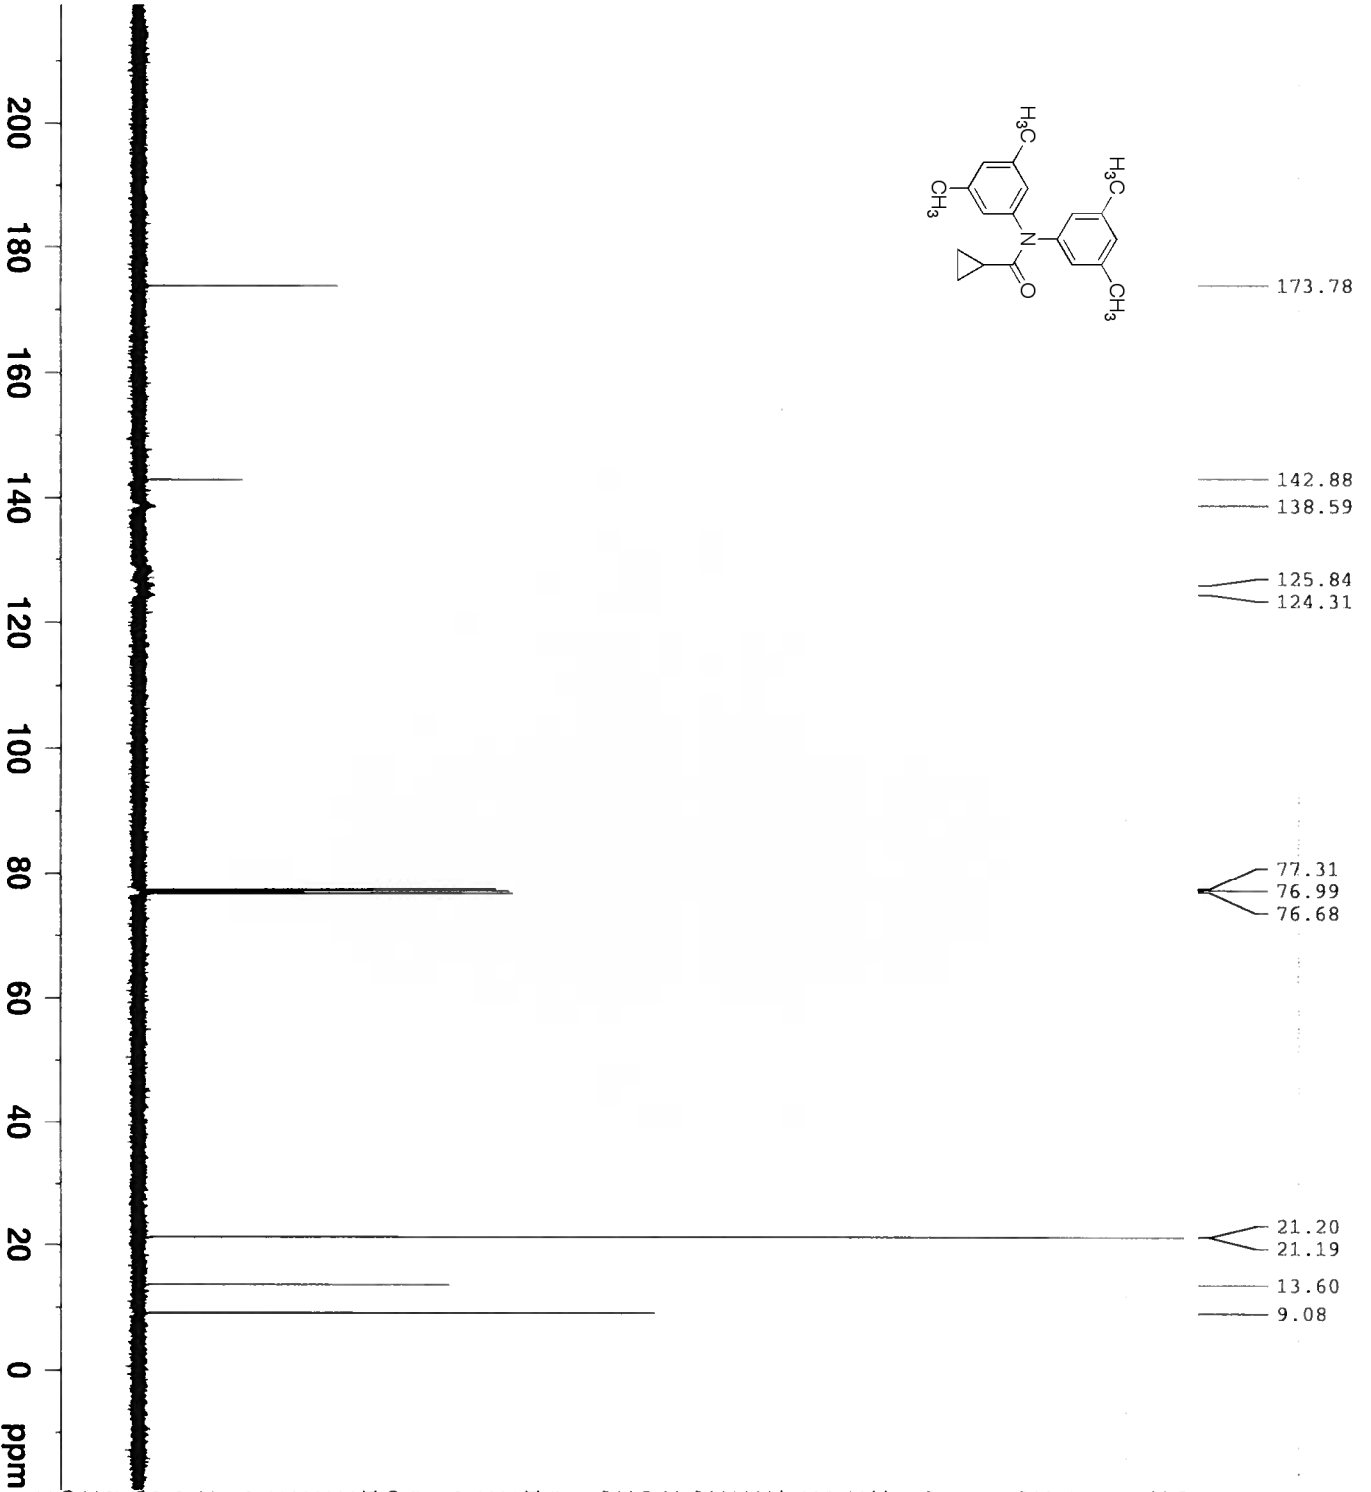

Current Data Parameters  
 NAME jdh-3-262-C13-2  
 EXPNO 1  
 PROCNO 1

F2 - Acquisition Parameters

Date\_ 20090428  
 Time 12.36  
 INSTRUM spect  
 PROBHD 5 mm BBO BB-1H  
 PULPROG zgpg30  
 TD 65536  
 SOLVENT CDCl3  
 NS 385  
 DS 2  
 SWH 23980.814 Hz  
 FIDRES 0.365918 Hz  
 AQ 1.3664756 sec  
 RG 8192  
 DW 20.850 usec  
 DE 6.00 usec  
 TE 293.2 K  
 DI 2.0000000 sec  
 d11 0.0300000 sec  
 DELTA 1.89999998 sec  
 TD0 1

==== CHANNEL f1 =====  
 NUC1 13C  
 P1 8.75 usec  
 PL1 -3.00 dB  
 SFO1 100.6228298 MHz

==== CHANNEL f2 =====  
 CPDPRG2 waltz16  
 NUC2 1H  
 PCPD2 90.00 usec  
 PL2 -1.00 dB  
 PL12 14.52 dB  
 PL13 18.00 dB  
 SFO2 400.1316005 MHz

F2 - Processing parameters  
 SI 65536  
 SF 100.6127775 MHz  
 WDW no  
 SSB 0  
 LB 0.00 Hz  
 GB 0  
 PC 1.40

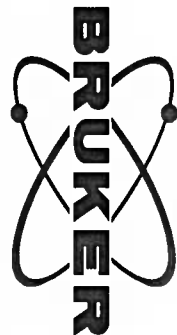

Current Data Parameters  
 NAME jdh-3-263  
 EXPNO 1  
 PROCNO 1

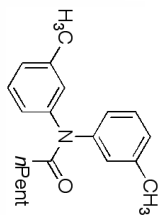

7.258  
7.232  
7.186  
7.074  
7.054  
6.994

2.332  
2.294  
2.254  
2.236  
2.217  
1.688  
1.682  
1.669  
1.663  
1.651  
1.632  
1.611  
1.274  
1.259  
1.250  
1.241  
1.233  
1.223  
1.216  
0.903  
0.869  
0.853

F2 - Acquisition Parameters

Date\_ 20090416  
 Time 15.11  
 INSTRUM spect  
 PROBHD 5 mm QNP 1H/13  
 PULPROG zg30  
 TD 65536  
 SOLVENT CDC13  
 NS 16  
 DS 2  
 SWH 8278.146 Hz  
 FIDRES 0.126314 Hz  
 AQ 3.9584243 sec  
 RG 228.1  
 DW 60.400 usec  
 DE 6.00 usec  
 TE 291.2 K  
 D1 1.00000000 sec  
 TD0 1

==== CHANNEL f1 =====

NUC1 1H  
 P1 13.88 usec  
 PL1 0.00 dB  
 SFO1 400.1324710 MHz

F2 - Processing parameters

SI 65536  
 SF 400.1300103 MHz  
 WDW no  
 SSB 0  
 LB 0.00 Hz  
 GB 0  
 PC 1.00

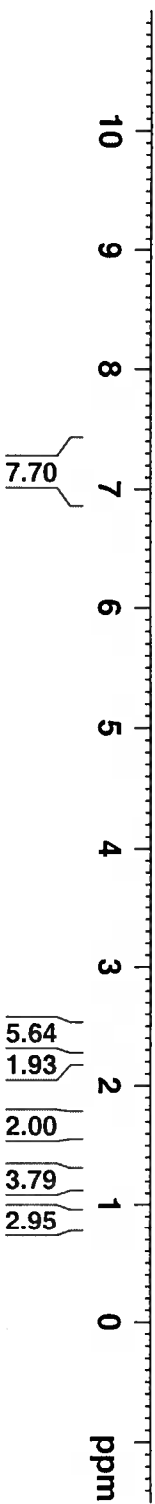

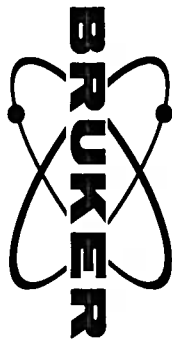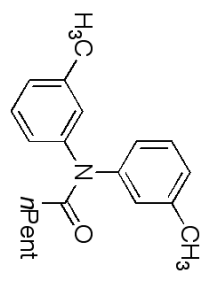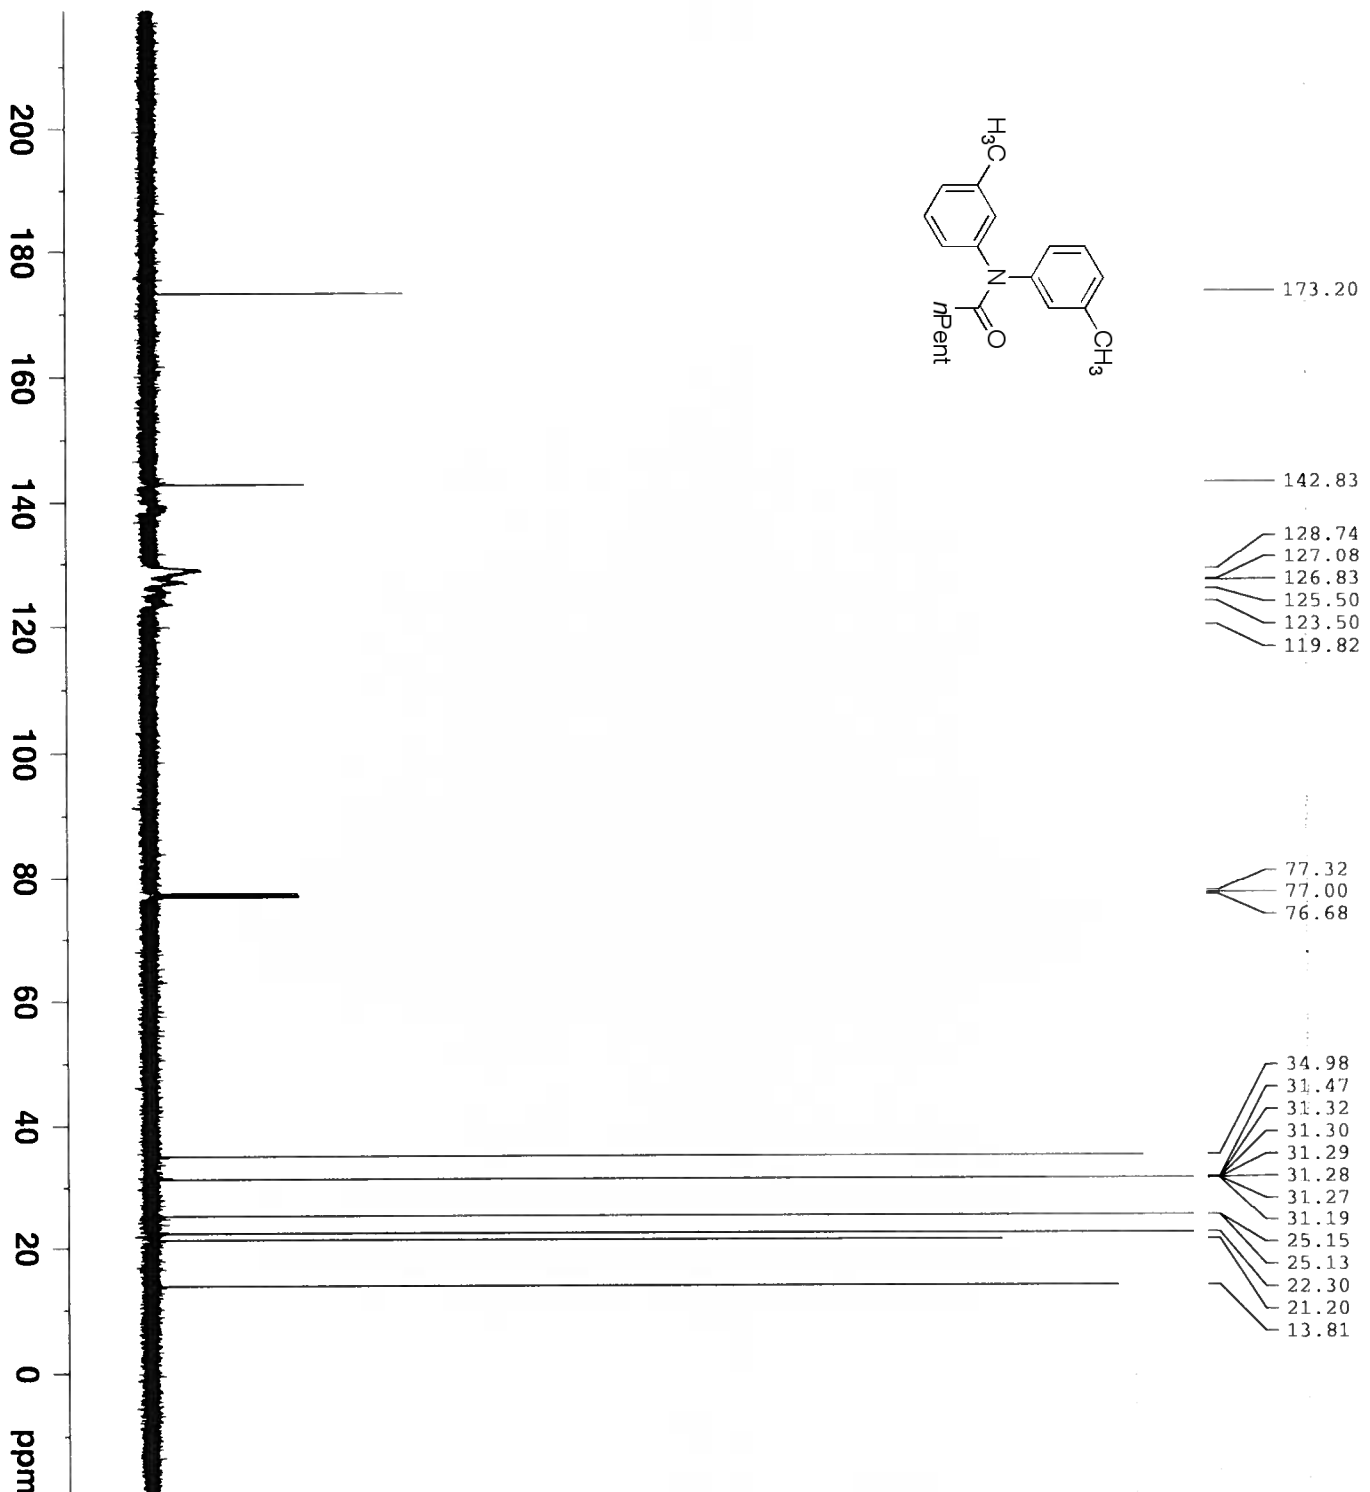

Current Data Parameters  
 NAME jdh-3-263-C13-2  
 EXPNO 1  
 PROCNO 1

F2 - Acquisition Parameters  
 Date\_ 20090417  
 Time 13.32

INSTRUM spect  
 PROBHD 5 mm BBO BB-1H  
 PULPROG zgpg30  
 TD 65536  
 SOLVENT CDC13  
 NS 257  
 DS 2

SWH 23980.814 Hz  
 FIDRES 0.365918 Hz  
 AQ 1.3664756 sec  
 RG 14596.5  
 DM 20.850 usec  
 DE 6.00 usec  
 TE 293.2 K

D1 2.0000000 sec  
 d11 0.0300000 sec  
 DELTA 1.89999998 sec  
 TD0 1

==== CHANNEL f1 =====  
 NUC1 13C  
 P1 8.75 usec  
 PL1 -3.00 dB  
 SFO1 100.6228298 MHz

==== CHANNEL f2 =====  
 CPDPRG2 waltz16  
 NUC2 1H  
 PCPD2 90.00 usec  
 PL2 -1.00 dB  
 PL12 14.52 dB  
 PL13 18.00 dB  
 SFO2 400.1316005 MHz

F2 - Processing parameters  
 SI 65536  
 SF 100.6127875 MHz  
 NDM no  
 SSB 0  
 LB 0.00 Hz  
 GB 0  
 PC 1.40

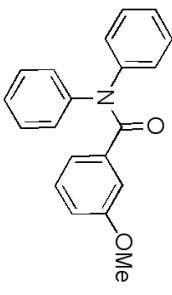

- 7.288
- 7.269
- 7.251
- 7.236
- 7.232
- 7.180
- 7.161
- 7.146
- 7.128
- 7.098
- 7.078
- 7.058
- 6.997
- 6.980
- 6.816
- 6.801
- 6.798
- 6.794

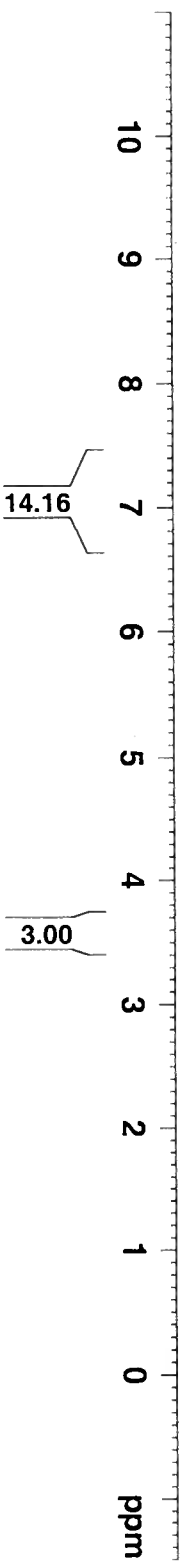

Current Data Parameters  
 Name jdh-3-265a  
 EXPNO 1  
 PROCNO 1

F2 - Acquisition Parameters  
 Date\_ 20090420  
 Time 11.06

INSTRUM 5 mm BBO BB-1H  
 PROBHD spect  
 PULPROG zg30

TD 65536  
 SOLVENT CDCl3

NS 16  
 DS 2

SWH 8278.146  
 FIDRES 0.126314

AQ 3.9584243  
 RG 64

DW 60.400  
 DE 6.00

TE 285.2  
 D1 1.00000000

TD0 1  
 S

==== CHANNEL F1 ====  
 NUCL 1H  
 P1 15.07  
 PL1 0.00  
 SFO1 400.1324710

F2 - Processing parameters  
 SI 65536  
 SF 400.1300212  
 WDW no  
 SSB 0  
 LB 0.00  
 GB 0  
 PC 1.00

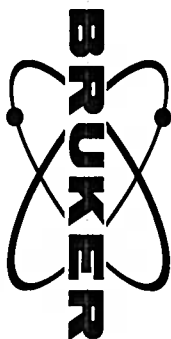

Current Data Parameters  
 NAME jdh-3-265a-c13  
 EXPNO 1  
 PROCNO 1

F2 - Acquisition Parameters

Date\_ 20090420  
 Time 11.25  
 INSTRUM spect  
 PROBHD 5 mm BBO BB-1H  
 PULPROG zgpg30  
 TD 65536  
 SOLVENT CDCl3  
 NS 129  
 DS 2  
 SWH 23980.814 Hz  
 FIDRES 0.365918 Hz  
 AQ 1.3664756 sec  
 RG 13004  
 DW 20.850 usec  
 DE 6.00 usec  
 TE 288.2 K  
 D1 2.00000000 sec  
 d11 0.03000000 sec  
 DELTA 1.89999998 sec  
 TD0 1

==== CHANNEL f1 =====  
 NUC1 13C  
 P1 8.75 usec  
 PL1 -3.00 dB  
 SFO1 100.6228298 MHz

==== CHANNEL f2 =====  
 CPDPRG2 waltz16  
 NUC2 1H  
 PCPDD2 90.00 usec  
 PL2 -1.00 dB  
 PL12 14.52 dB  
 PL13 18.00 dB  
 SFO2 400.1316005 MHz

F2 - Processing parameters  
 SI 65536  
 SF 100.6128031 MHz  
 MWDW no  
 SSB 0  
 LB 0.00 Hz  
 GB 0  
 PC 1.40

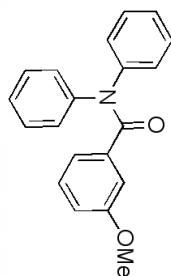

- 170.06
- 158.73
- 143.60
- 136.99
- 128.87
- 128.66
- 127.16
- 126.13
- 121.38
- 116.33
- 113.80
- 77.32
- 77.00
- 76.68
- 54.93

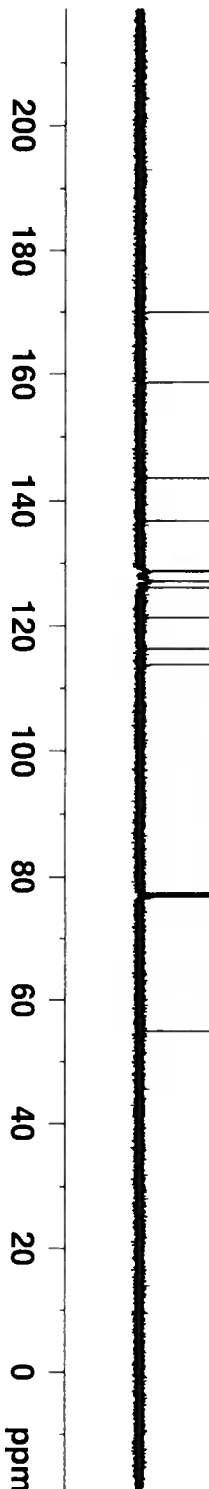

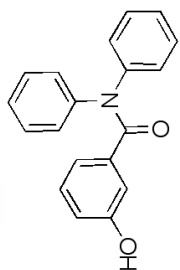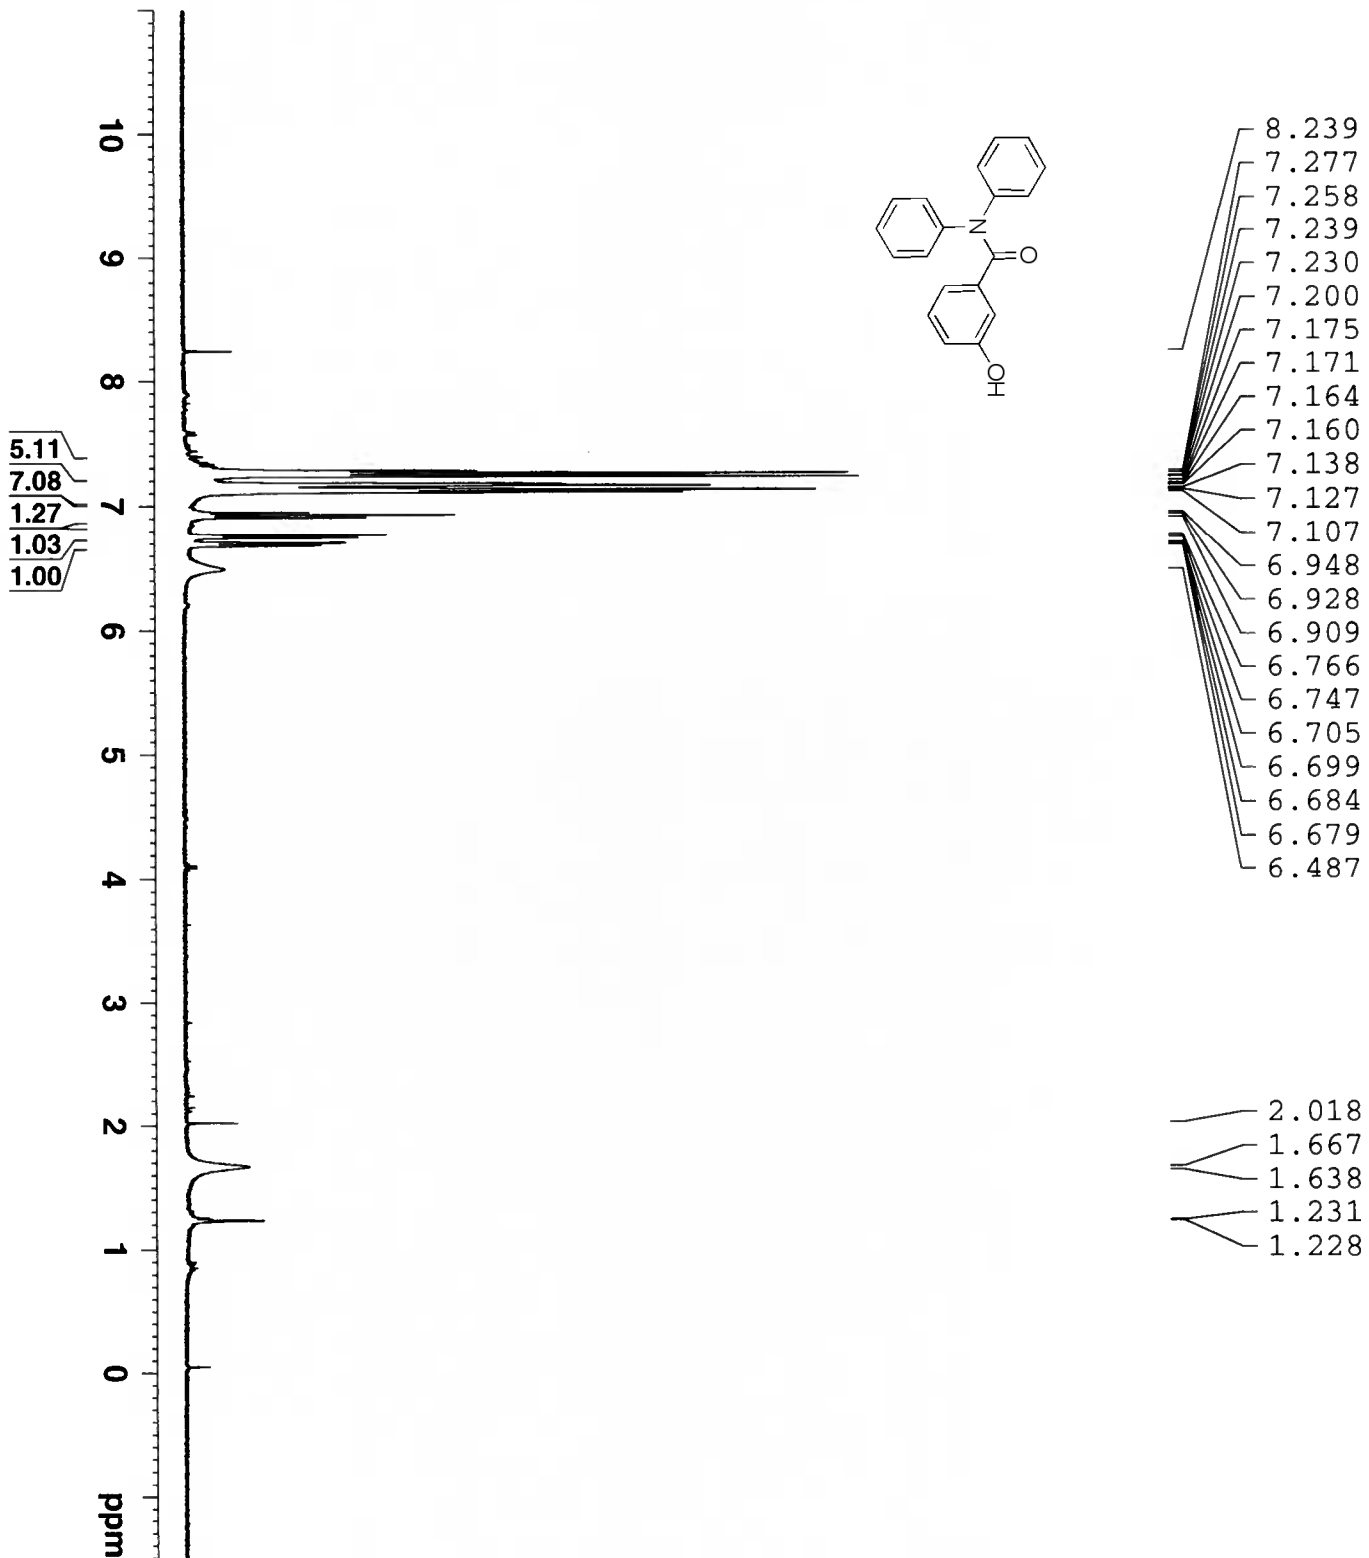

- 8.239
- 7.277
- 7.258
- 7.239
- 7.230
- 7.200
- 7.175
- 7.171
- 7.164
- 7.160
- 7.138
- 7.127
- 7.107
- 6.948
- 6.928
- 6.909
- 6.766
- 6.747
- 6.705
- 6.699
- 6.684
- 6.679
- 6.487

- 2.018
- 1.667
- 1.638
- 1.231
- 1.228

Current Data Parameters  
 NAME jdh-3-288  
 EXPNO 1  
 PROCNO 1

F2 - Acquisition Parameters

Date\_ 20090520  
 Time 13.15  
 INSTRUM spect  
 PROBHD 5 mm BBO BB-1H  
 PULPROG zg30  
 TD 65536  
 SOLVENT CDCl3  
 NS 16  
 DS 2  
 SWH 8278.146  
 FIDRES 0.126314  
 AQ 3.9584243  
 RG 228.1  
 DE 60.400  
 TE 298.2  
 DI 1.00000000  
 TDO 1

==== CHANNEL f1 =====

NUC1 1H  
 P1 15.07  
 PL1 0.00  
 SFO1 400.1324710

F2 - Processing Parameters

SI 65536  
 SF 400.1300212  
 WDW no  
 SSB 0  
 LB 0.00  
 GB 0  
 PC 1.00

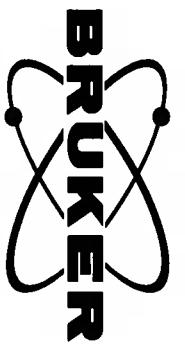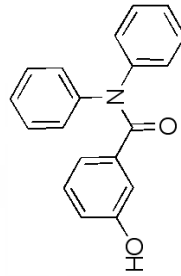

156.17  
143.56  
136.79  
129.13  
128.83  
127.39  
126.59  
120.78  
117.79  
116.45

77.32  
77.20  
77.00  
76.68

200 180 160 140 120 100 80 60 40 20 0 ppm

Current Data Parameters  
NAME jdh-3-288-cl3  
EXPNO 1  
PROCNO 1

F2 - Acquisition Parameters

Date\_ 20090520  
Time 13.52  
INSTRUM spect  
PROBHD 5 mm BBO BB-1H  
PULPROG zgpg30  
TD 65536  
SOLVENT CDCl3  
NS 601  
DS 2  
SWH 23980.814 Hz  
FIDRES 0.365918 Hz  
AQ 1.3664756 sec  
RG 18390.4  
DW 20.850 usec  
DE 6.00 usec  
TE 298.2 K  
D1 2.00000000 sec  
d11 0.03000000 sec  
DELTA 1.89999998 sec  
TD0 1

==== CHANNEL f1 =====  
NUC1 13C  
P1 8.75 usec  
PL1 -3.00 dB  
SFO1 100.6228298 MHz

==== CHANNEL f2 =====  
CPDPRG2 waltz16  
NUC2 1H  
PCPD2 90.00 usec  
PL2 -1.00 dB  
PL12 14.52 dB  
PL13 18.00 dB  
SFO2 400.1316005 MHz

F2 - Processing parameters  
SI 65536  
SF 100.612725 MHz  
WDW no  
SSB 0  
LB 0.00 Hz  
GB 0  
PC 1.40



- 7.562
- 7.540
- 7.233
- 7.220
- 7.199
- 7.140
- 7.120
- 7.100
- 7.018
- 7.011
- 7.008
- 6.952
- 6.948
- 6.946
- 6.933
- 6.929
- 6.927
- 6.892
- 6.890
- 6.886
- 6.883
- 6.872
- 6.869
- 6.865
- 6.863
- 3.681
- 3.651
- 3.628

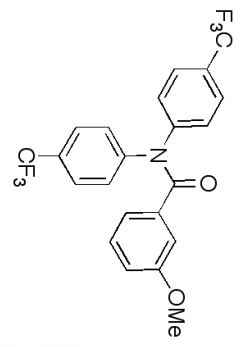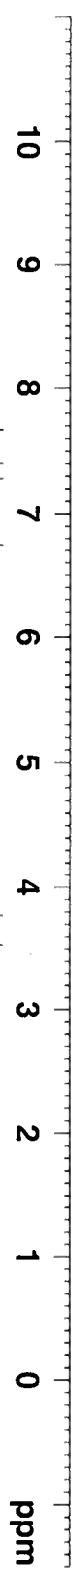

Current Data Parameters  
 Name jdh-3-265b  
 ExpNO 1  
 ProcNO 1

F2 - Acquisition Parameters

Date\_ 20090420  
 Time 11.10  
 INSTRUM spect  
 PROBHD 5 mm BBO BB-1H  
 PULPROG zg30  
 TD 65536  
 SOLVENT CDCl3  
 NS 16  
 DS 2  
 SWH 8278.146  
 FIDRES 0.126314  
 AQ 3.9584243  
 RG 128  
 DW 60.400  
 DE 6.00  
 TE 286.2  
 D1 1.00000000  
 TD0 1

==== CHANNEL f1 ====  
 NUC1 1H  
 P1 15.07  
 PL1 0.00  
 SFO1 400.1324710

F2 - Processing parameters  
 SI 65536  
 SF 400.1300212  
 WDW no  
 SSB 0  
 LB 0.00  
 GB 0  
 PC 1.00

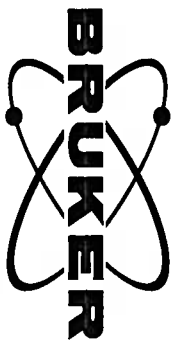

Current Data Parameters  
 NAME jdh-3-265b-cl3  
 EXPNO 1  
 PROCNO 1

F2 - Acquisition Parameters

Date\_ 20090420  
 Time 11.43  
 INSTRUM spect  
 PROBHD 5 mm BBO BB-1H  
 PULPROG zgpg30  
 TD 65536  
 SOLVENT CDCl3  
 NS 256  
 DS 2  
 SWH 23980.814 Hz  
 FIDRES 0.365918 Hz  
 AQ 1.3664756 sec  
 RG 11585.2  
 DW 20.850 usec  
 DE 6.00 usec  
 TE 290.2 K  
 D1 2.00000000 sec  
 d11 0.03000000 sec  
 DELTA 1.89999998 sec  
 TD0 1

==== CHANNEL f1 =====  
 NUC1 13C  
 P1 8.75 usec  
 PL1 -3.00 dB  
 SFO1 100.6228298 MHz

==== CHANNEL f2 =====  
 CPDPRG2 waltz16  
 NUC2 1H  
 PCPD2 90.00 usec  
 PL2 -1.00 dB  
 PL12 14.52 dB  
 PL13 18.00 dB  
 SFO2 400.1316005 MHz

F2 - Processing parameters  
 SI 65536  
 SF 100.6127816 MHz  
 MDW no  
 SSB 0  
 LB 0.00 Hz  
 GB 0  
 PC 1.40

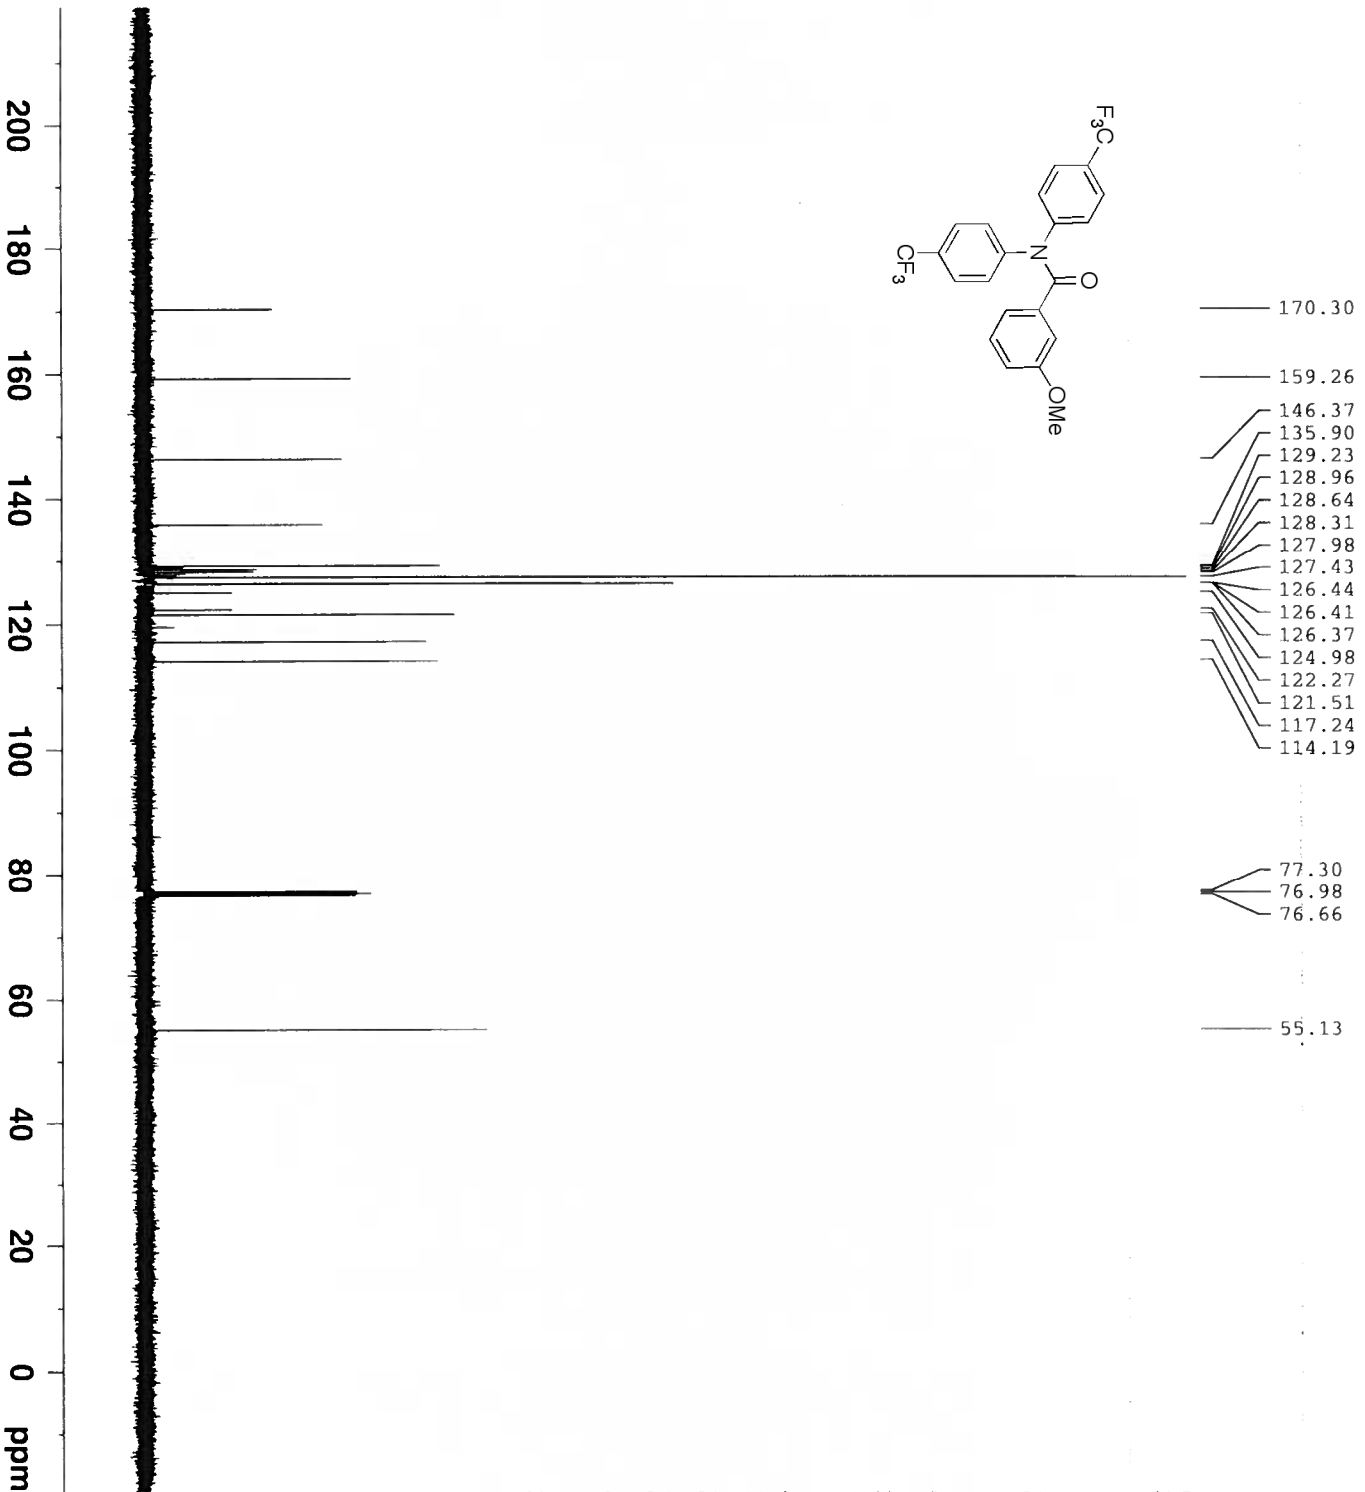

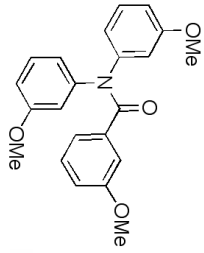

- 7.232
- 7.179
- 7.159
- 7.139
- 7.108
- 7.088
- 7.067
- 7.019
- 7.002
- 6.823
- 6.820
- 6.805
- 6.802
- 6.714
- 6.702
- 6.696
- 6.679
- 3.679
- 3.656

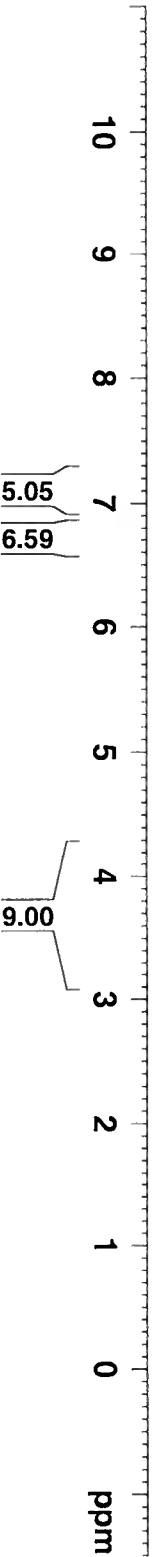

Current Data Parameters  
 Name jdh-3-265c  
 ExpNO 1  
 ProcNO 1

F2 - Acquisition Parameters

Date\_ 20090420  
 Time 11.15  
 INSTRUM spect  
 PROBHD 5 mm BBO BB-1H  
 PULPROG zg30  
 TD 65536  
 SOLVENT CDCl3  
 NS 16  
 DS 2  
 SWH 8278.146  
 FIDRES 0.126314  
 AQ 3.9584243  
 RG 64  
 DW 60.400  
 DE 6.00  
 TE 287.2  
 D1 1.00000000  
 TD0 1

==== CHANNEL F1 =====  
 NUC1 1H  
 P1 15.07  
 PL1 0.00  
 SFO1 400.1324710

F2 - Processing parameters  
 SI 65536  
 SF 400.1300212  
 WDW no  
 SSB 0  
 LB 0.00  
 GB 0  
 PC 1.00

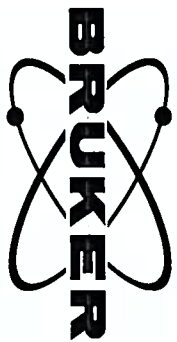

Current Data Parameters  
 NAME jdh-3-265c-c13  
 EXPNO 1  
 PROCNO 1

F2 - Acquisition Parameters

Date\_ 20090420  
 Time 11.52  
 INSTRUM spect  
 PROBHD 5 mm BBO BB-1H  
 PULPROG zgpg30  
 TD 65536  
 SOLVENT CDCl3  
 NS 115  
 DS 2  
 SWH 23980.814 Hz  
 FIDRES 0.365918 Hz  
 AQ 1.3664756 sec  
 RG 13004  
 DW 20.850 usec  
 DE 6.00 usec  
 TE 291.2 K  
 D1 2.0000000 sec  
 d11 0.0300000 sec  
 DELTA 1.89999998 sec  
 TD0 1

==== CHANNEL f1 =====  
 NUC1 13C  
 P1 8.75 usec  
 PL1 -3.00 dB  
 SFO1 100.6228298 MHz

==== CHANNEL f2 =====  
 CPDPRG2 waltz16  
 NUC2 1H  
 PCPD2 90.00 usec  
 PL2 -1.00 dB  
 PL12 14.52 dB  
 PL13 18.00 dB  
 SFO2 400.1316005 MHz

F2 - Processing parameters  
 SI 65536  
 SF 100.6127919 MHz  
 WDW no  
 SSB 0  
 LB 0.00 Hz  
 GB 0  
 PC 1.40

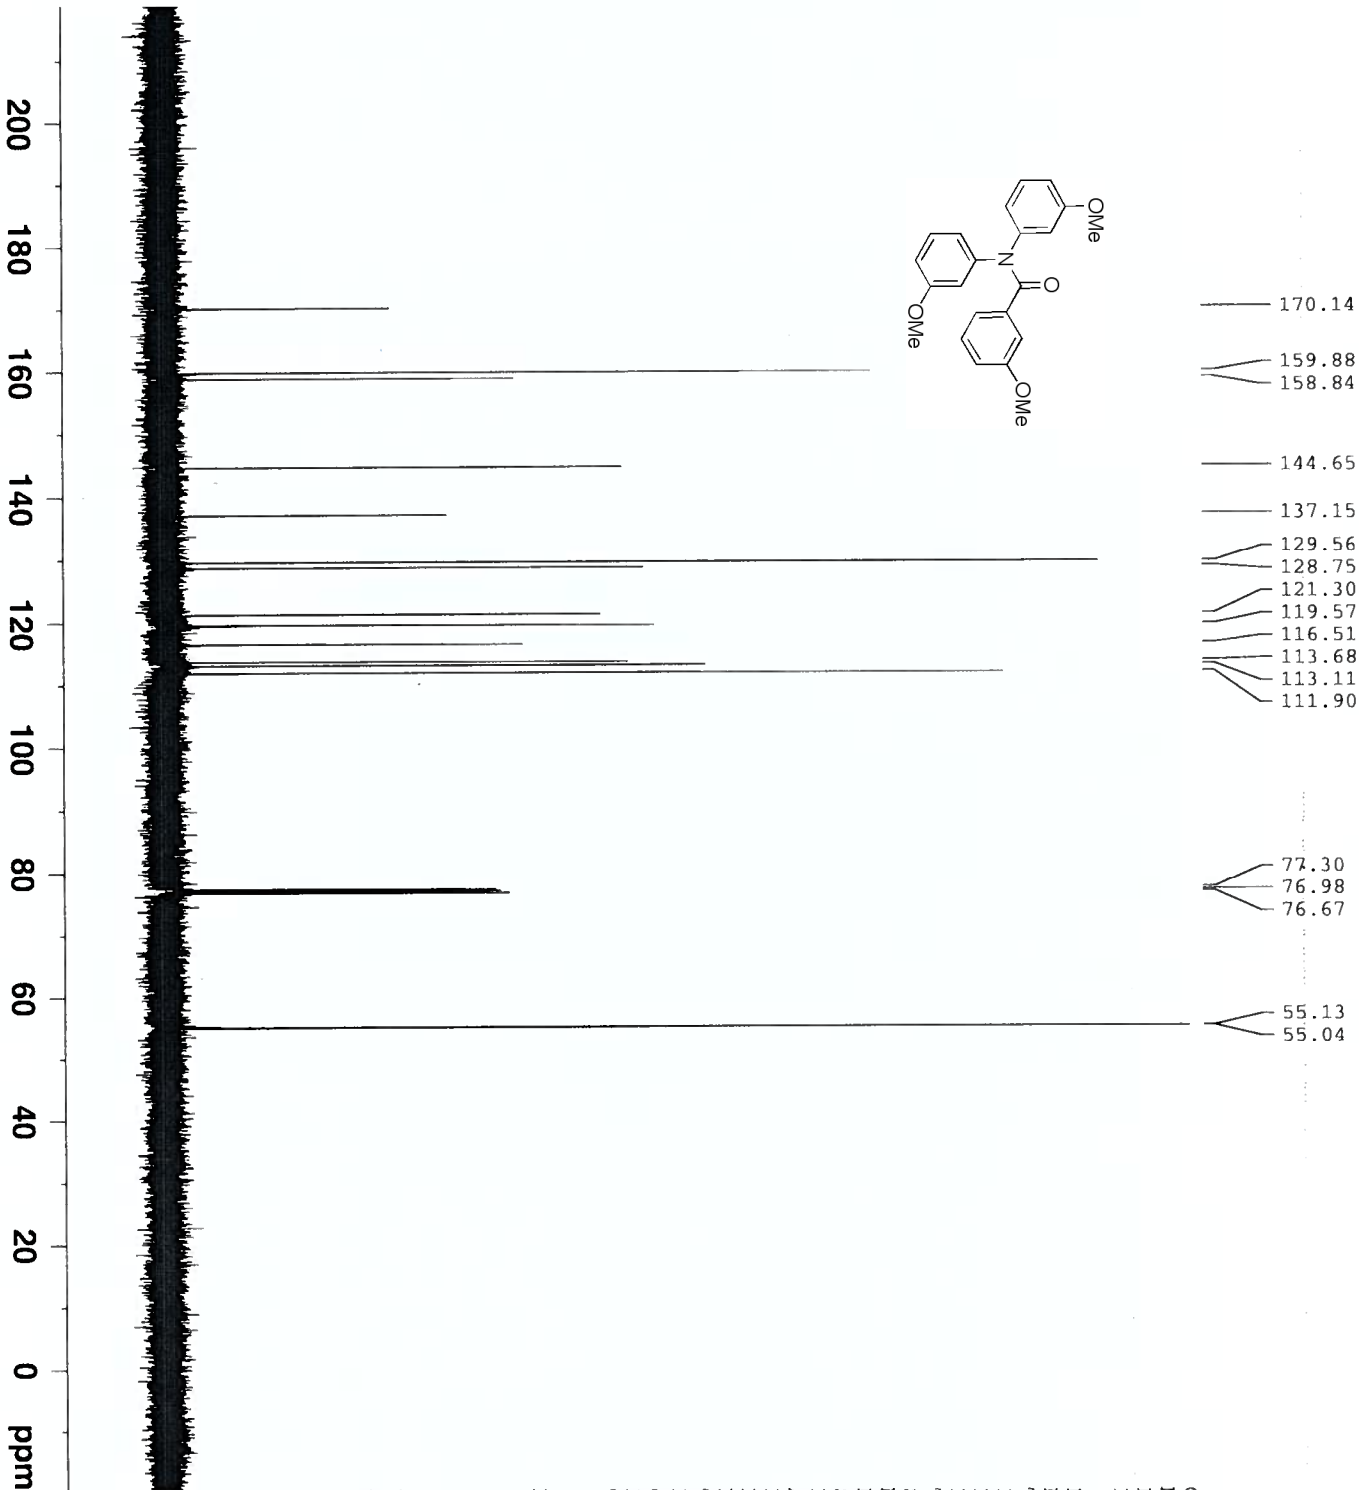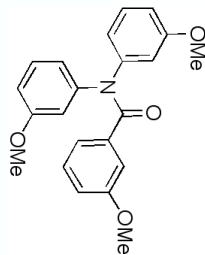

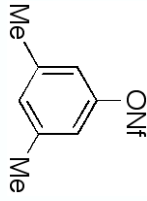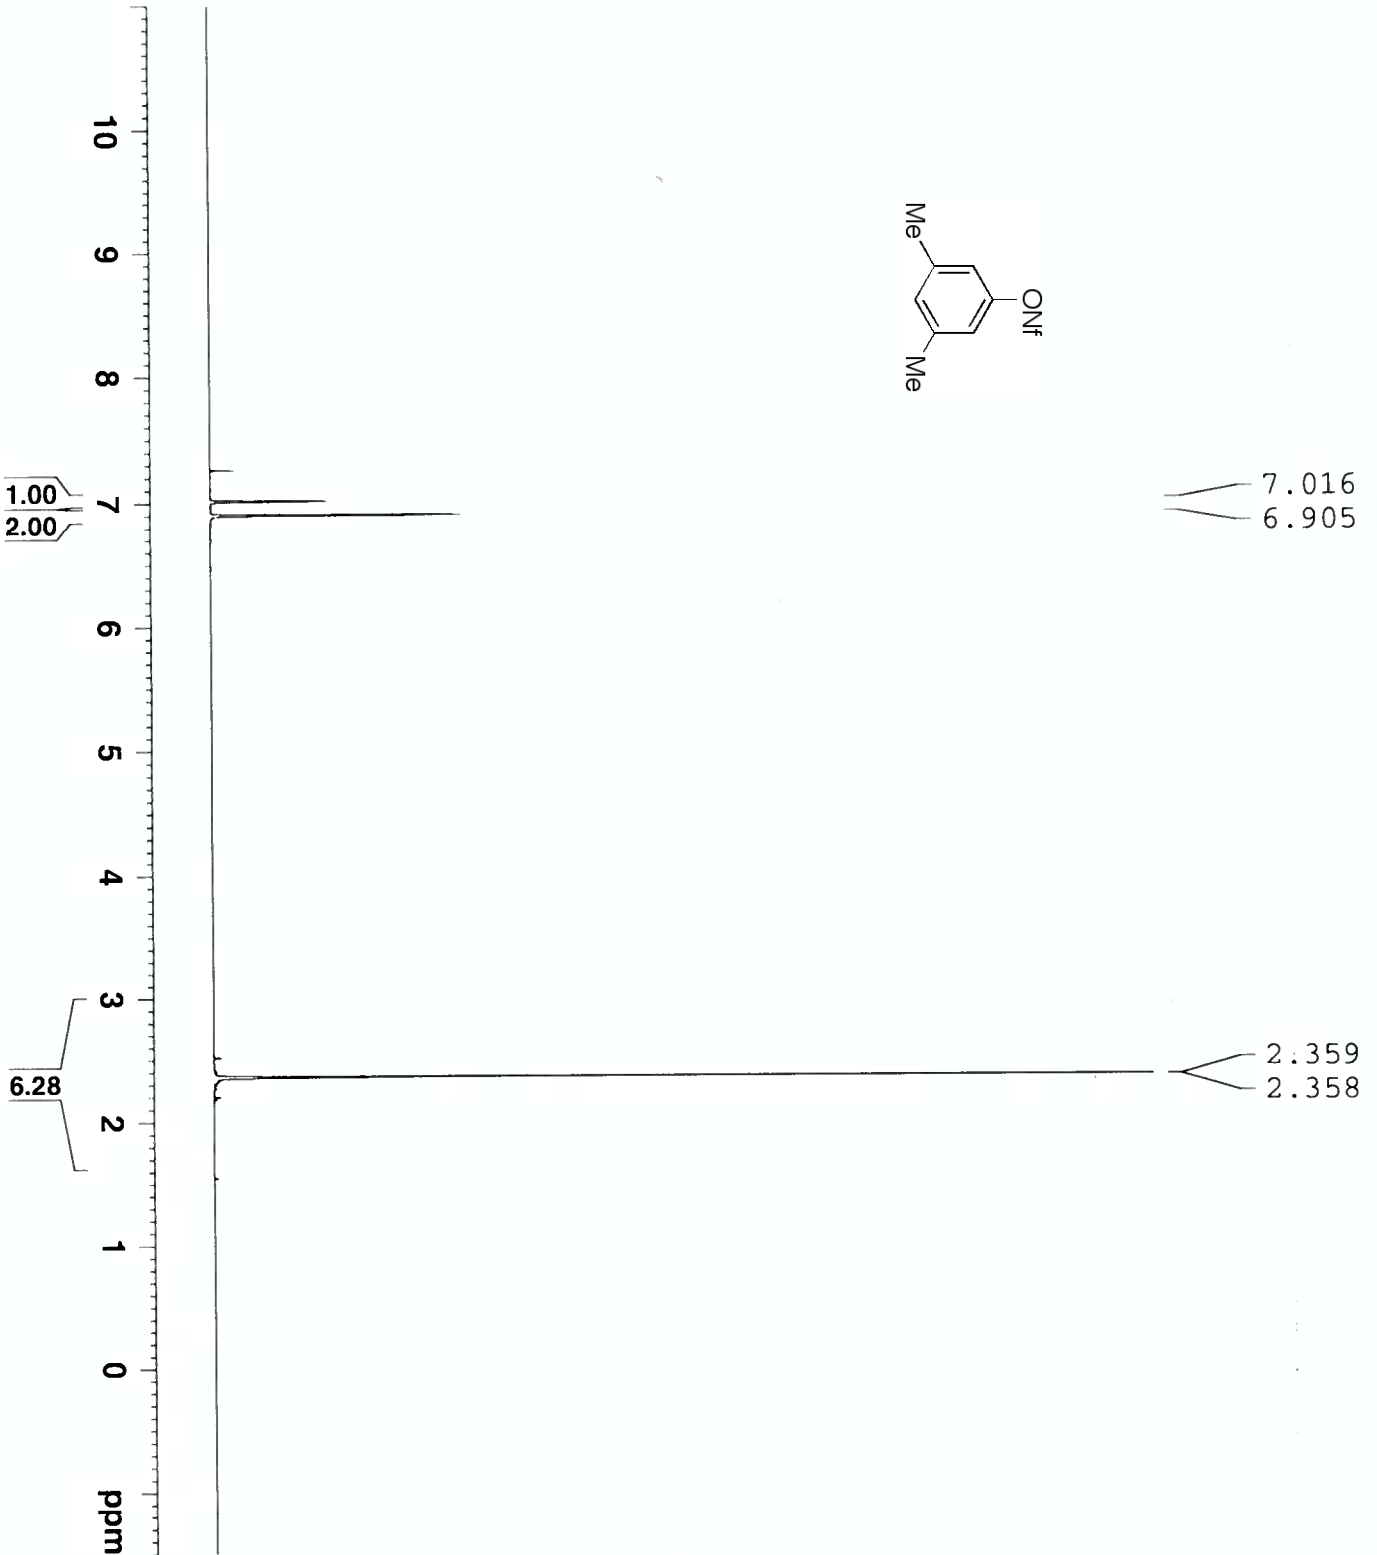

Current Data Parameters  
 Name jdh-1-282  
 ExpNO 1  
 ProcNO 1

F2 - Acquisition Parameters

Date\_ 20090408  
 Time 19.02  
 INSTRUM spect  
 PROBHD 5 mm BBO BB-1H  
 PULPROG zg30  
 TD 65536  
 SOLVENT CDCl3  
 NS 16  
 DS 2  
 SWH 8278.146  
 FIDRES 0.126314  
 AQ 3.9584243  
 RG 64  
 DW 60.400  
 DE 6.00  
 TE 293.2  
 D1 1.00000000  
 TD0 1

==== CHANNEL f1 ====

NUC1 1H  
 P1 15.07  
 PL1 0.00  
 SFO1 400.1324710

F2 - Processing Parameters

SI 65536  
 SF 400.1300096  
 WDW no  
 SSB 0  
 LB 0.00  
 GB 0  
 PC 1.00

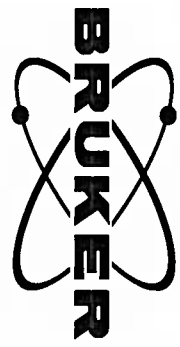

Current Data Parameters  
 NAME jdh-1-282-c13  
 EXPNO 1  
 PROCNO 1

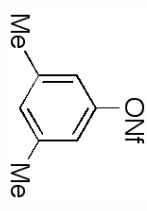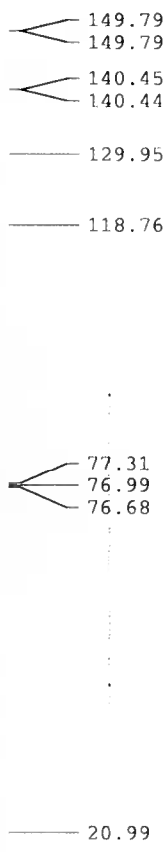

F2 - Acquisition Parameters

Date\_ 20090408  
 Time 19.09  
 INSTRUM spect  
 PROBHID 5 mm BBO BB-1H  
 PULPROG zgpg30  
 TD 65536  
 SOLVENT CDCl3  
 NS 64  
 DS 2  
 SWH 23980.814 Hz  
 FIDRES 0.365918 Hz  
 AQ 1.3664756 sec  
 RG 8192  
 DW 20.850 usec  
 DE 6.00 usec  
 TE 293.2 K  
 D1 2.0000000 sec  
 d11 0.0300000 sec  
 DELTA 1.89999998 sec  
 TD0 1

==== CHANNEL F1 =====

NUC1 13C  
 P1 8.75 usec  
 PL1 -3.00 dB  
 SFO1 100.6228298 MHz

==== CHANNEL F2 =====

CPDPRG2 waltz16  
 NUC2 1H  
 PCPD2 90.00 usec  
 PL2 -1.00 dB  
 PL12 14.52 dB  
 PL13 18.00 dB  
 SFO2 400.1316005 MHz

F2 - Processing parameters

SI 65536  
 SF 100.6127655 MHz  
 WDW no  
 SSB 0  
 LB 0.00 Hz  
 GB 0  
 PC 1.40

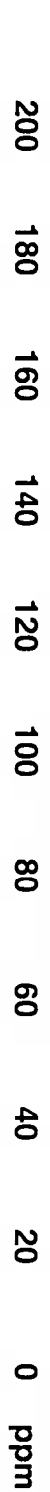

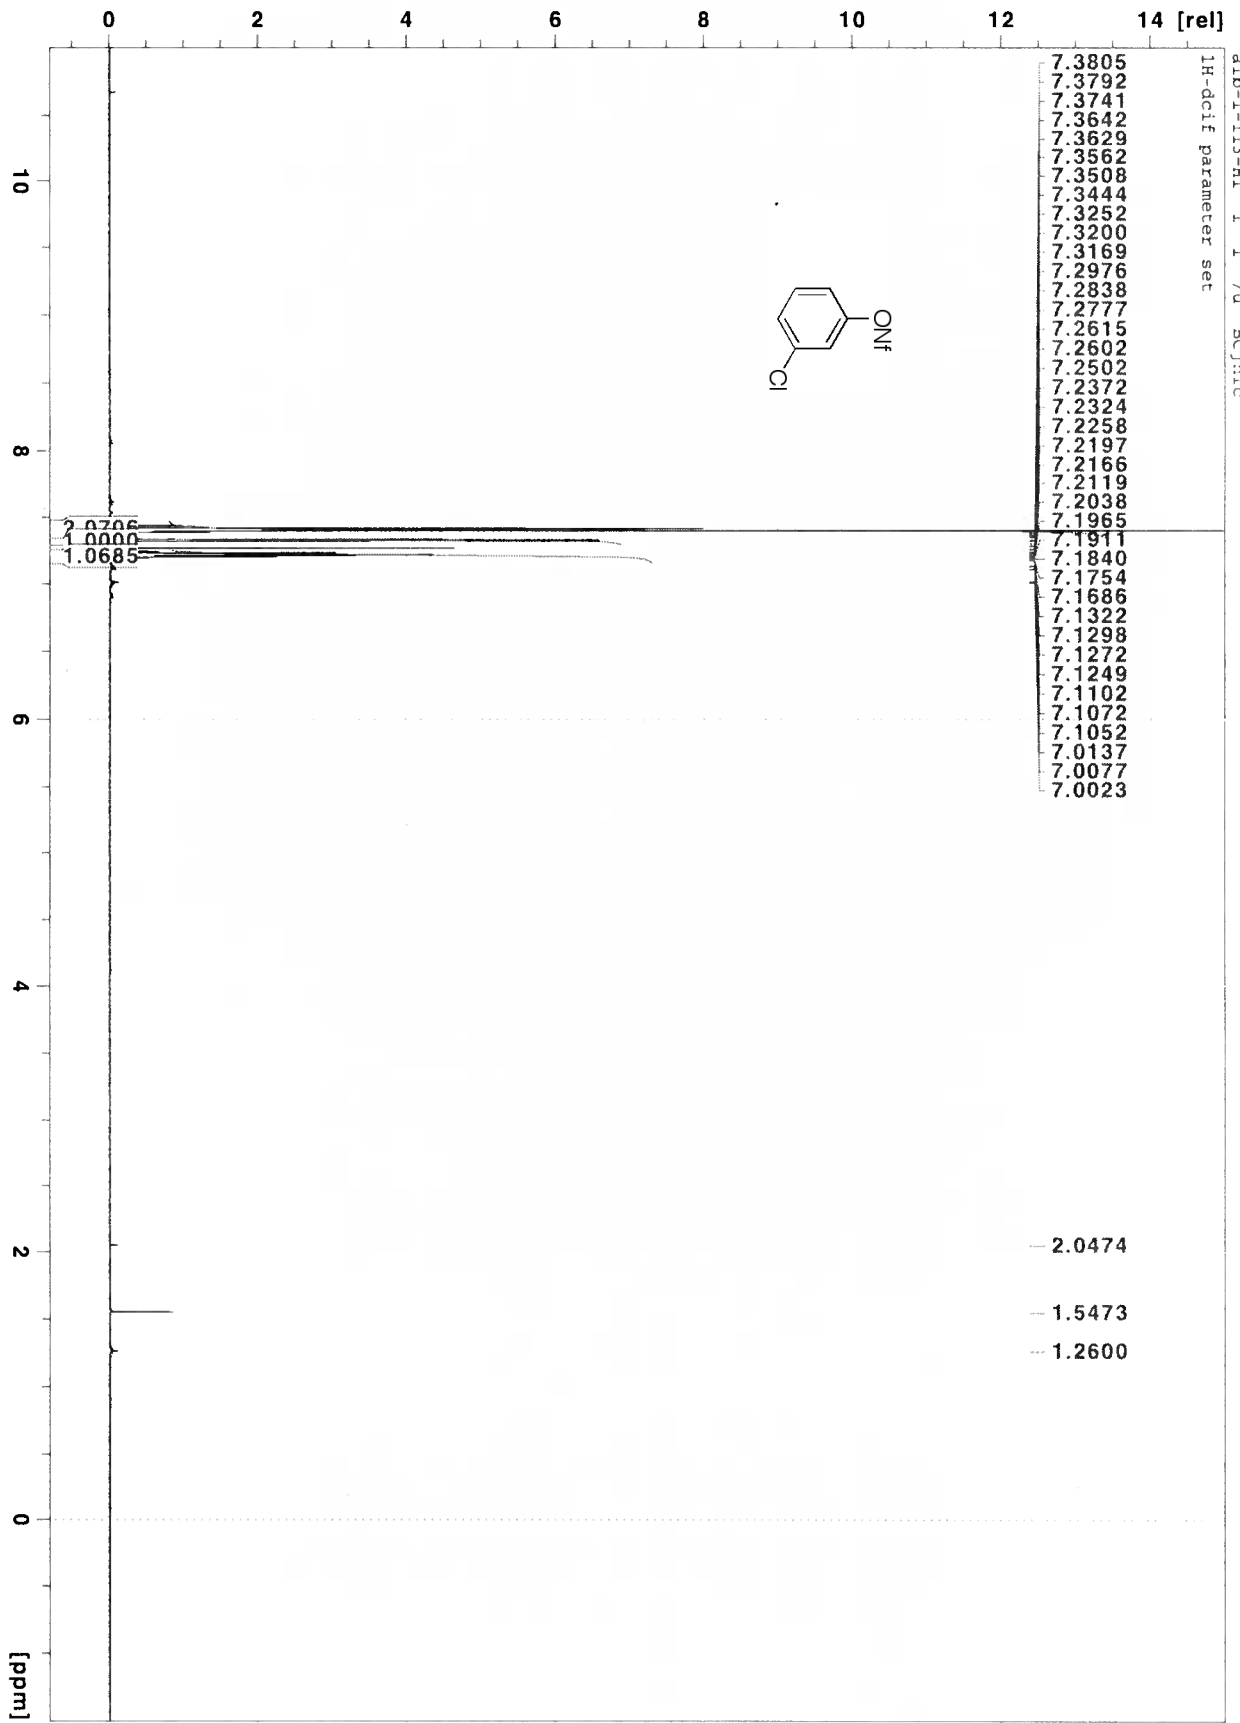

Current Data Parameters  
 NAME jdh-3-45-H1  
 EXPNO 1  
 PROCNO 1

F2 - Acquisition Parameters

Date\_ 20090408  
 Time 18.32  
 INSTRUM spect  
 PROBHD 5 mm BBO BB-1H  
 PULPROG zg30  
 TD 65536  
 SOLVENT CDCl3  
 NS 16  
 DS 2

SWH 8278.146  
 FIDRES 0.126314  
 AQ 3.9584243  
 RG 362  
 DW 60.400  
 DE 6.00  
 TE 293.2  
 D1 1.00000000  
 TD0 1

==== CHANNEL F1 =====  
 NUC1 1H  
 P1 15.07  
 PL1 0.00  
 SFO1 400.1324710

F2 - Processing parameters  
 SI 65536  
 SF 400.1300096  
 WDW no  
 SSB 0  
 LB 0.00  
 GB 0  
 PC 1.00

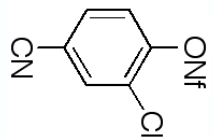

- 7.867
- 7.867
- 7.862
- 7.862
- 7.808
- 7.785
- 7.698
- 7.693
- 7.677
- 7.672
- 7.534
- 7.533
- 7.512
- 7.511
- 7.449
- 7.426
- 7.260

1.553

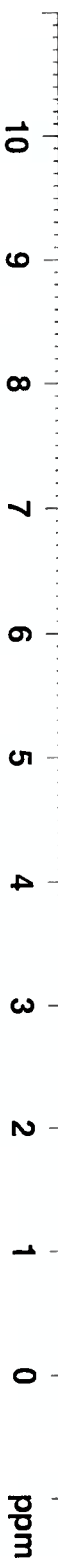

1.00  
 1.07  
 1.06



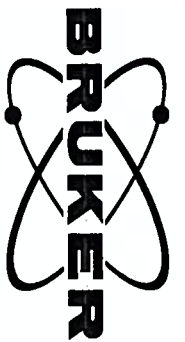

Current Data Parameters  
 NAME jdh-3-48-C13-2  
 EXPNO 1  
 PROCNO 1

F2 - Acquisition Parameters  
 Date\_ 20090408  
 Time 18.45

INSTRUM spect  
 PROBHD 5 mm BBO BB-1H  
 PULPROG zgpg30  
 TD 65536  
 SOLVENT CDCl3  
 NS 128  
 DS 2

SWH 23980.814 Hz  
 FIDRES 0.365918 Hz  
 AQ 1.3664756 sec  
 RG 10321.3  
 DW 20.850 usec  
 DE 6.00 usec  
 TE 293.2 K

D1 2.00000000 sec  
 d11 0.03000000 sec  
 DELTA 1.89999998 sec  
 TD0 1

==== CHANNEL f1 =====  
 NUC1 13C  
 P1 8.75 usec  
 PL1 -3.00 dB  
 SFO1 100.6228298 MHz

==== CHANNEL f2 =====  
 CPDPRG2 waltz16  
 NUC2 1H  
 PCPD2 90.00 usec  
 PL2 -1.00 dB  
 PL12 14.52 dB  
 PL13 18.00 dB  
 SFO2 400.1316005 MHz

F2 - Processing parameters  
 SI 65536  
 SF 100.6127711 MHz  
 WDM no  
 SSB 0  
 LB 0.00 Hz  
 GB 0  
 PC 1.40

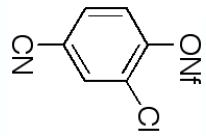

148.74  
 134.88  
 134.47  
 132.25  
 128.95  
 124.08  
 124.07  
 124.06  
 122.58  
 116.00  
 113.69  
 77.33  
 77.01  
 76.69

200 180 160 140 120 100 80 60 40 20 0 ppm

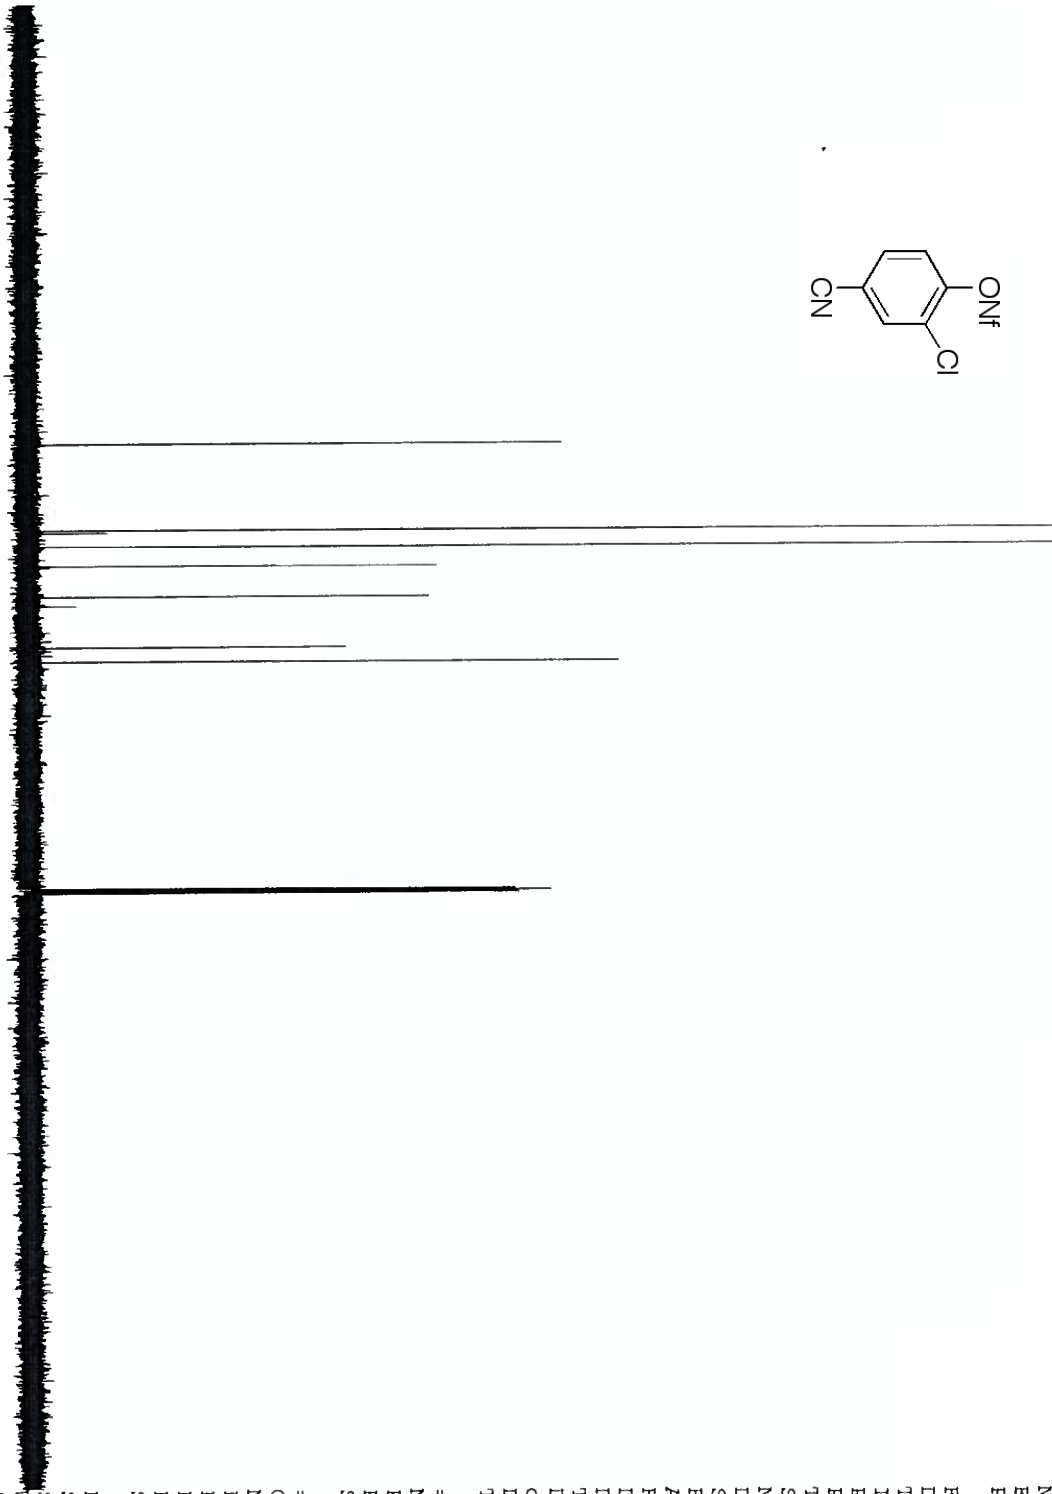

7.260  
5.729  
3.265  
3.251  
3.248  
3.233  
3.229  
3.215  
1.507  
1.503  
1.488  
1.471  
1.451  
1.344  
1.332  
1.324  
1.321  
1.313  
1.304  
1.301  
1.293  
1.290  
1.284  
1.281  
1.255  
0.959  
0.948  
0.941  
0.937  
0.932  
0.930  
0.921  
0.888  
0.883  
0.876  
0.871  
0.854  
0.720  
0.719  
0.716  
0.710  
0.703  
0.700  
0.691  
0.683  
0.673

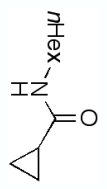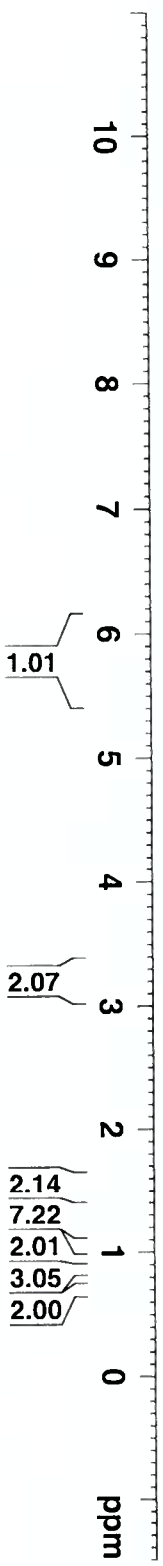

Current Data Parameters  
NAME jdh-1-291  
EXPNO 1  
PROCNO 1

F2 - Acquisition Parameters

Date\_ 20090408  
Time 14.54  
INSTRUM spect  
PROBHD 5 mm BBO BB-1H  
PULPROG zg30  
TD 65536  
SOLVENT CDCl3  
NS 16  
DS 2  
SWH 8278.146  
FIDRES 0.126314  
AQ 3.9584243  
RG 128  
DW 60.400  
DE 6.00  
TE 293.2  
D1 1.00000000  
TD0 1  
S

==== CHANNEL f1 =====  
NUC1 1H  
P1 15.07  
PL1 0.00  
SFO1 400.1324710

F2 - Processing parameters  
SI 65536  
SF 400.1300093  
WDW no  
SSB 0  
LB 0.00  
GB 0  
PC 1.00

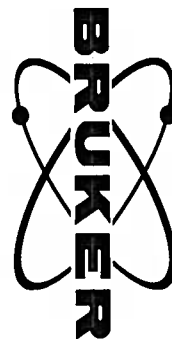

Current Data Parameters  
 NAME jdh-1-291-c13  
 EXPNO 1  
 PROCNO 1

F2 - Acquisition Parameters  
 Date\_ 20090408  
 Time 15.11

INSTRUM spect  
 PROBHD 5 mm BBO 3B-1H  
 PULPROG zgpg30  
 TD 65536  
 SOLVENT CDCl3  
 NS 128

DS 2  
 SMH 23980.814 Hz  
 FIDRES 0.365918 Hz  
 AQ 1.3664756 sec

DW 20.850 usec  
 DE 6.00 usec  
 TE 293.2 K  
 D1 2.00000000 sec  
 d11 0.03000000 sec  
 DELTA 1.89999998 sec  
 TD0 1

==== CHANNEL f1 =====  
 NUC1 13C  
 P1 8.75 usec  
 PL1 -3.00 dB  
 SFO1 100.6228298 MHz

==== CHANNEL f2 =====  
 CPDPRG2 waltz16  
 NUC2 1H  
 PCPD2 90.00 usec  
 PL2 -1.00 dB  
 PL12 14.52 dB  
 PL13 18.00 dB  
 SFO2 400.1316005 MHz

F2 - Processing parameters  
 SI 65536  
 SF 100.6127773 MHz  
 WDW no  
 SSB 0  
 LB 0.00 Hz  
 GB 0  
 PC 1.40

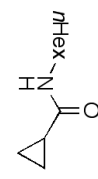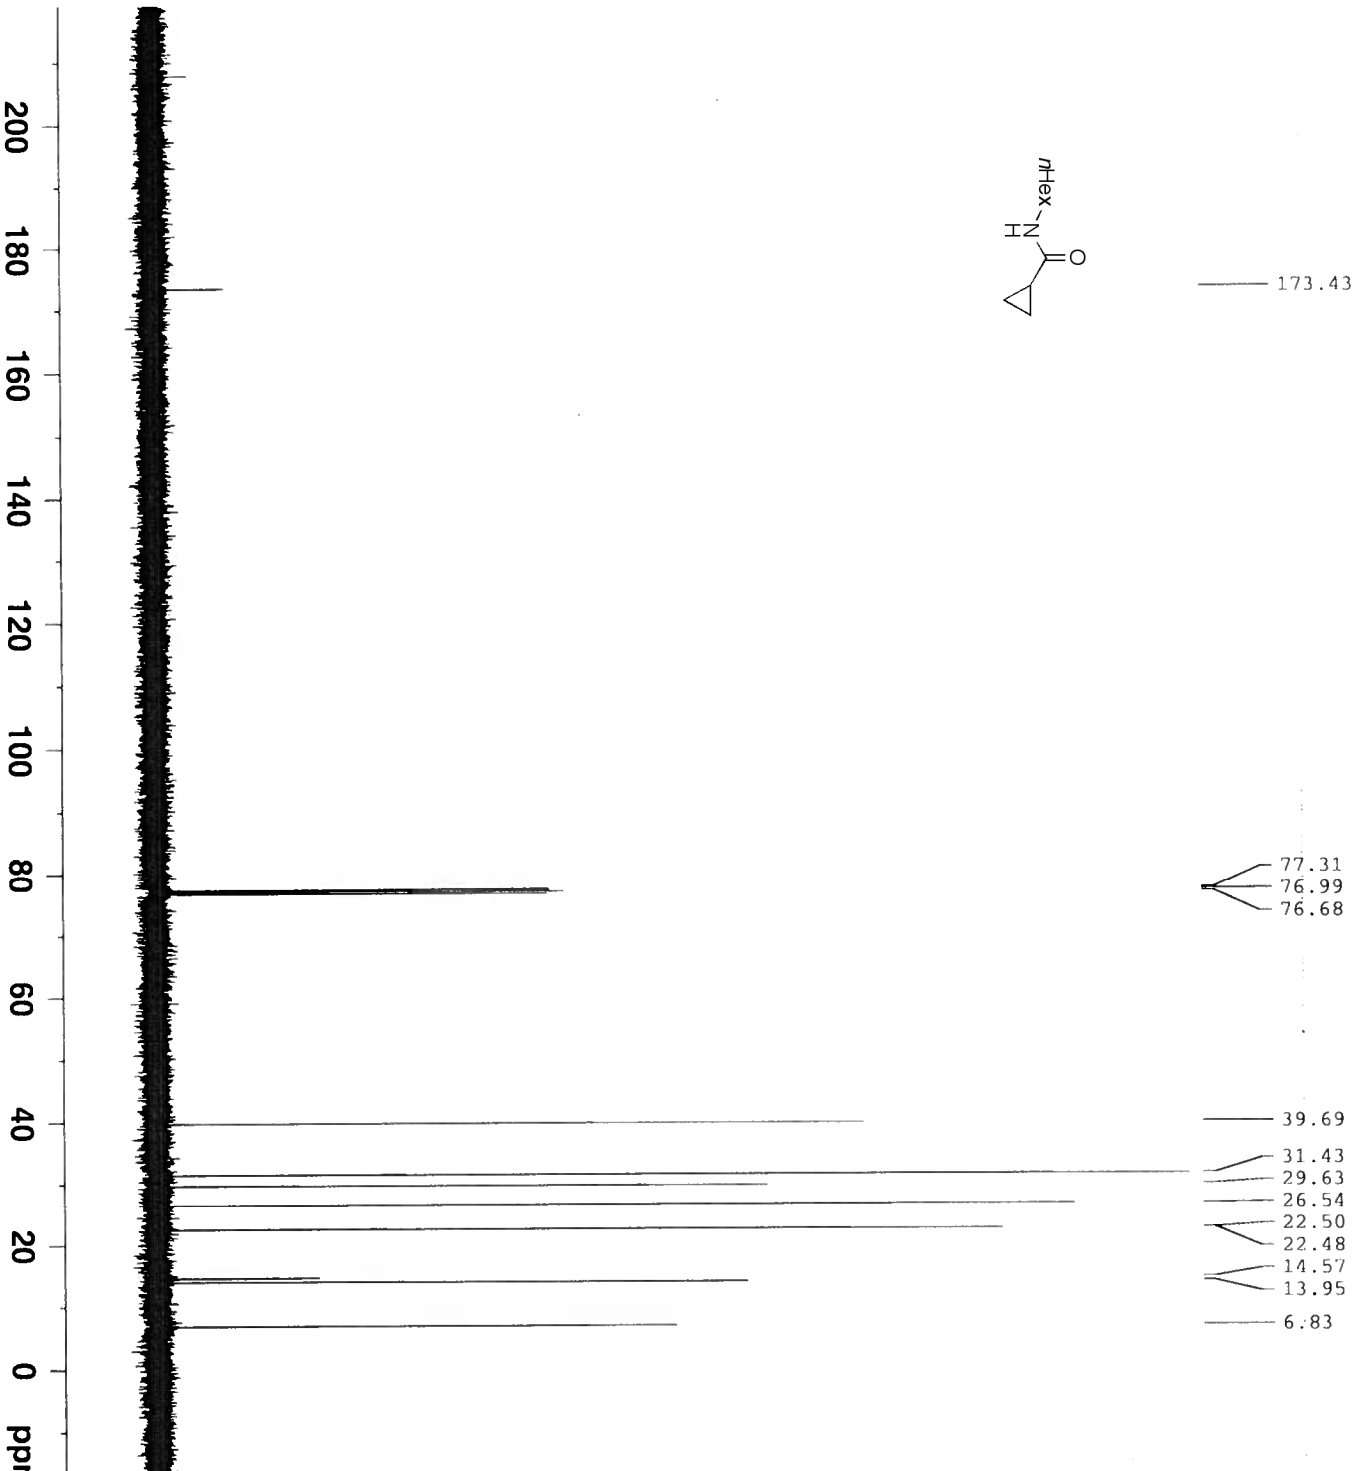

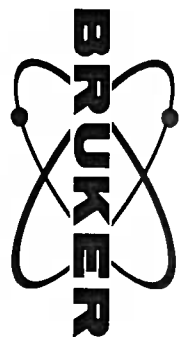

Current Data Parameters  
 NAME alb-1-48  
 EXPNO 1  
 PROCNO 1

F2 - Acquisition Parameters  
 Date\_ 20090408  
 Time 14.33  
 INSTRUM spect  
 PROBHD 5 mm QNP 1H/13  
 PULPROG zg30  
 TD 65536  
 SOLVENT CDCl3  
 NS 16  
 DS 2  
 SWH 8278.146 Hz  
 FIDRES 0.126314 Hz  
 AQ 3.9584243 sec  
 RG 203.2  
 DW 60.400 usec  
 DE 6.00 usec  
 TE 291.2 K  
 D1 1.00000000 sec  
 TD0 1

==== CHANNEL f1 =====  
 NUC1 1H  
 P1 13.88 usec  
 PL1 0.00 dB  
 SF01 400.1324710 MHz  
 F2 - Processing parameters  
 SI 65536  
 SF 400.1300220 MHz  
 WDW no  
 SSB 0  
 LB 0.00 Hz  
 GB 0  
 PC 1.00

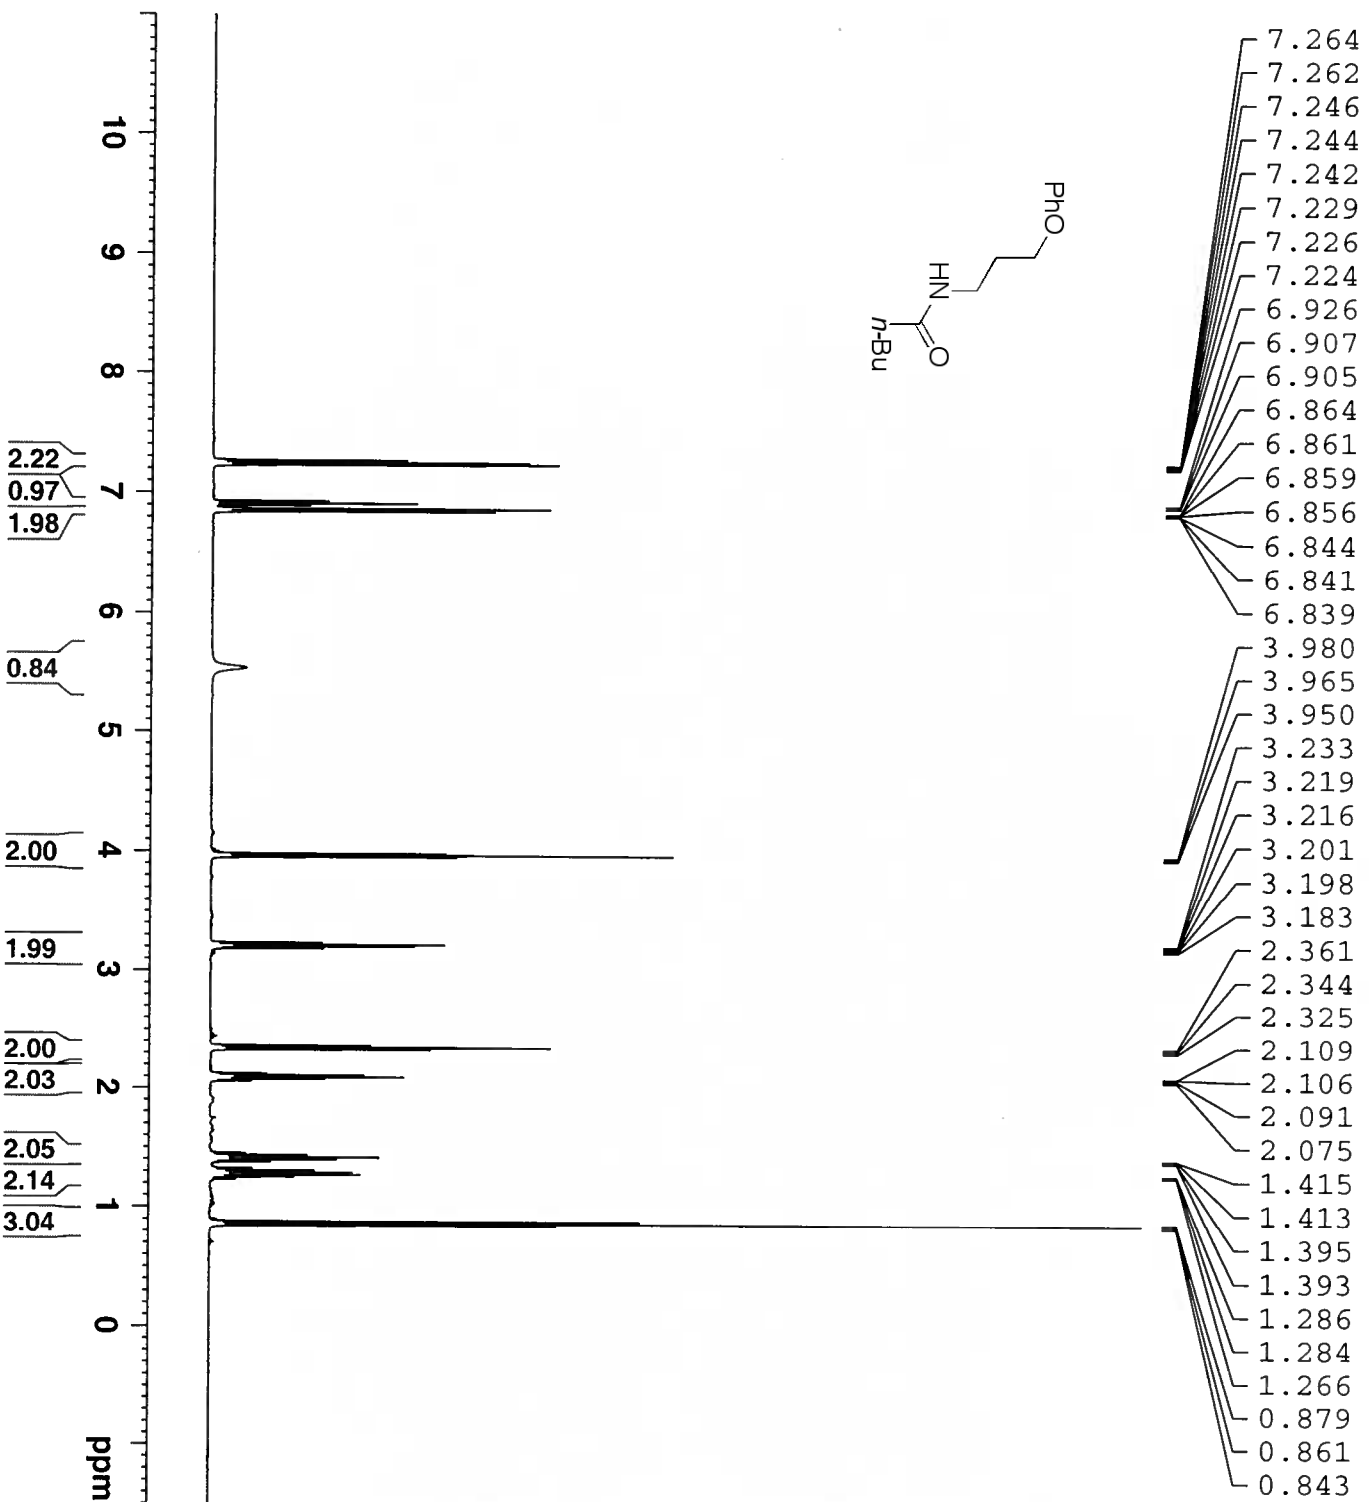

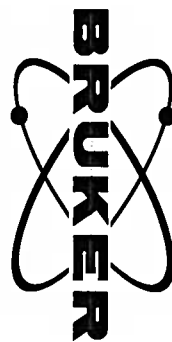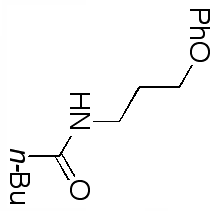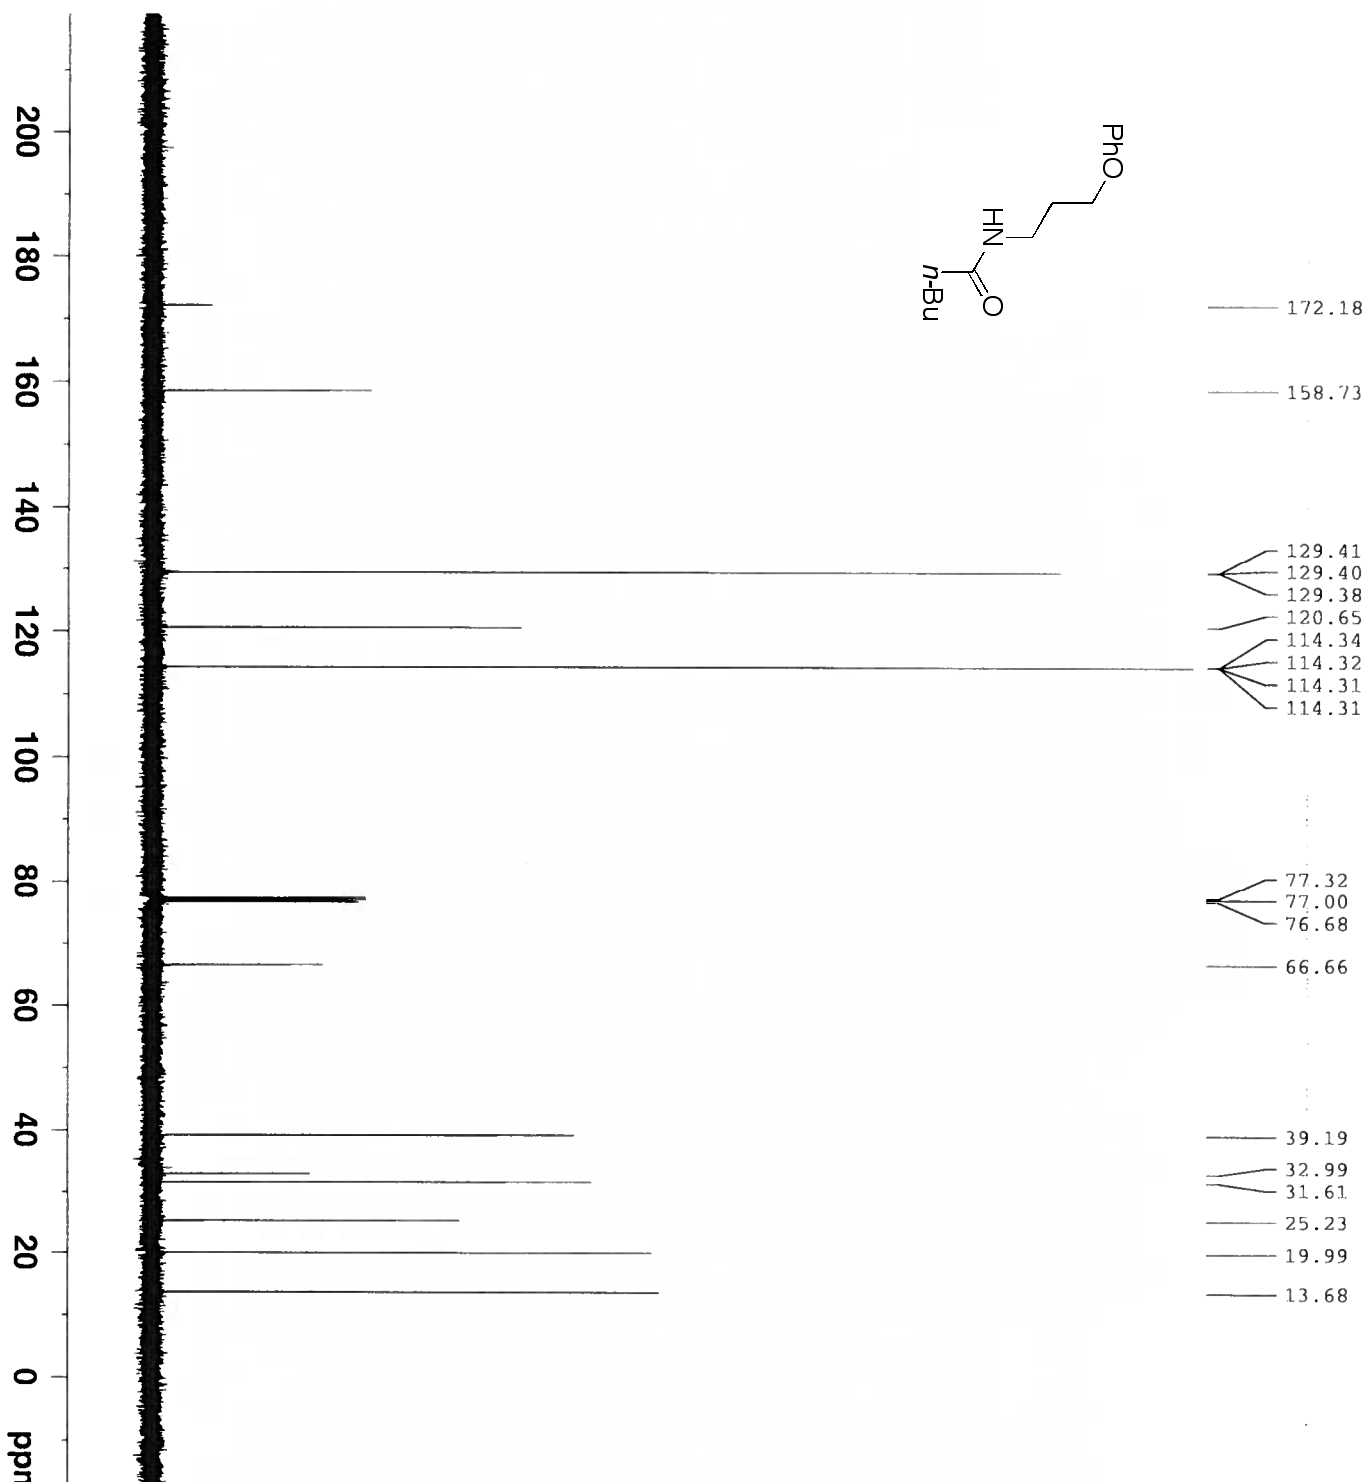

Current Data Parameters  
 NAME alb-1-48-c13  
 EXPNO 1  
 PROCNO 1

F2 - Acquisition Parameters  
 Date\_ 20090408  
 Time 15.30

INSTRUM spect  
 PROBHD BB-1H  
 PULPROG zgpg30  
 TD 65536  
 SOLVENT CDCl3  
 NS 128

DS 2  
 SMH 23980.814 Hz  
 FIDRES 0.365918 Hz  
 AQ 1.3664756 sec  
 RG 8192  
 DW 20.850 usec  
 DE 6.00 usec  
 TE 293.2 K

D1 2.00000000 sec  
 d11 0.03000000 sec  
 DELTA 1.89999998 sec  
 TD0 1

==== CHANNEL f1 =====  
 NUC1 13C  
 P1 8.75 usec  
 PL1 -3.00 dB  
 SFO1 100.6228298 MHz

==== CHANNEL f2 =====  
 CPDPRG2 waltz16  
 NUC2 1H  
 PCPD2 90.00 usec  
 PL2 -1.00 dB  
 PL12 14.52 dB  
 PL13 18.00 dB  
 SFO2 400.1316005 MHz

F2 - Processing parameters  
 SI 65536  
 SF 100.6127785 MHz  
 WDW no  
 SSB 0  
 LB 0.00 Hz  
 GB 0  
 PC 1.40

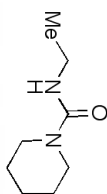

7.259

3.307  
3.293  
3.285  
3.281  
3.272  
3.267  
3.253  
3.249  
3.235  
3.231  
3.217  
2.156  
1.594  
1.586  
1.582  
1.574  
1.571  
1.565  
1.562  
1.550  
1.541  
1.537  
1.532  
1.523  
1.514  
1.497  
1.138  
1.129

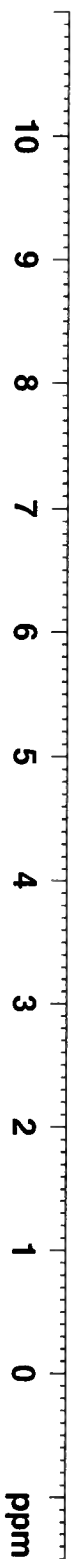

Current Data Parameters  
 NAME jdh-2-31-h1  
 EXPNO 1  
 PROCNO 1

F2 - Acquisition Parameters  
 Date\_ 20090514  
 Time 20.07  
 INSTRUM spect  
 PROBHD 5 mm BBO BB-1H  
 PULPROG zg30  
 TD 65536  
 SOLVENT CDCl3  
 NS 16  
 DS 2  
 SWH 8278.146  
 FIDRES 0.126314  
 AQ 3.9584243  
 RG 128  
 DE 60.400  
 TE 6.00  
 DI 298.2  
 TDO 1.0000000  
 TD0 1-1  
 S

==== CHANNEL f1 ====  
 NUC1 1H  
 P1 15.07  
 PL1 0.00  
 SF01 400.1324710

F2 - Processing parameters  
 SI 65536  
 SF 400.1300092  
 WDW no  
 SSB 0  
 LB 0.00  
 GB 0  
 PC 1.00

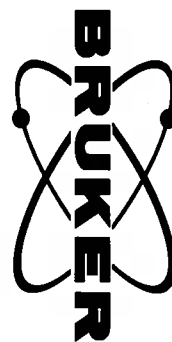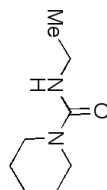

157.71

77.32  
77.01  
76.69

44.70

35.57

25.53  
25.52  
24.35

15.53

Current Data Parameters  
NAME jdh-2-31-C13  
EXPNO 1  
PROCNO 1

F2 - Acquisition Parameters  
Date\_ 20090514  
Time 20.27

INSTRUM spect  
PROBHD 5 mm BBO BB-1H  
PULPROG zgpg30  
TD 65536  
SOLVENT CDCl3  
NS 129  
DS 2

SWH 23980.814 Hz  
FIDRES 0.365918 Hz  
AQ 1.3664756 sec  
RG 8192  
DW 20.850 usec  
DE 6.00 usec

TE 298.2 K  
D1 2.00000000 sec  
d11 0.03000000 sec  
DELTA 1.89999998 sec  
TD0 1

==== CHANNEL f1 =====  
NUC1 13C  
P1 8.75 usec  
PL1 -3.00 dB  
SF01 100.6228298 MHz

==== CHANNEL f2 =====  
CPDPRG2 waltz16  
NUC2 1H  
PCPD2 90.00 usec  
PL2 -1.00 dB  
PL12 14.52 dB  
PL13 18.00 dB  
SF02 400.1316005 MHz

F2 - Processing parameters  
SI 65536  
SF 100.6127766 MHz  
WDW no  
SSB 0  
LB 0.00 Hz  
GB 0  
PC 1.40

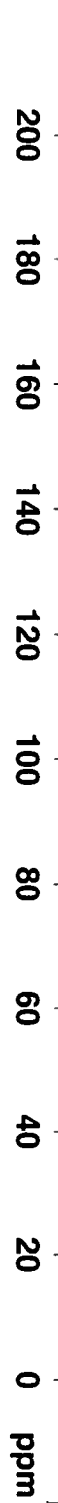

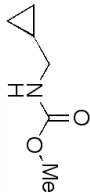

7.258

4.793  
3.705  
3.658  
3.047  
3.033  
3.018  
1.681  
0.982  
0.977  
0.970  
0.964  
0.963  
0.957  
0.953  
0.950  
0.945  
0.937  
0.933  
0.927  
0.919  
0.914  
0.908  
0.505  
0.495  
0.493  
0.490

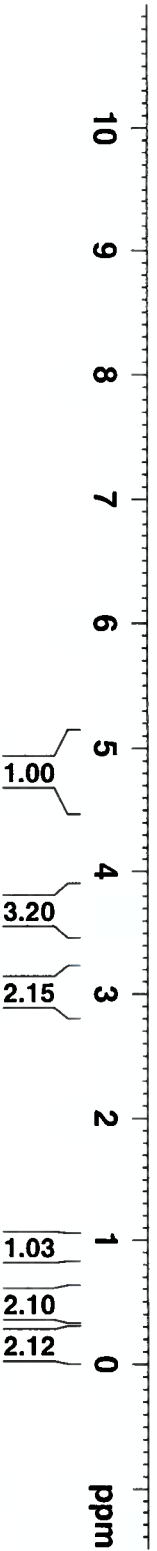

```

Current Data Parameters
NAME      alb-1-38-h1
EXPNO    1
PROCNO   1

F2 - Acquisition Parameters
Date_    20090514
Time     20.11
INSTRUM  spect
PROBHD   5 mm BBO BB-1H
PULPROG  zg30
TD       65536
SOLVENT  CDCl3
NS       16
DS       2
SWH      8278.146
FIDRES   0.126314
AQ       3.9584243
RG       128
DE       60.400
TE       298.2
D1       1.00000000
TD0      1
===== CHANNEL f1 =====
NUC1     1H
P1       15.07
PL1      0.00
SF01     400.1324710

F2 - Processing parameters
SI       65536
SF       400.1300098
WDW      no
SSB      0
LB       0.00
GB       0
PC       1.00
  
```



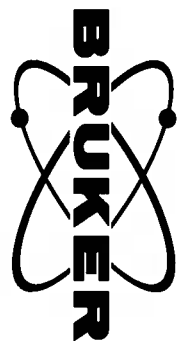

Current Data Parameters  
 NAME alb-1-38-C13  
 EXPNO 1  
 PROCNO 1

F2 - Acquisition Parameters  
 Date\_ 20090514  
 Time 20.38

INSTRUM spect  
 PROBHD 5 mm BBO BB-1H  
 PULPROG zgpg30  
 TD 65536  
 SOLVENT CDCl3  
 NS 128

DS 2  
 SWH 23980.814 Hz  
 FIDRES 0.365918 Hz  
 AQ 1.3664756 sec  
 RG 7298.2  
 DW 20.850 usec  
 DE 6.00 usec  
 TE 298.2 K

D1 2.00000000 sec  
 d11 0.03000000 sec  
 DELTA 1.89999998 sec  
 TD0 1

==== CHANNEL f1 =====  
 NUCl 13C  
 P1 8.75 usec  
 PL1 -3.00 dB  
 SF01 100.6228298 MHz

==== CHANNEL f2 =====  
 CPDPRG2 waltz16  
 NUCl 1H  
 PCPD2 90.00 usec  
 PL2 -1.00 dB  
 PL12 14.52 dB  
 PL13 18.00 dB  
 SF02 400.1316005 MHz

F2 - Processing parameters  
 SI 65536  
 SF 100.6127768 MHz  
 MDW no  
 SSB 0  
 LB 0.00 Hz  
 GB 0  
 PC 1.40

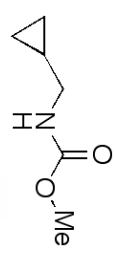

156.96  
 77.30  
 76.98  
 76.66  
 51.86  
 45.81  
 10.96  
 3.11  
 3.09

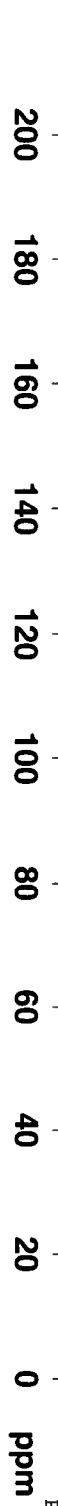

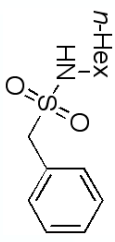

7.404  
 7.386  
 7.376  
 7.367  
 7.260

4.244  
 4.056  
 4.041  
 4.026  
 3.001  
 2.983  
 2.967  
 2.950  
 1.561  
 1.559  
 1.481  
 1.463  
 1.445  
 1.427  
 1.306  
 1.298  
 1.287  
 1.268  
 1.254  
 1.245  
 1.219  
 0.890  
 0.874  
 0.856

4.94  
 2.06  
 1.06  
 2.08  
 2.06  
 6.04  
 3.00

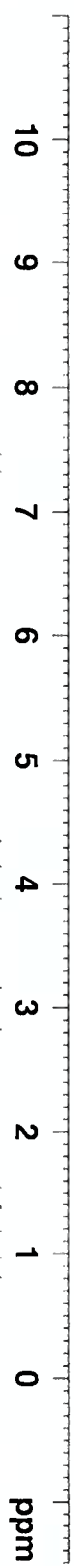

Current Data Parameters  
 Name jdh-1-299  
 ExpNO 1  
 ProcNO 1

F2 - Acquisition Parameters  
 Date\_ 20090408  
 Time 14.59  
 INSTRUM spect  
 PROBHD 5 mm BBO BB-1H  
 PULPROG zg30  
 TD 65536  
 SOLVENT CDCl3  
 NS 16  
 DS 2  
 SWH 8278.146  
 FIDRES 0.126314  
 AQ 3.9584243  
 RG 203.2  
 DW 60.400  
 DE 6.00  
 TE 293.2  
 D1 890  
 TD0 1.0000000  
 1-1  
 5

==== CHANNEL f1 ====  
 NUCL1 1H  
 P1 15.07  
 PL1 0.00  
 SF01 400.1324710

F2 - Processing parameters  
 SI 65536  
 SF 400.1300097  
 WDW no  
 SSB 0  
 LB 0.00  
 GB 0  
 PC 1.00

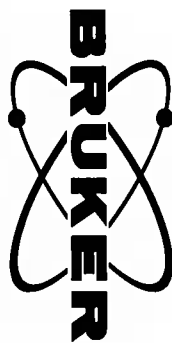

Current Data Parameters  
NAME alb-1-102  
EXPNO 1  
PROCNO 1

F2 - Acquisition Parameters  
Date\_ 20090408  
Time 14.29  
INSTRUM spect  
PROBHD 5 mm QNP 1H/13  
PULPROG zg30  
TD 65536  
SOLVENT CDCl3  
NS 16  
DS 2  
SWH 8278.146 Hz  
FIDRES 0.126314 Hz  
AQ 3.9584243 sec  
RG 287.4  
DW 60.400 usec  
DE 6.00 usec  
TE 291.2 K  
D1 1.00000000 sec  
TD0 1

==== CHANNEL f1 =====  
NUC1 1H  
P1 13.88 usec  
PL1 0.00 dB  
SF01 400.1324710 MHz  
F2 - Processing parameters  
SI 65536  
SF 400.1300094 MHz  
WDW no  
SSB 0  
LB 0.00 Hz  
GB 0  
PC 1.00

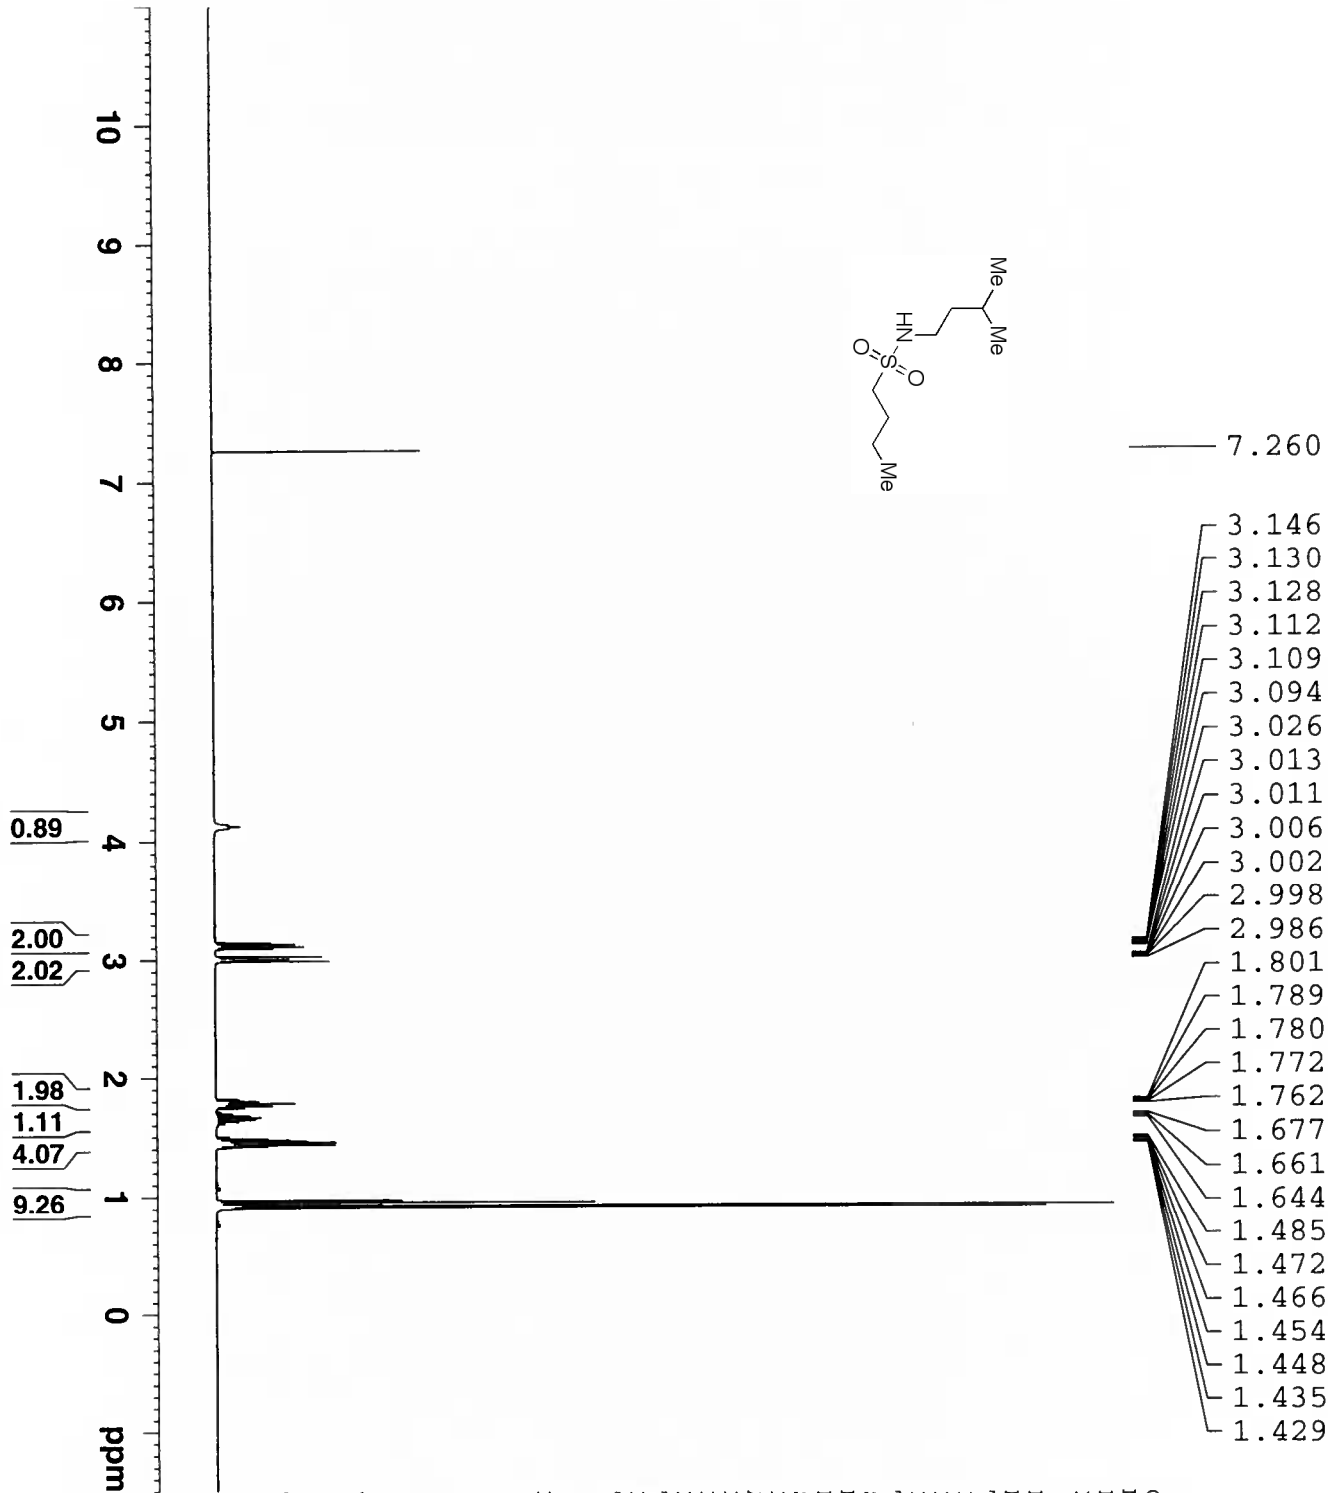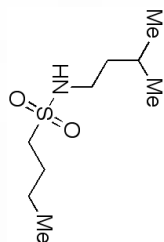

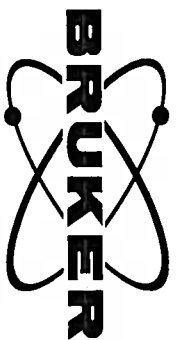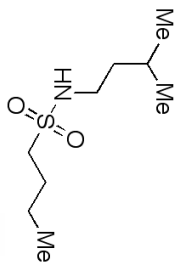

77.30  
76.99  
76.67  
52.00  
41.41  
38.97  
25.51  
25.34  
22.21  
21.44  
13.50

Current Data Parameters  
NAME alb-1-102-c13  
EXPNO 1  
PROCNO 1

F2 - Acquisition Parameters  
Date\_ 20090408  
Time 15.41

INSTRUM spect  
PROBHD 5 mm BBO BB-1H  
PULPROG zgpg30  
TD 65536  
SOLVENT CDCl3  
NS 128  
DS 2

SWH 23980.814 Hz  
FIDRES 0.365918 Hz  
AQ 1.3664756 sec  
RG 8192

DW 20.850 usec  
DE 6.00 usec  
TE 293.2 K  
D1 2.00000000 sec  
d11 0.03000000 sec  
DELTA 1.89999998 sec  
TD0 1

==== CHANNEL f1 =====  
NUC1 13C  
P1 8.75 usec  
PL1 -3.00 dB  
SFO1 100.6228298 MHz

==== CHANNEL f2 =====  
CPDPRG2 waltz16  
NUC2 1H  
PCPD2 90.00 usec  
PL2 -1.00 dB  
PL12 14.52 dB  
PL13 18.00 dB  
SFO2 400.1316005 MHz

F2 - Processing parameters  
SI 65536  
SF 100.6127801 MHz  
WDW no  
SSB 0  
LB 0.00 Hz  
GB 0  
PC 1.40

200 180 160 140 120 100 80 60 40 20 0 ppm

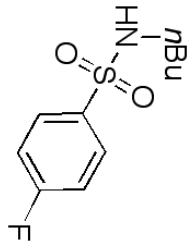

|       |
|-------|
| 7.900 |
| 7.895 |
| 7.888 |
| 7.883 |
| 7.882 |
| 7.878 |
| 7.870 |
| 7.865 |
| 7.261 |
| 7.260 |
| 7.214 |
| 7.208 |
| 7.196 |
| 7.193 |
| 7.192 |
| 7.191 |
| 7.187 |
| 7.176 |
| 7.170 |
| 2.982 |
| 2.966 |
| 2.964 |
| 2.948 |
| 2.931 |
| 1.563 |
| 1.467 |
| 1.465 |
| 1.460 |
| 1.448 |
| 1.447 |
| 1.441 |
| 1.432 |
| 1.429 |
| 1.424 |
| 1.411 |
| 1.410 |
| 1.320 |
| 1.302 |
| 1.301 |
| 1.288 |
| 1.287 |
| 1.282 |
| 1.264 |
| 0.876 |
| 0.858 |
| 0.839 |

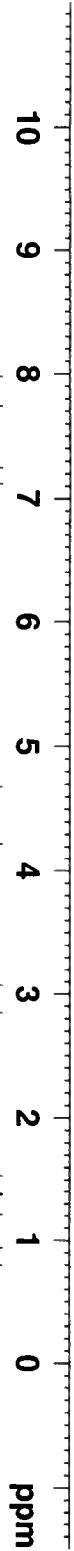

Current Data Parameters  
 NAME alb-1-29-h1  
 EXPNO 1  
 PROCNO 1

F2 - Acquisition Parameters

Date\_ 20090514  
 Time 20.15  
 INSTRUM spect  
 PROBHD 5 mm BBO BB-1H  
 PULPROG zg30  
 TD 65536  
 SOLVENT CDCl3  
 NS 16  
 DS 2  
 SWH 8278.146  
 FIDRES 0.126314  
 AQ 3.9584243  
 RG 203.2  
 DW 60.400  
 DE 6.00  
 TE 298.2  
 D1 1.00000000  
 TD0 1

==== CHANNEL f1 ====  
 NUC1 1H  
 P1 15.07  
 PL1 0.00  
 SF01 400.1324710

F2 - Processing parameters  
 SI 65536  
 SF 400.1300095  
 WDW no  
 SSB 0  
 LB 0.00  
 GB 0  
 PC 1.00

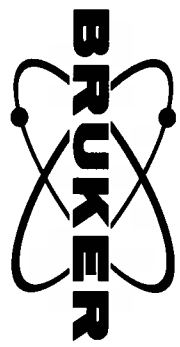

Current Data Parameters  
 NAME alb-1-29-C13  
 EXPNO 1  
 PROCNO 1

F2 - Acquisition Parameters

Date\_ 20090514  
 Time 20.49  
 INSTRUM spect  
 PROBHD 5 mm BBO BB-1H  
 PULPROG zgpg30  
 TD 65536  
 SOLVENT CDCl3  
 NS 129  
 DS 2  
 SWH 23980.814 Hz  
 FIDRES 0.365918 Hz  
 AQ 1.3664756 sec  
 RG 14596.5  
 DW 20.850 usec  
 DE 6.00 usec  
 TE 298.2 K  
 D1 2.0000000 sec  
 d11 0.0300000 sec  
 DELTA 1.89999998 sec  
 TD0 1

==== CHANNEL f1 =====  
 NUC1 13C  
 P1 8.75 usec  
 PL1 -3.00 dB  
 SFO1 100.6228298 MHz

==== CHANNEL f2 =====  
 CPDPRG2 waltz216  
 NUC2 1H  
 PCPD2 90.00 usec  
 PL2 -1.00 dB  
 PL12 14.52 dB  
 PL13 18.00 dB  
 SFO2 400.1316005 MHz

F2 - Processing parameters  
 SI 65536  
 SF 100.6127757 MHz  
 WDW no  
 SSB 0  
 LB 0.00 Hz  
 GB 0  
 PC 1.40

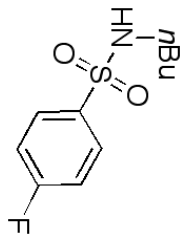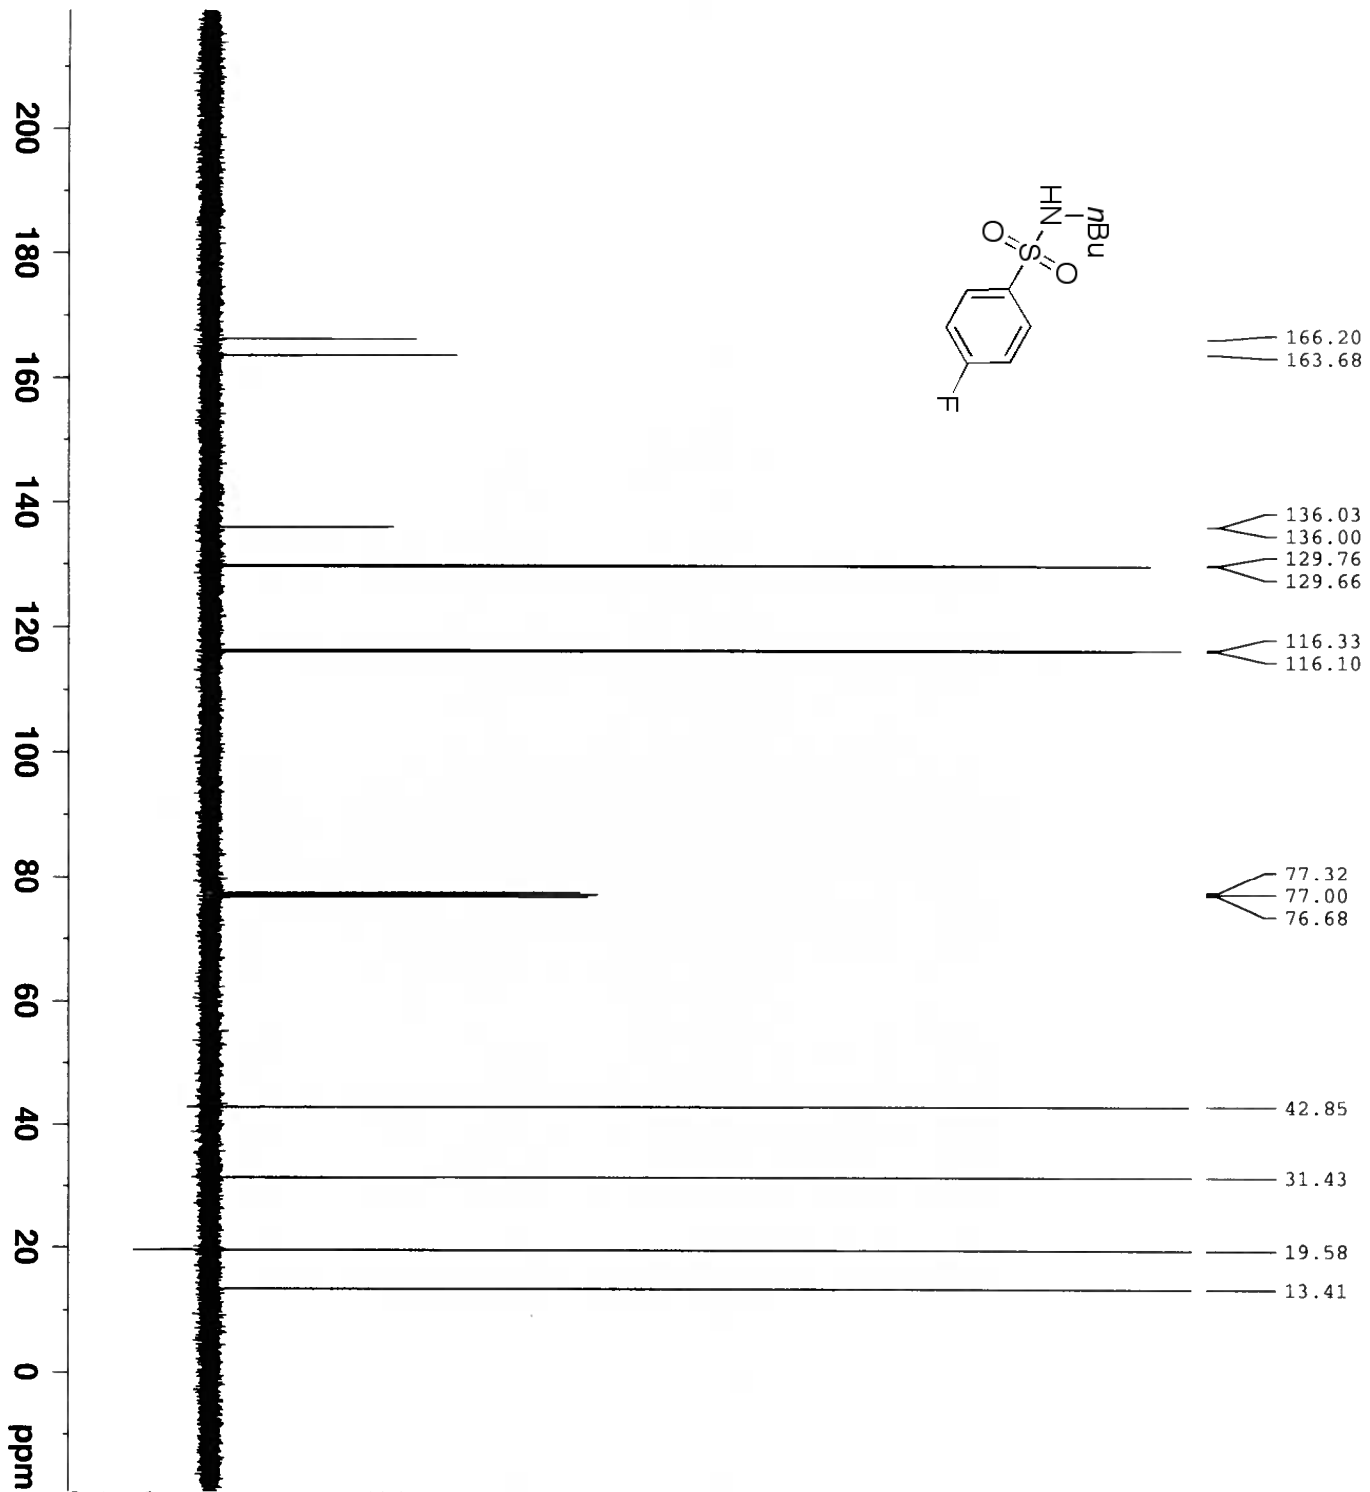

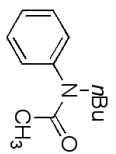

Current Data Parameters  
 NAME jdh-4-151-H1  
 EXPNO 1  
 PROCNO 1

F2 - Acquisition Parameters  
 Date\_ 20090526  
 Time 17.06  
 INSTRUM spect  
 PROBHD 5 mm BBO BB-1H  
 PULPROG zg30  
 TD 65536  
 SOLVENT CDCl3  
 NS 16  
 DS 2  
 SWH 8278.146  
 FIDRES 0.126314  
 AQ 3.9584243  
 RG 203.2  
 DW 60.400  
 DE 6.00  
 TE 298.2  
 D1 1.00000000  
 TD0 1  
 1  
 1  
 0

==== CHANNEL f1 ====  
 NUCL 1H  
 P1 15.07  
 PL1 0.00  
 SFO1 400.1324710

F2 - Processing parameters  
 SI 65536  
 SF 400.1300102  
 WDW no  
 SSB 0  
 LB 0.00  
 GB 0  
 PC 1.00

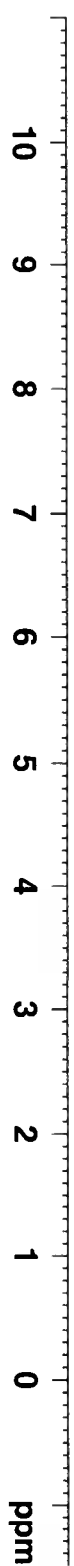

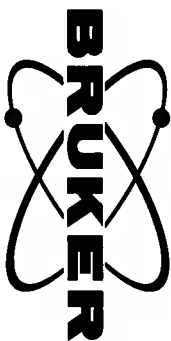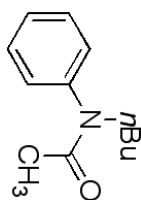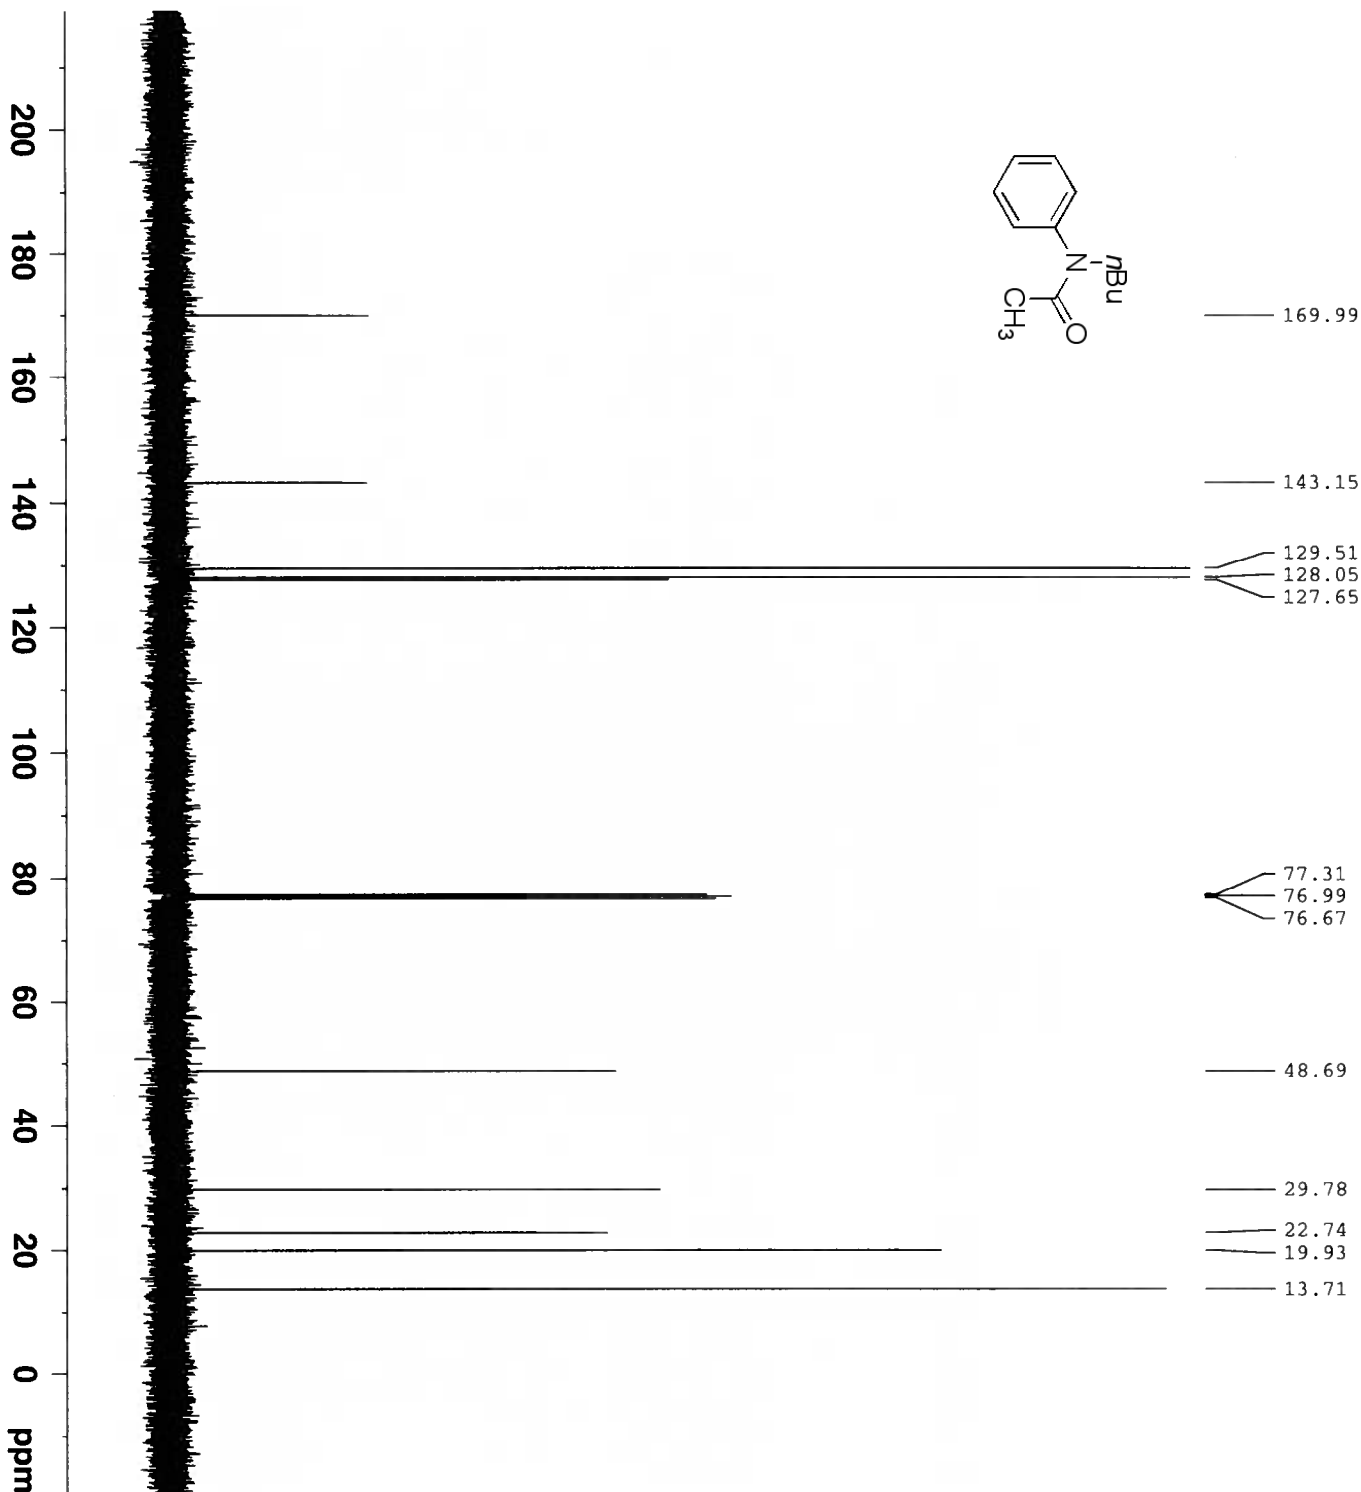

Current Data Parameters  
 NAME jdh-4-151-cl3  
 EXPNO 1  
 PROCNO 1

F2 - Acquisition Parameters

Date\_ 20090526  
 Time 17.16  
 INSTRUM spect  
 PROBHD 5 mm BBO BB-1H  
 PULPROG zgpg30  
 TD 65536  
 SOLVENT CDCl3  
 NS 128  
 DS 2  
 SWH 23980.814 Hz  
 FIDRES 0.365918 Hz  
 AQ 1.3664756 sec  
 RG 8192  
 DW 20.850 usec  
 DE 6.00 usec  
 TE 298.2 K  
 D1 2.00000000 sec  
 d11 0.03000000 sec  
 DELTA 1.89999998 sec  
 TD0 1

==== CHANNEL f1 =====

NUC1 13C  
 P1 8.75 usec  
 PL1 -3.00 dB  
 SFO1 100.6228298 MHz

==== CHANNEL f2 =====

CPDPRG2 waltz16  
 NUC2 1H  
 PCPD2 90.00 usec  
 PL2 -1.00 dB  
 PL12 14.52 dB  
 PL13 18.00 dB  
 SFO2 400.1316005 MHz

F2 - Processing parameters

SI 65536  
 SF 100.6127783 MHz  
 WDW no  
 SSB 0  
 LB 0.00 Hz  
 GB 0  
 PC 1.40
